# Supplementary material for: Genomic Landscapes and Hallmarks of Mutant RAS in Human Cancers
Source: PubMed Central journal article supplement — Cancer Res. 2022 Sep 8;82(21):4058–78. doi: 10.1158/0008-5472.CAN-22-1731 (PMC9627127; doi:10.1158/0008-5472.can-22-1731), 2022-09-08
Supplement: can-22-1731_supplementary_fig.s9_supp9.pdf [file can-22-1731_supplementary_fig.s9_supp9.pdf]

# Supplementary Figure S9

CRC, KRAS (Codon 12)

CRC, RAS (Codon 12, 13, or 61)

Melanoma, RAS (Codon 12, 13, or 61)

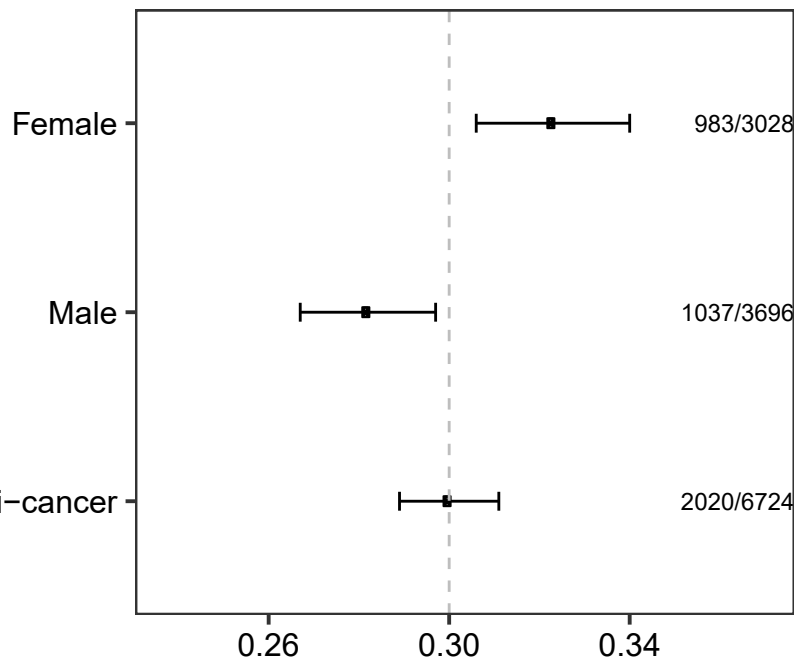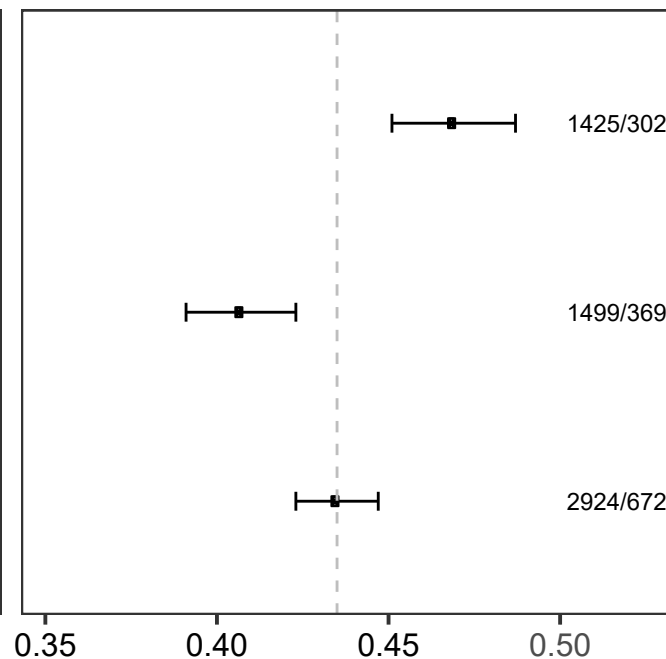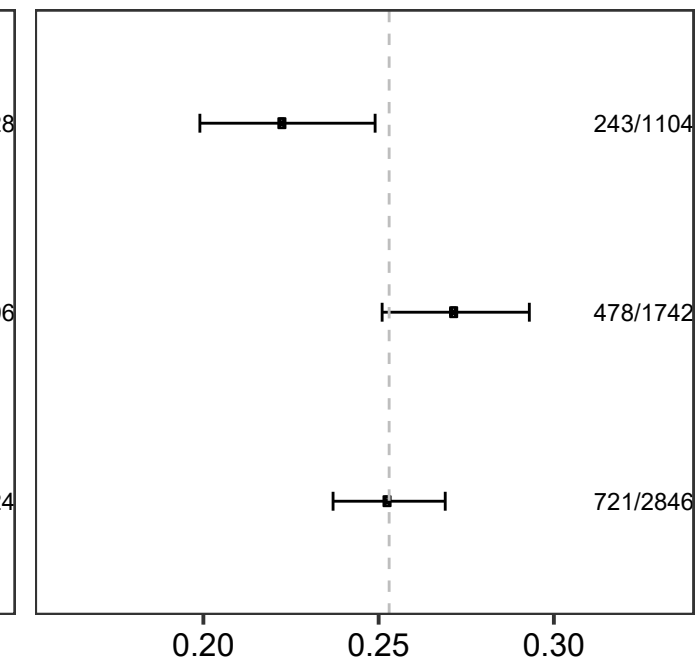

NSCLC, KRAS (Codon 12)

NSCLC, KRAS (Codon G12C)

NSCLC, RAS (Codon 12, 13, or 61)

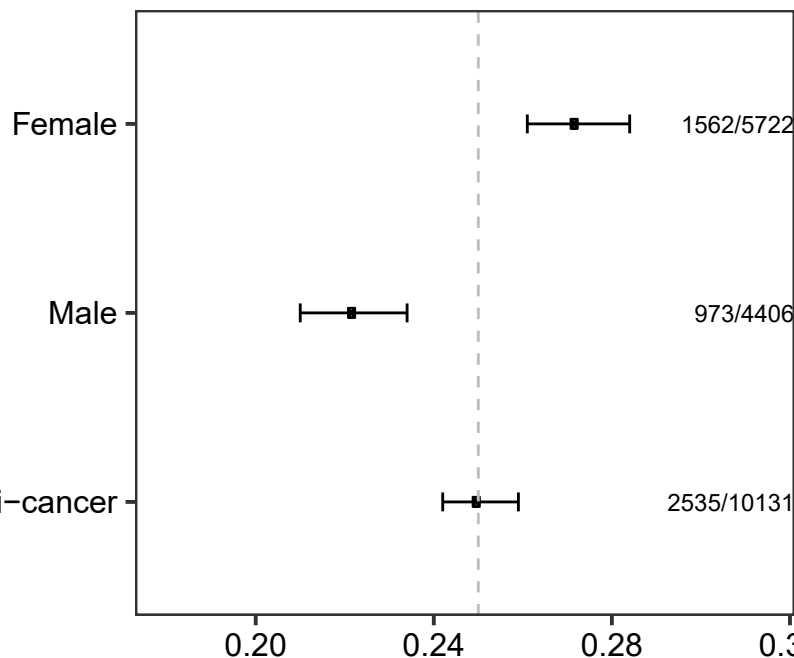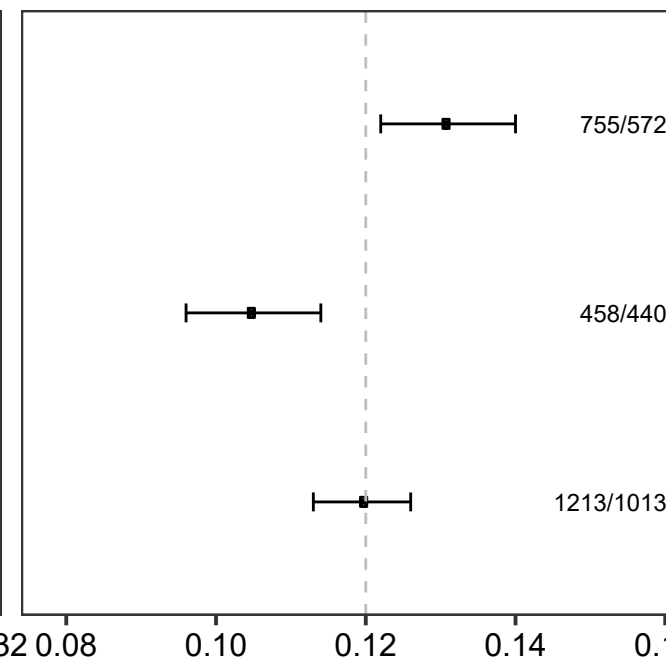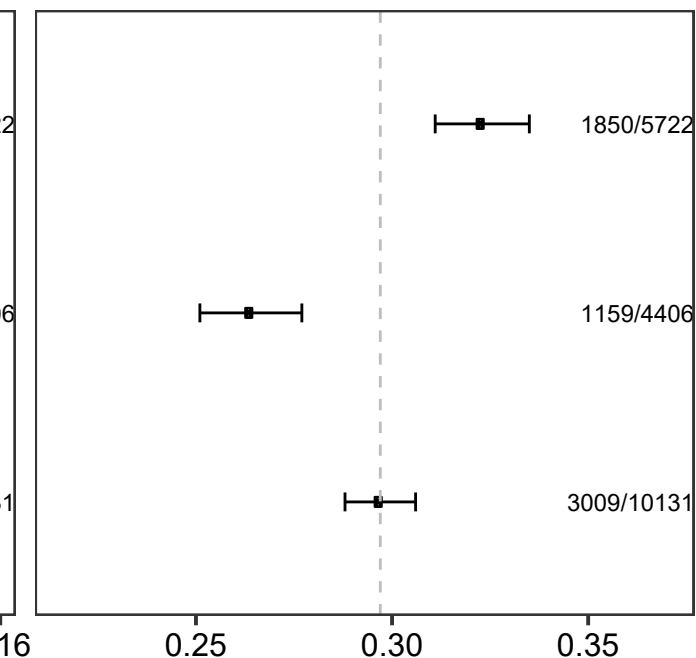

Prevalence
