# Supplementary material for: Genomic Landscapes and Hallmarks of Mutant RAS in Human Cancers
Source: PubMed Central journal article supplement — Cancer Res. 2022 Sep 8;82(21):4058–78. doi: 10.1158/0008-5472.CAN-22-1731 (PMC9627127; doi:10.1158/0008-5472.can-22-1731), 2022-09-08
Supplement: can-22-1731_supplementary_fig.s11_supp11.pdf [file can-22-1731_supplementary_fig.s11_supp11.pdf]

# Supplementary Figure S11

**A**

KRAS Codons 12, 13, or 61

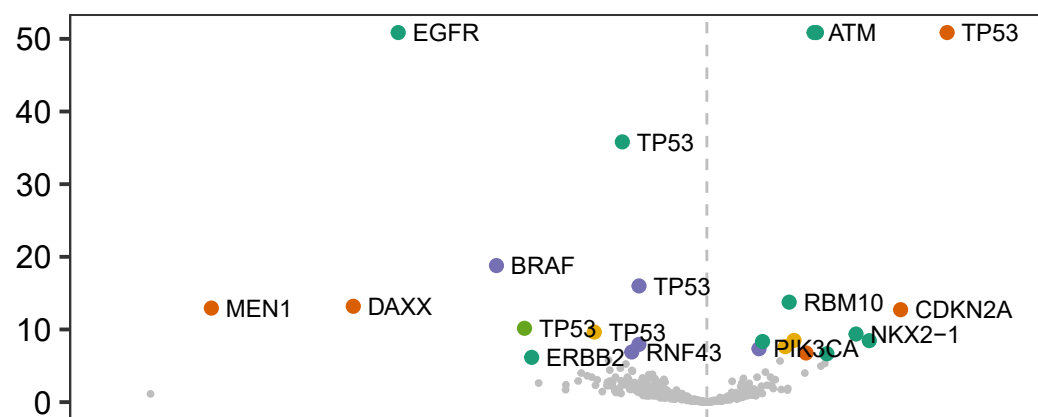

**B**

KRAS Codons 12, 13, or 61

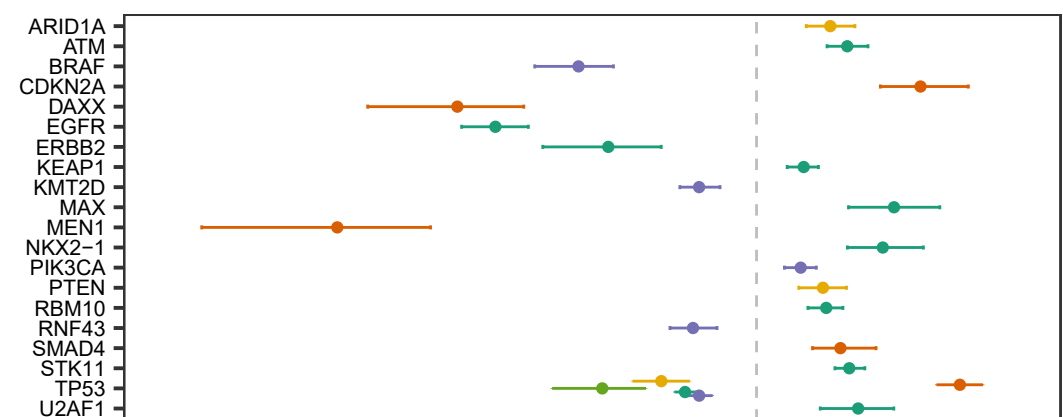

**C**

KRAS Codon 12

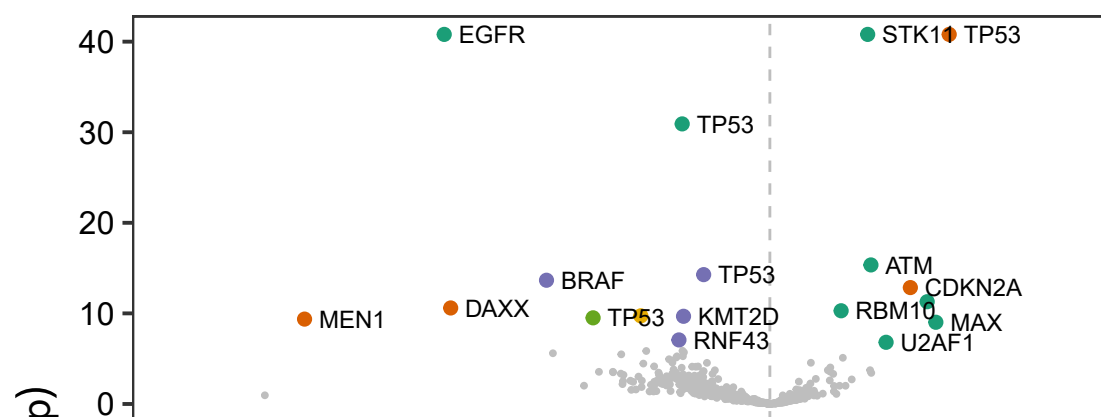

**D**

KRAS Codon 12

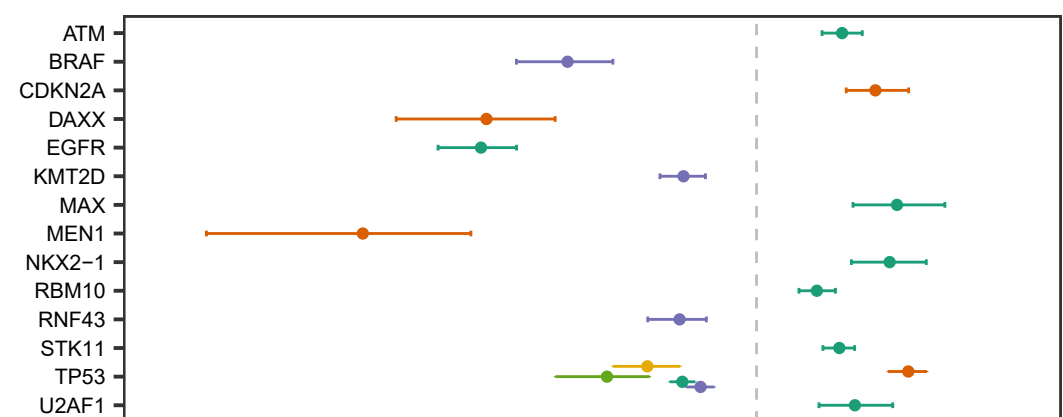

**E**

KRAS Codon 13

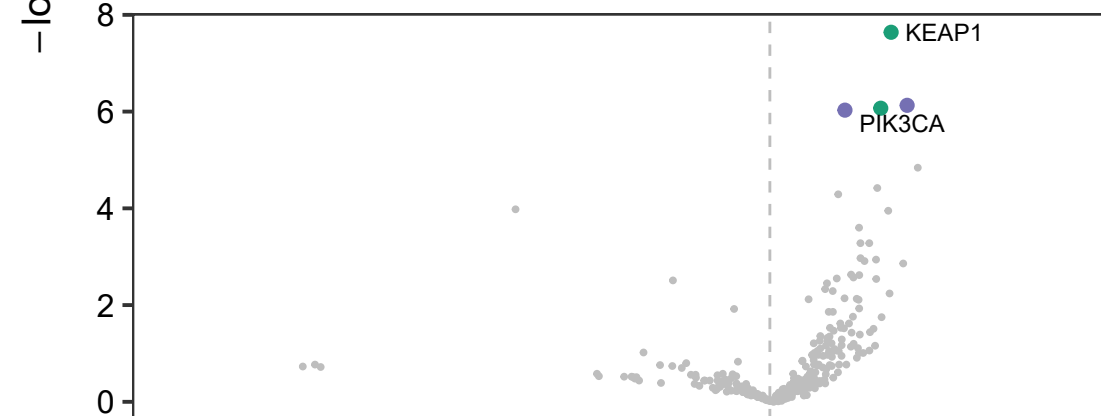

**F**

KRAS Codon 13

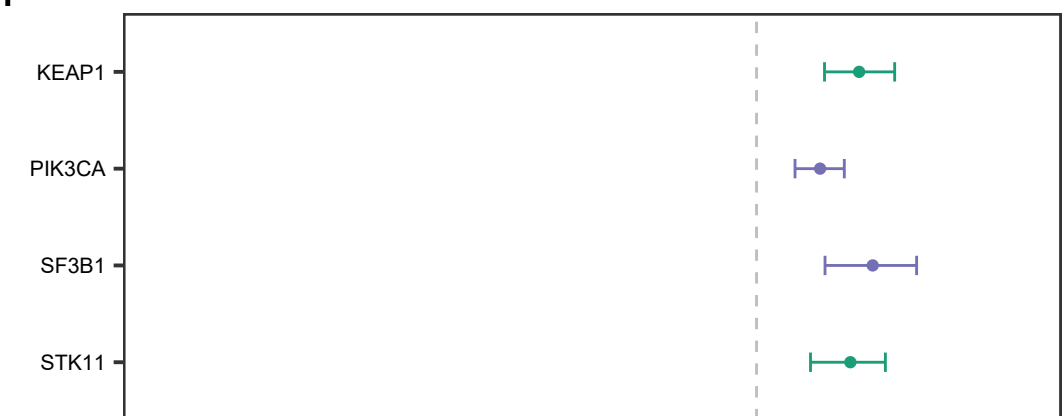

**G**

KRAS G12C

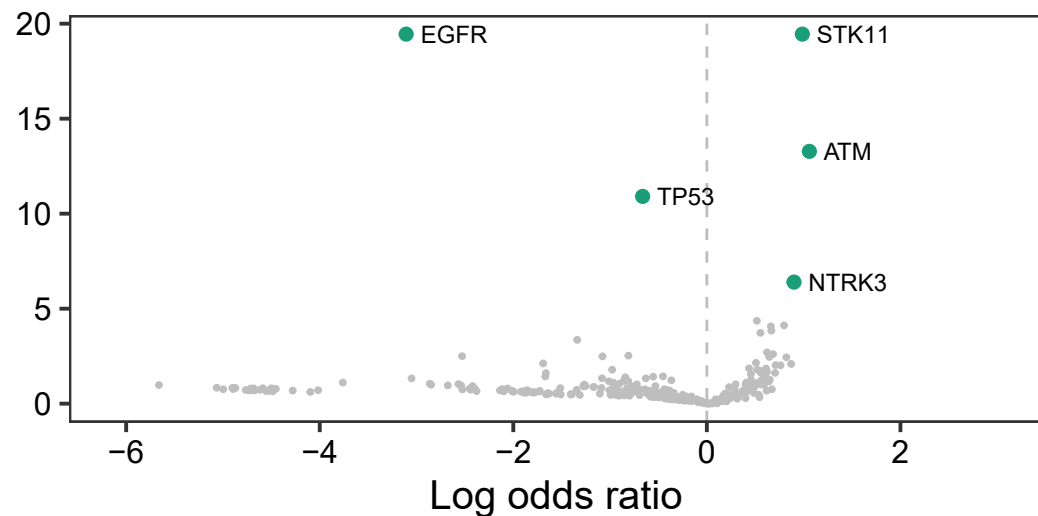

**H**

KRAS G12C

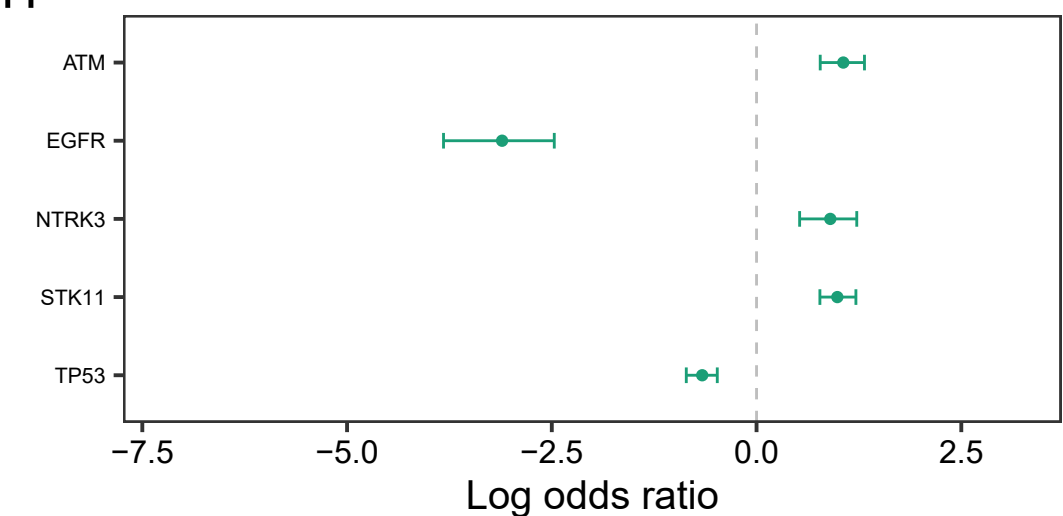

● colorectal cancer ● non-small cell lung cancer ● ovarian cancer ● pancreatic cancer ● uterine cancer
