# Supplementary material for: Genomic Landscapes and Hallmarks of Mutant RAS in Human Cancers
Source: PubMed Central journal article supplement — Cancer Res. 2022 Sep 8;82(21):4058–78. doi: 10.1158/0008-5472.CAN-22-1731 (PMC9627127; doi:10.1158/0008-5472.can-22-1731), 2022-09-08
Supplement: can-22-1731_supplementary_fig.s12_supp12.pdf [file can-22-1731_supplementary_fig.s12_supp12.pdf]

# Supplementary Figure S12

**A**

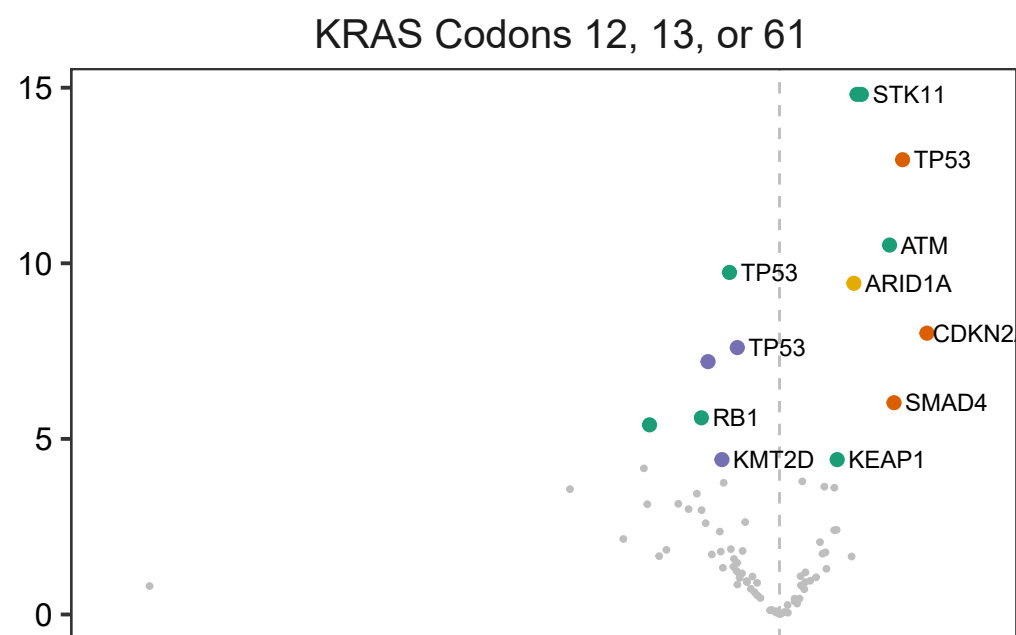

**B**

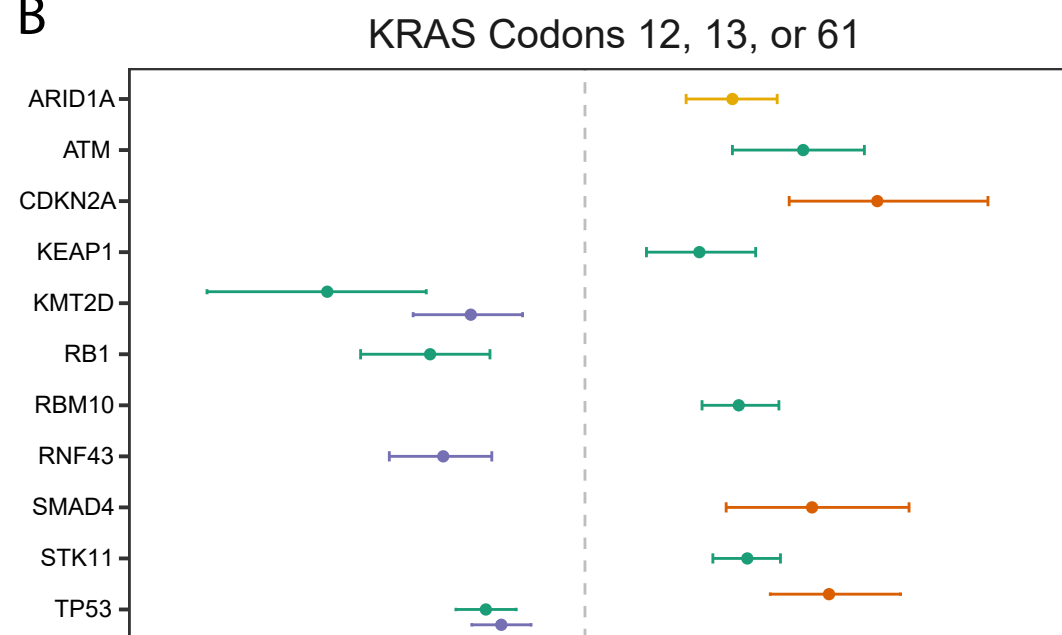

**C**

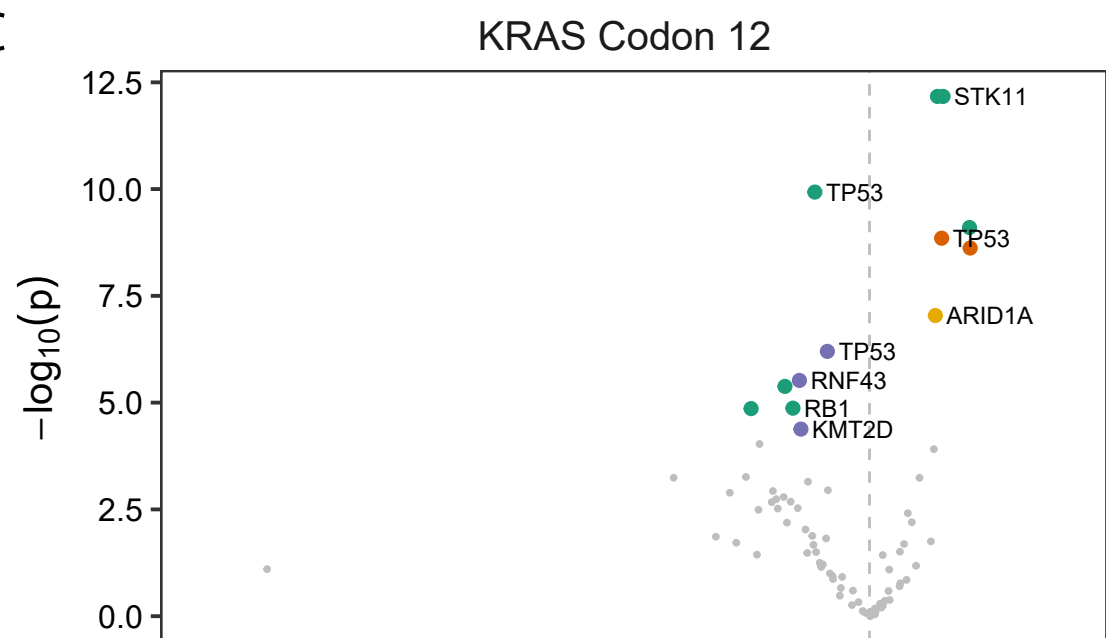

**D**

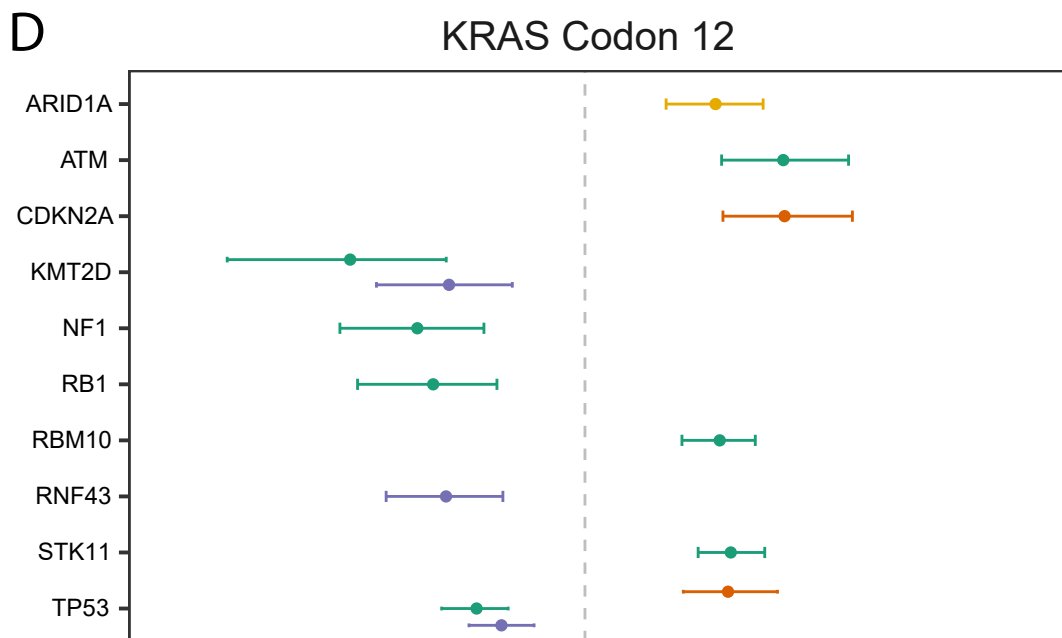

**E**

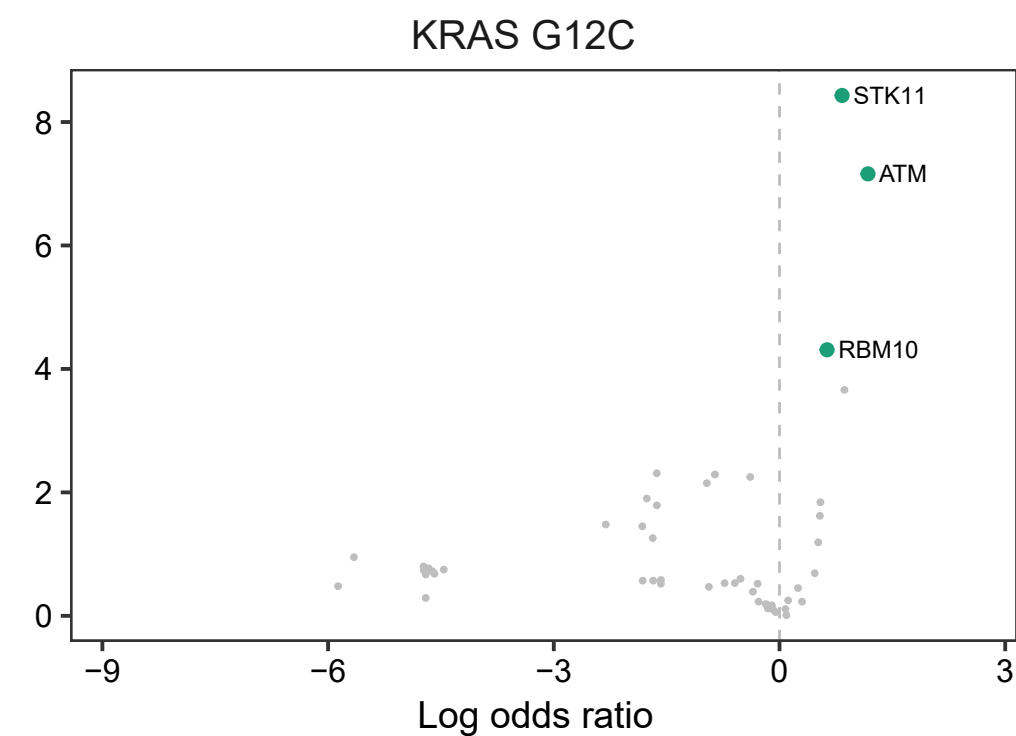

**F**

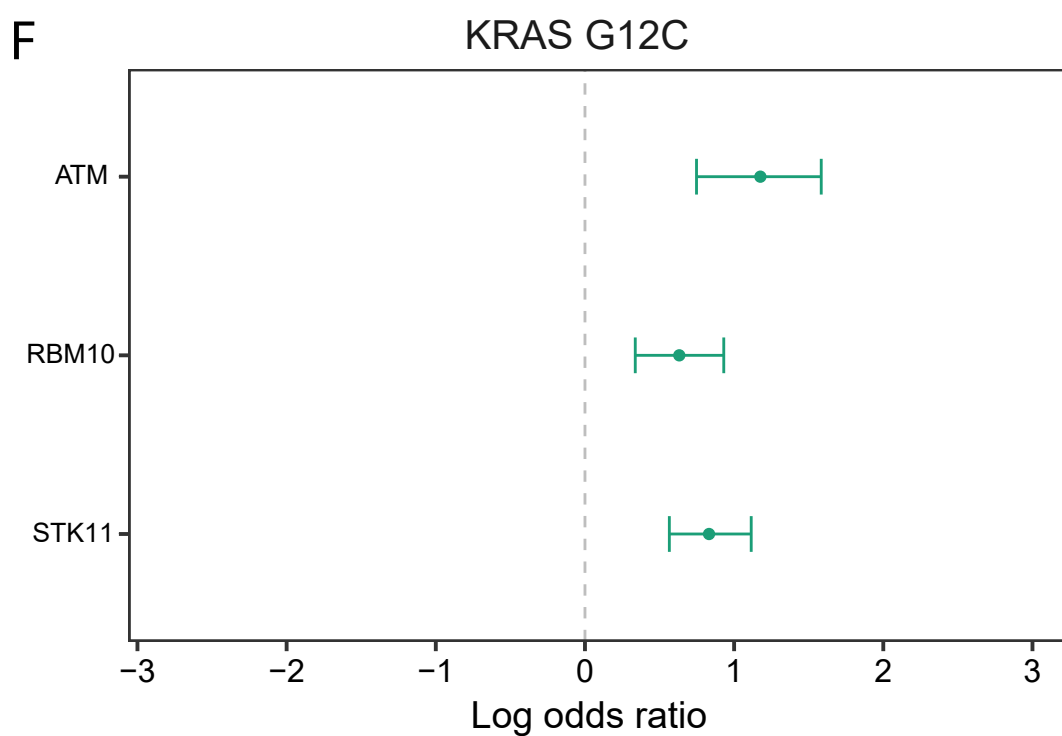

● colorectal cancer ● non-small cell lung cancer ● pancreatic cancer ● uterine cancer
