# Supplementary material for: Genomic Landscapes and Hallmarks of Mutant RAS in Human Cancers
Source: PubMed Central journal article supplement — Cancer Res. 2022 Sep 8;82(21):4058–78. doi: 10.1158/0008-5472.CAN-22-1731 (PMC9627127; doi:10.1158/0008-5472.can-22-1731), 2022-09-08

A

### KRAS codon 12 / NTRK3 co-mutant vs KRAS codon 12 mutant LUAD

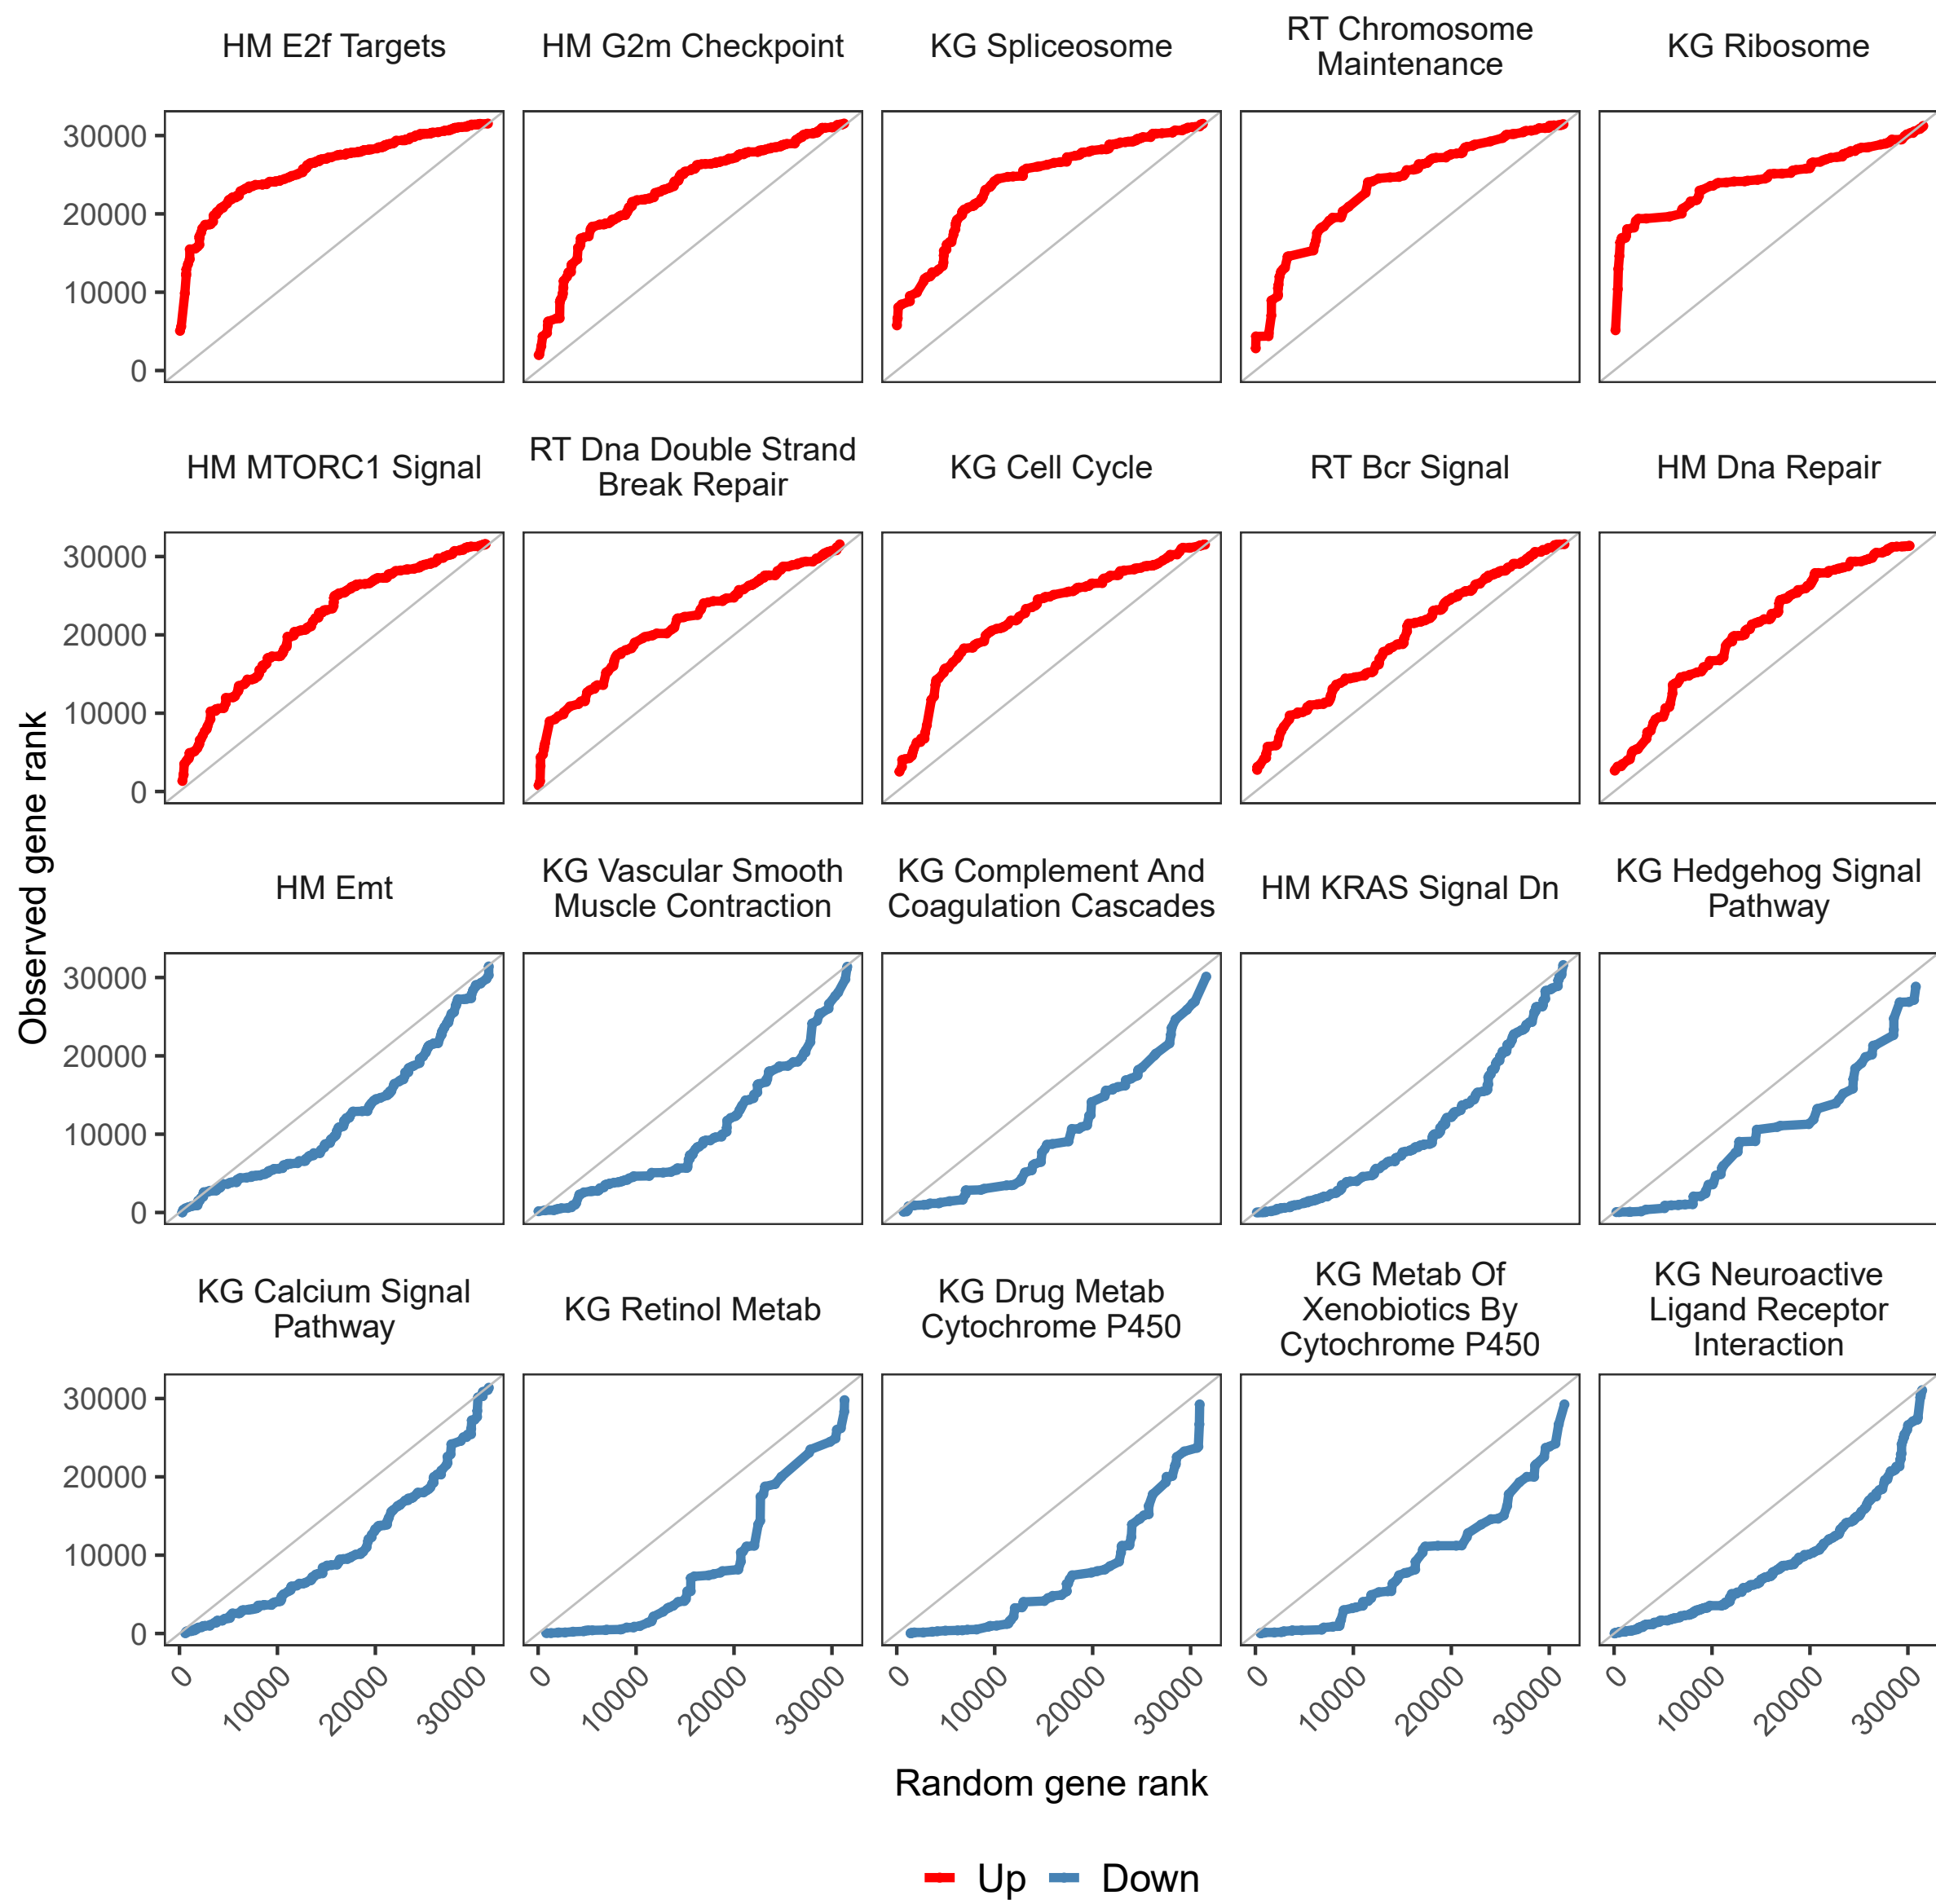

B

### KRAS G12C / PTPRD co-mutant vs KRAS G12C mutant LUAD

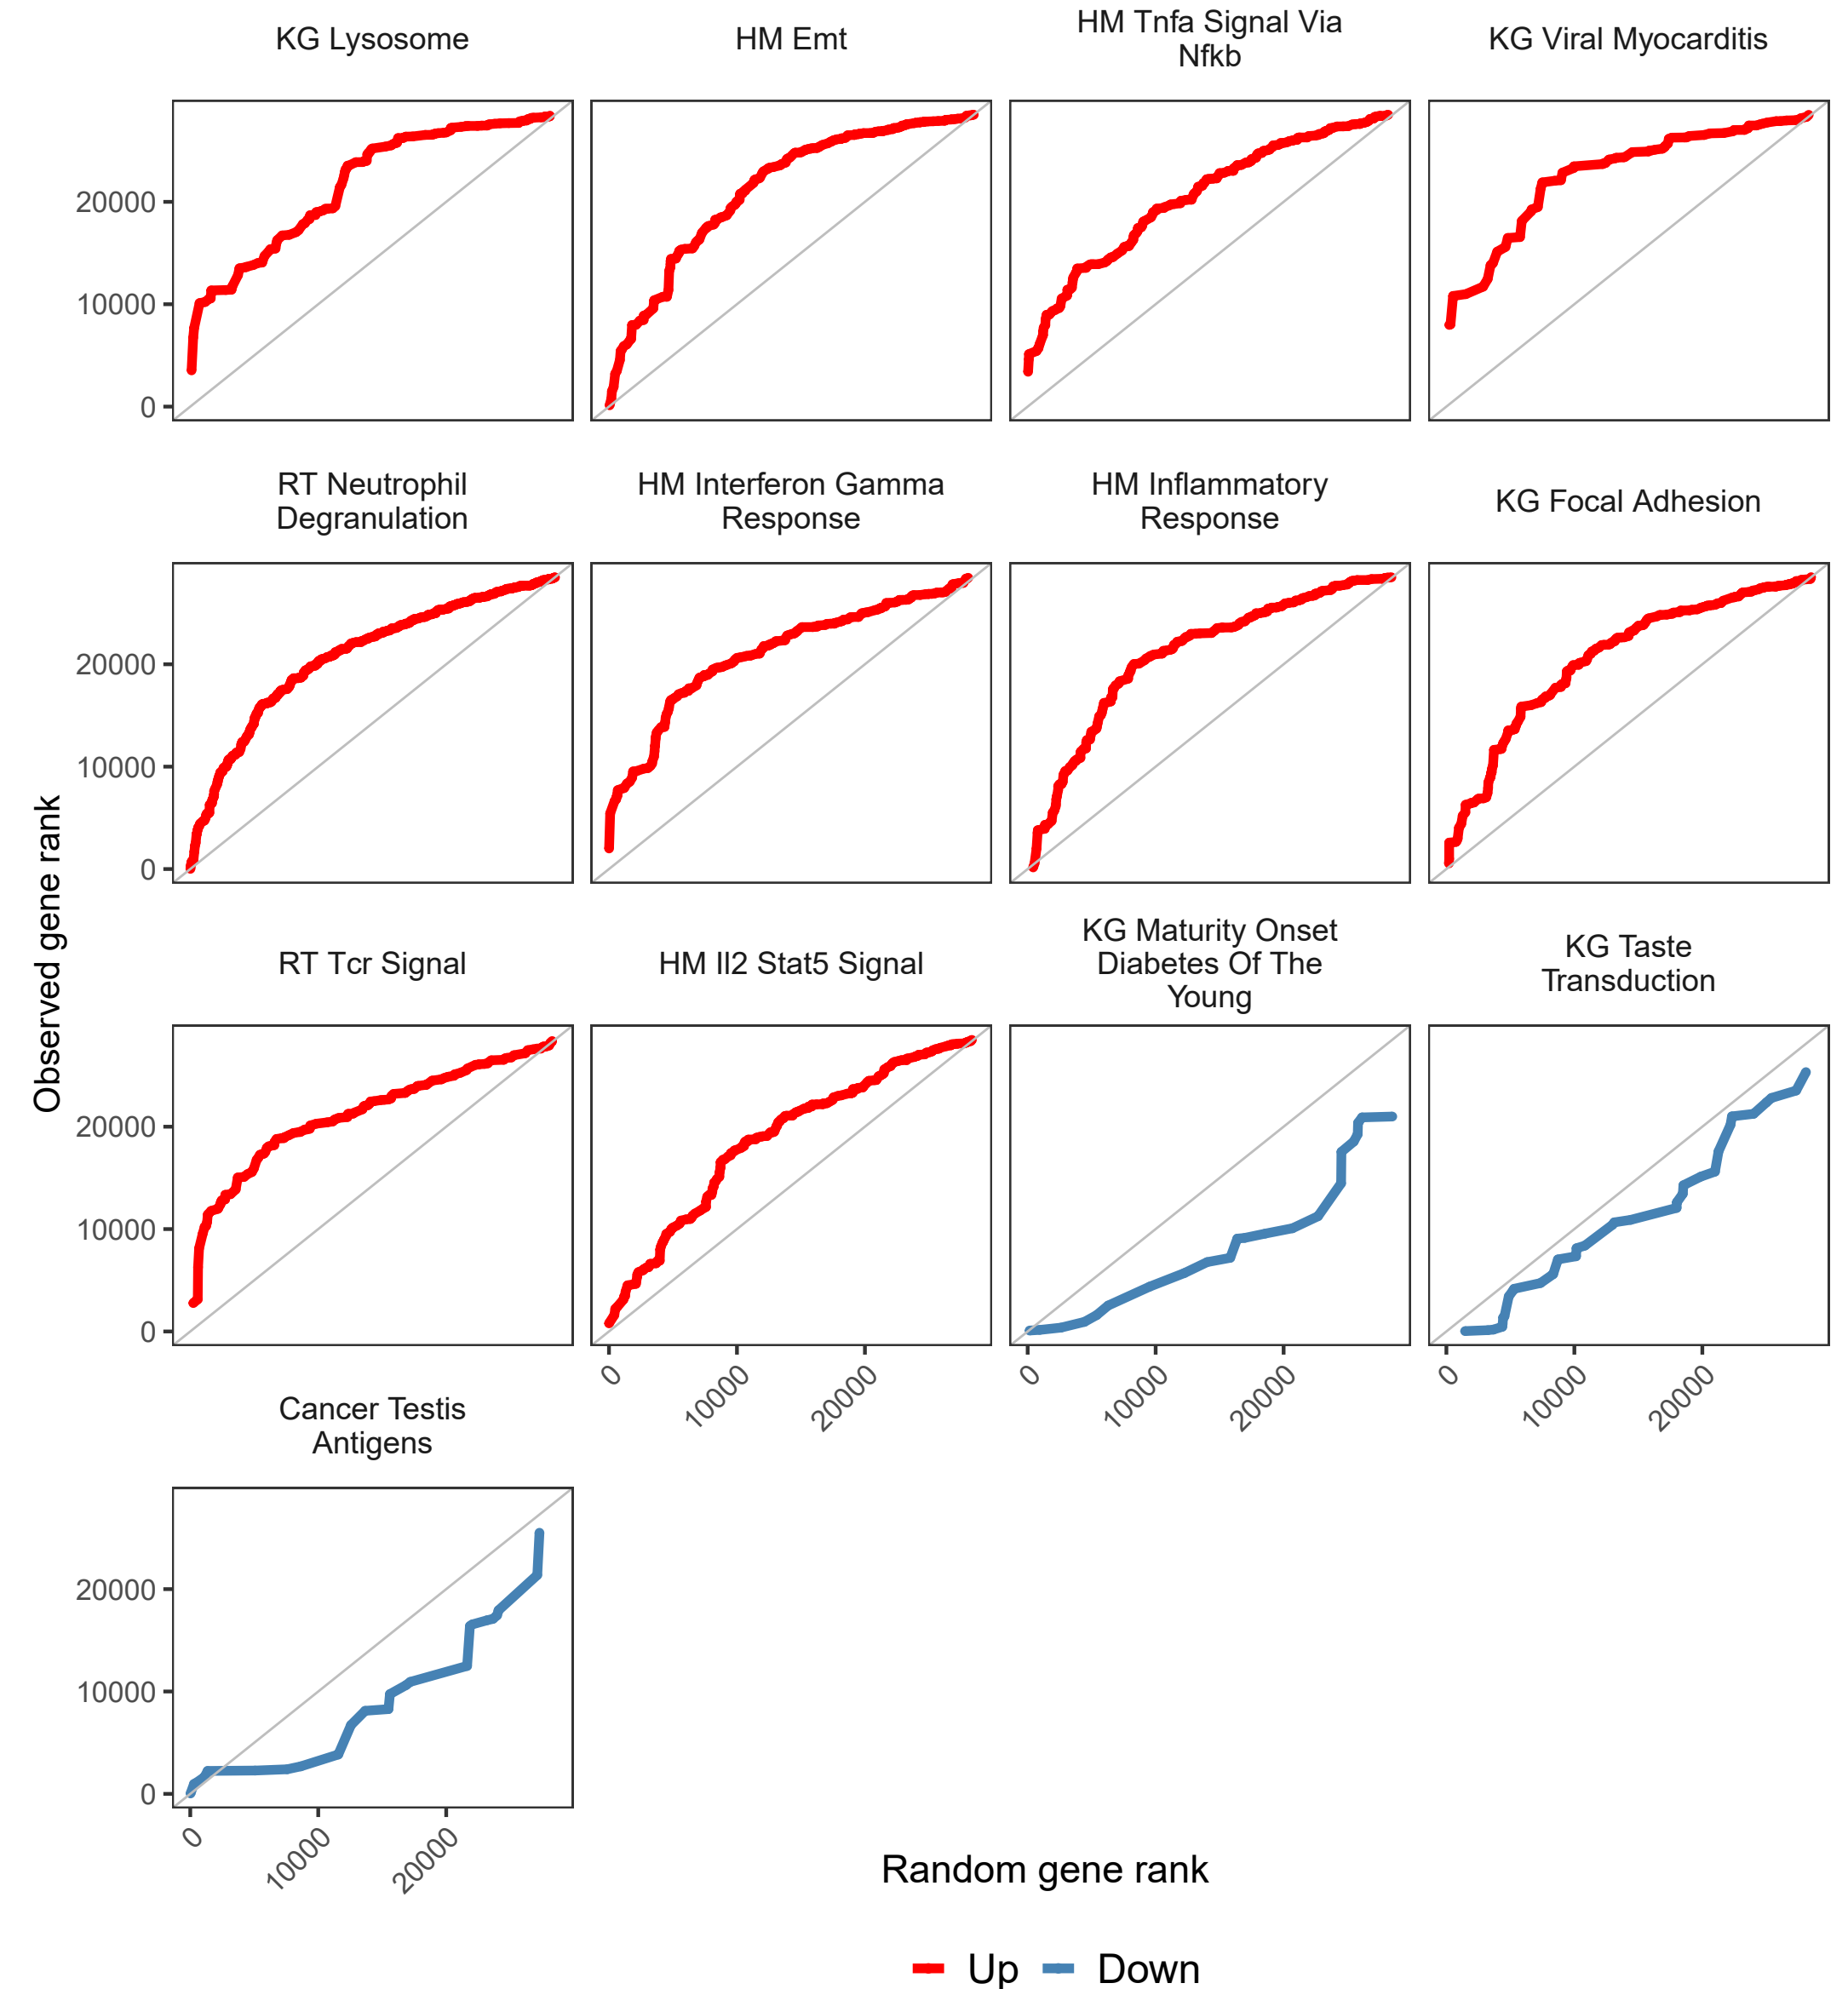

C

### KRAS G12V / TP53 co-mutant vs TP53 mutant LUAD

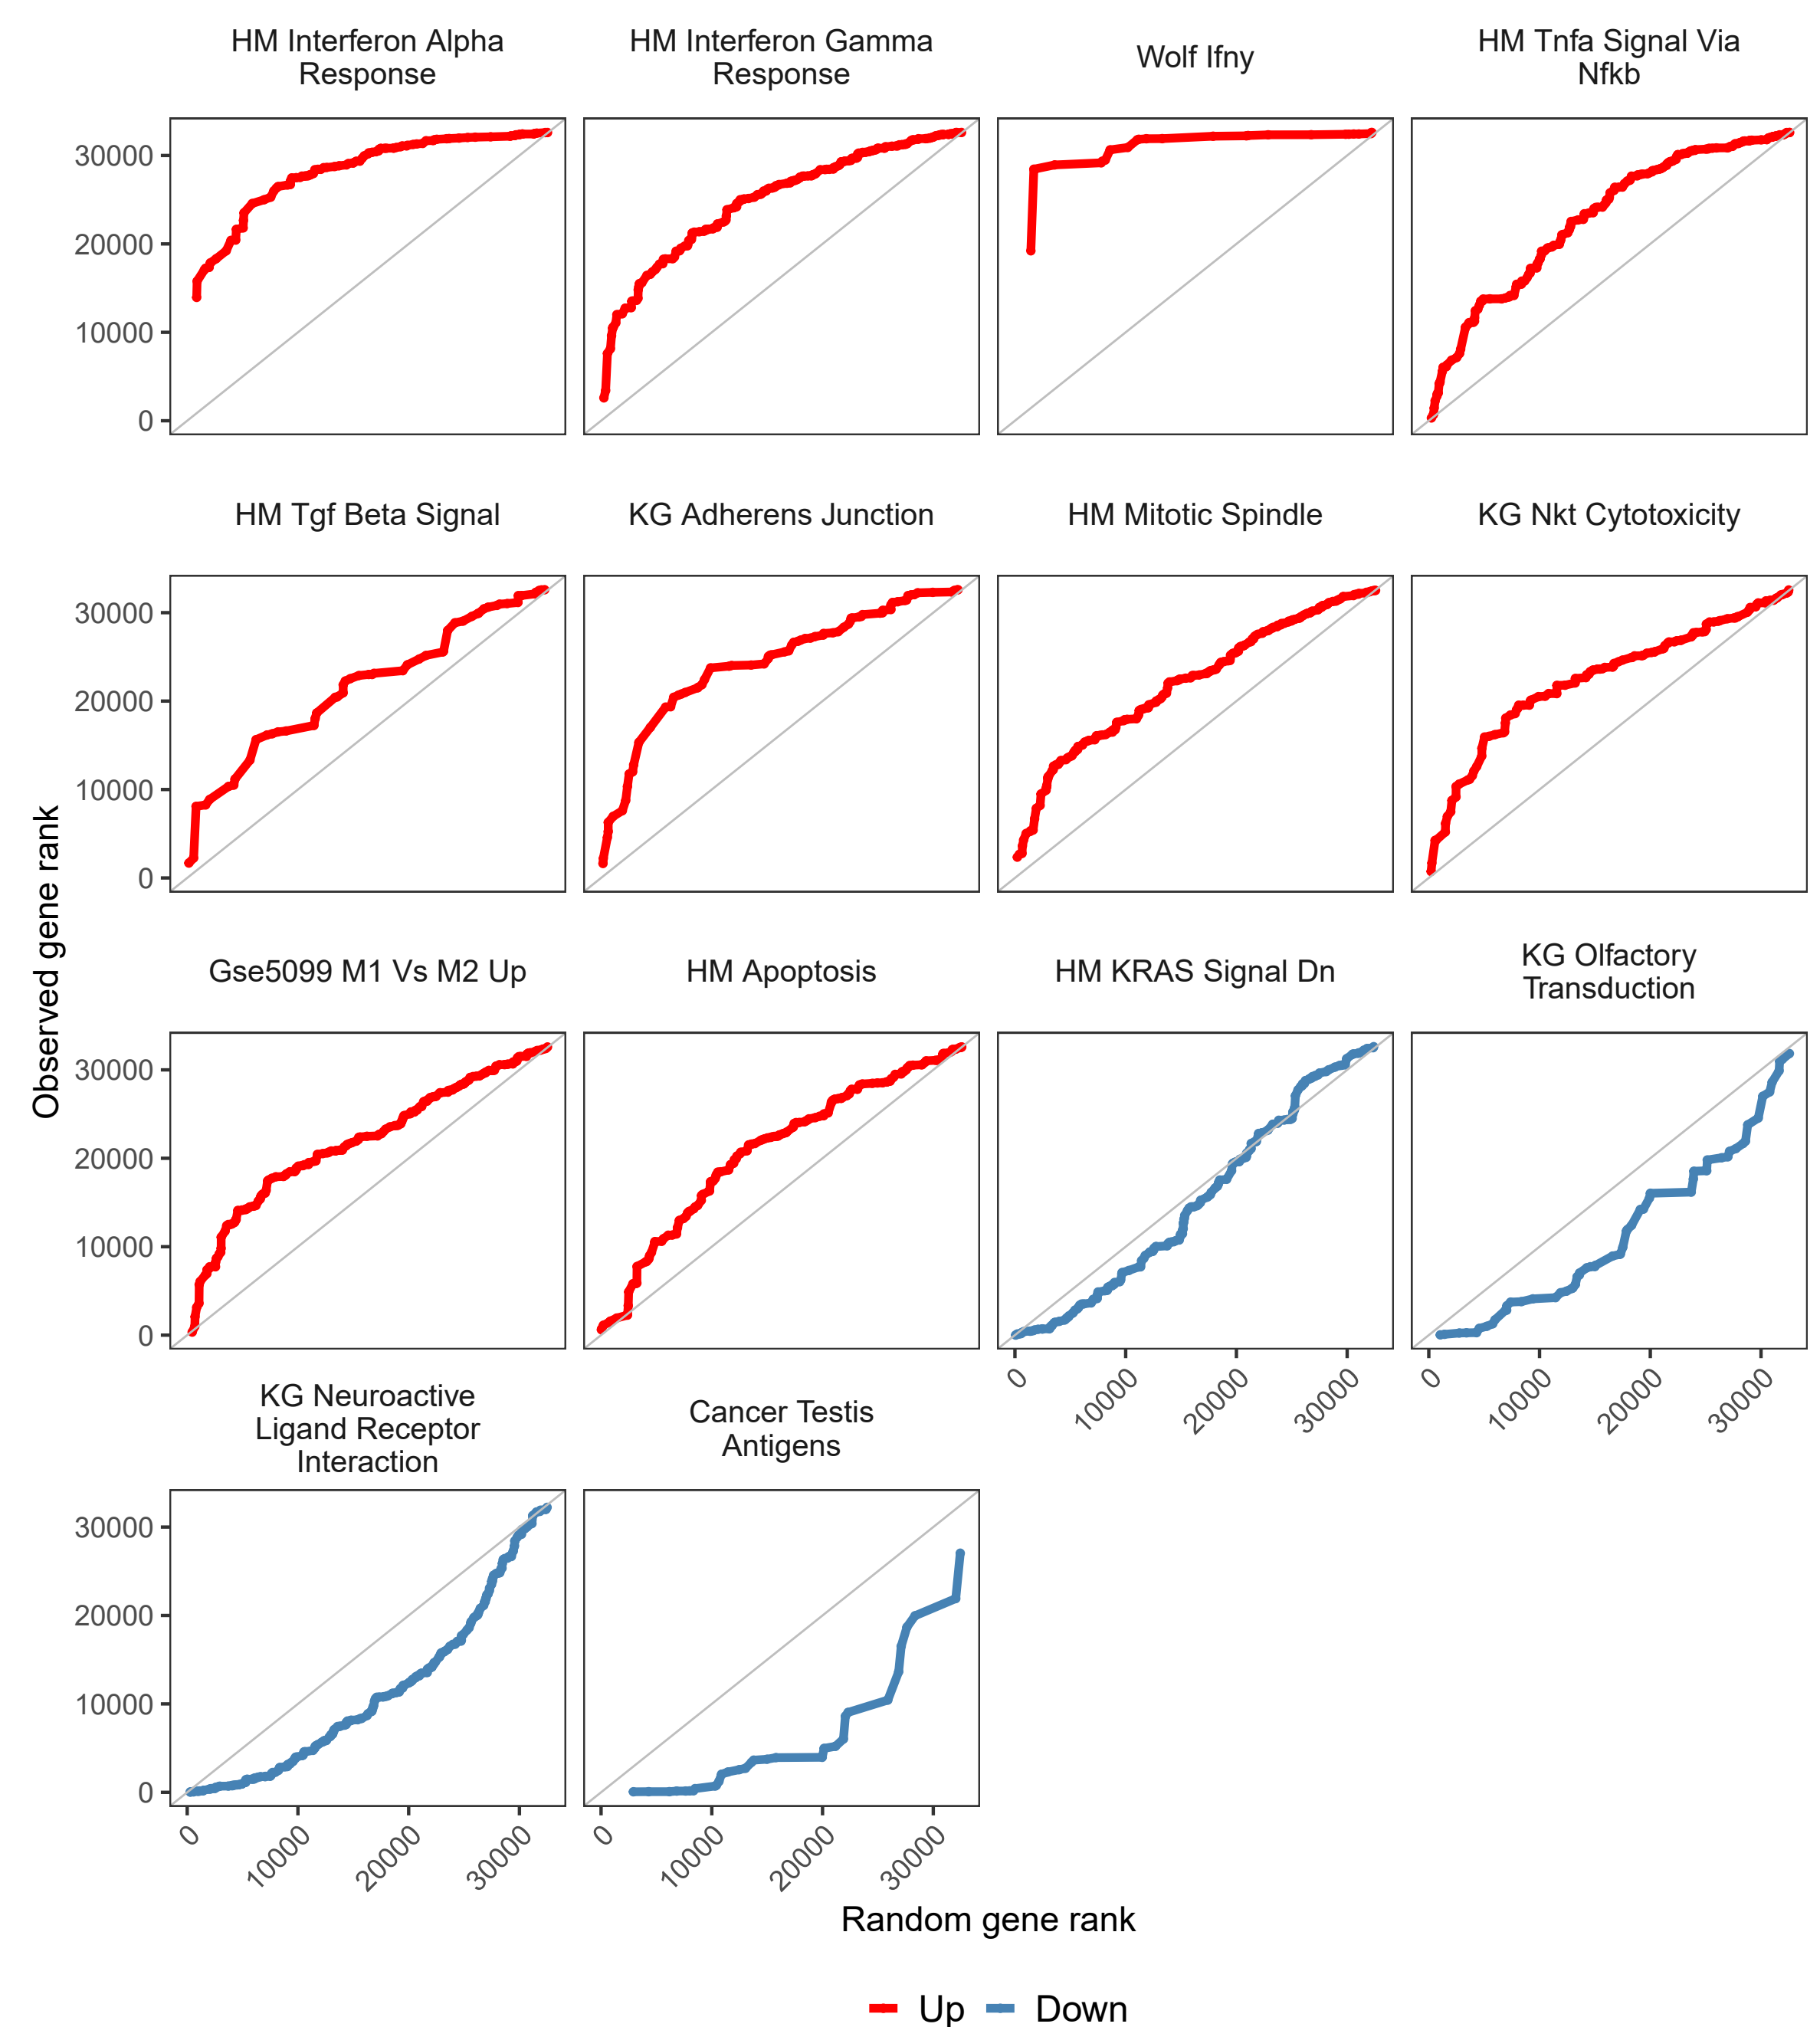

D

### KRAS G12C / RBM10 co-mutant vs KRAS G12C mutant LUAD

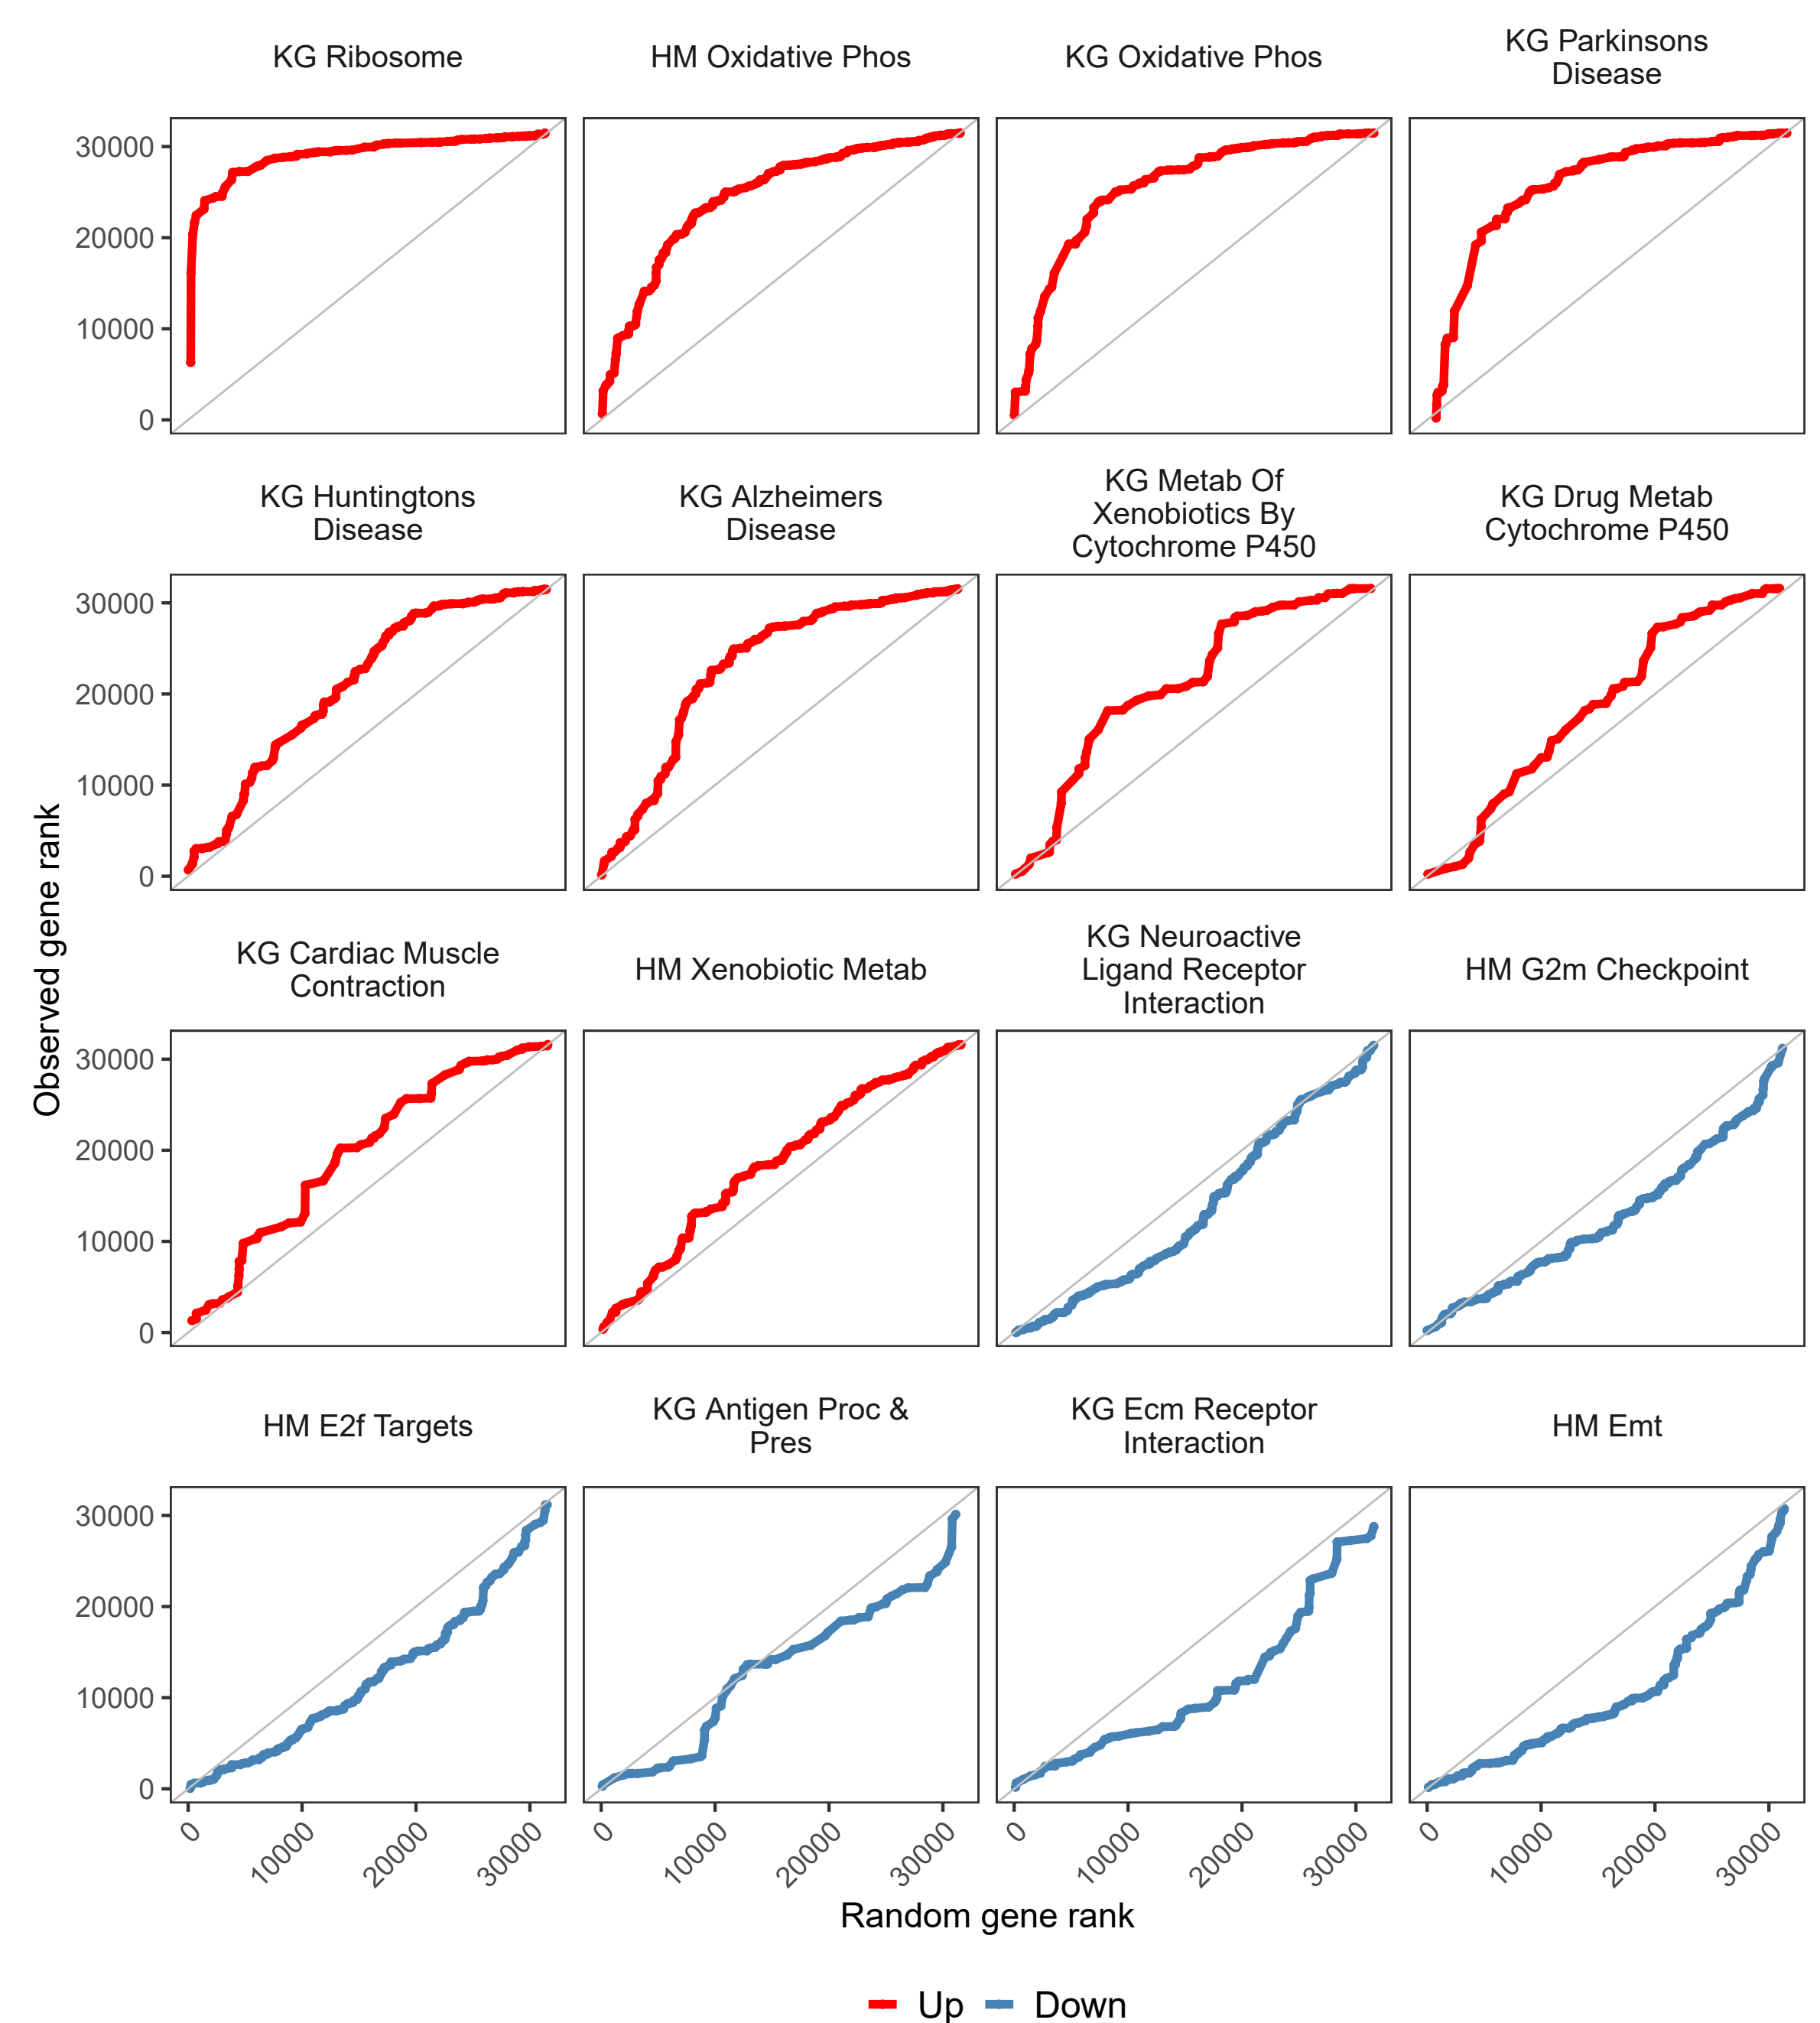

Supplement: can-22-1731_supplementary_fig.s16_supp16.pdf [file can-22-1731_supplementary_fig.s16_supp16.pdf]
