# Supplementary material for: Genomic Landscapes and Hallmarks of Mutant RAS in Human Cancers
Source: PubMed Central journal article supplement — Cancer Res. 2022 Sep 8;82(21):4058–78. doi: 10.1158/0008-5472.CAN-22-1731 (PMC9627127; doi:10.1158/0008-5472.can-22-1731), 2022-09-08

# Supplementary Figure S20

**A**

KRAS G12V / TP53 co-mutant vs KRAS G12V mutant COAD

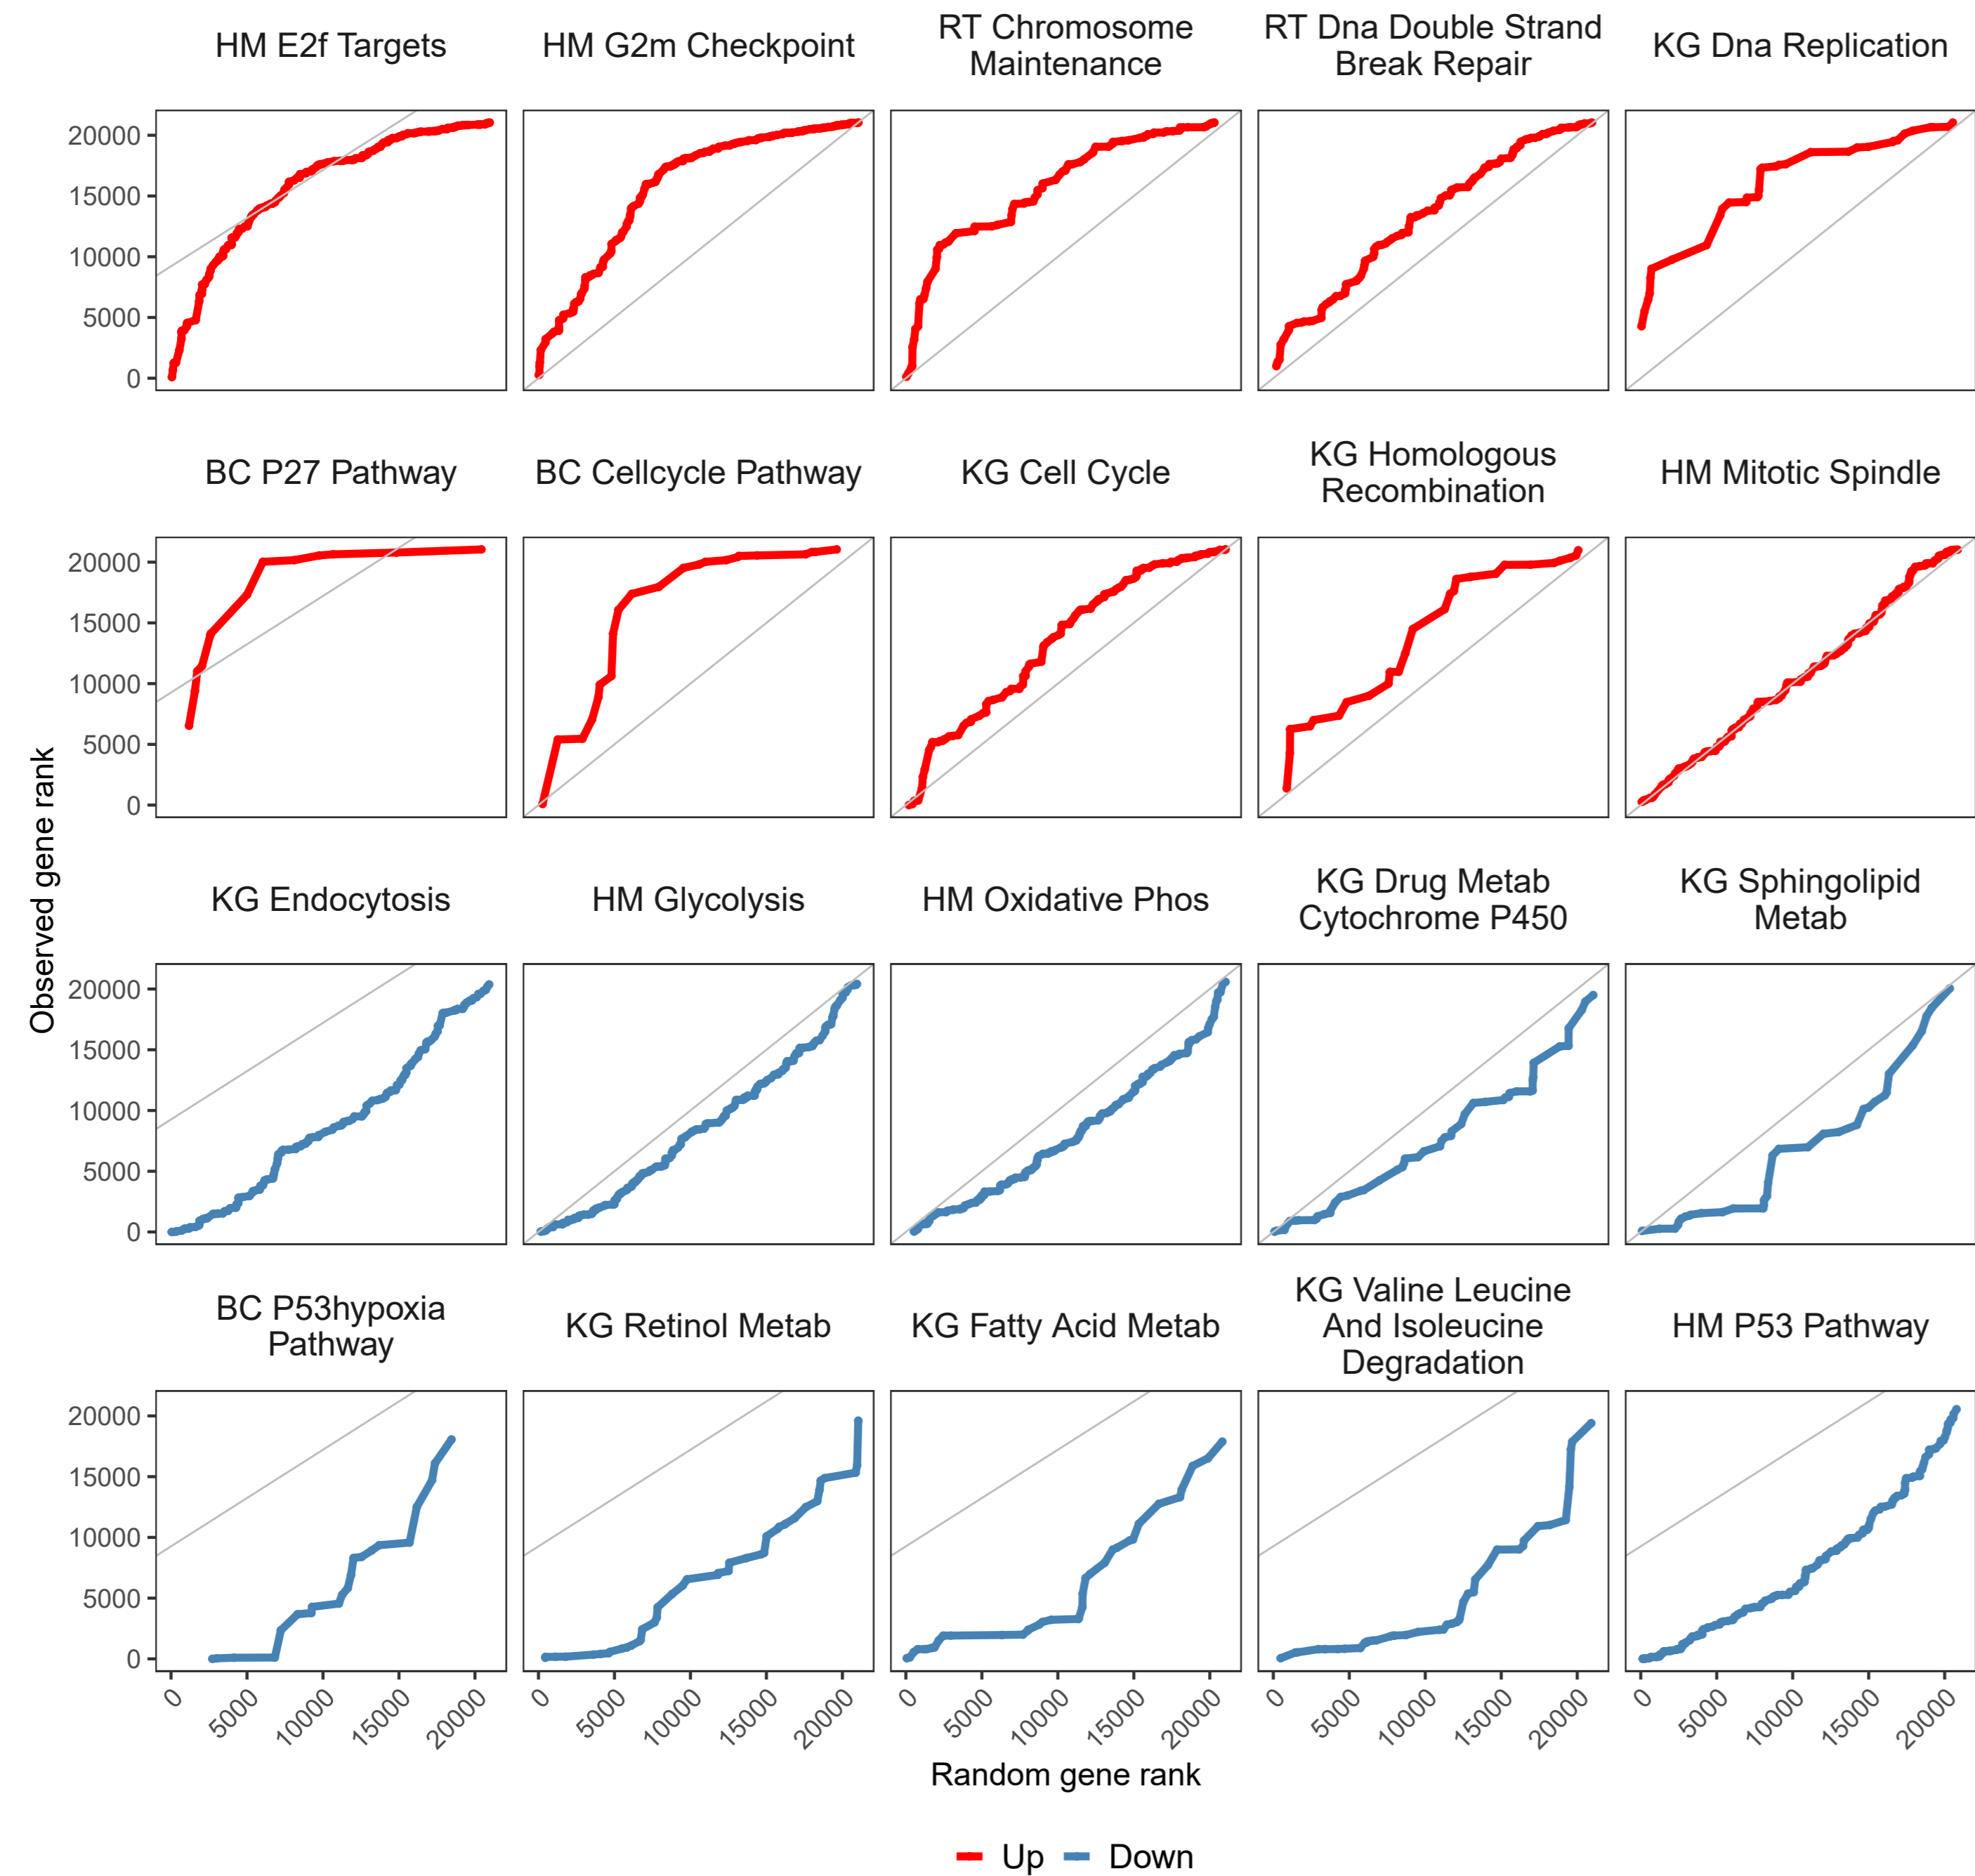

**B**

KRAS G13D / TP53 co-mutant vs KRAS G13D mutant COAD

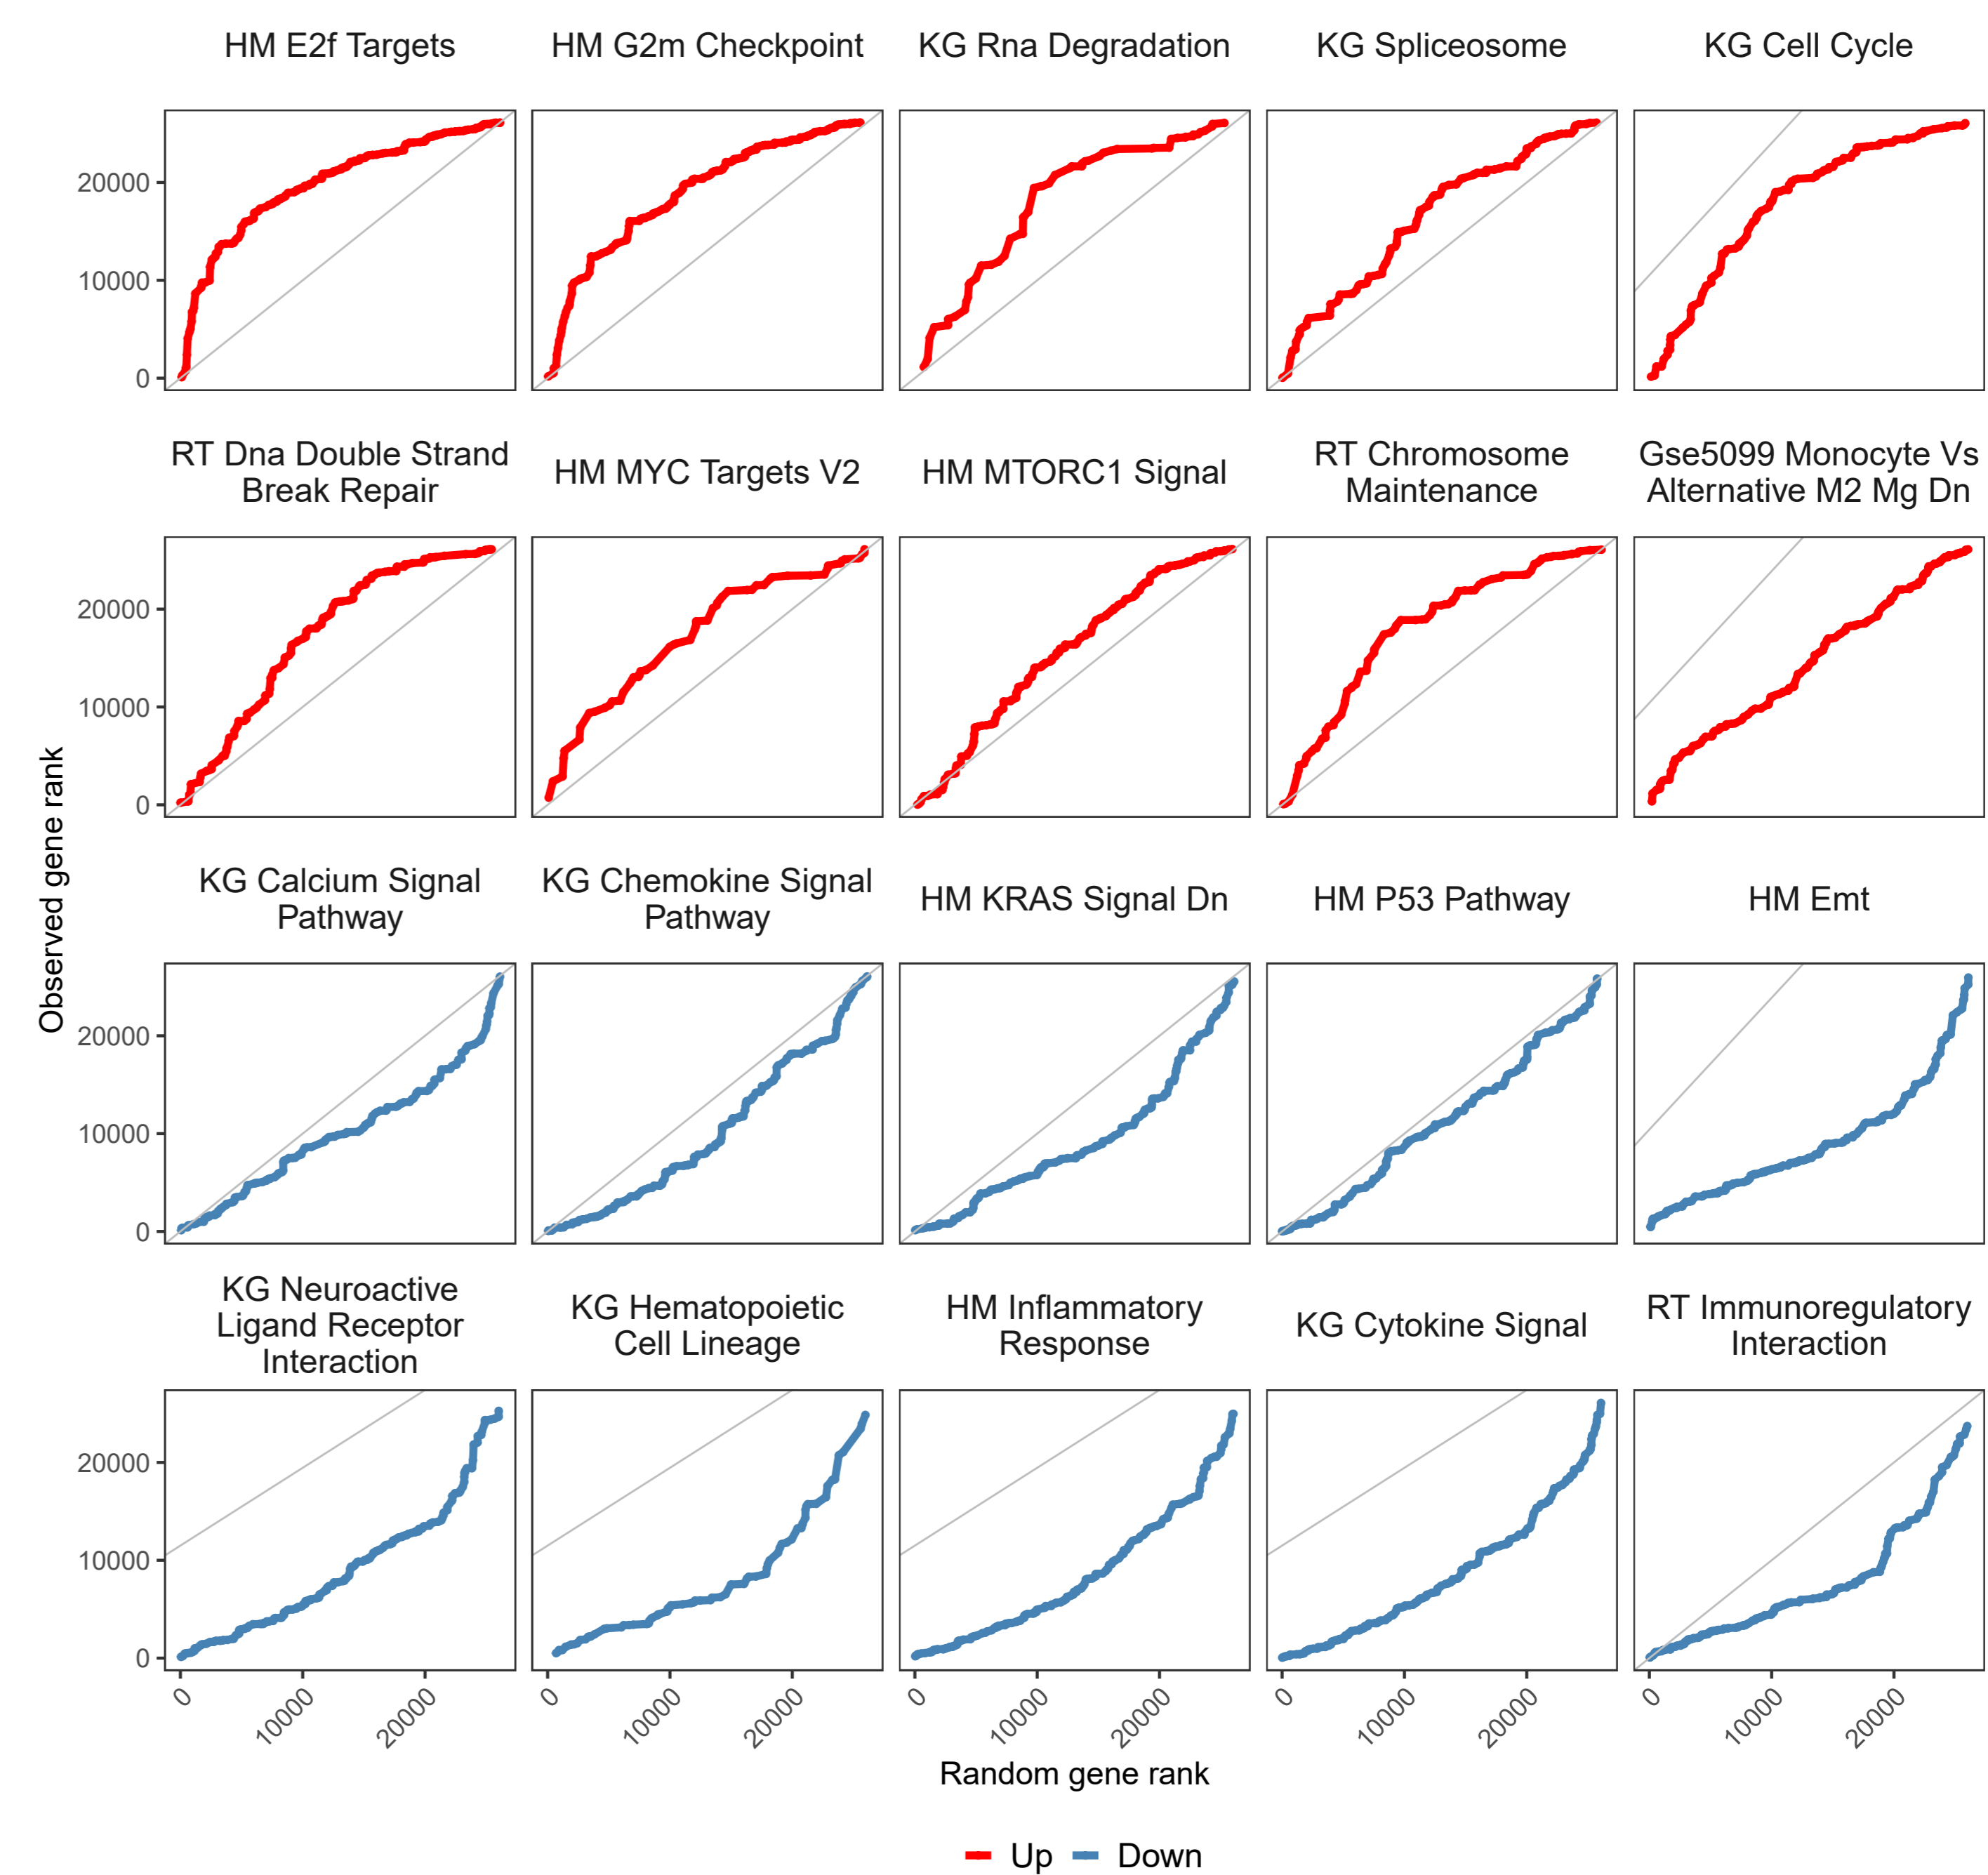

**C**

KRAS G12D / TP53 co-mutant vs KRAS G12D mutant PAAD

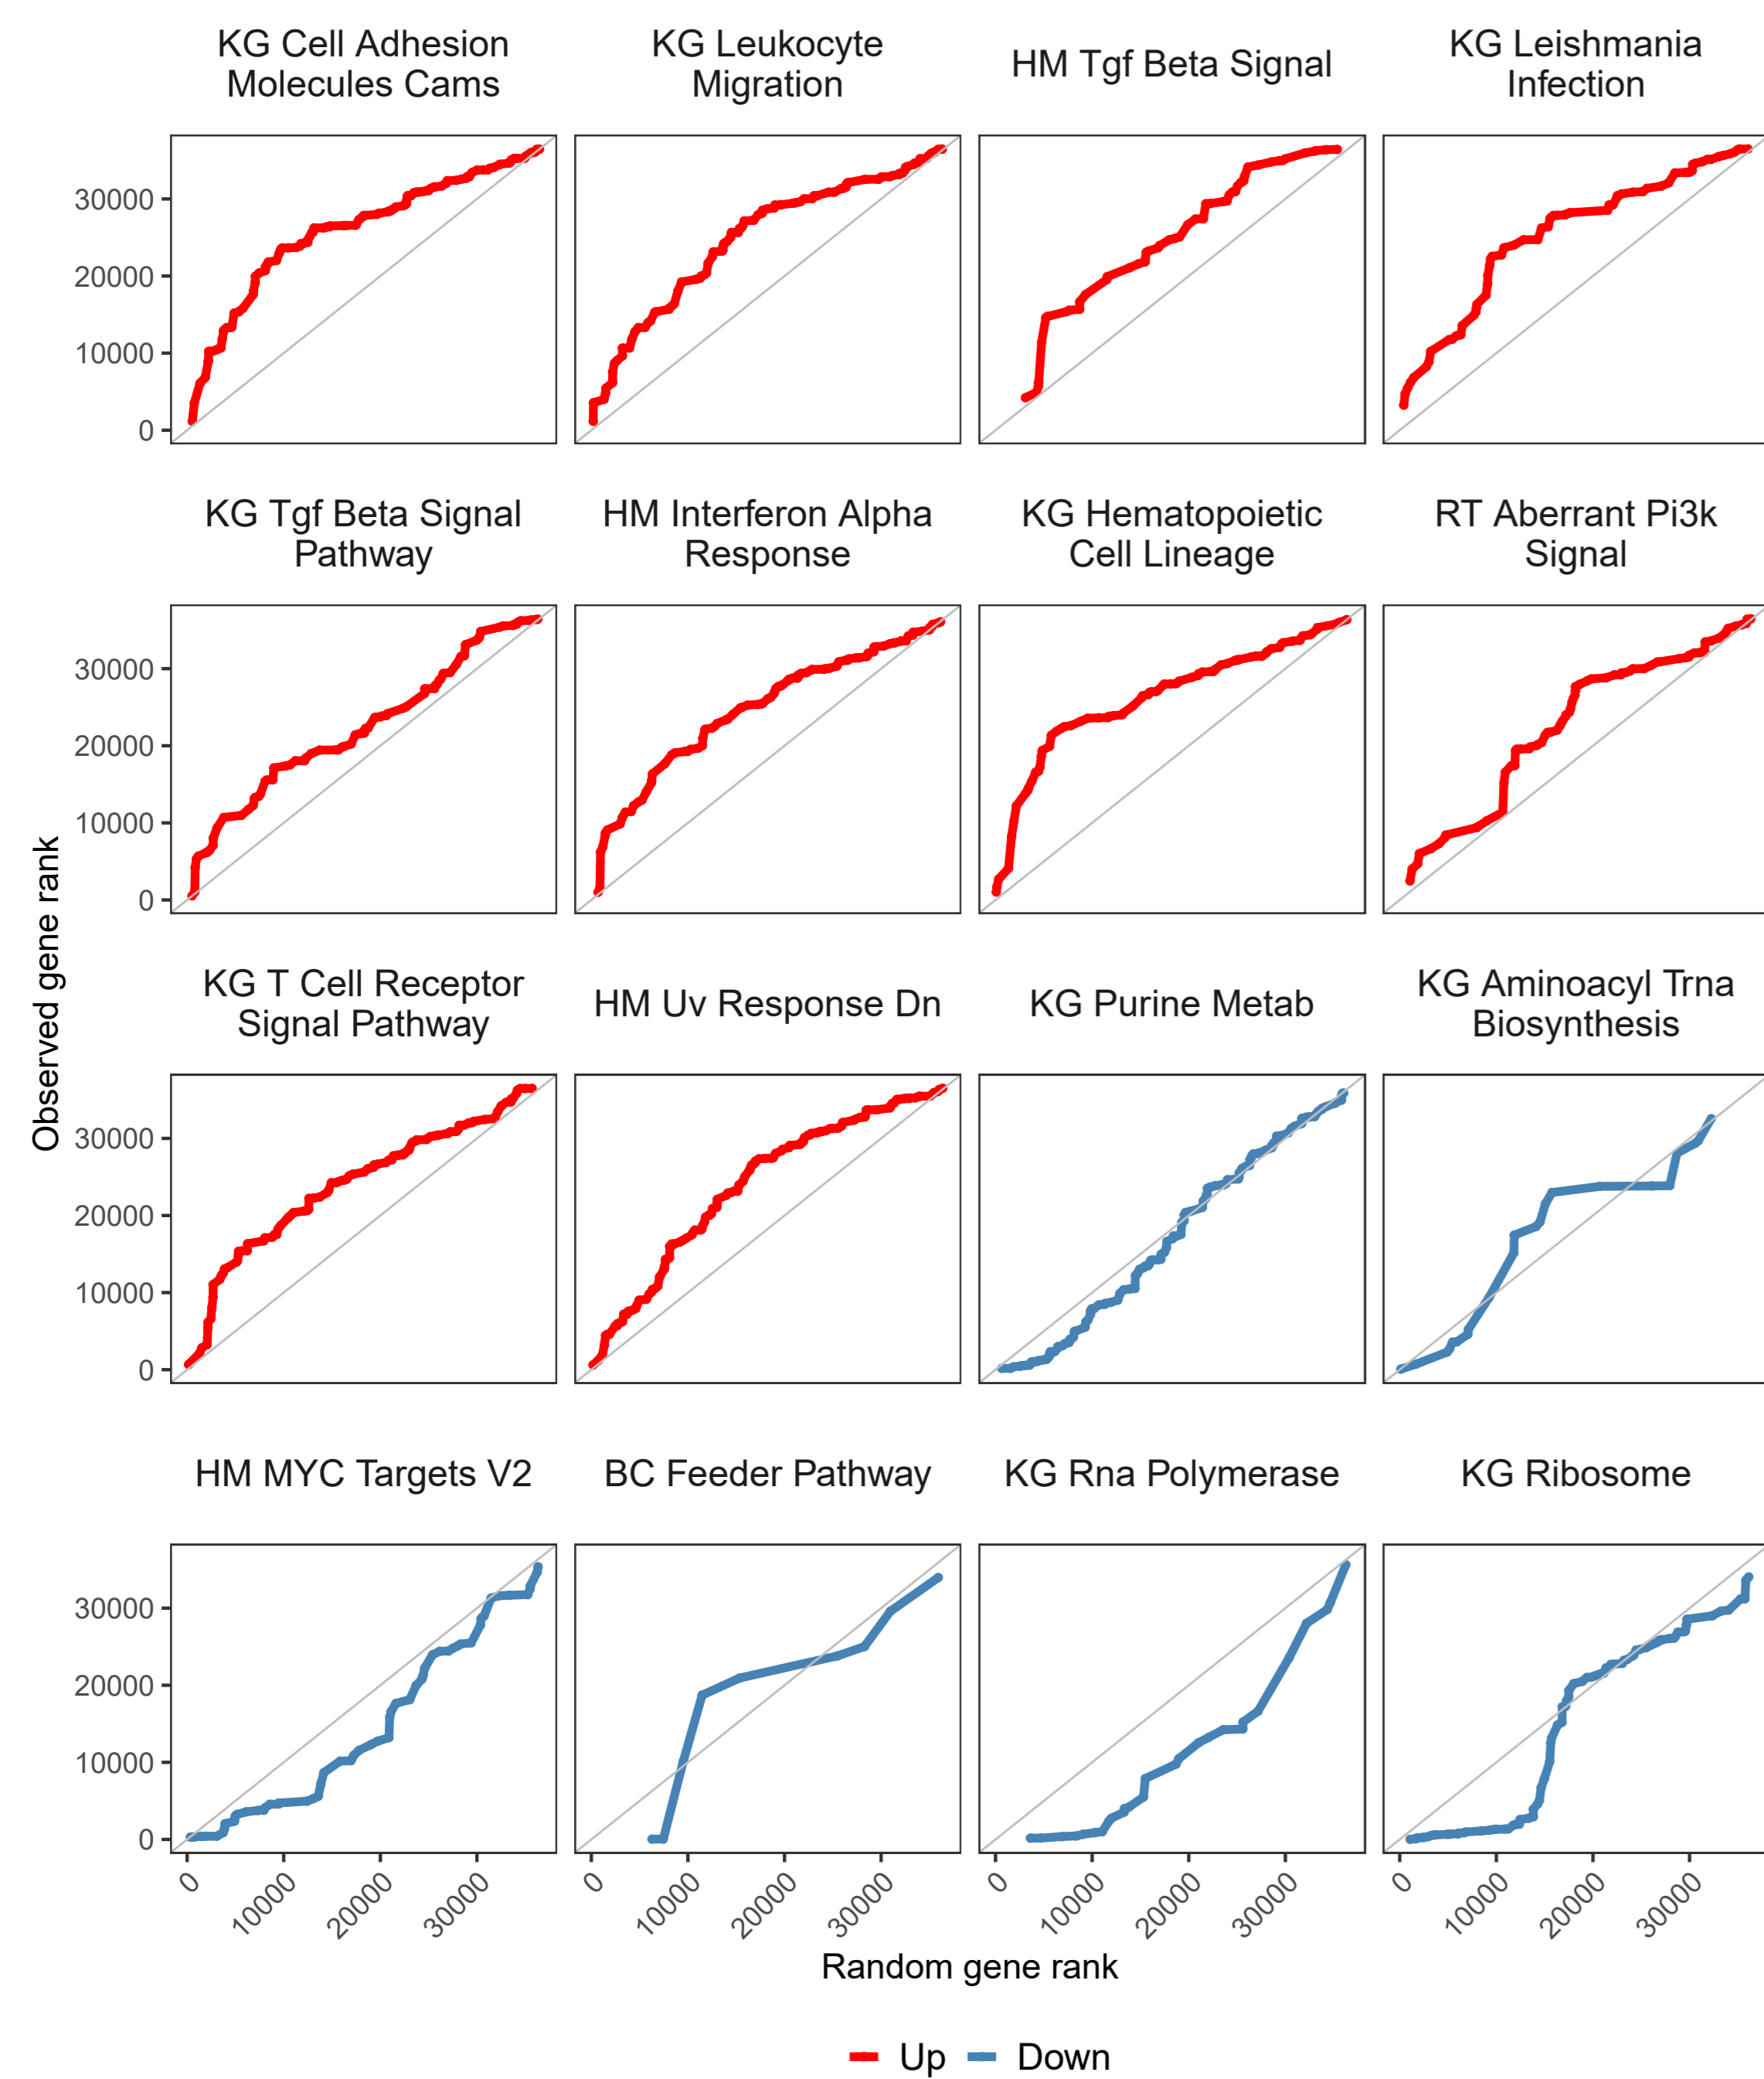

**D**

KRAS G12V / TP53 co-mutant vs KRAS G12V mutant PAAD

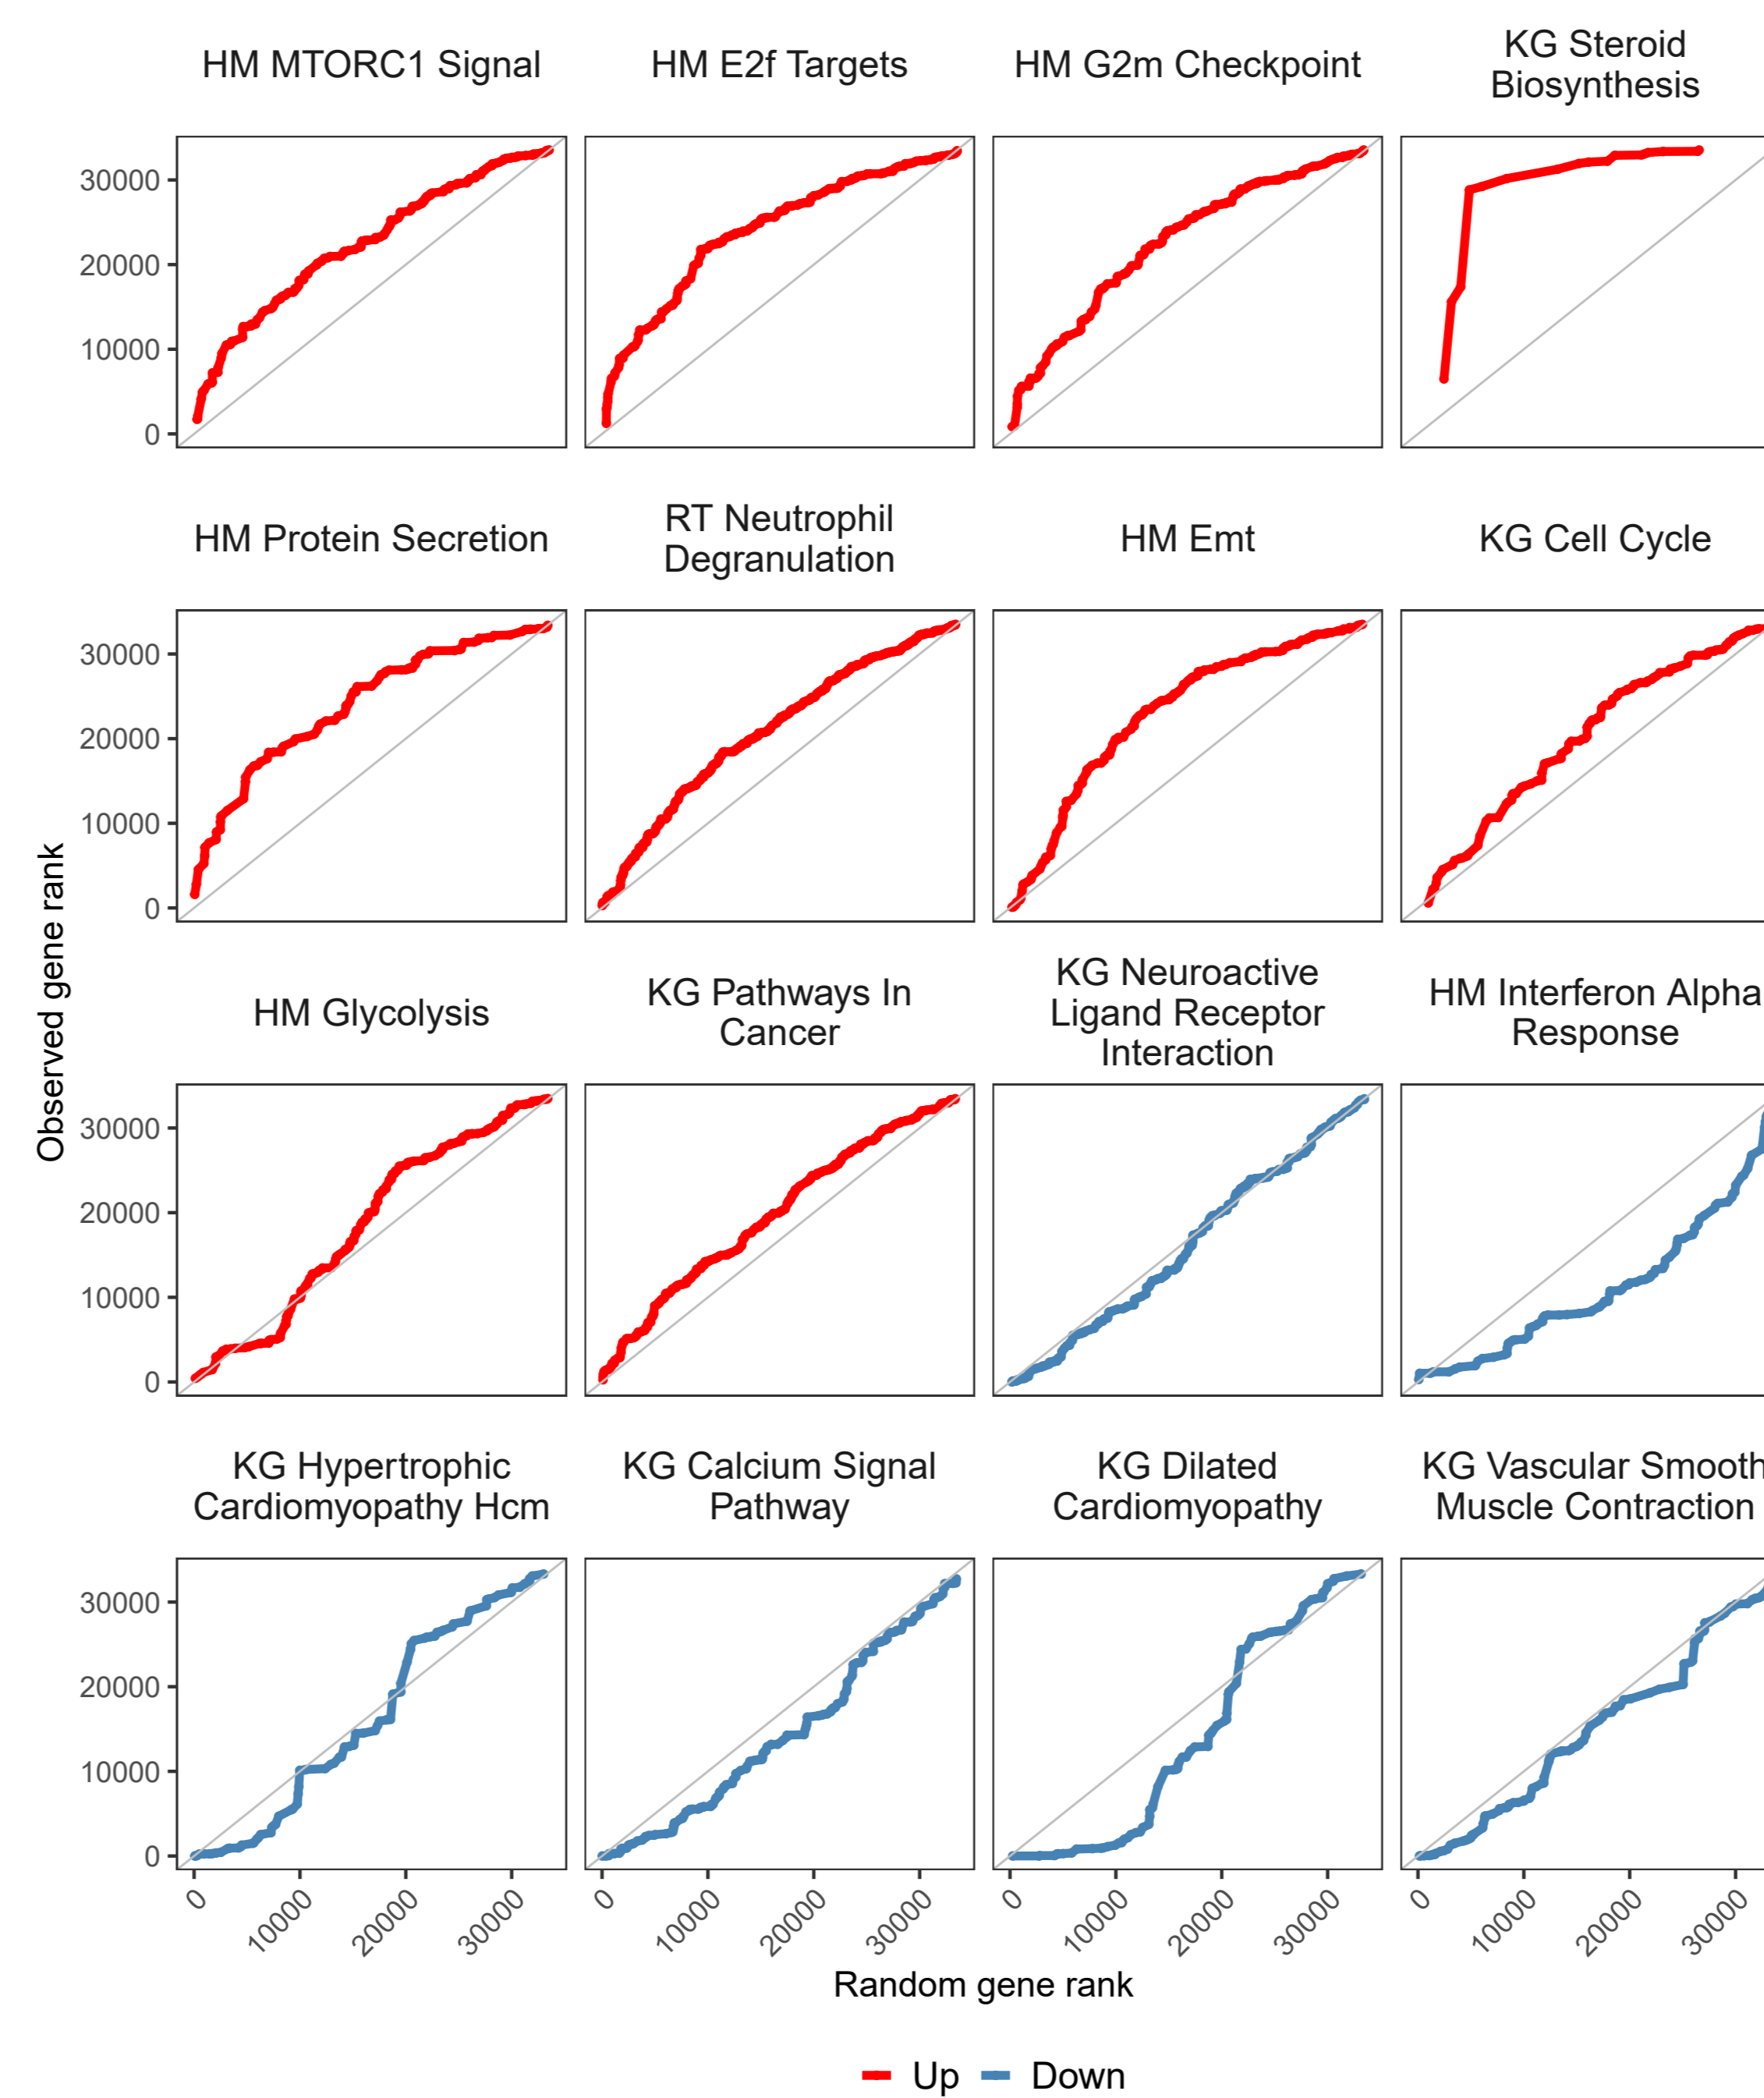

**E**

KRAS G12R / TP53 co-mutant vs KRAS G12R mutant PAAD

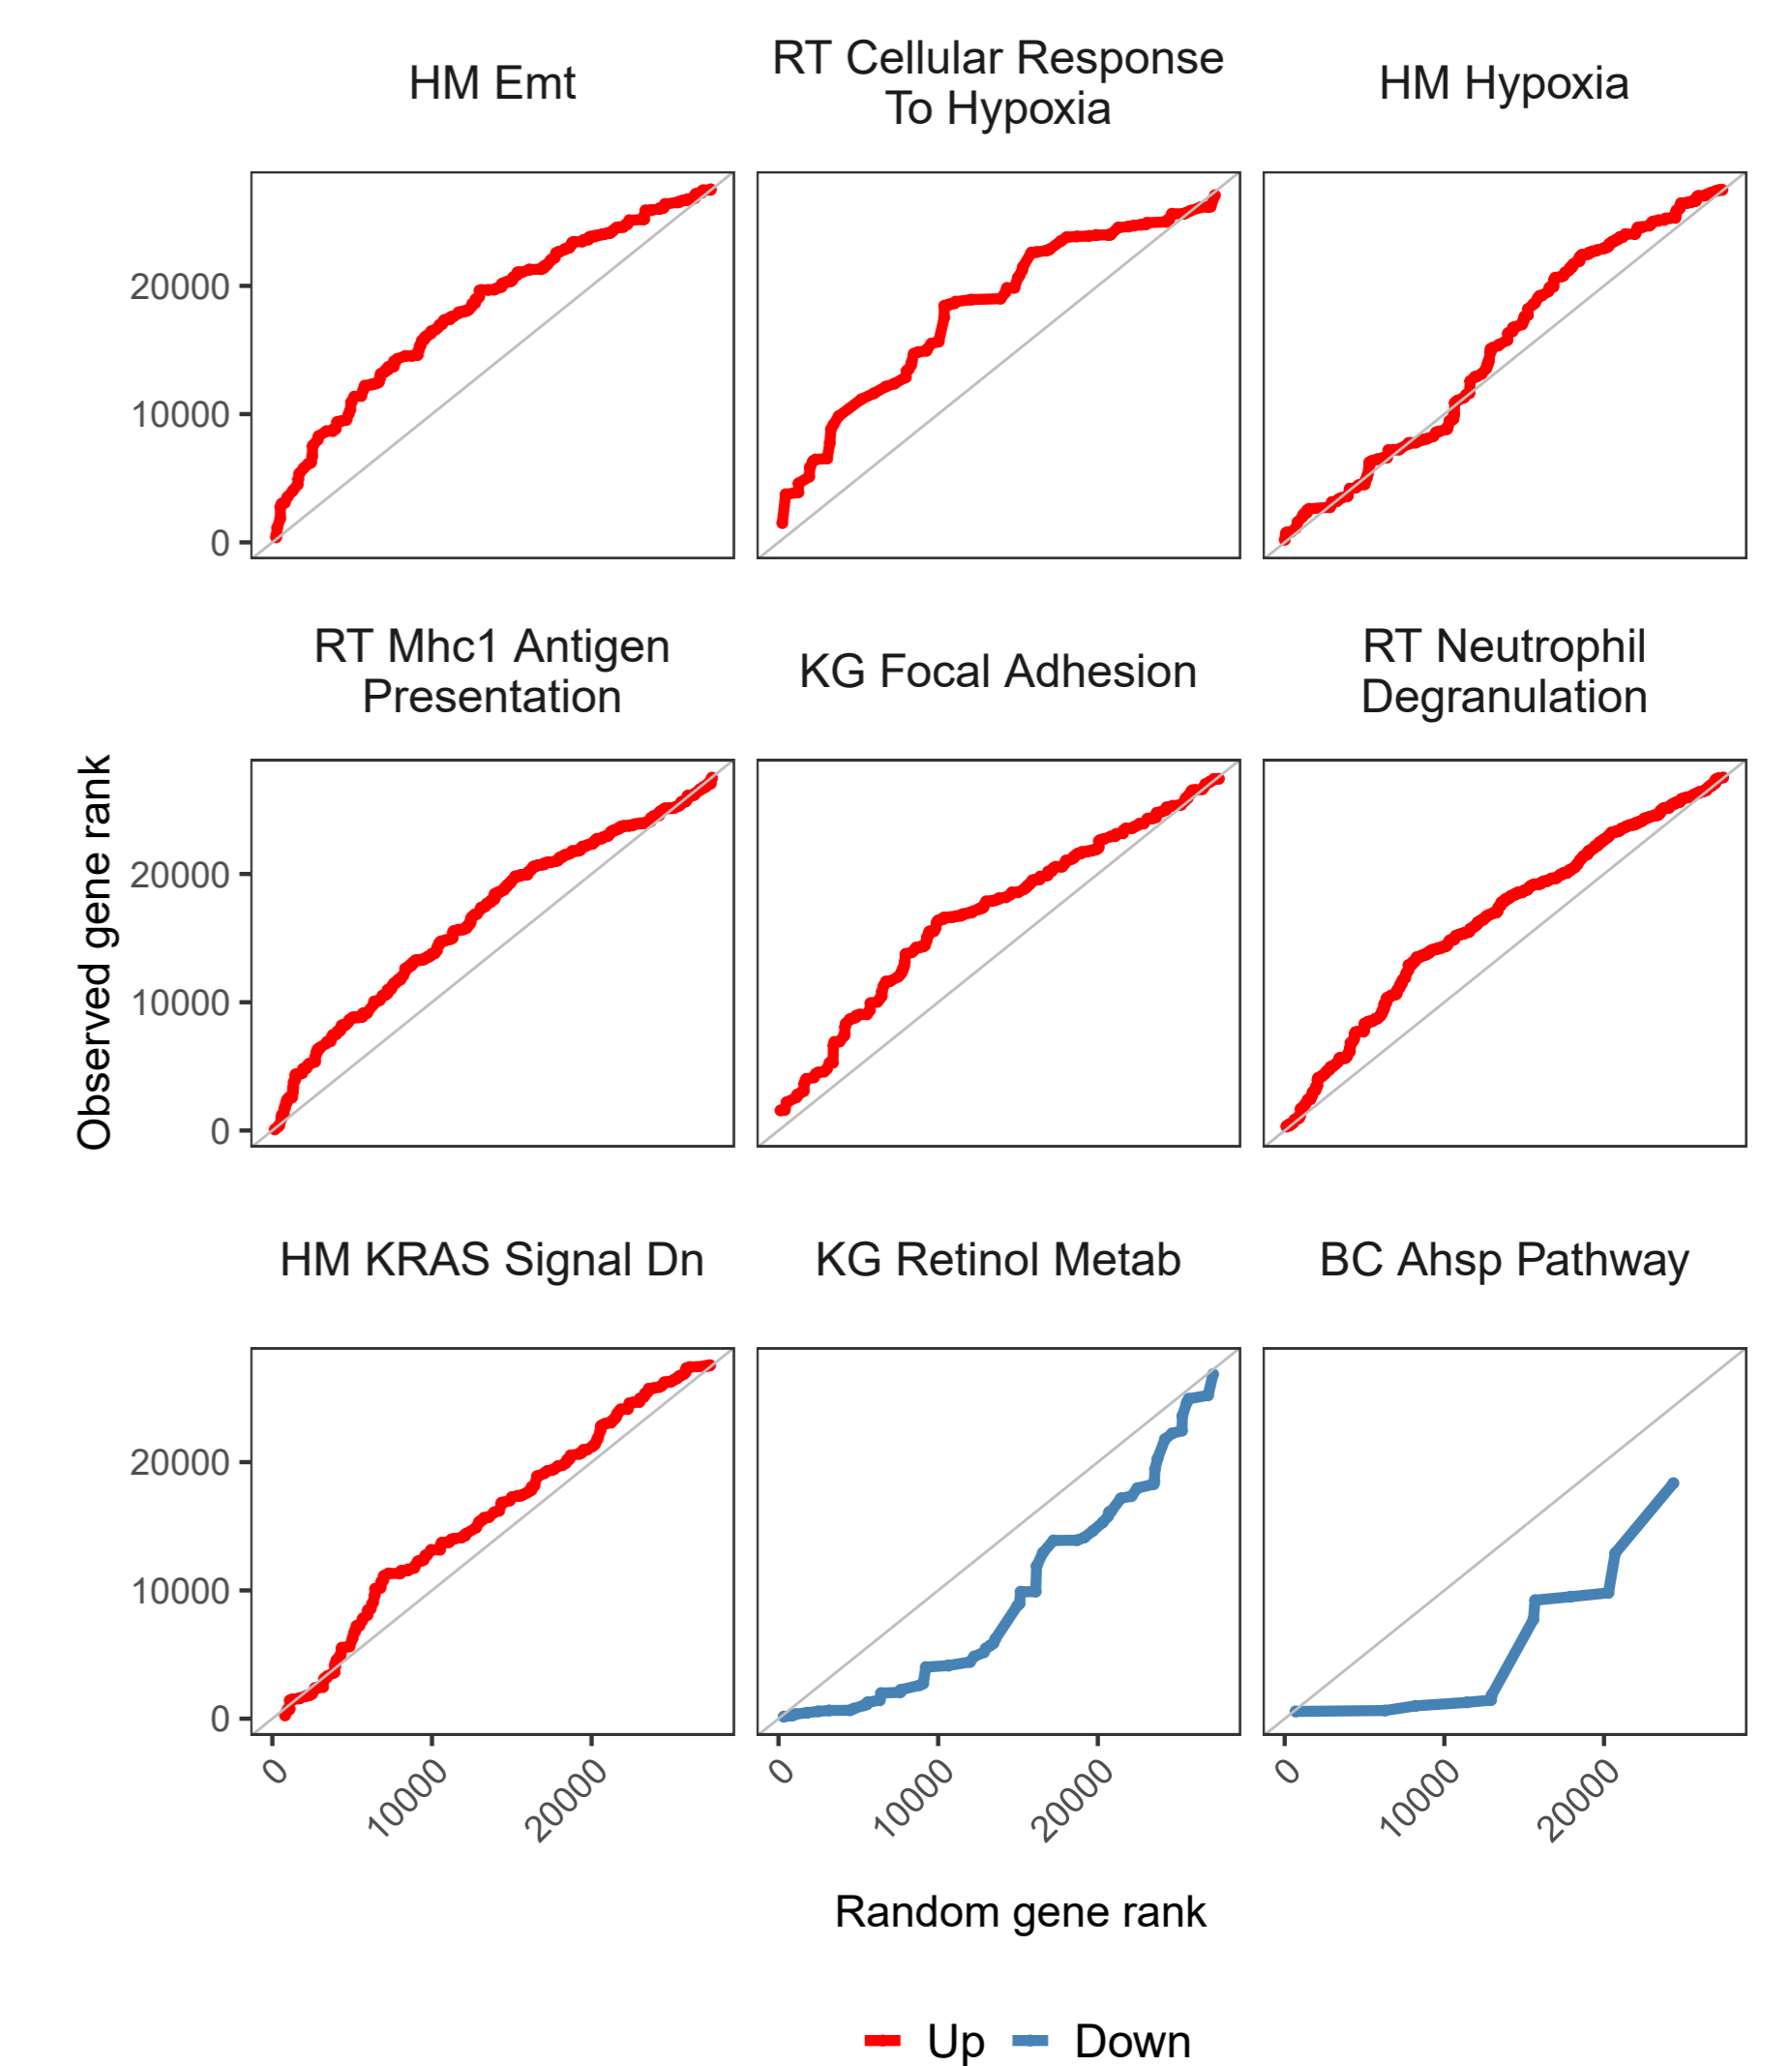

Supplement: can-22-1731_supplementary_fig.s20_supp20.pdf [file can-22-1731_supplementary_fig.s20_supp20.pdf]
