# Supplementary material for: Genomic Landscapes and Hallmarks of Mutant RAS in Human Cancers
Source: PubMed Central journal article supplement — Cancer Res. 2022 Sep 8;82(21):4058–78. doi: 10.1158/0008-5472.CAN-22-1731 (PMC9627127; doi:10.1158/0008-5472.can-22-1731), 2022-09-08

# Supplementary Figure S22

## A Chromatin only mutant vs wild type PAAD

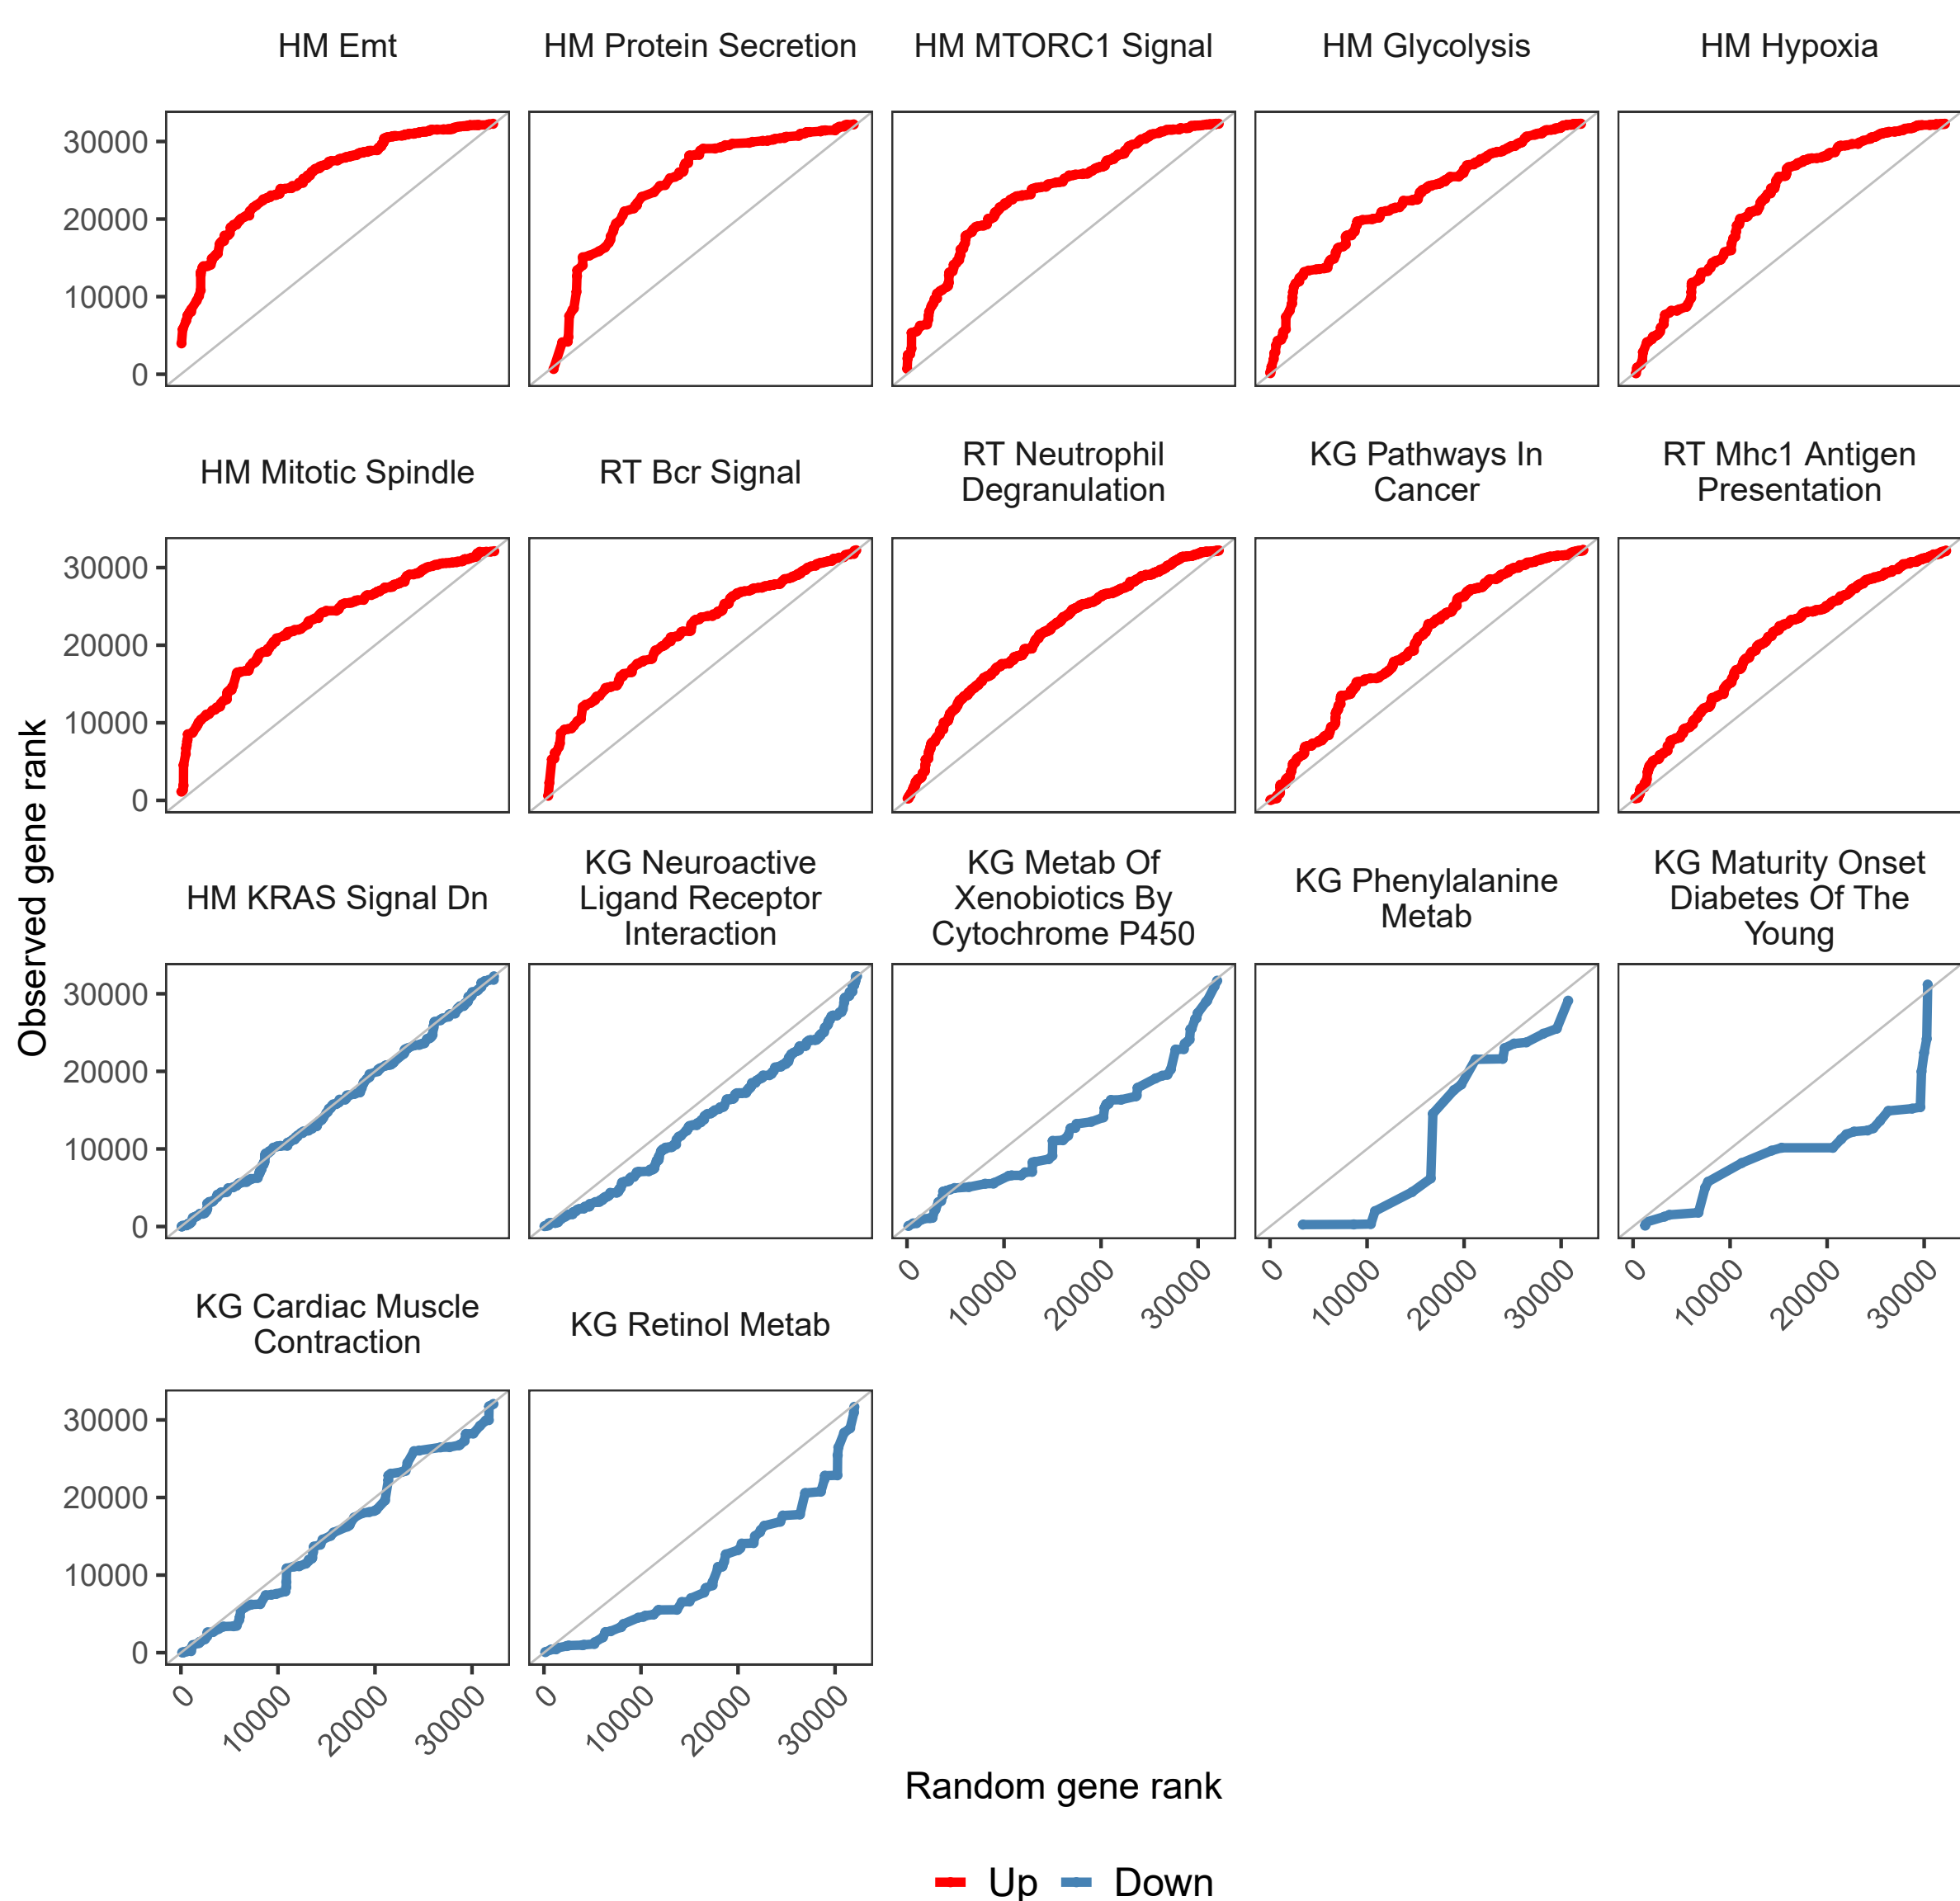

## B MAPK only mutant vs wild type PAAD

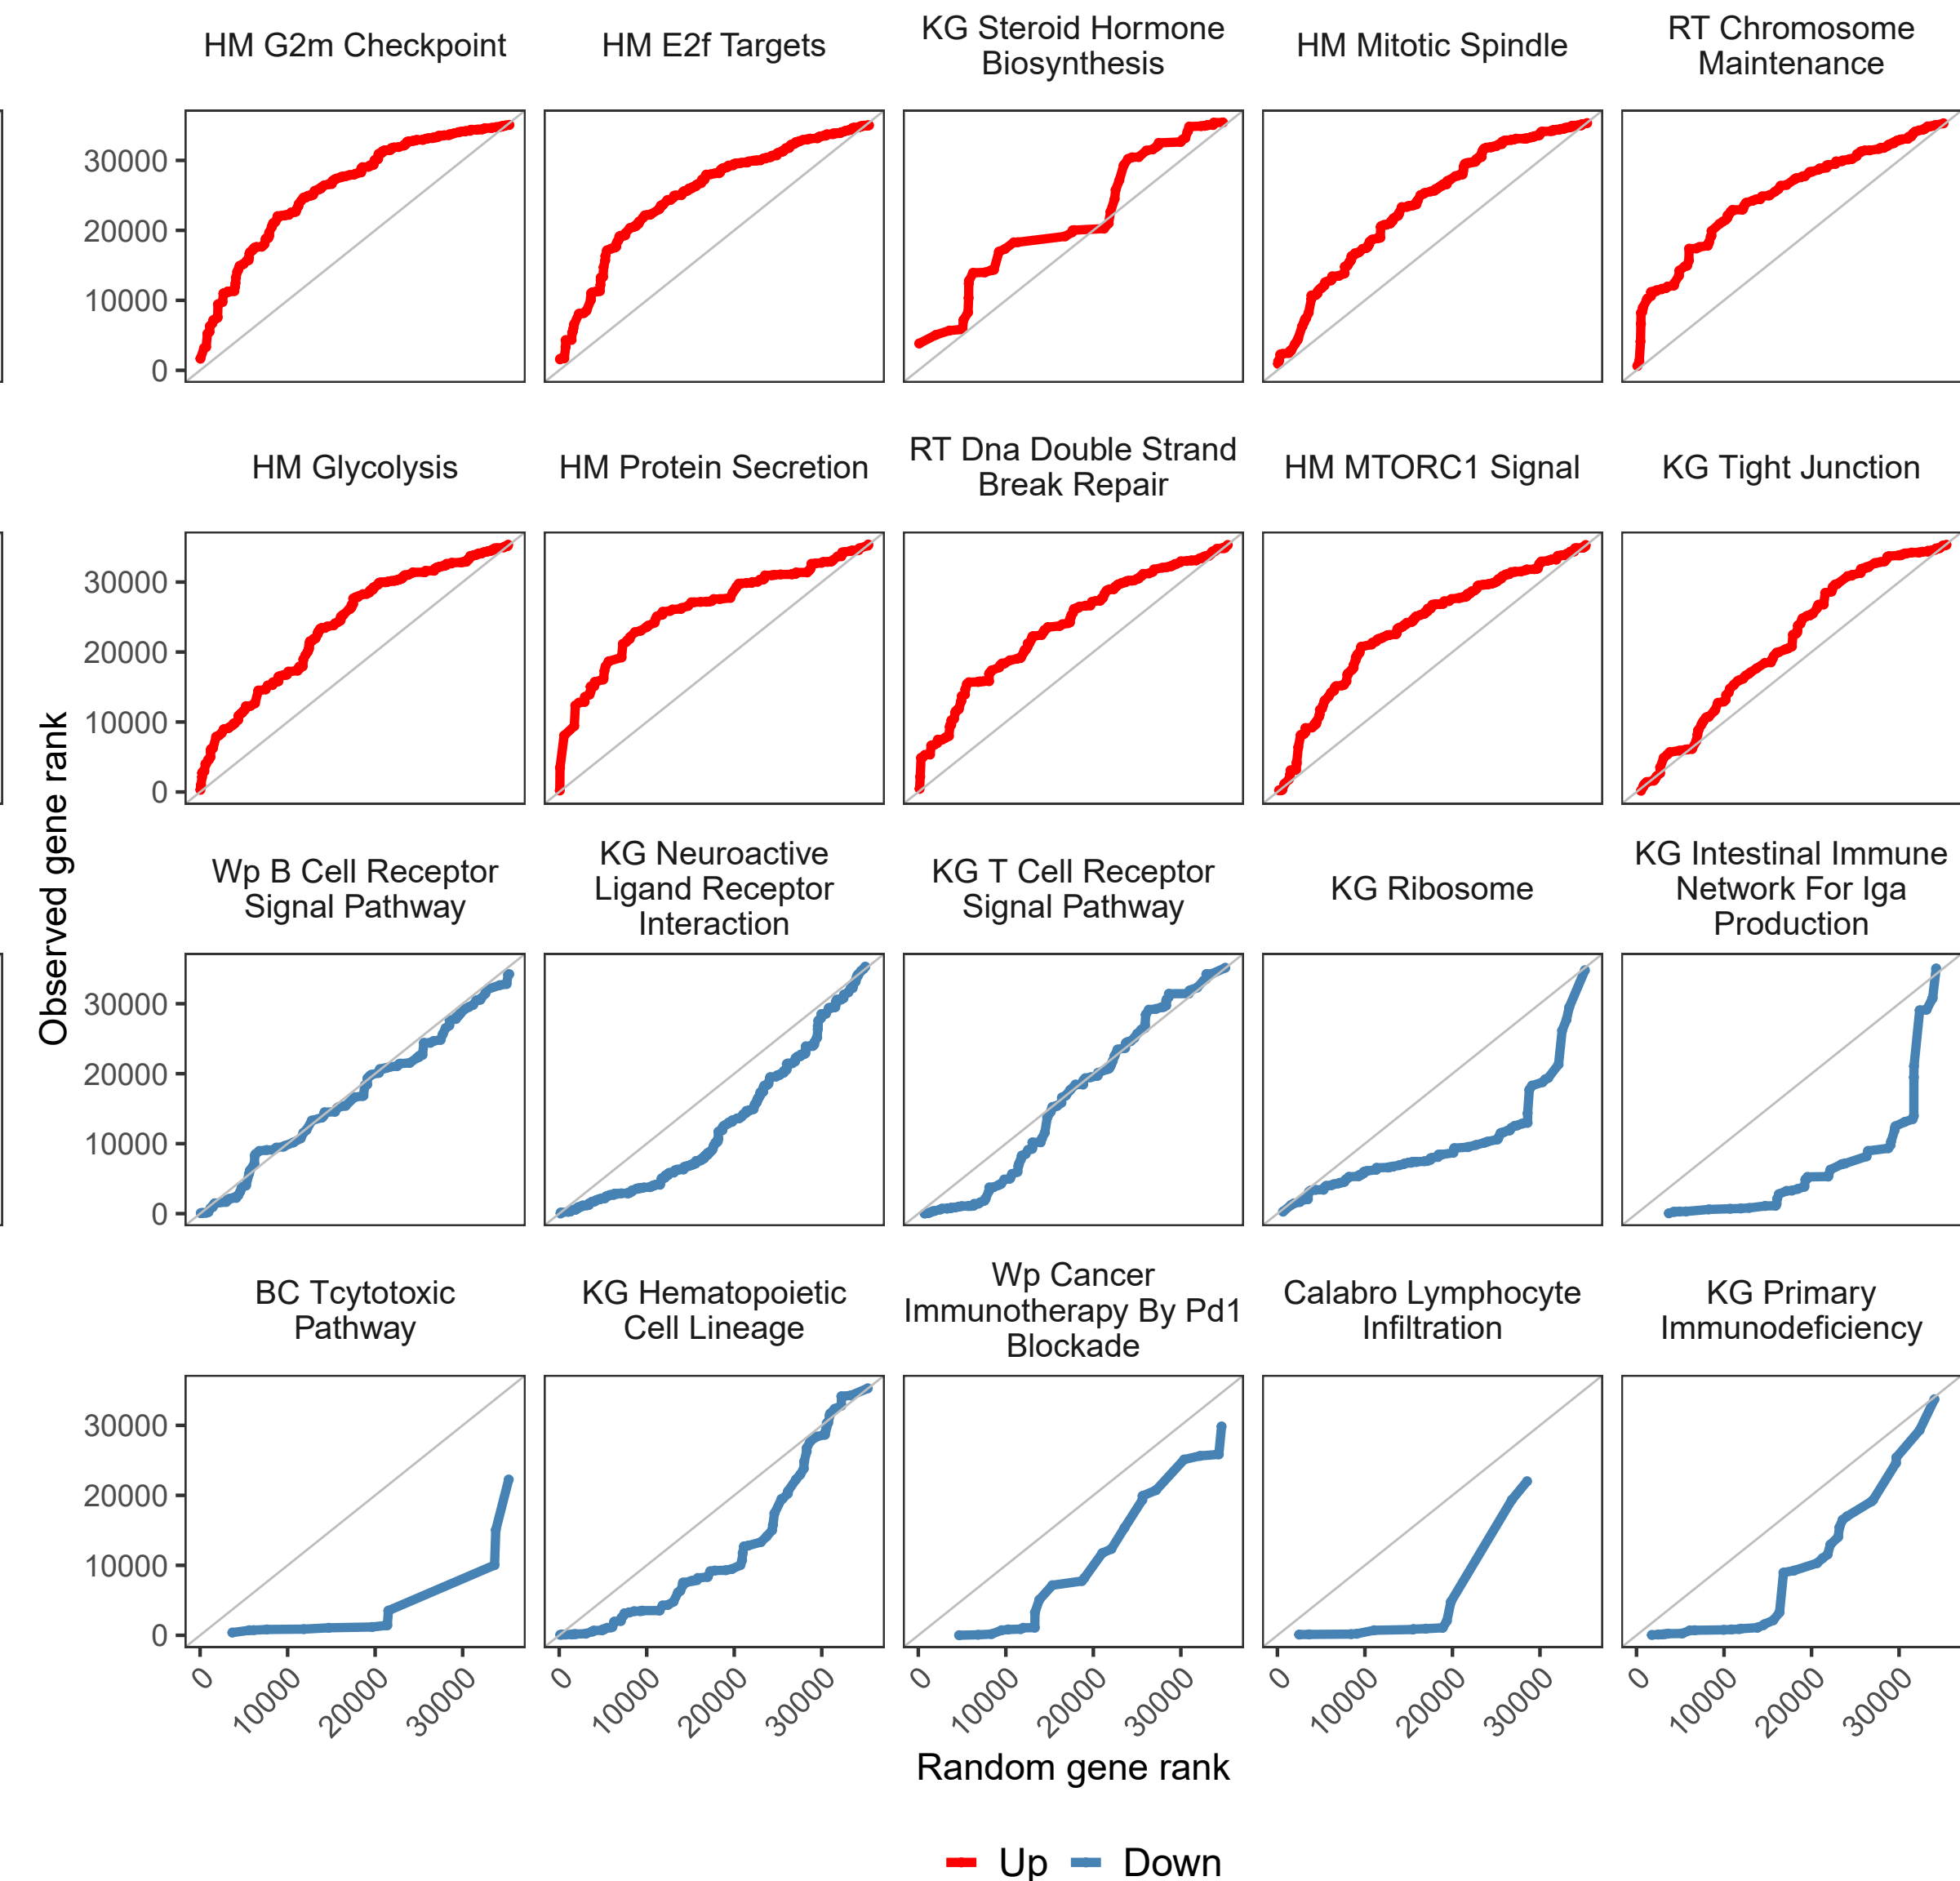

## C SMAD4 only mutant vs wild type PAAD

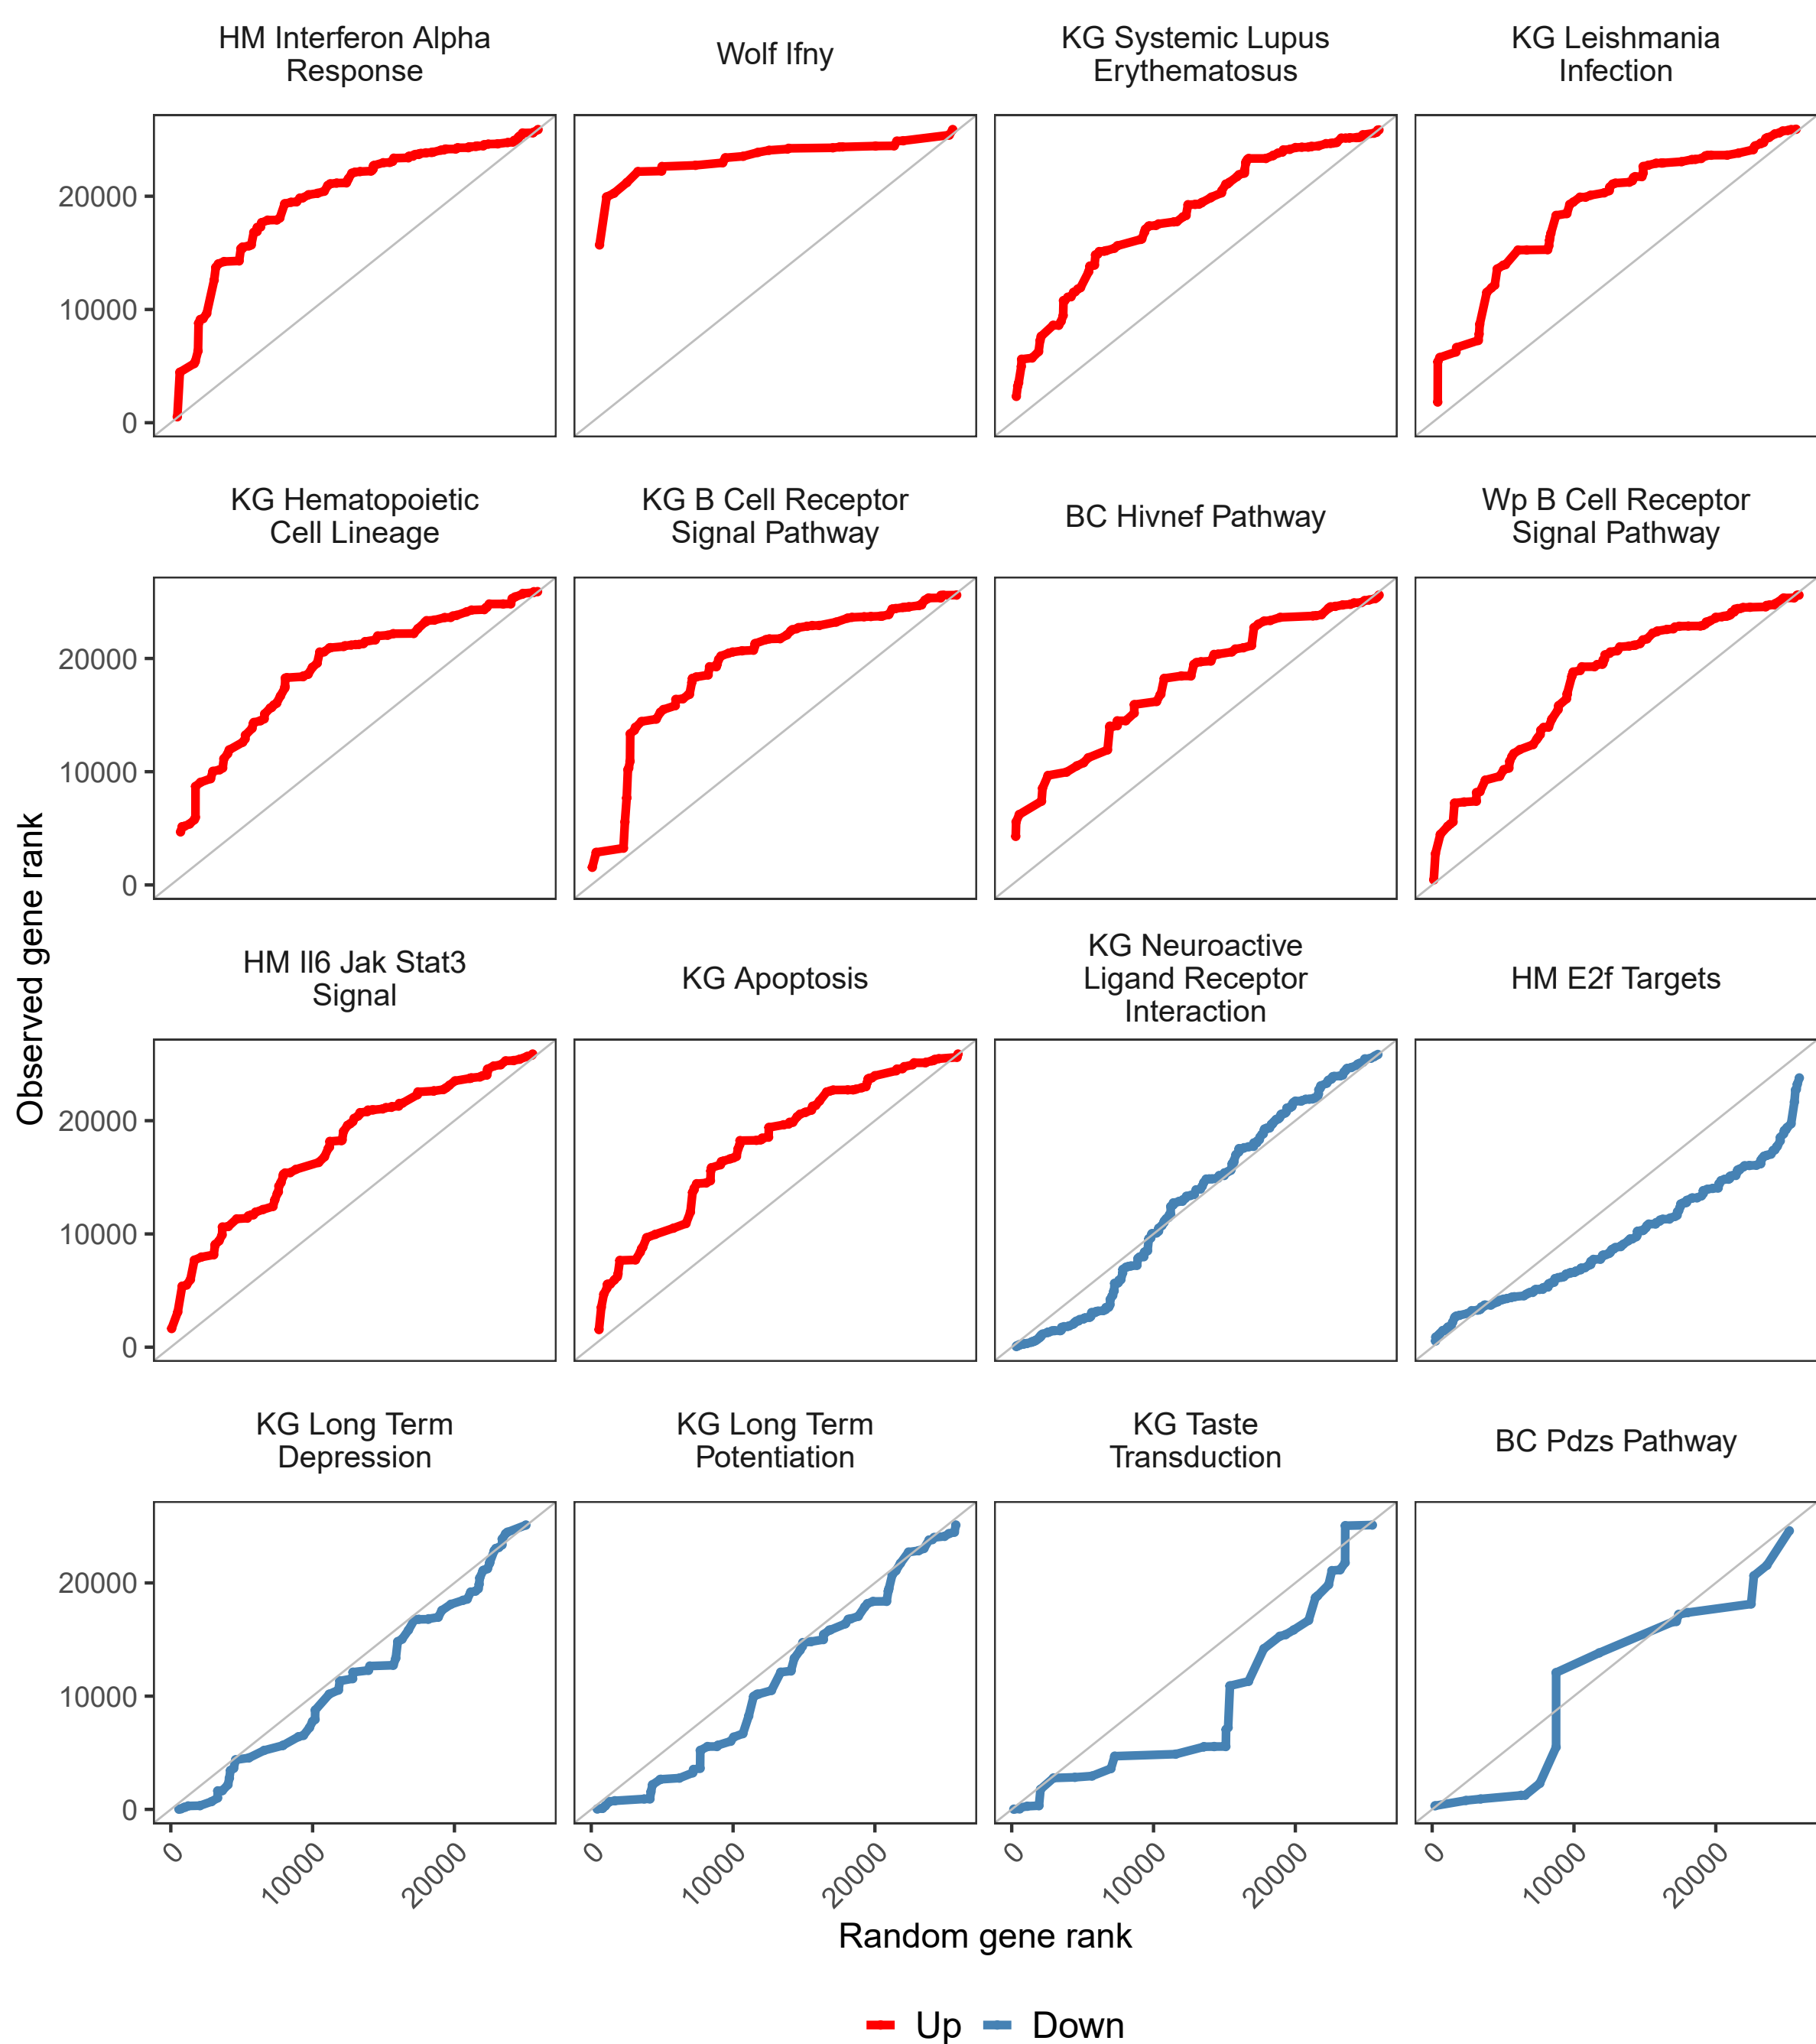

## D TP53 only mutant vs wild type PAAD

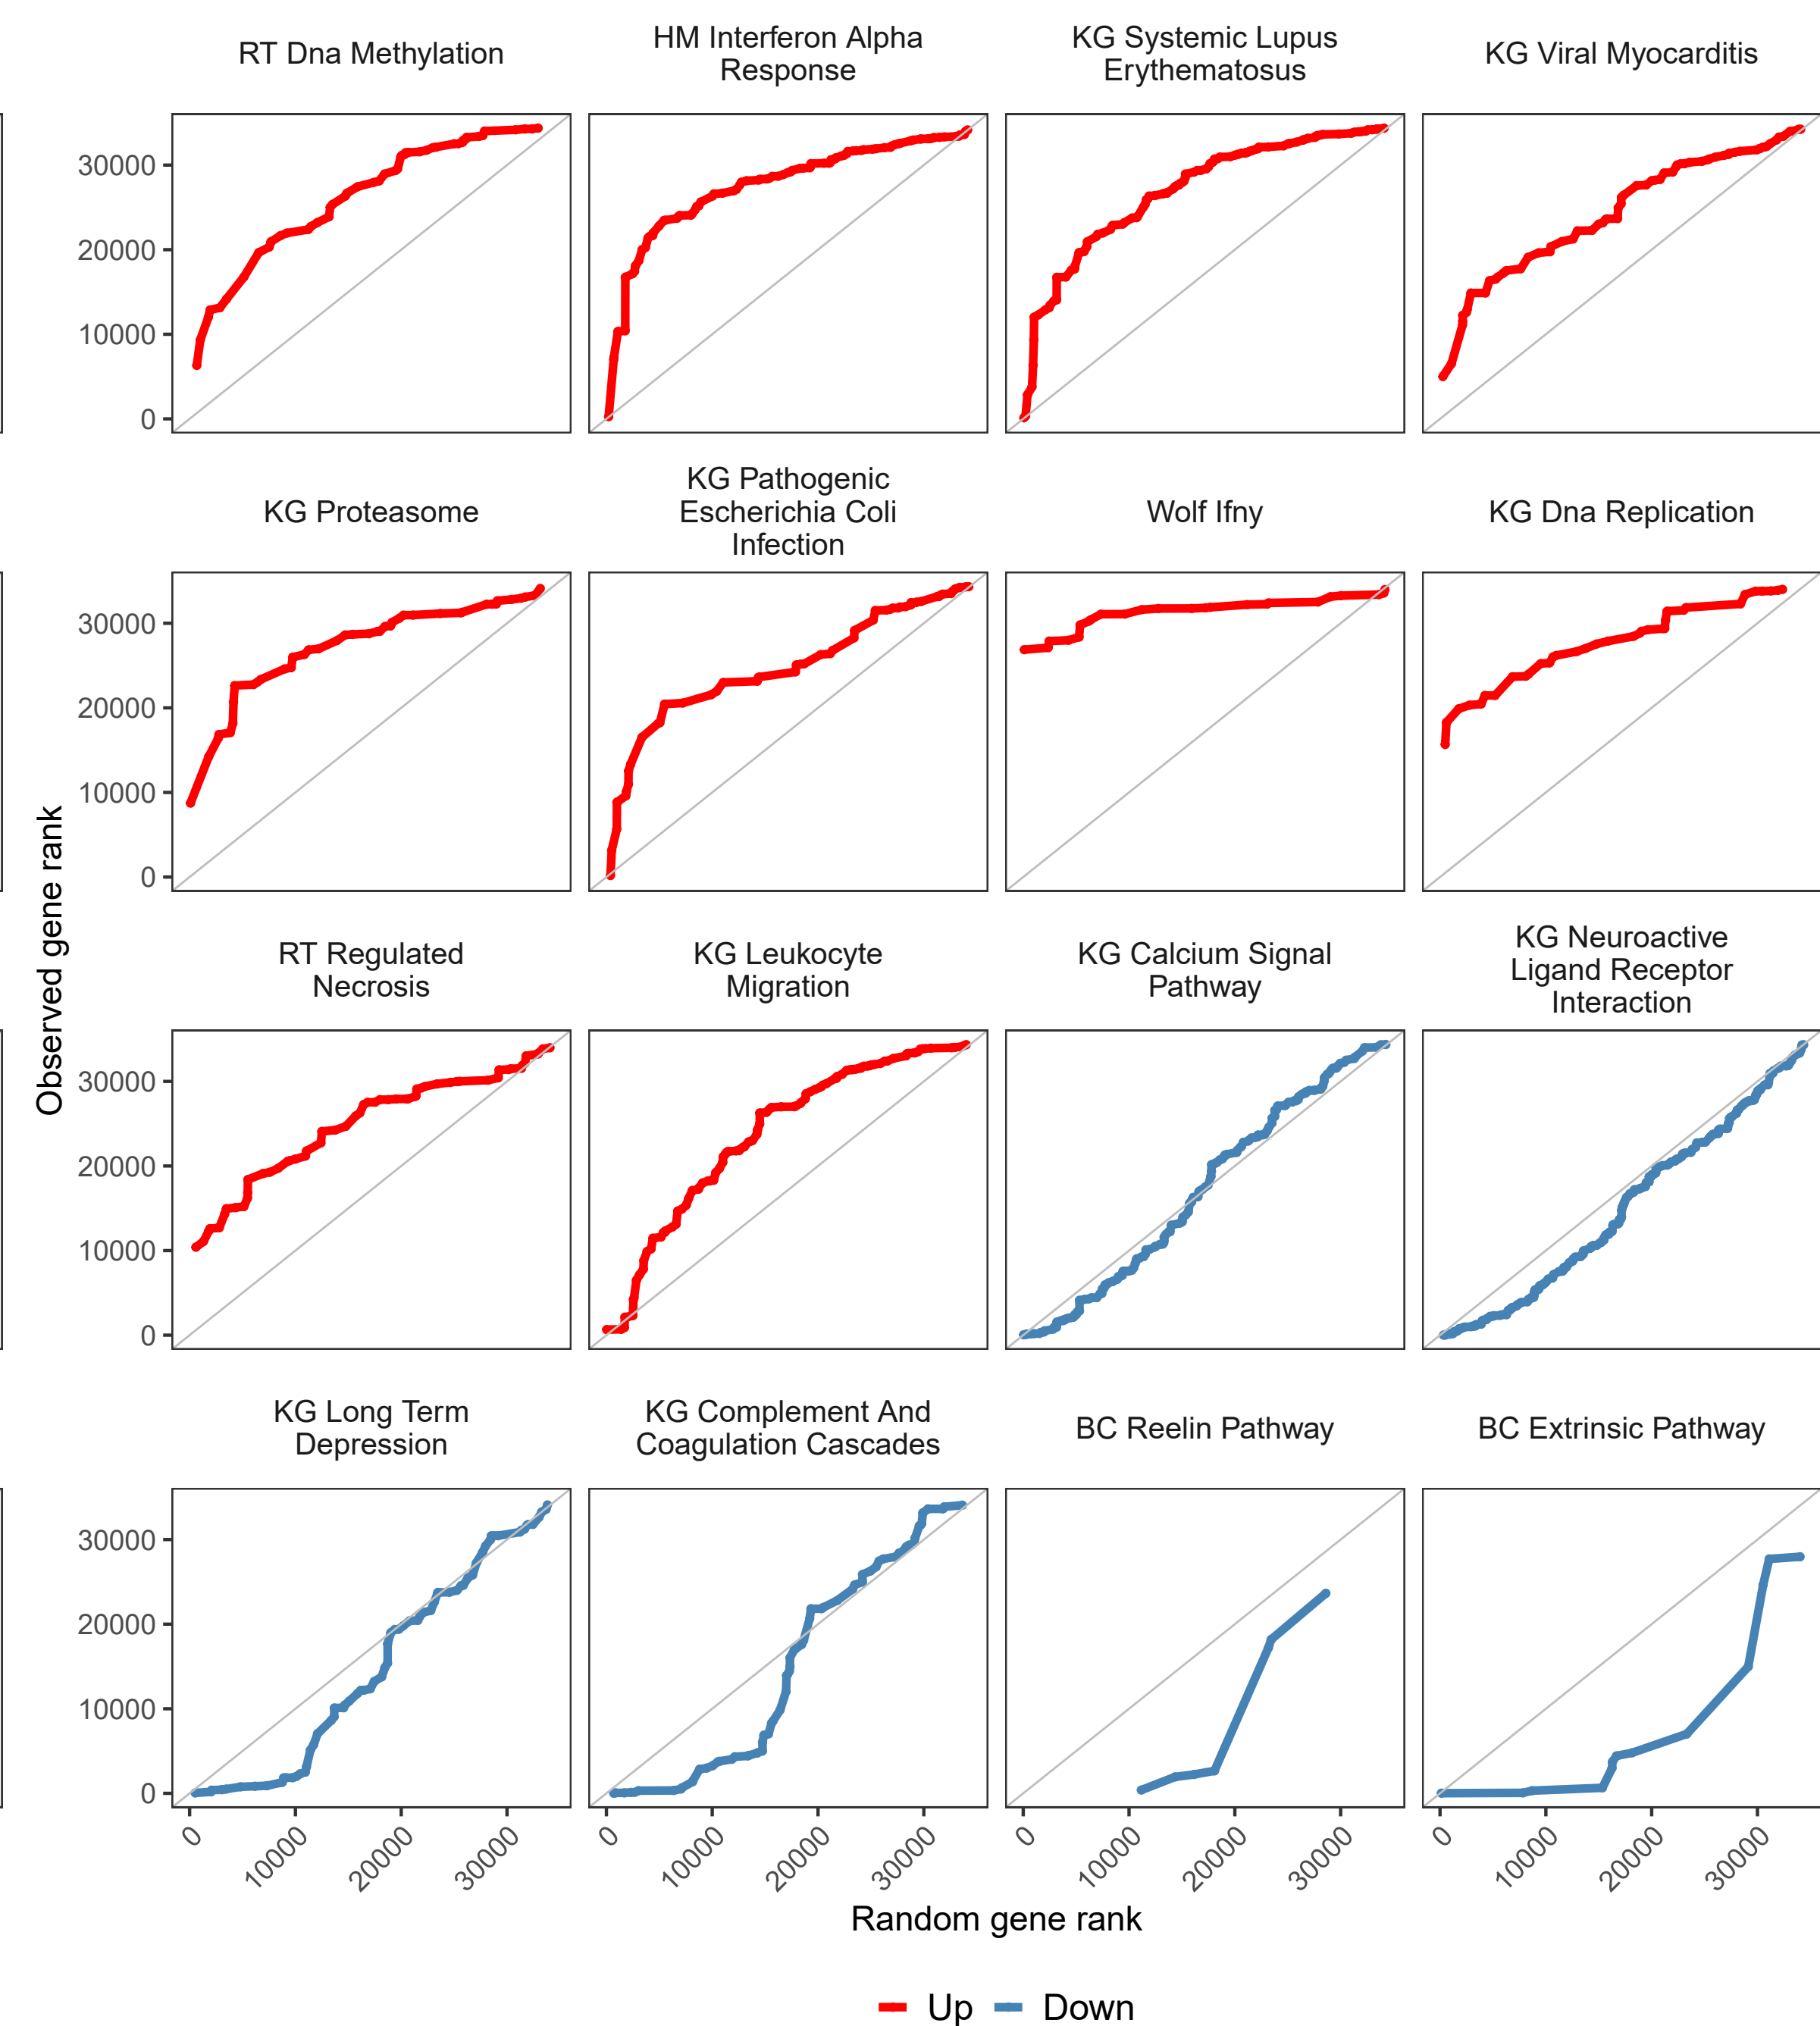

Supplement: can-22-1731_supplementary_fig.s22_supp22.pdf [file can-22-1731_supplementary_fig.s22_supp22.pdf]
