# Supplementary figures and images for: Genomic Landscapes and Hallmarks of Mutant RAS in Human Cancers
Source: PubMed Central journal article supplement — Cancer Res. 2022 Sep 8;82(21):4058–78. doi: 10.1158/0008-5472.CAN-22-1731 (PMC9627127; doi:10.1158/0008-5472.can-22-1731), 2022-09-08

# Supplementary Figure S10

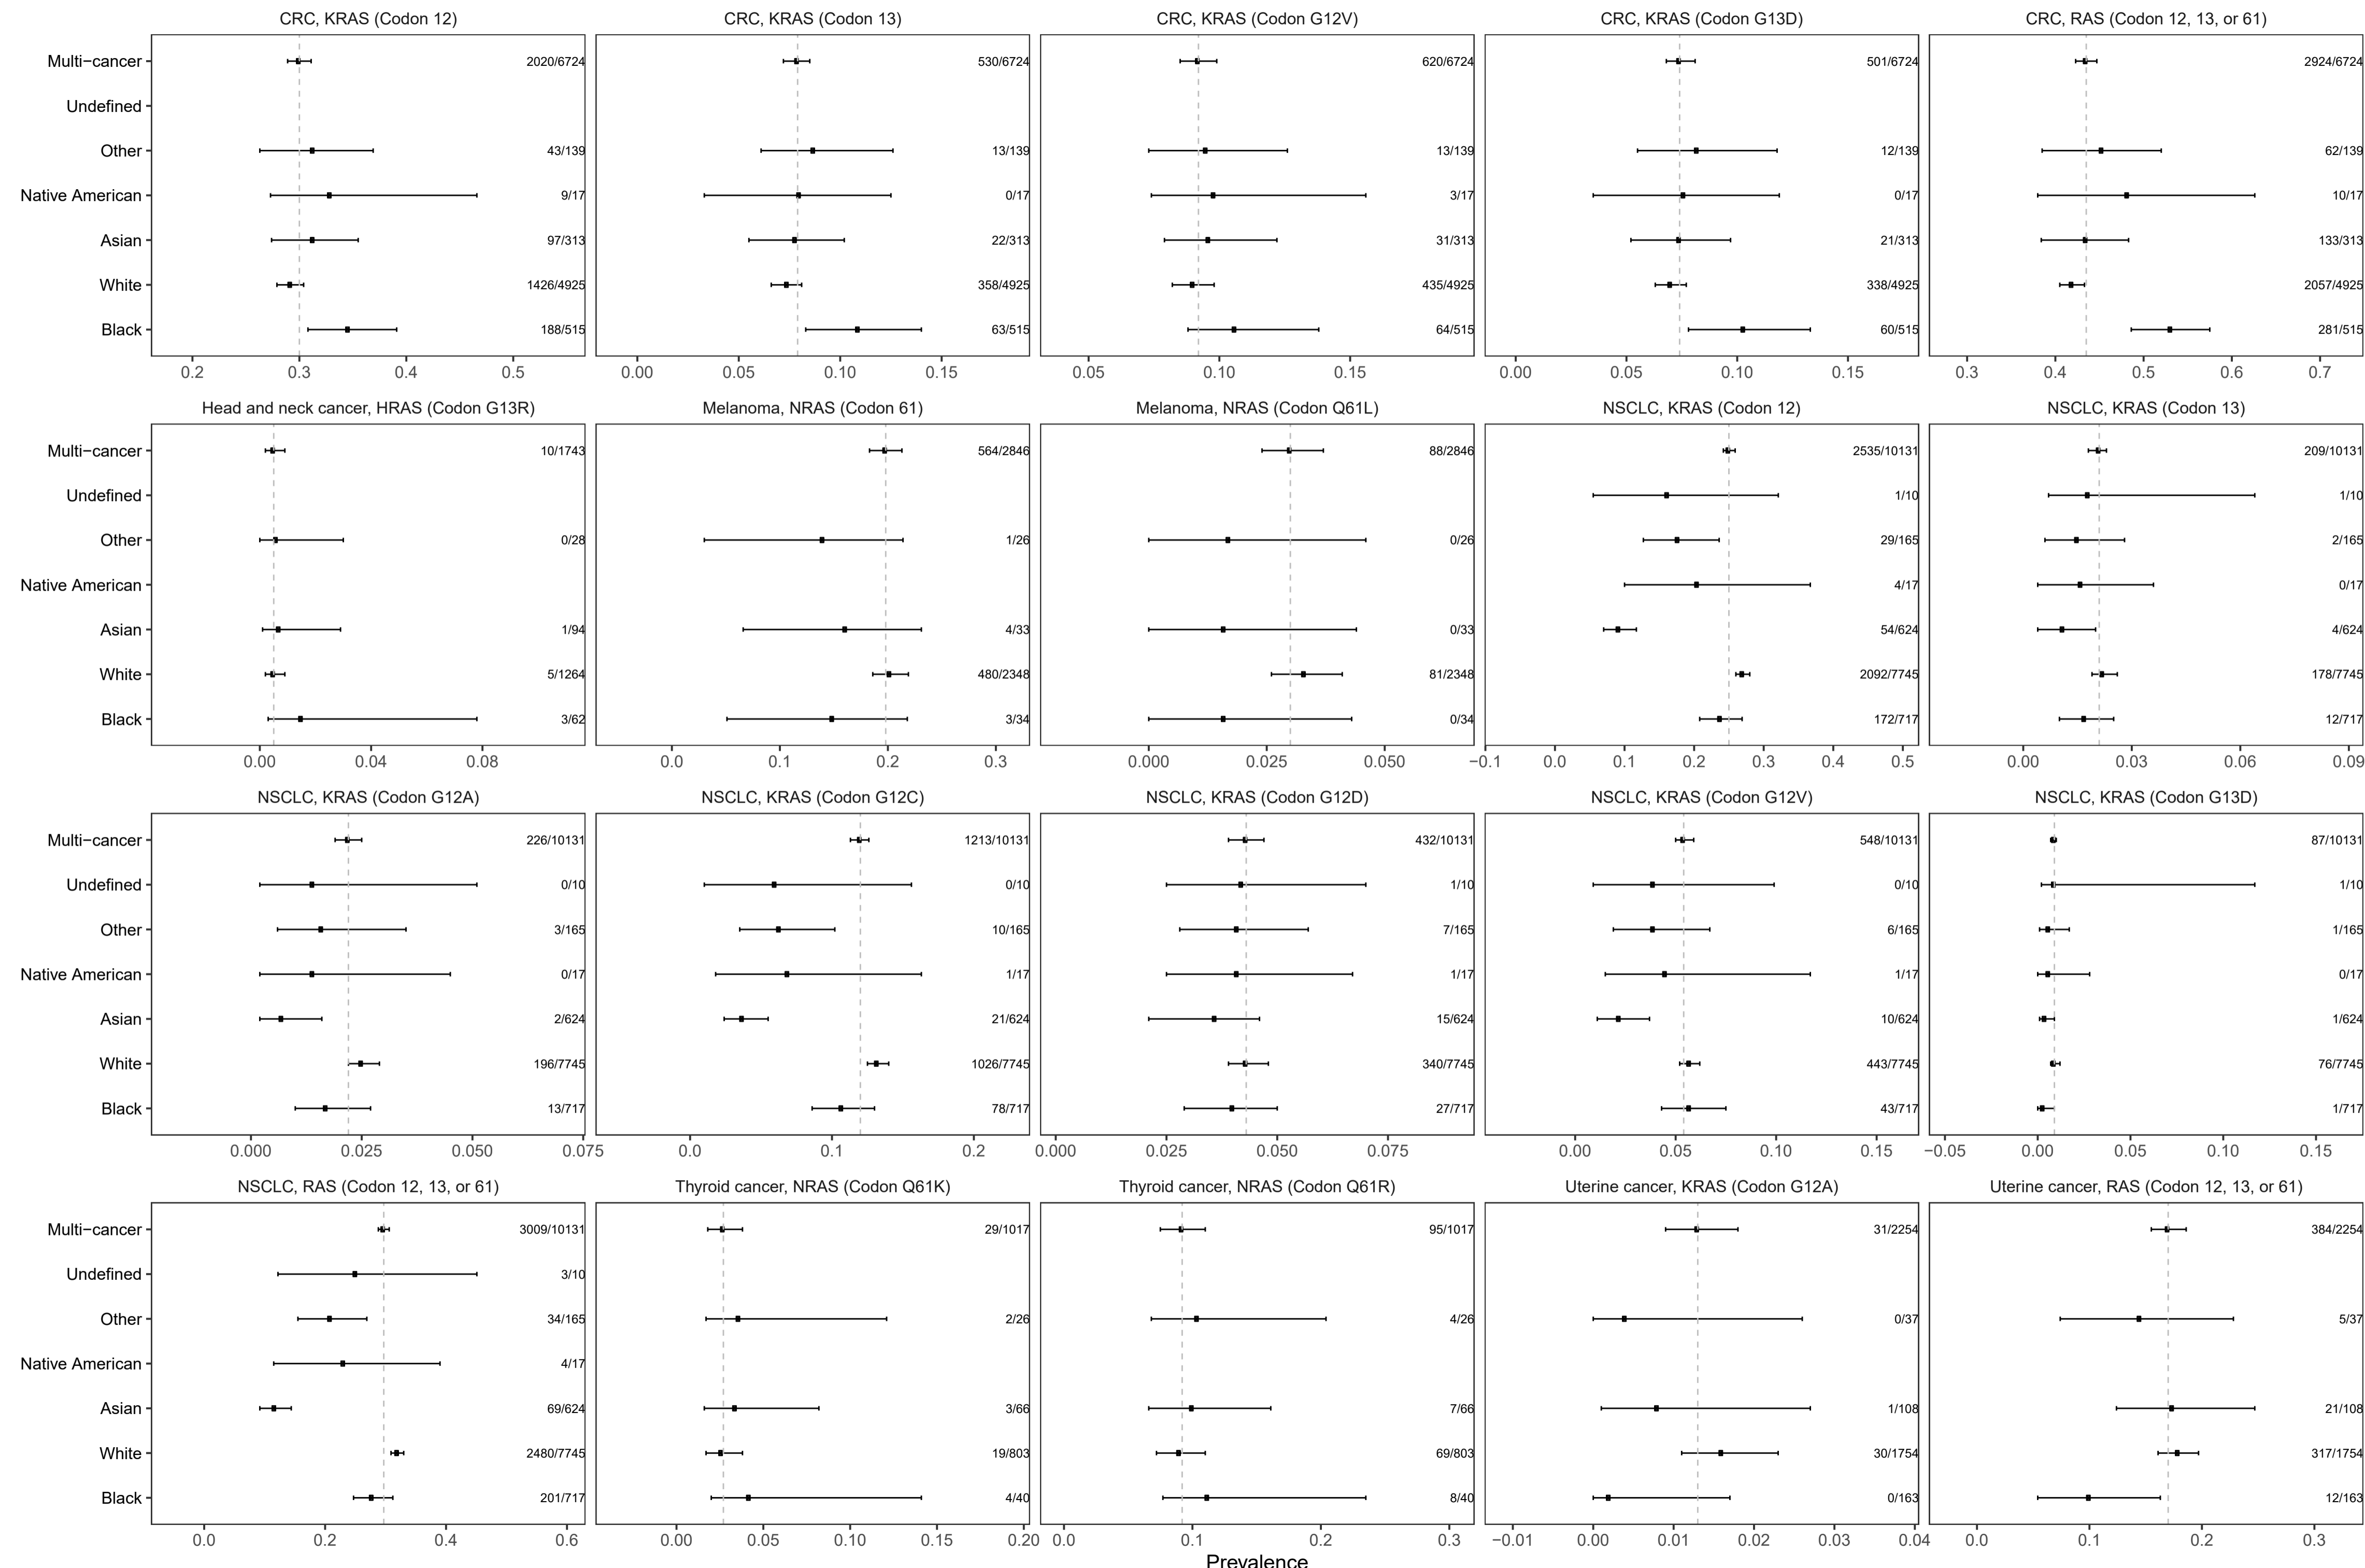

Supplement: can-22-1731_supplementary_fig.s10_supp10.pdf [file can-22-1731_supplementary_fig.s10_supp10.pdf]

# Supplementary Figure S13

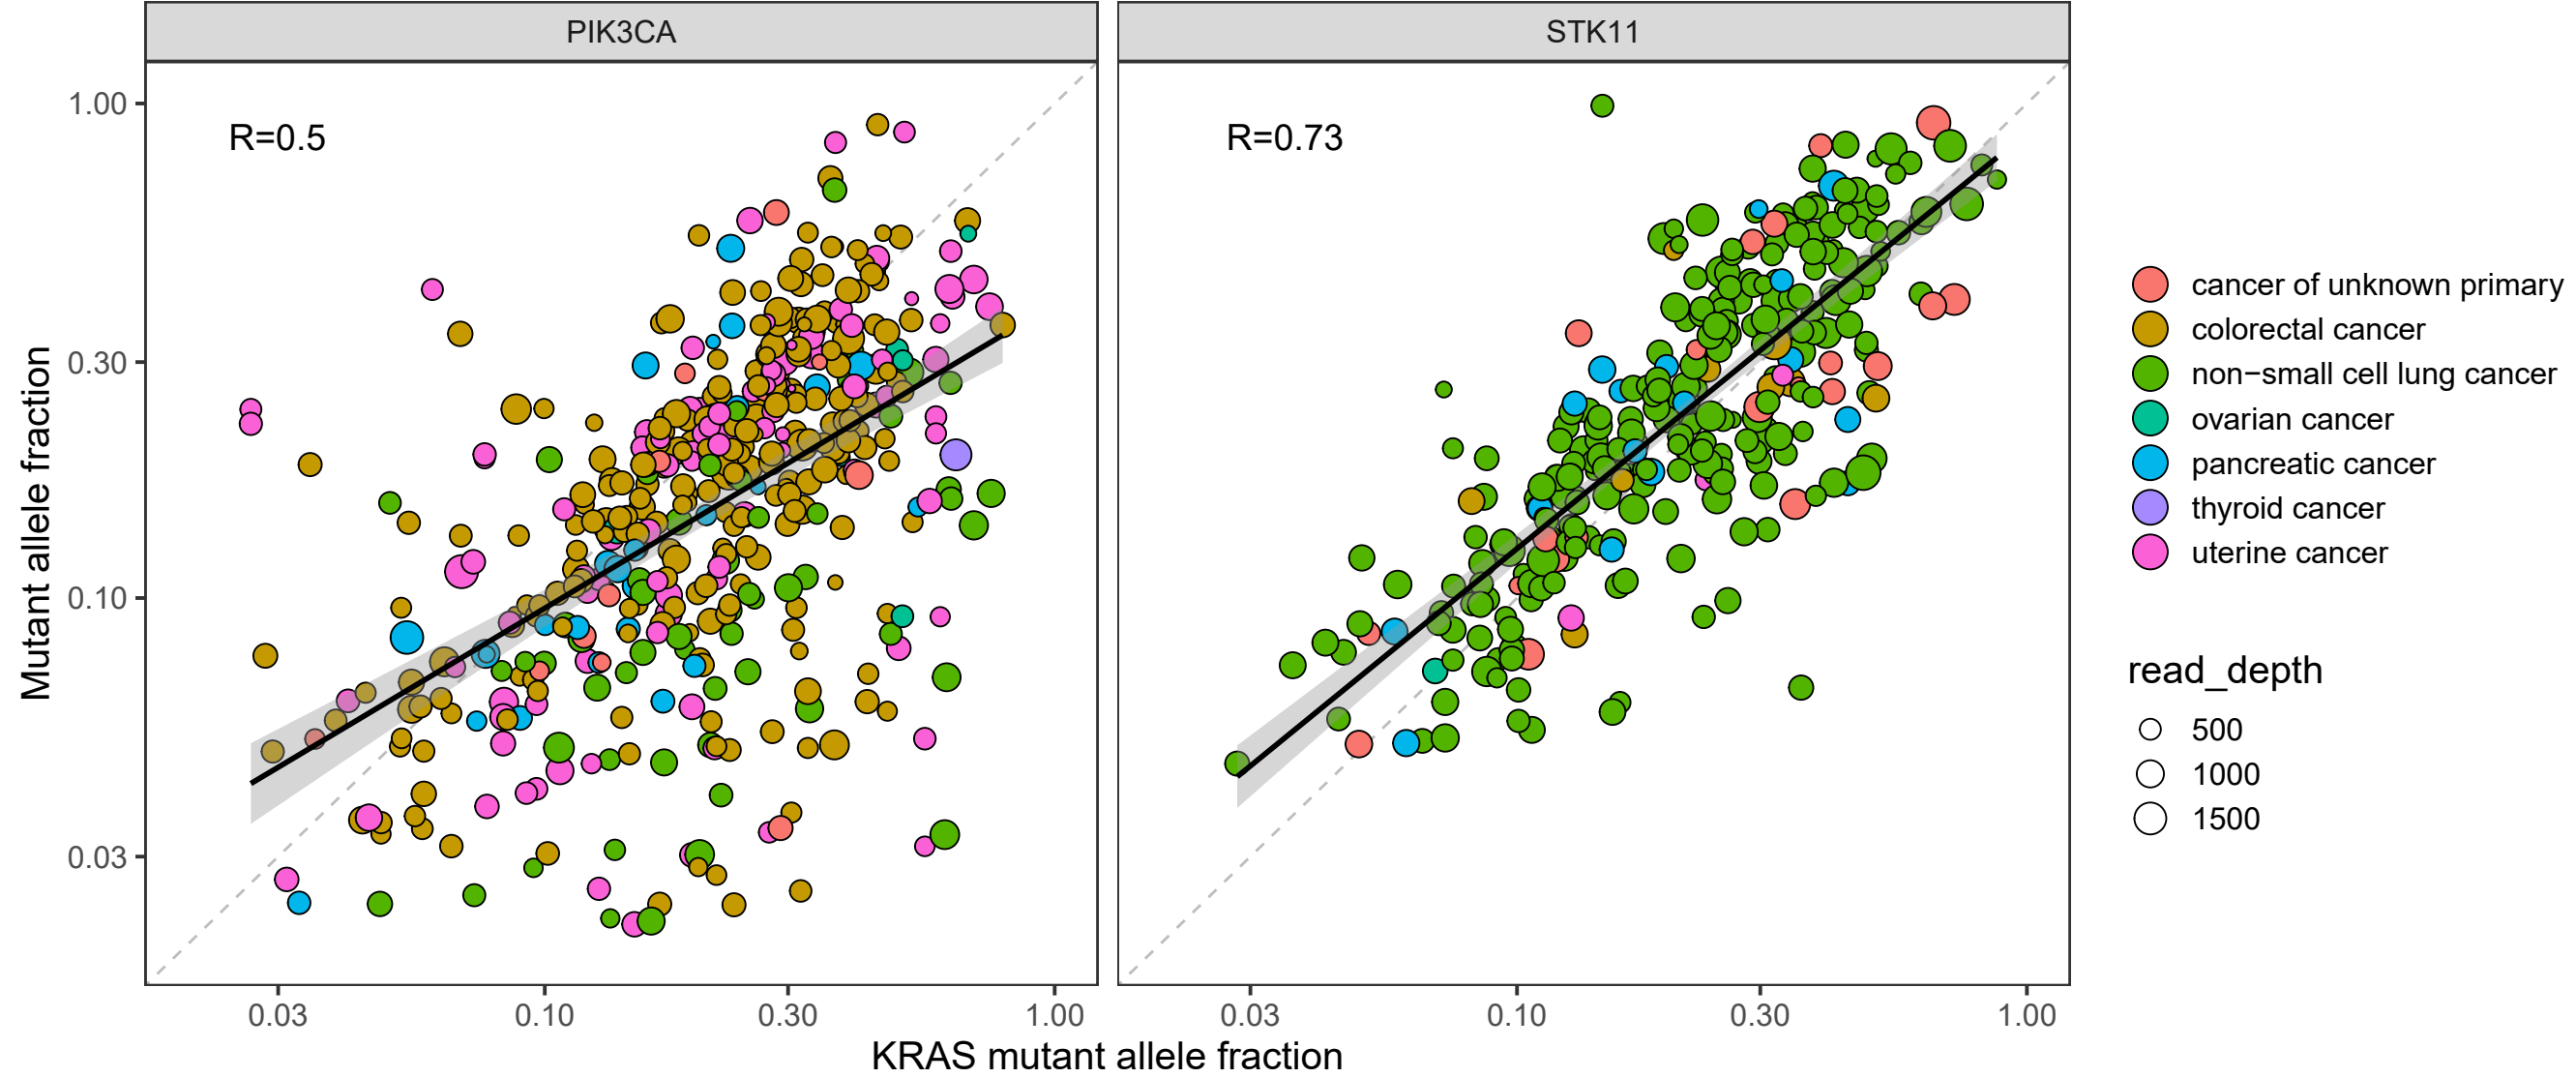

Supplement: can-22-1731_supplementary_fig.s13_supp13.pdf [file can-22-1731_supplementary_fig.s13_supp13.pdf]

# Supplementary Figure S14

## A

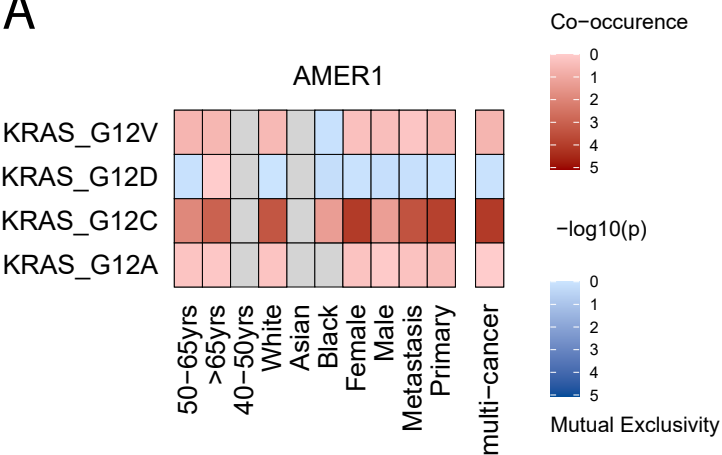

## B

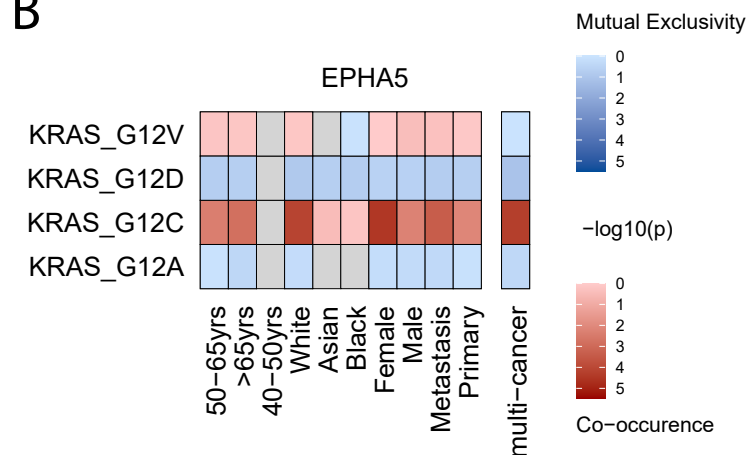

## C

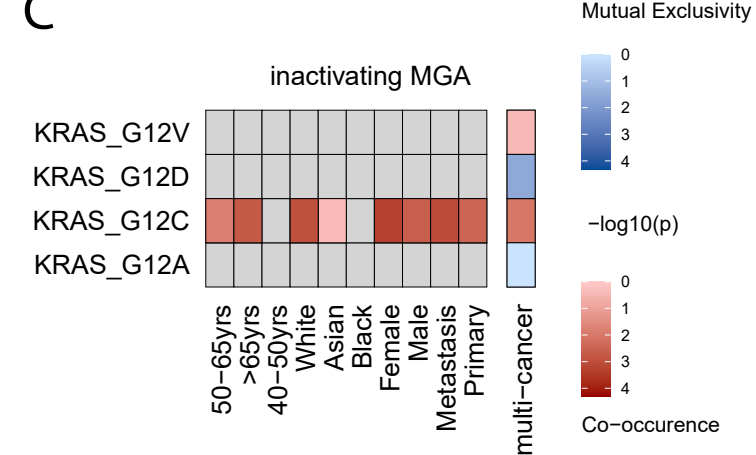

## D

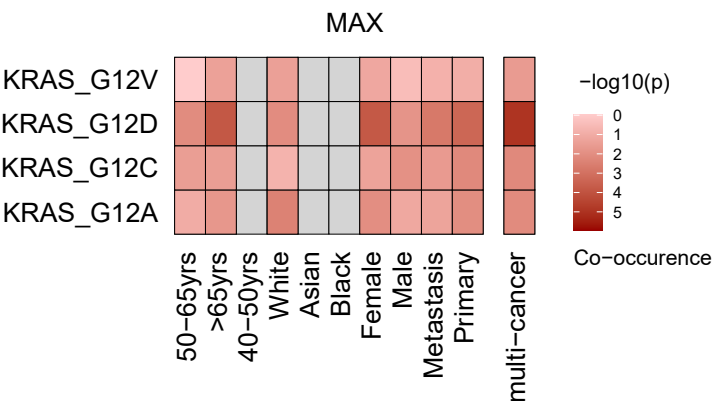

## E

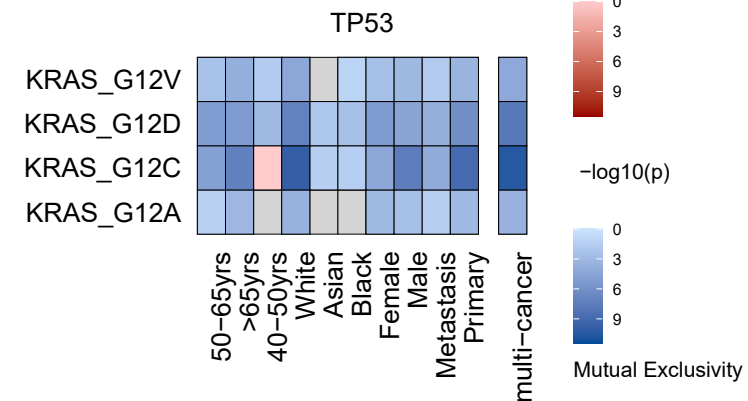

## F

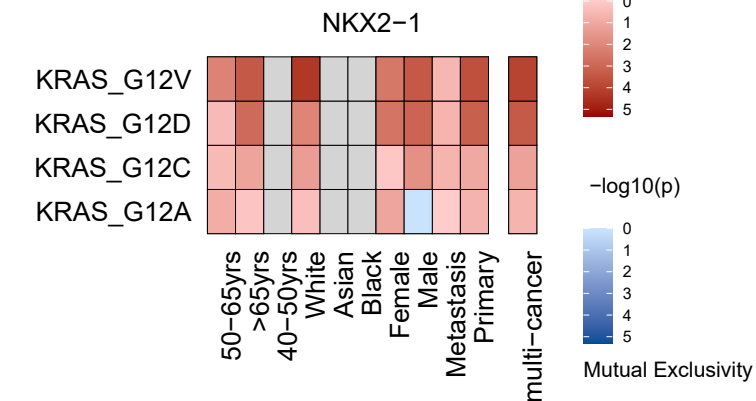

## G

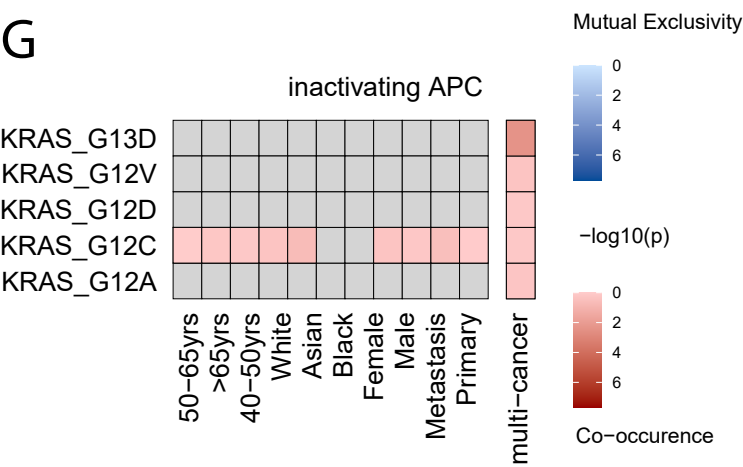

## H

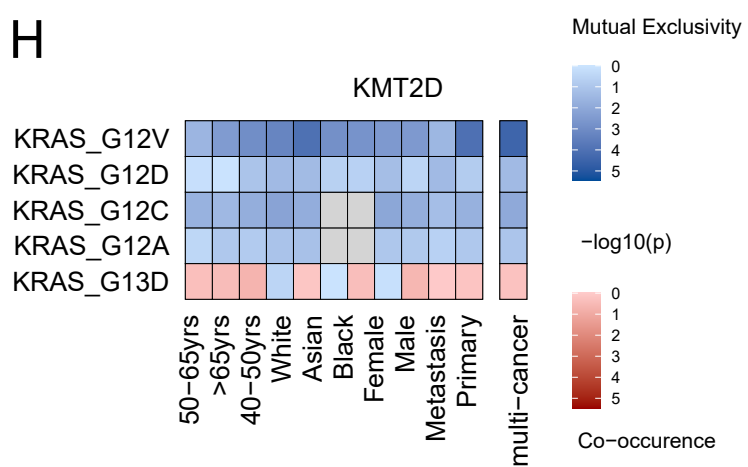

## I

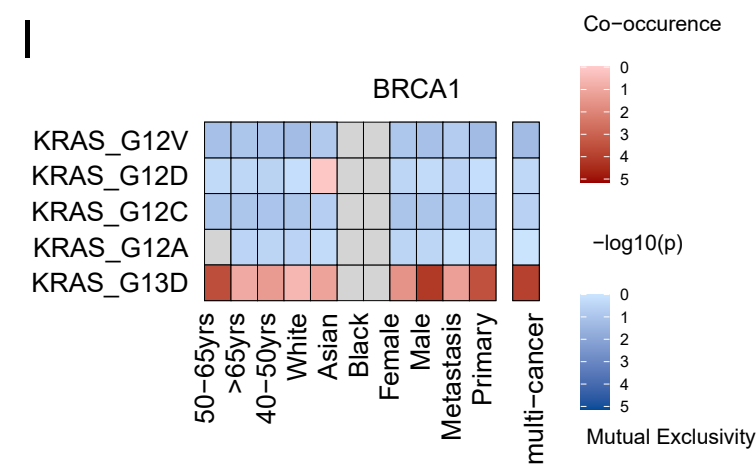

Supplement: can-22-1731_supplementary_fig.s14_supp14.pdf [file can-22-1731_supplementary_fig.s14_supp14.pdf]

# Supplementary Figure S15

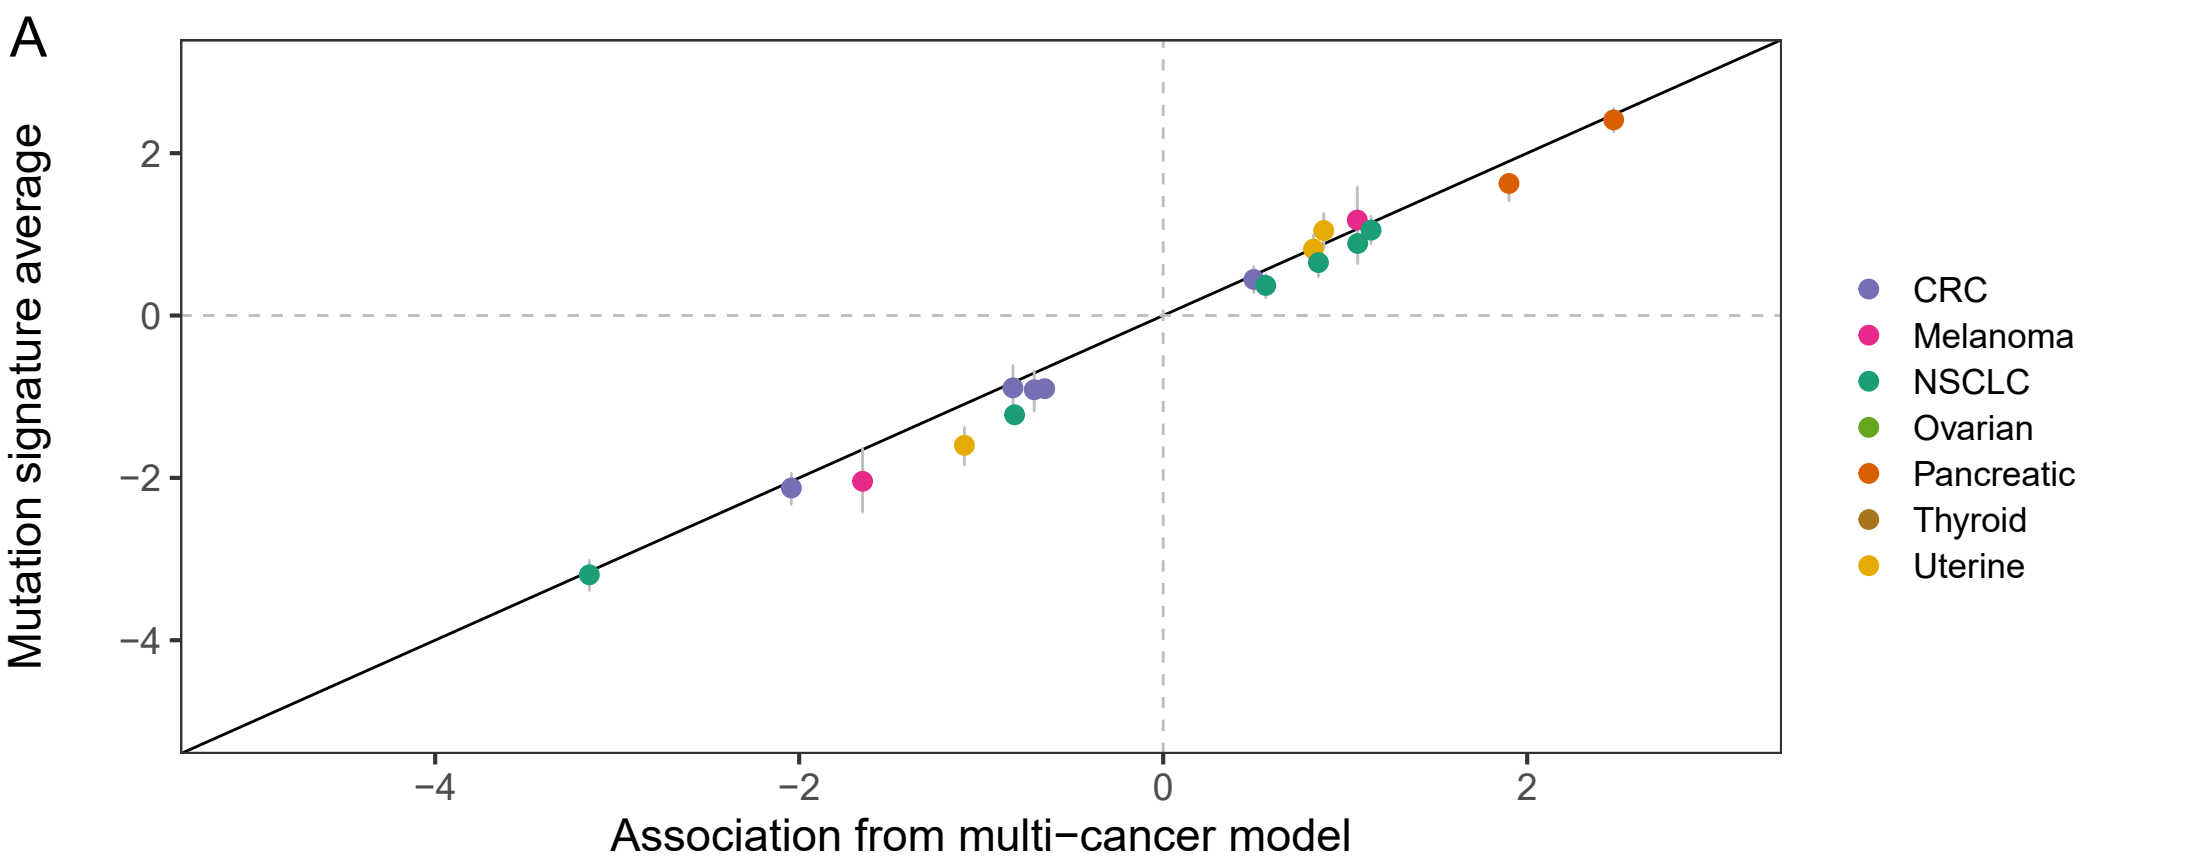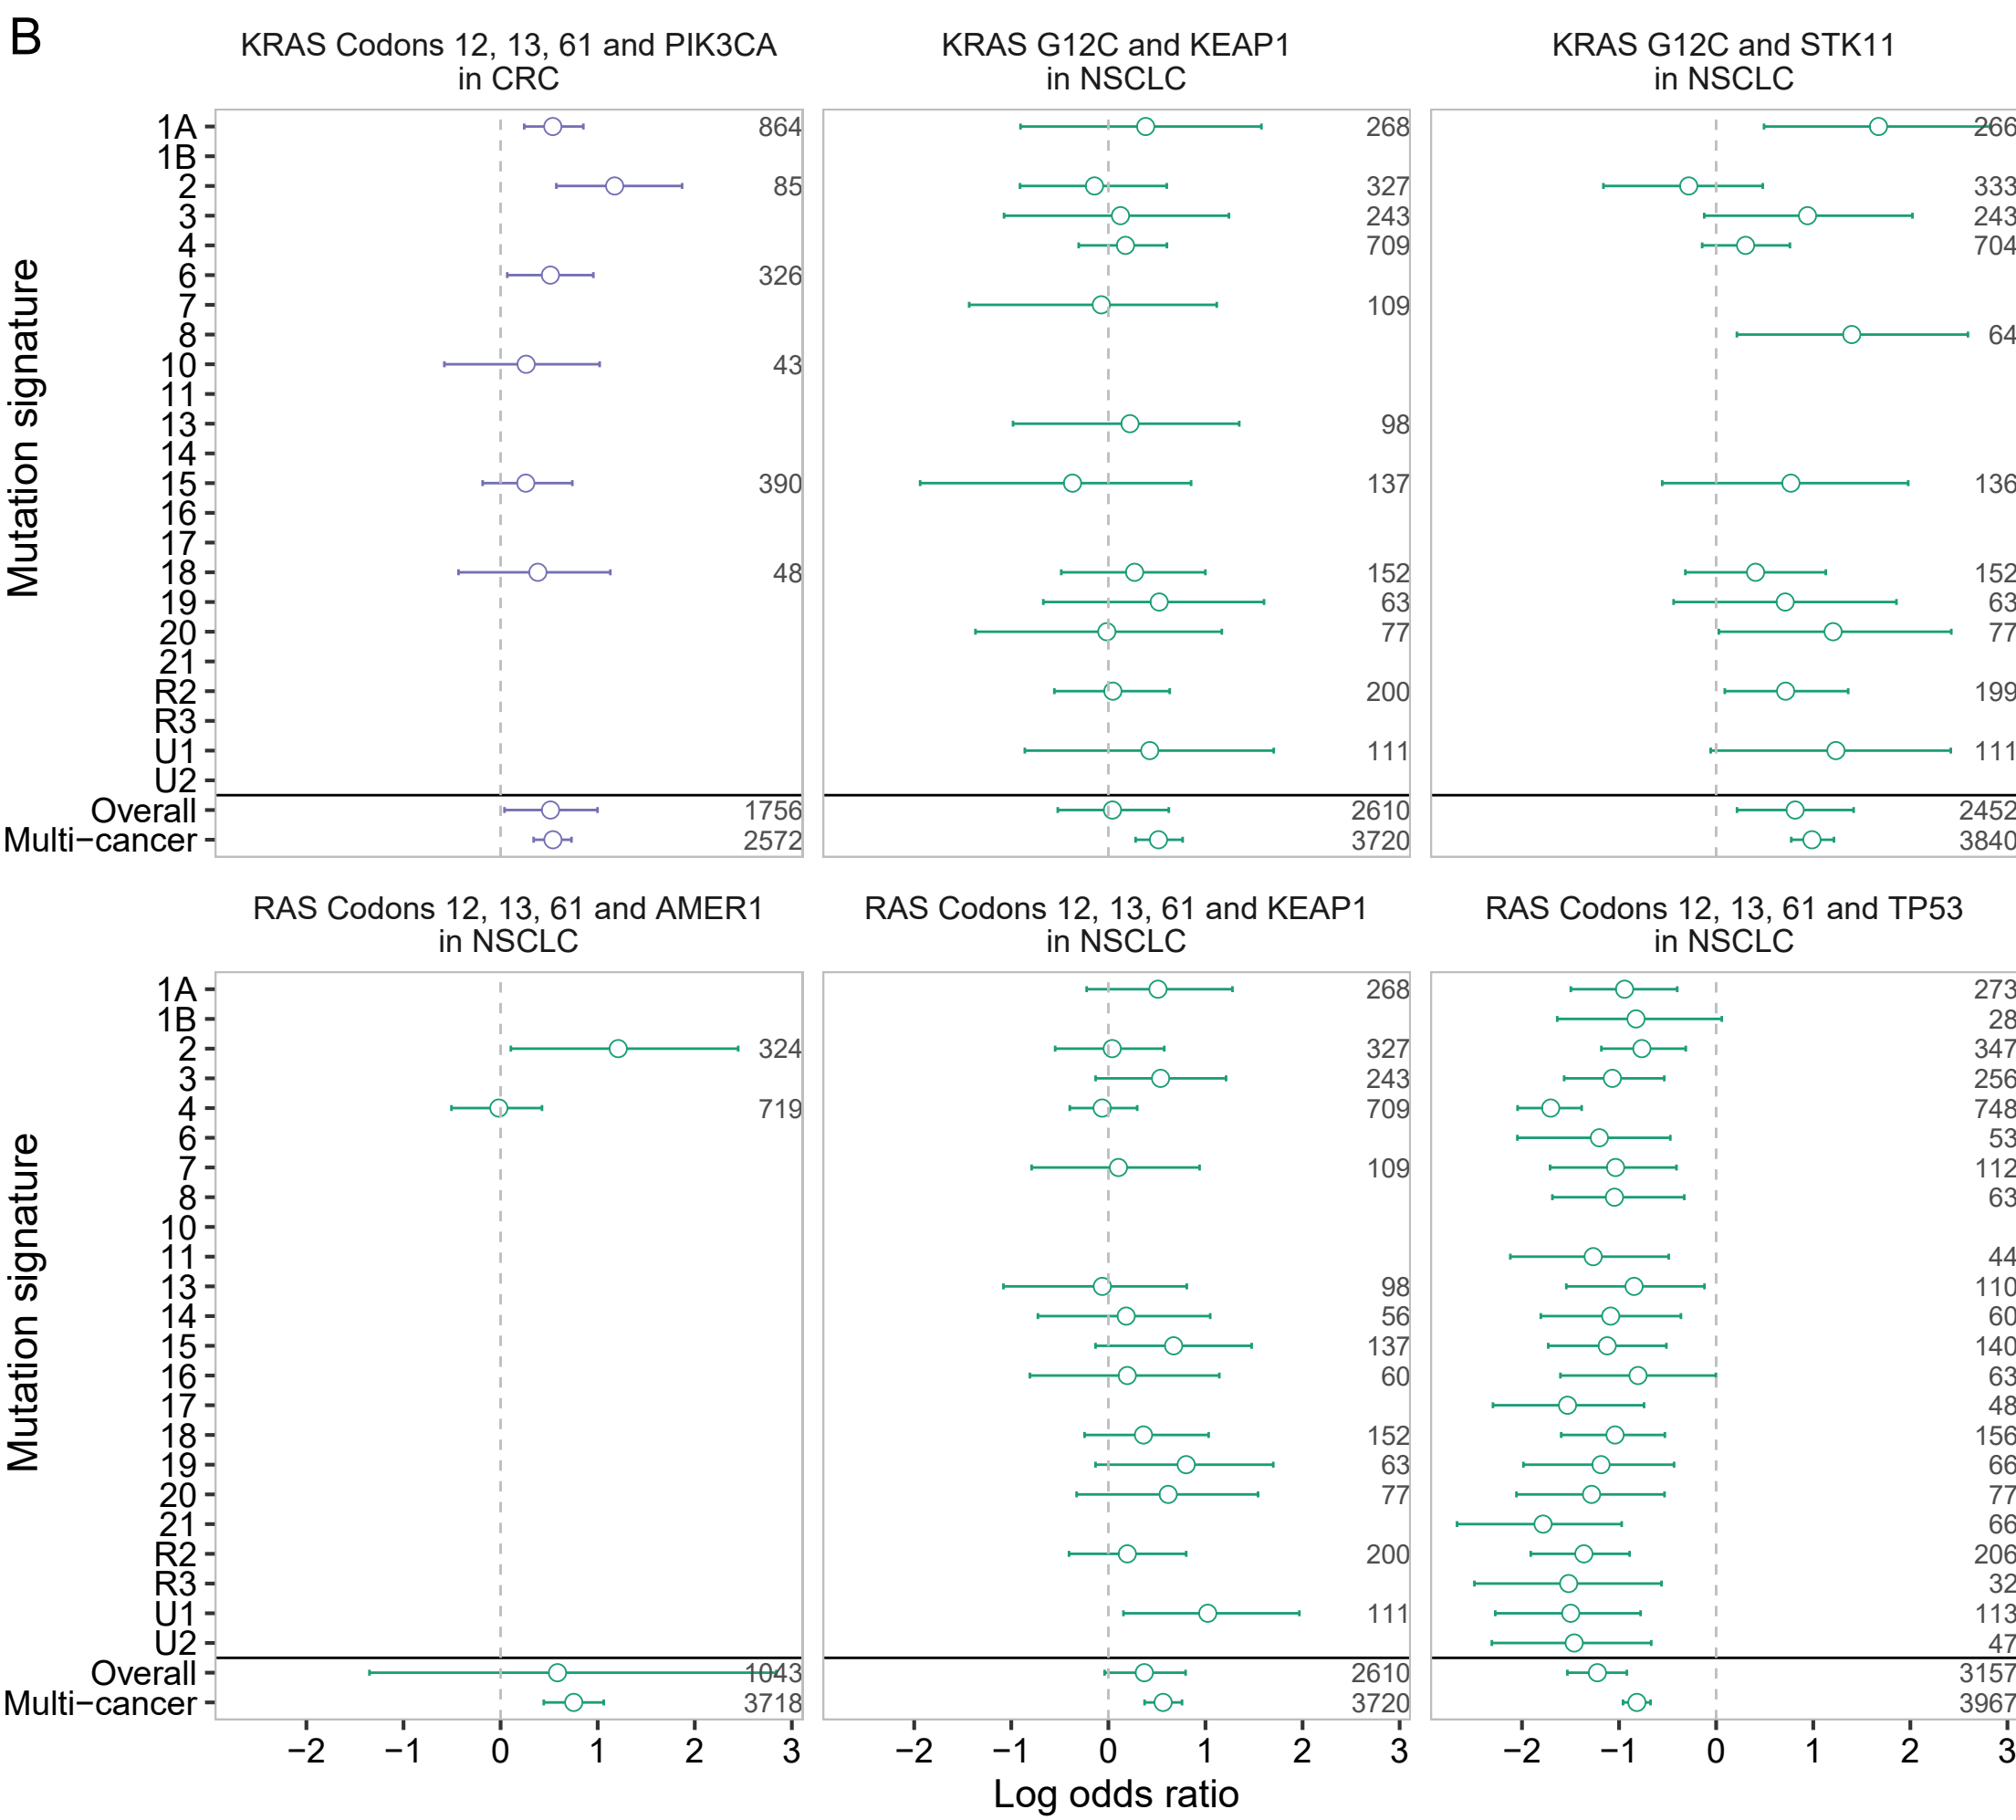

Supplement: can-22-1731_supplementary_fig.s15_supp15.pdf [file can-22-1731_supplementary_fig.s15_supp15.pdf]

# Supplementary Figure S18

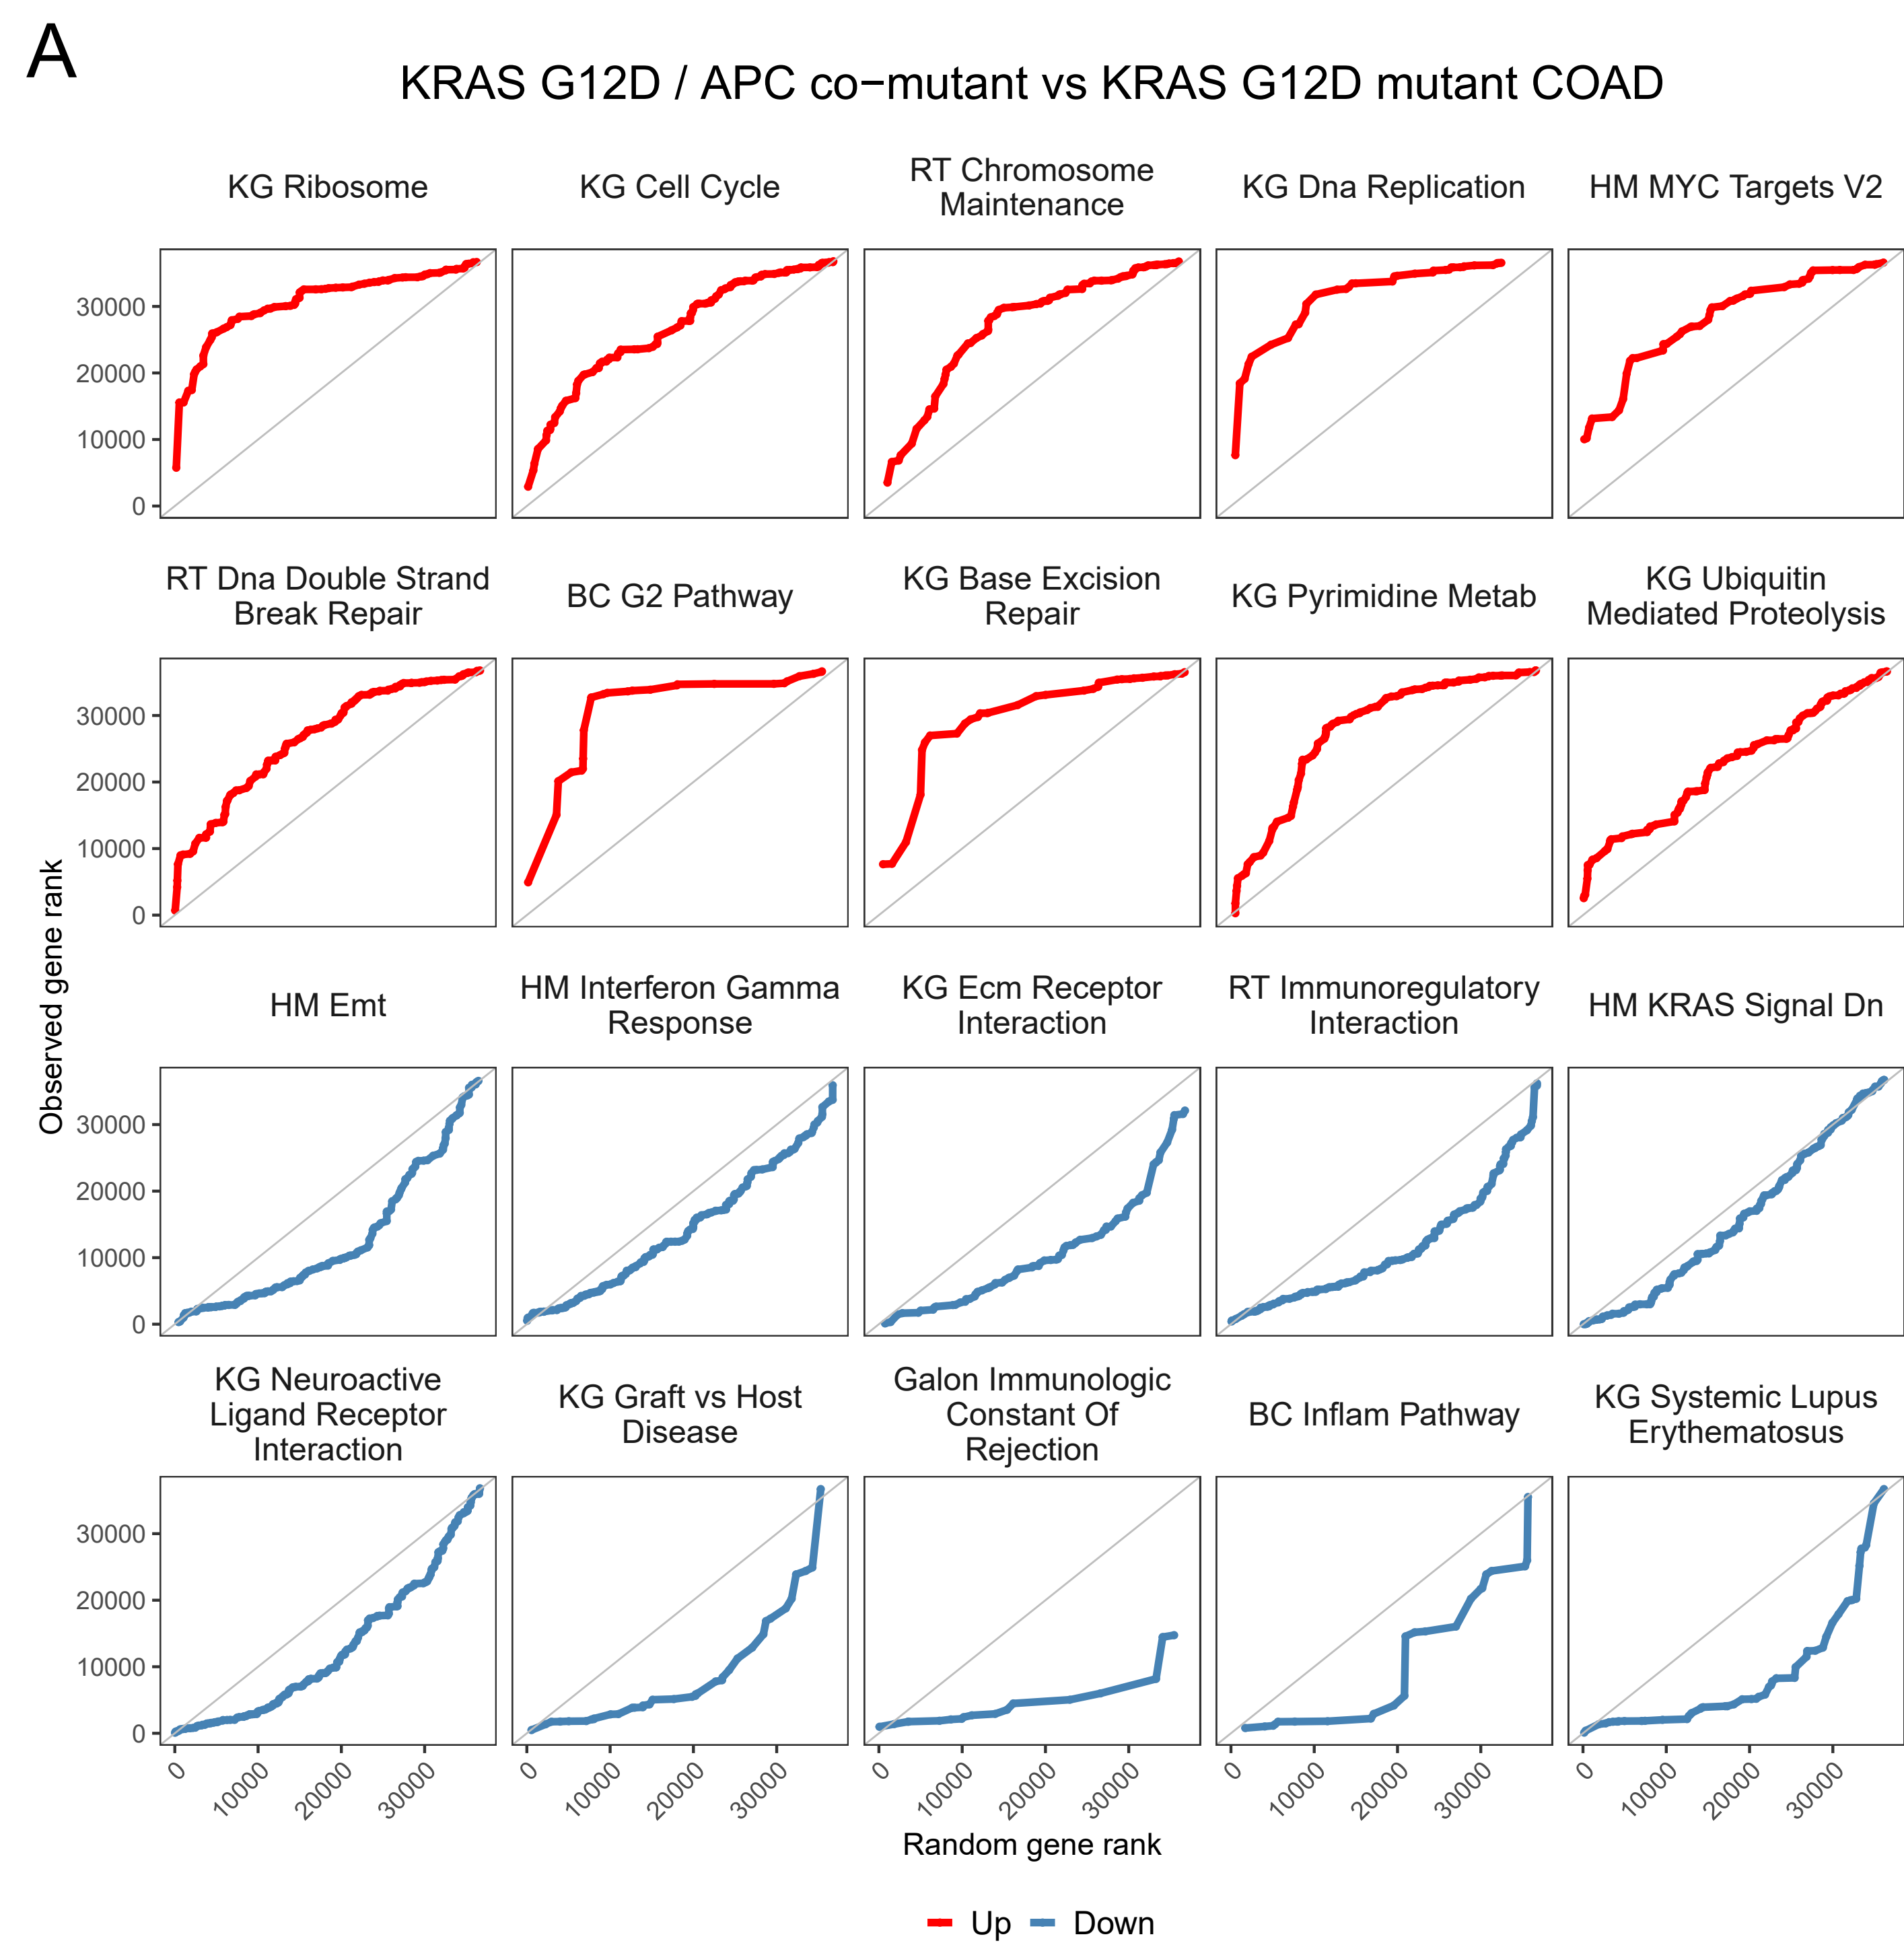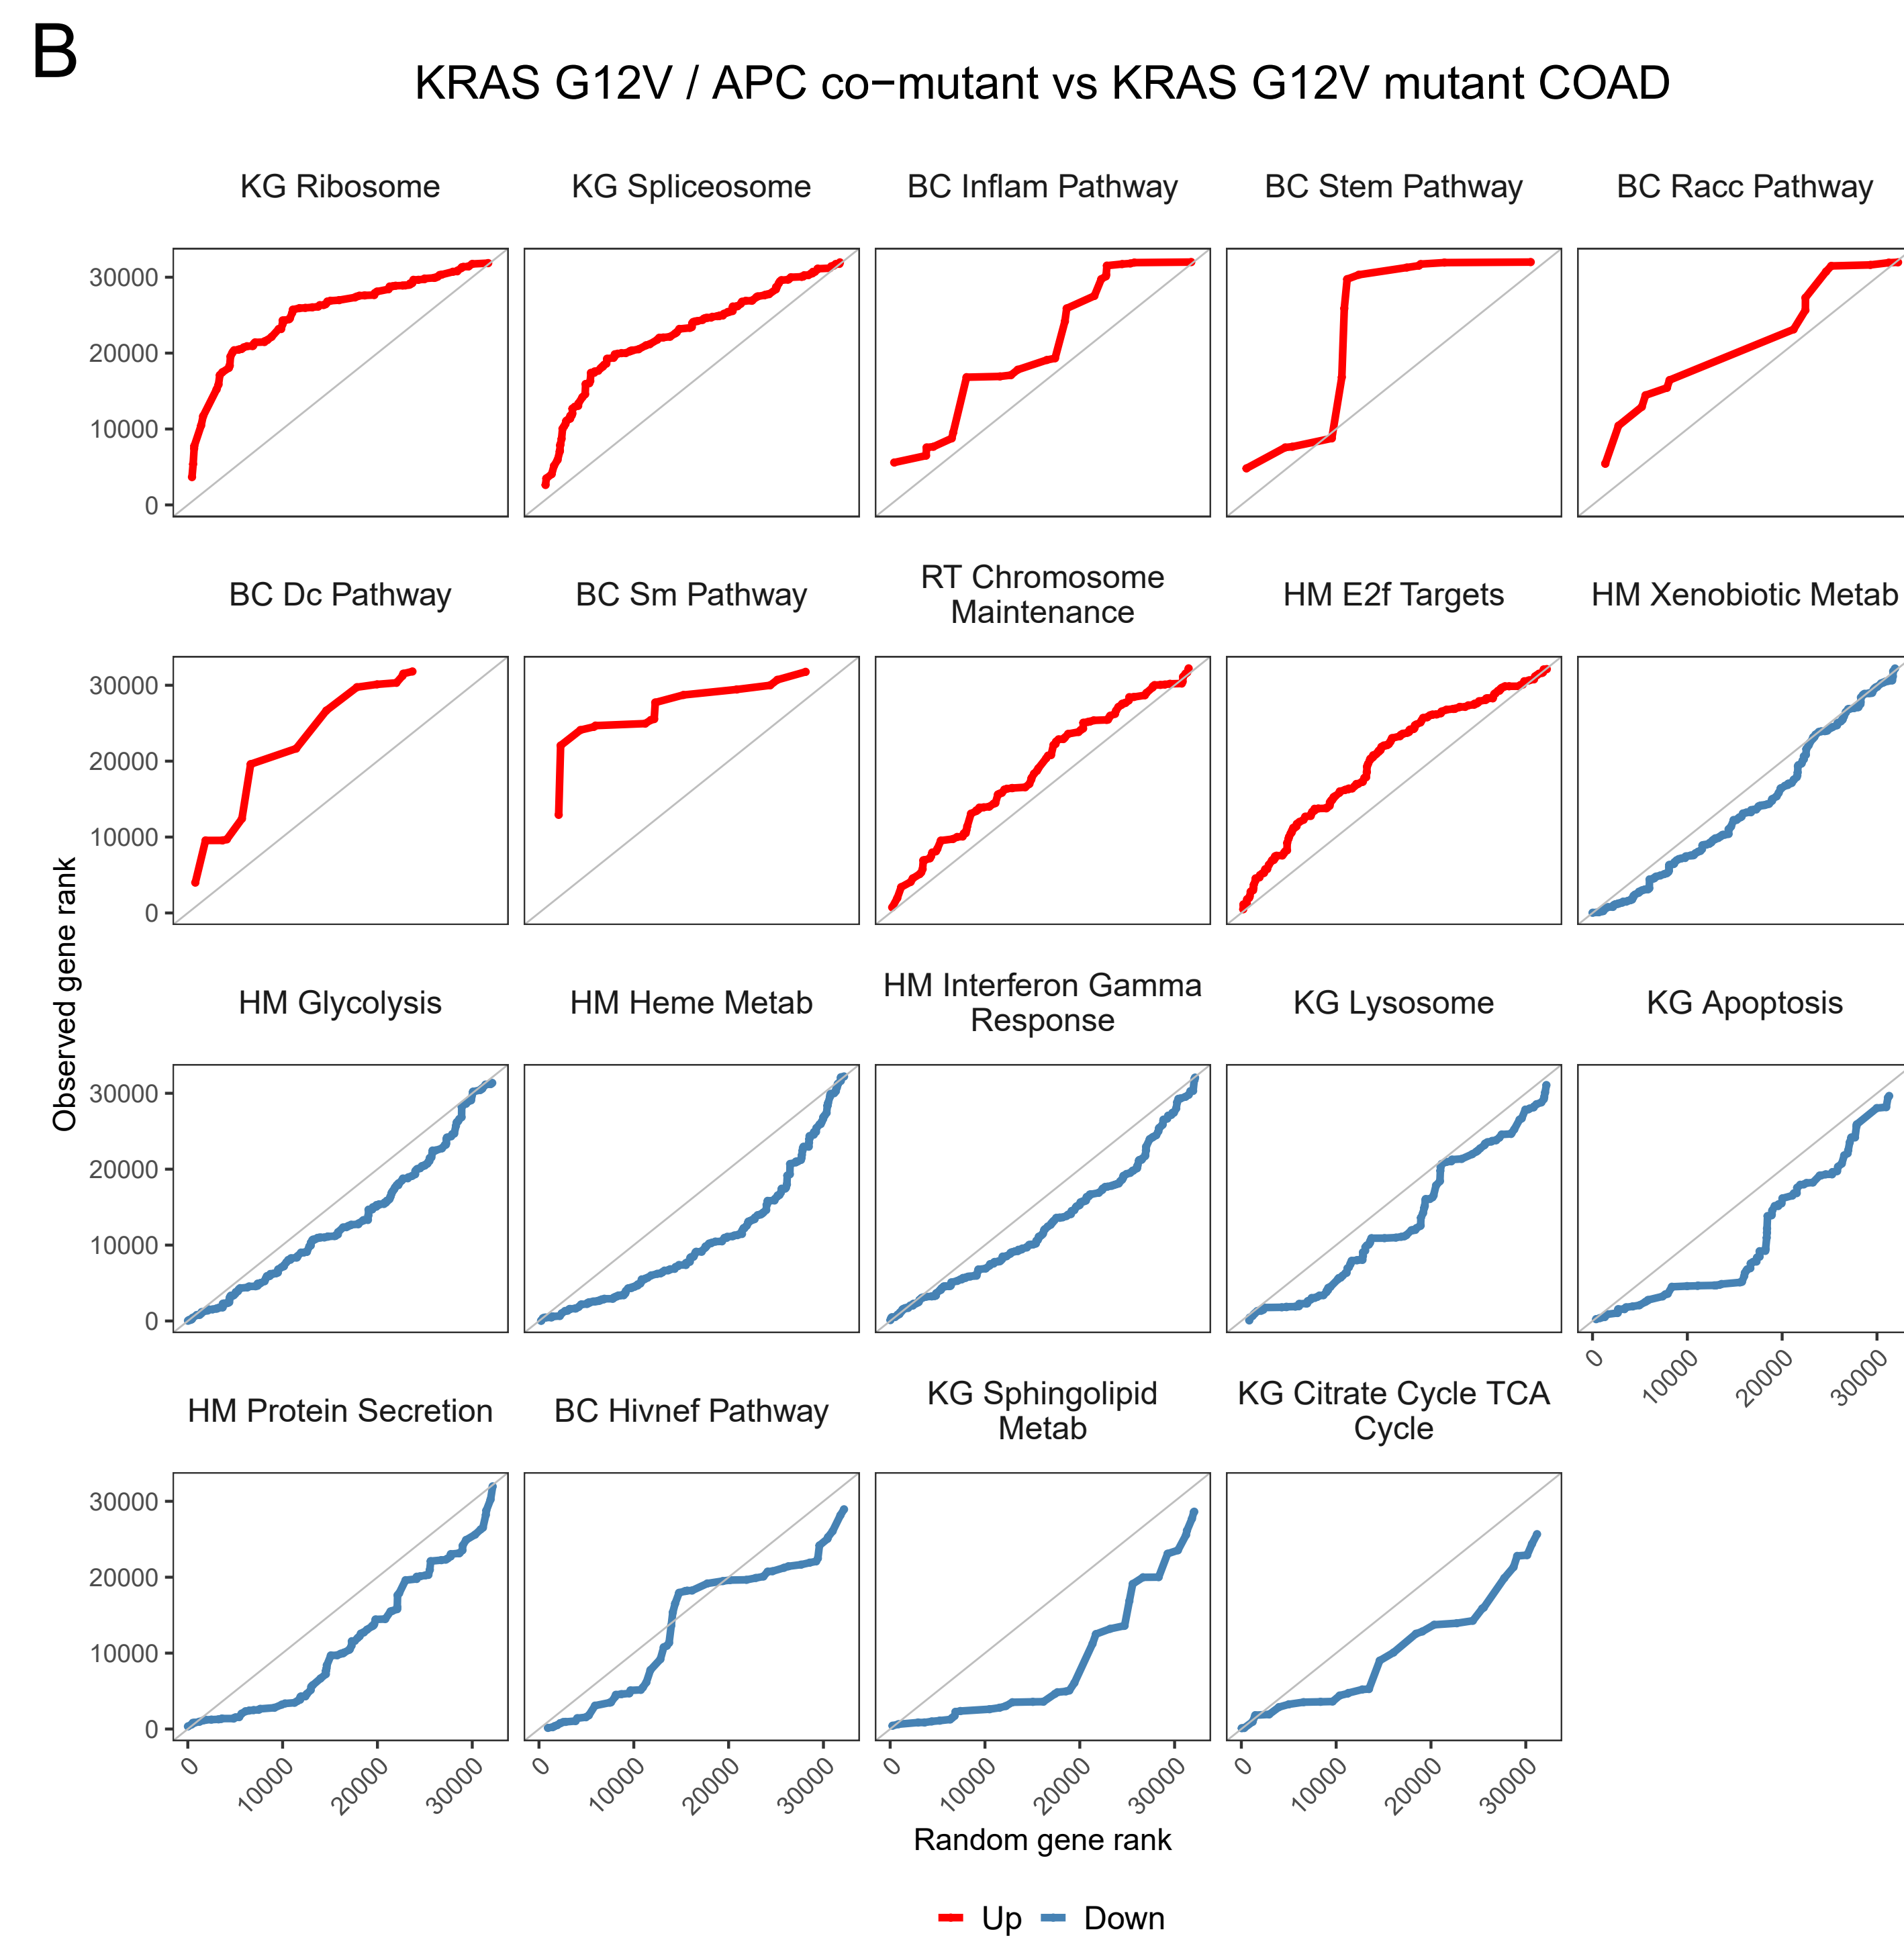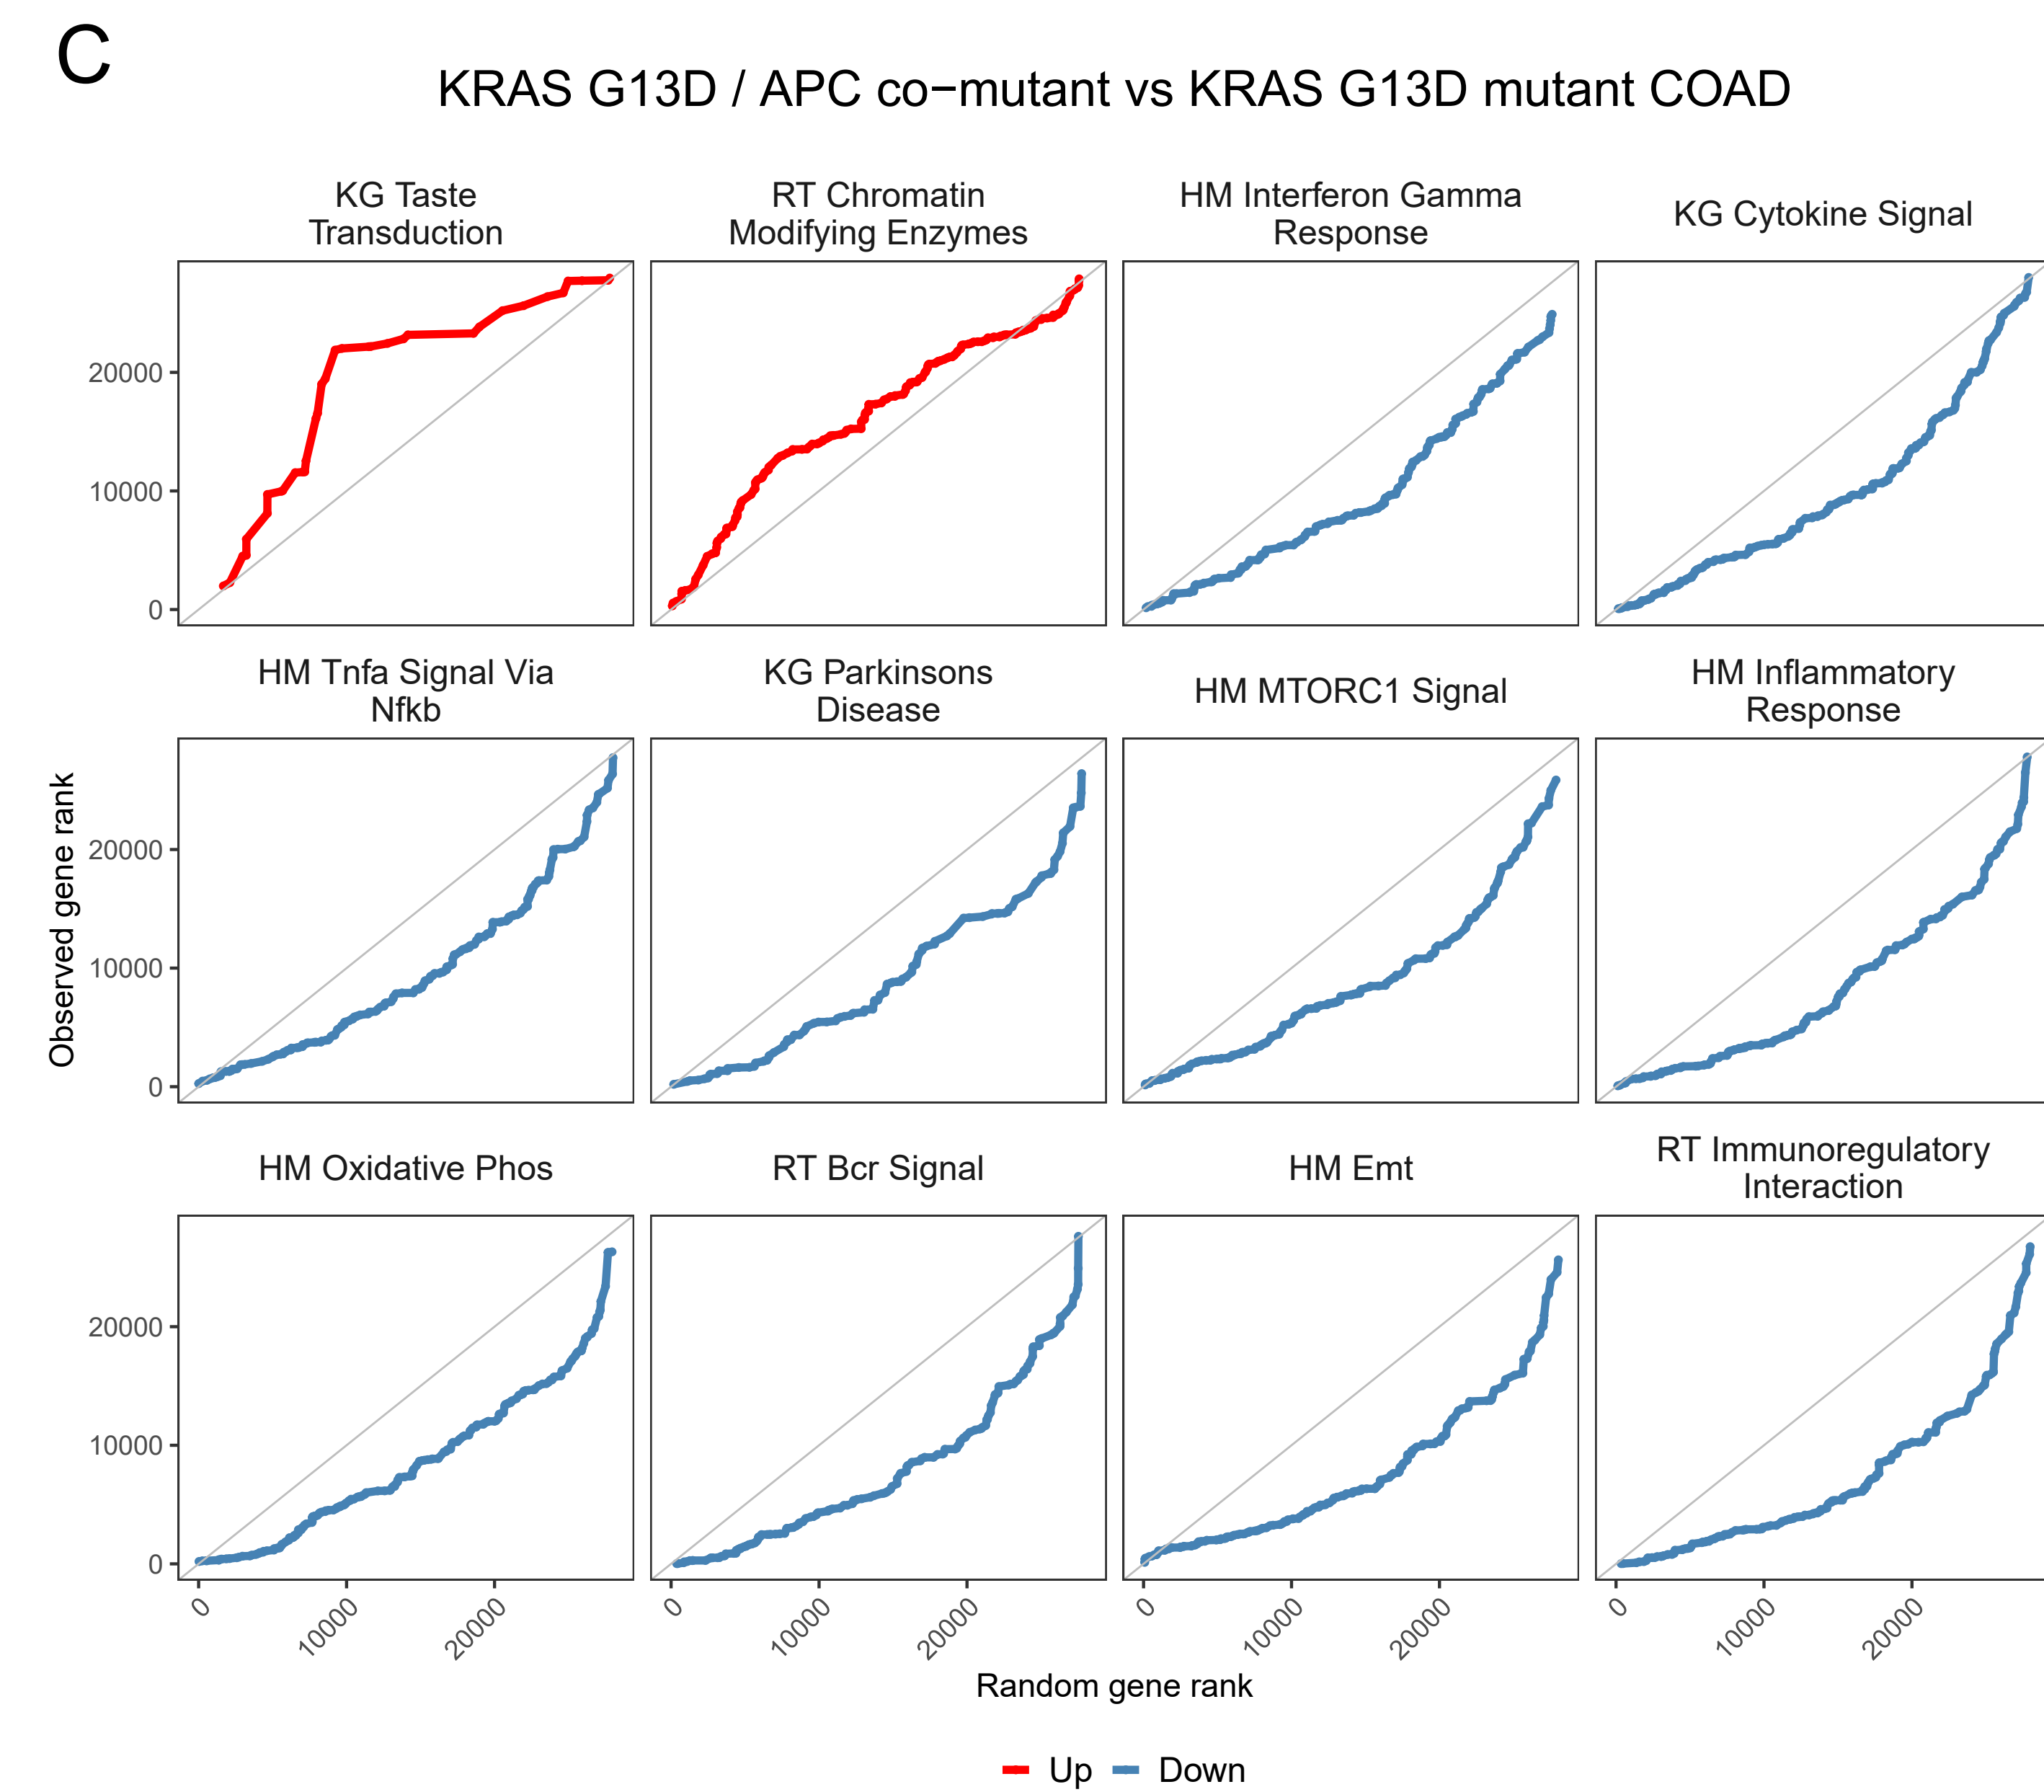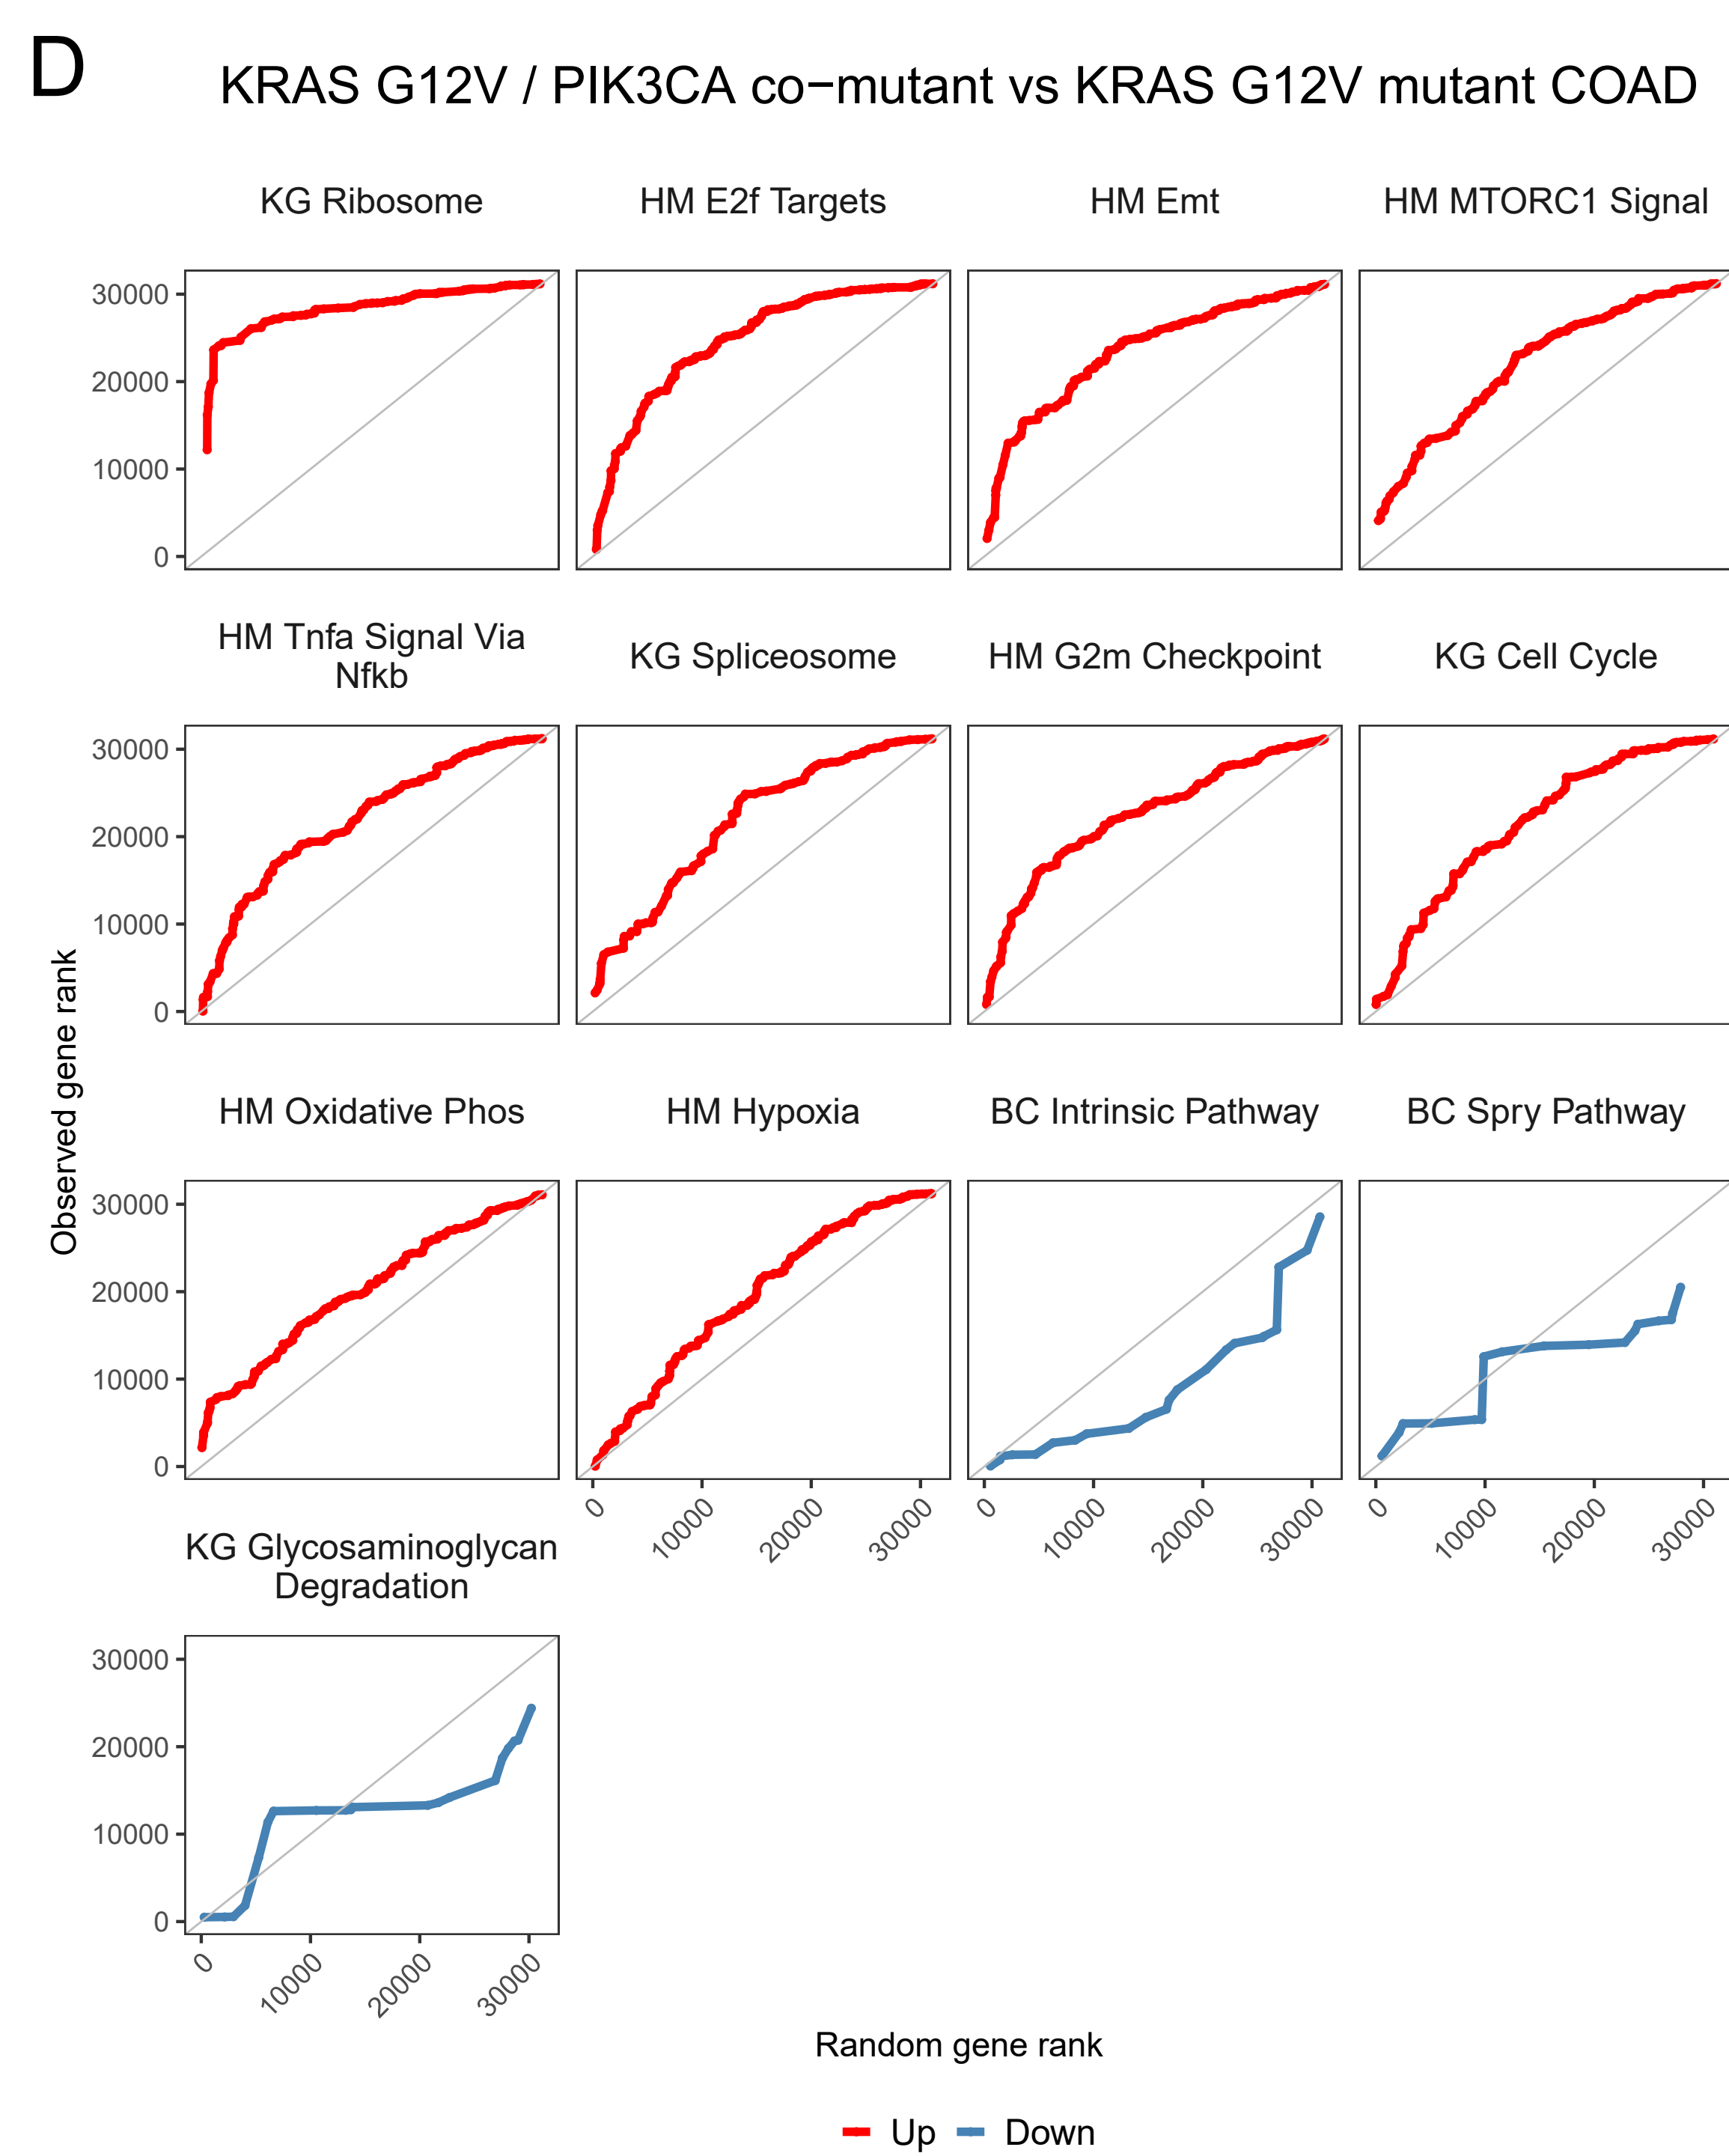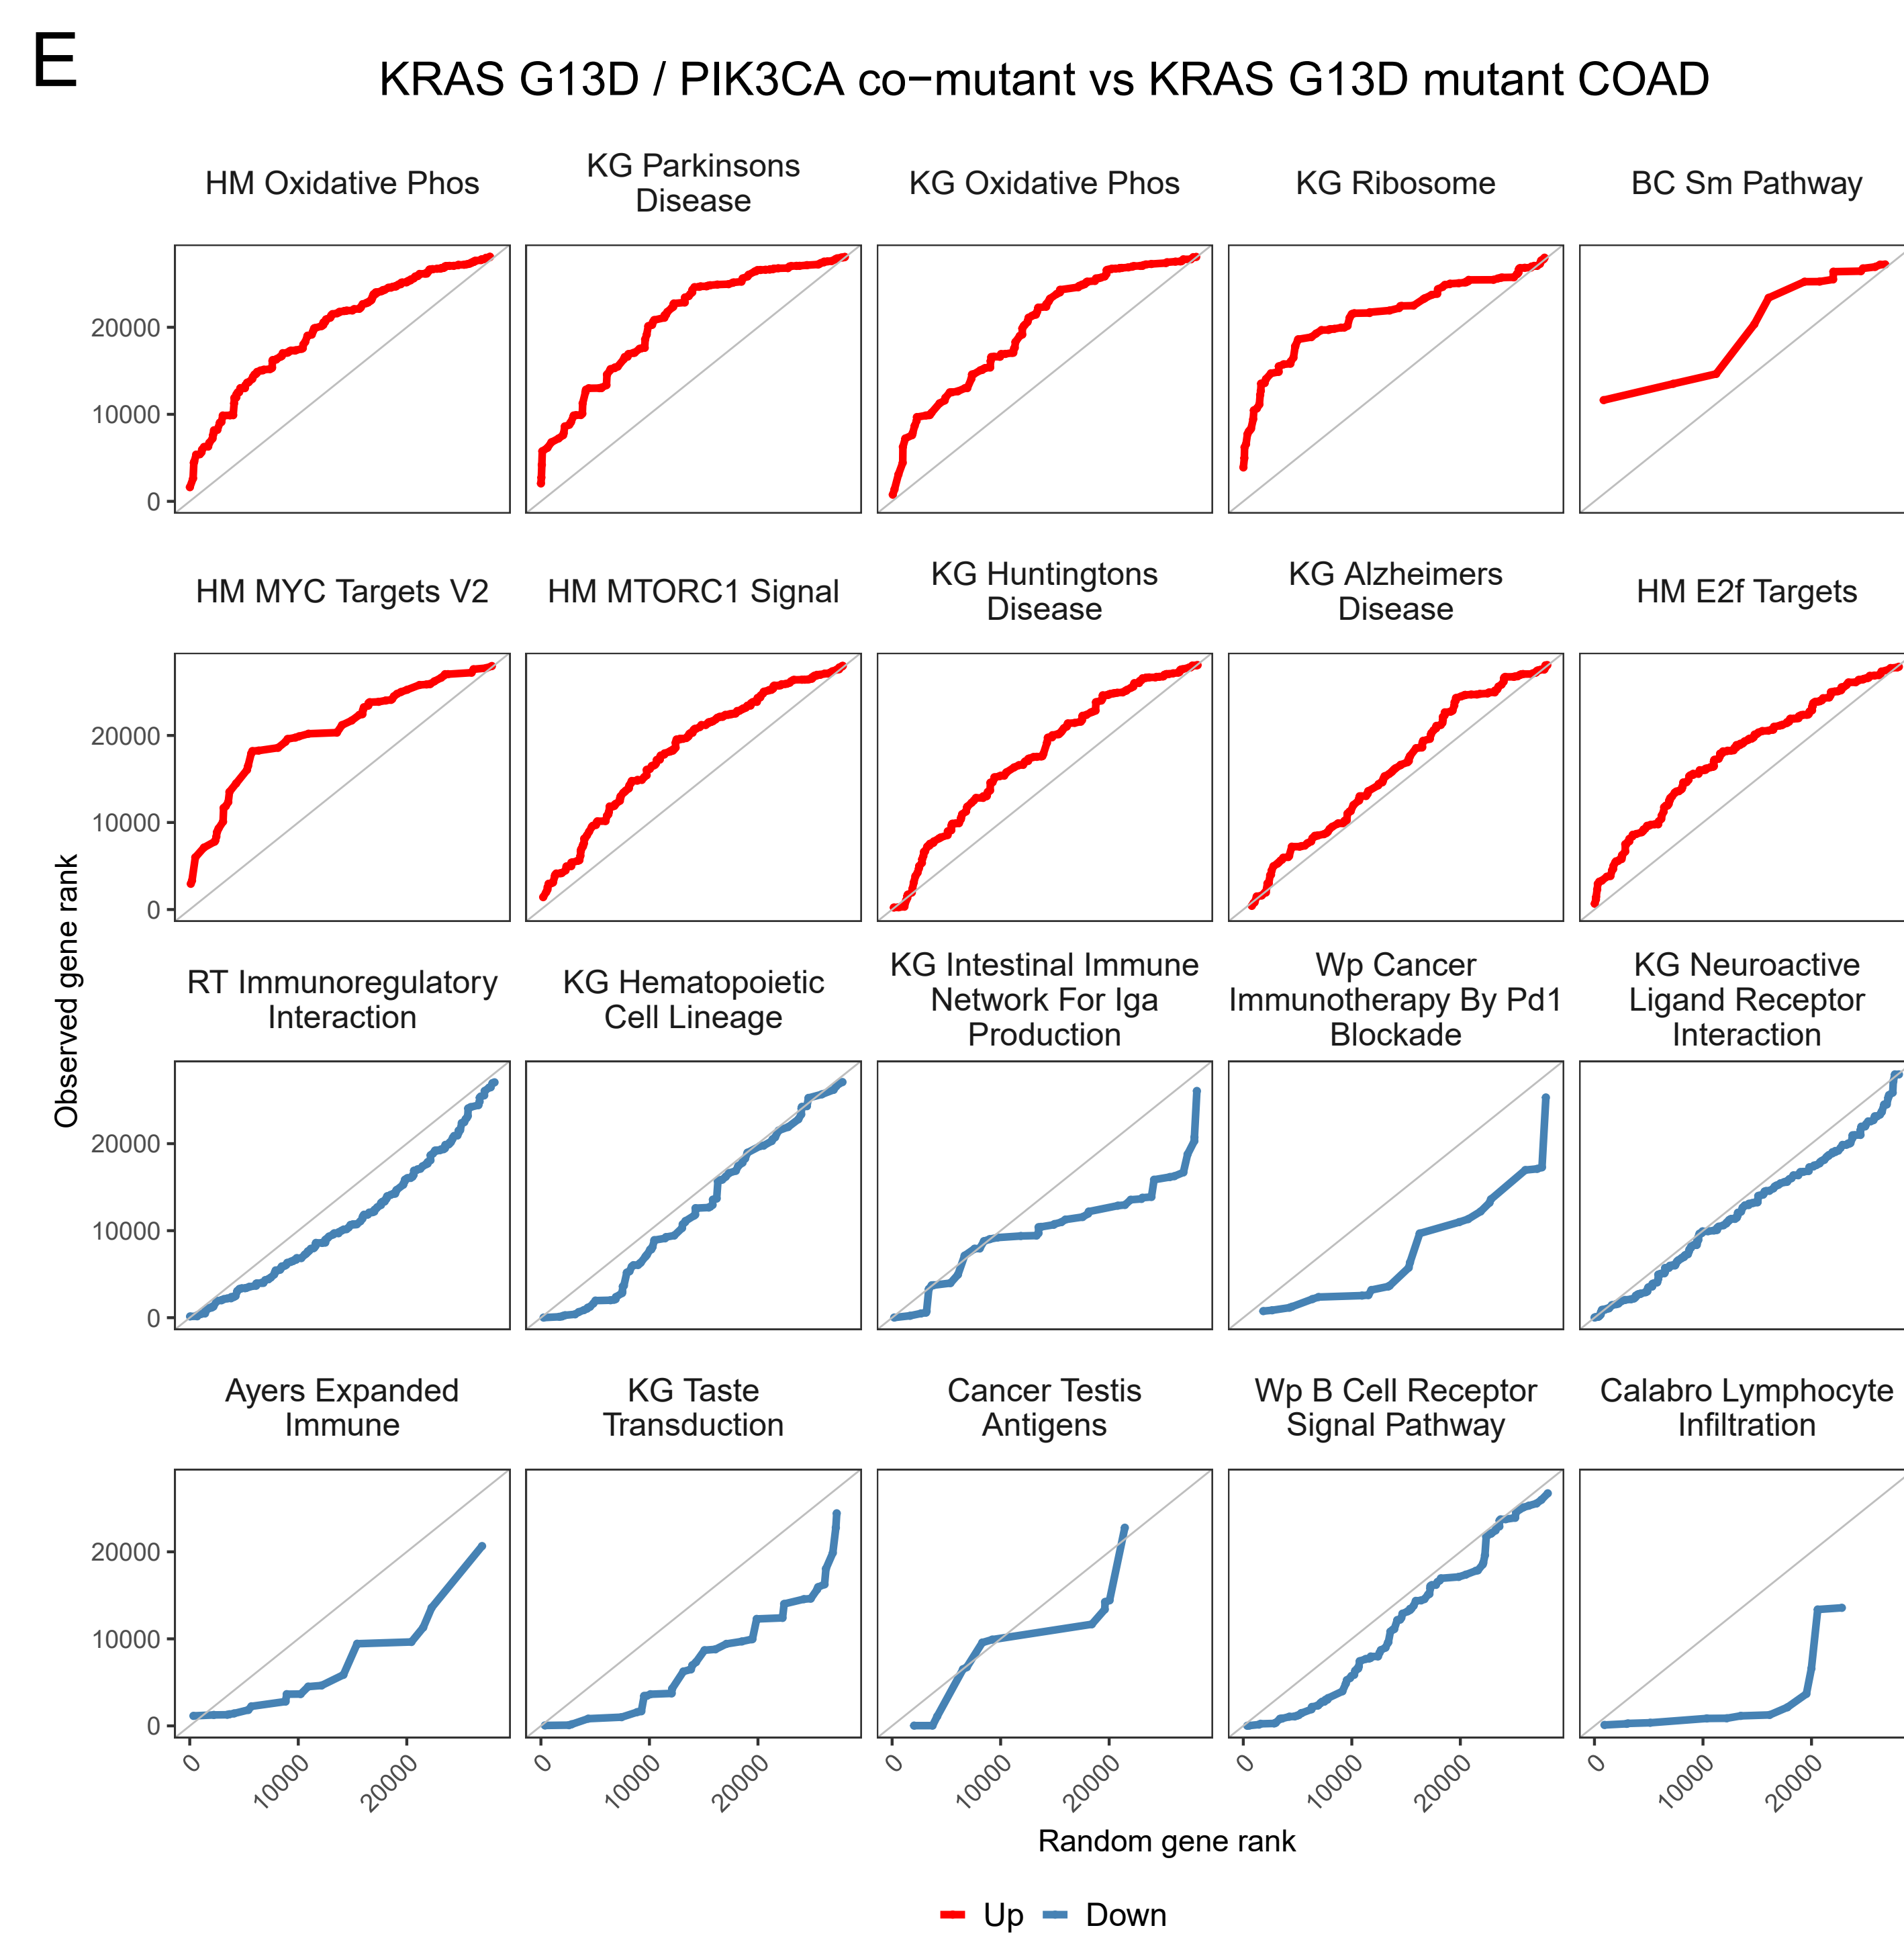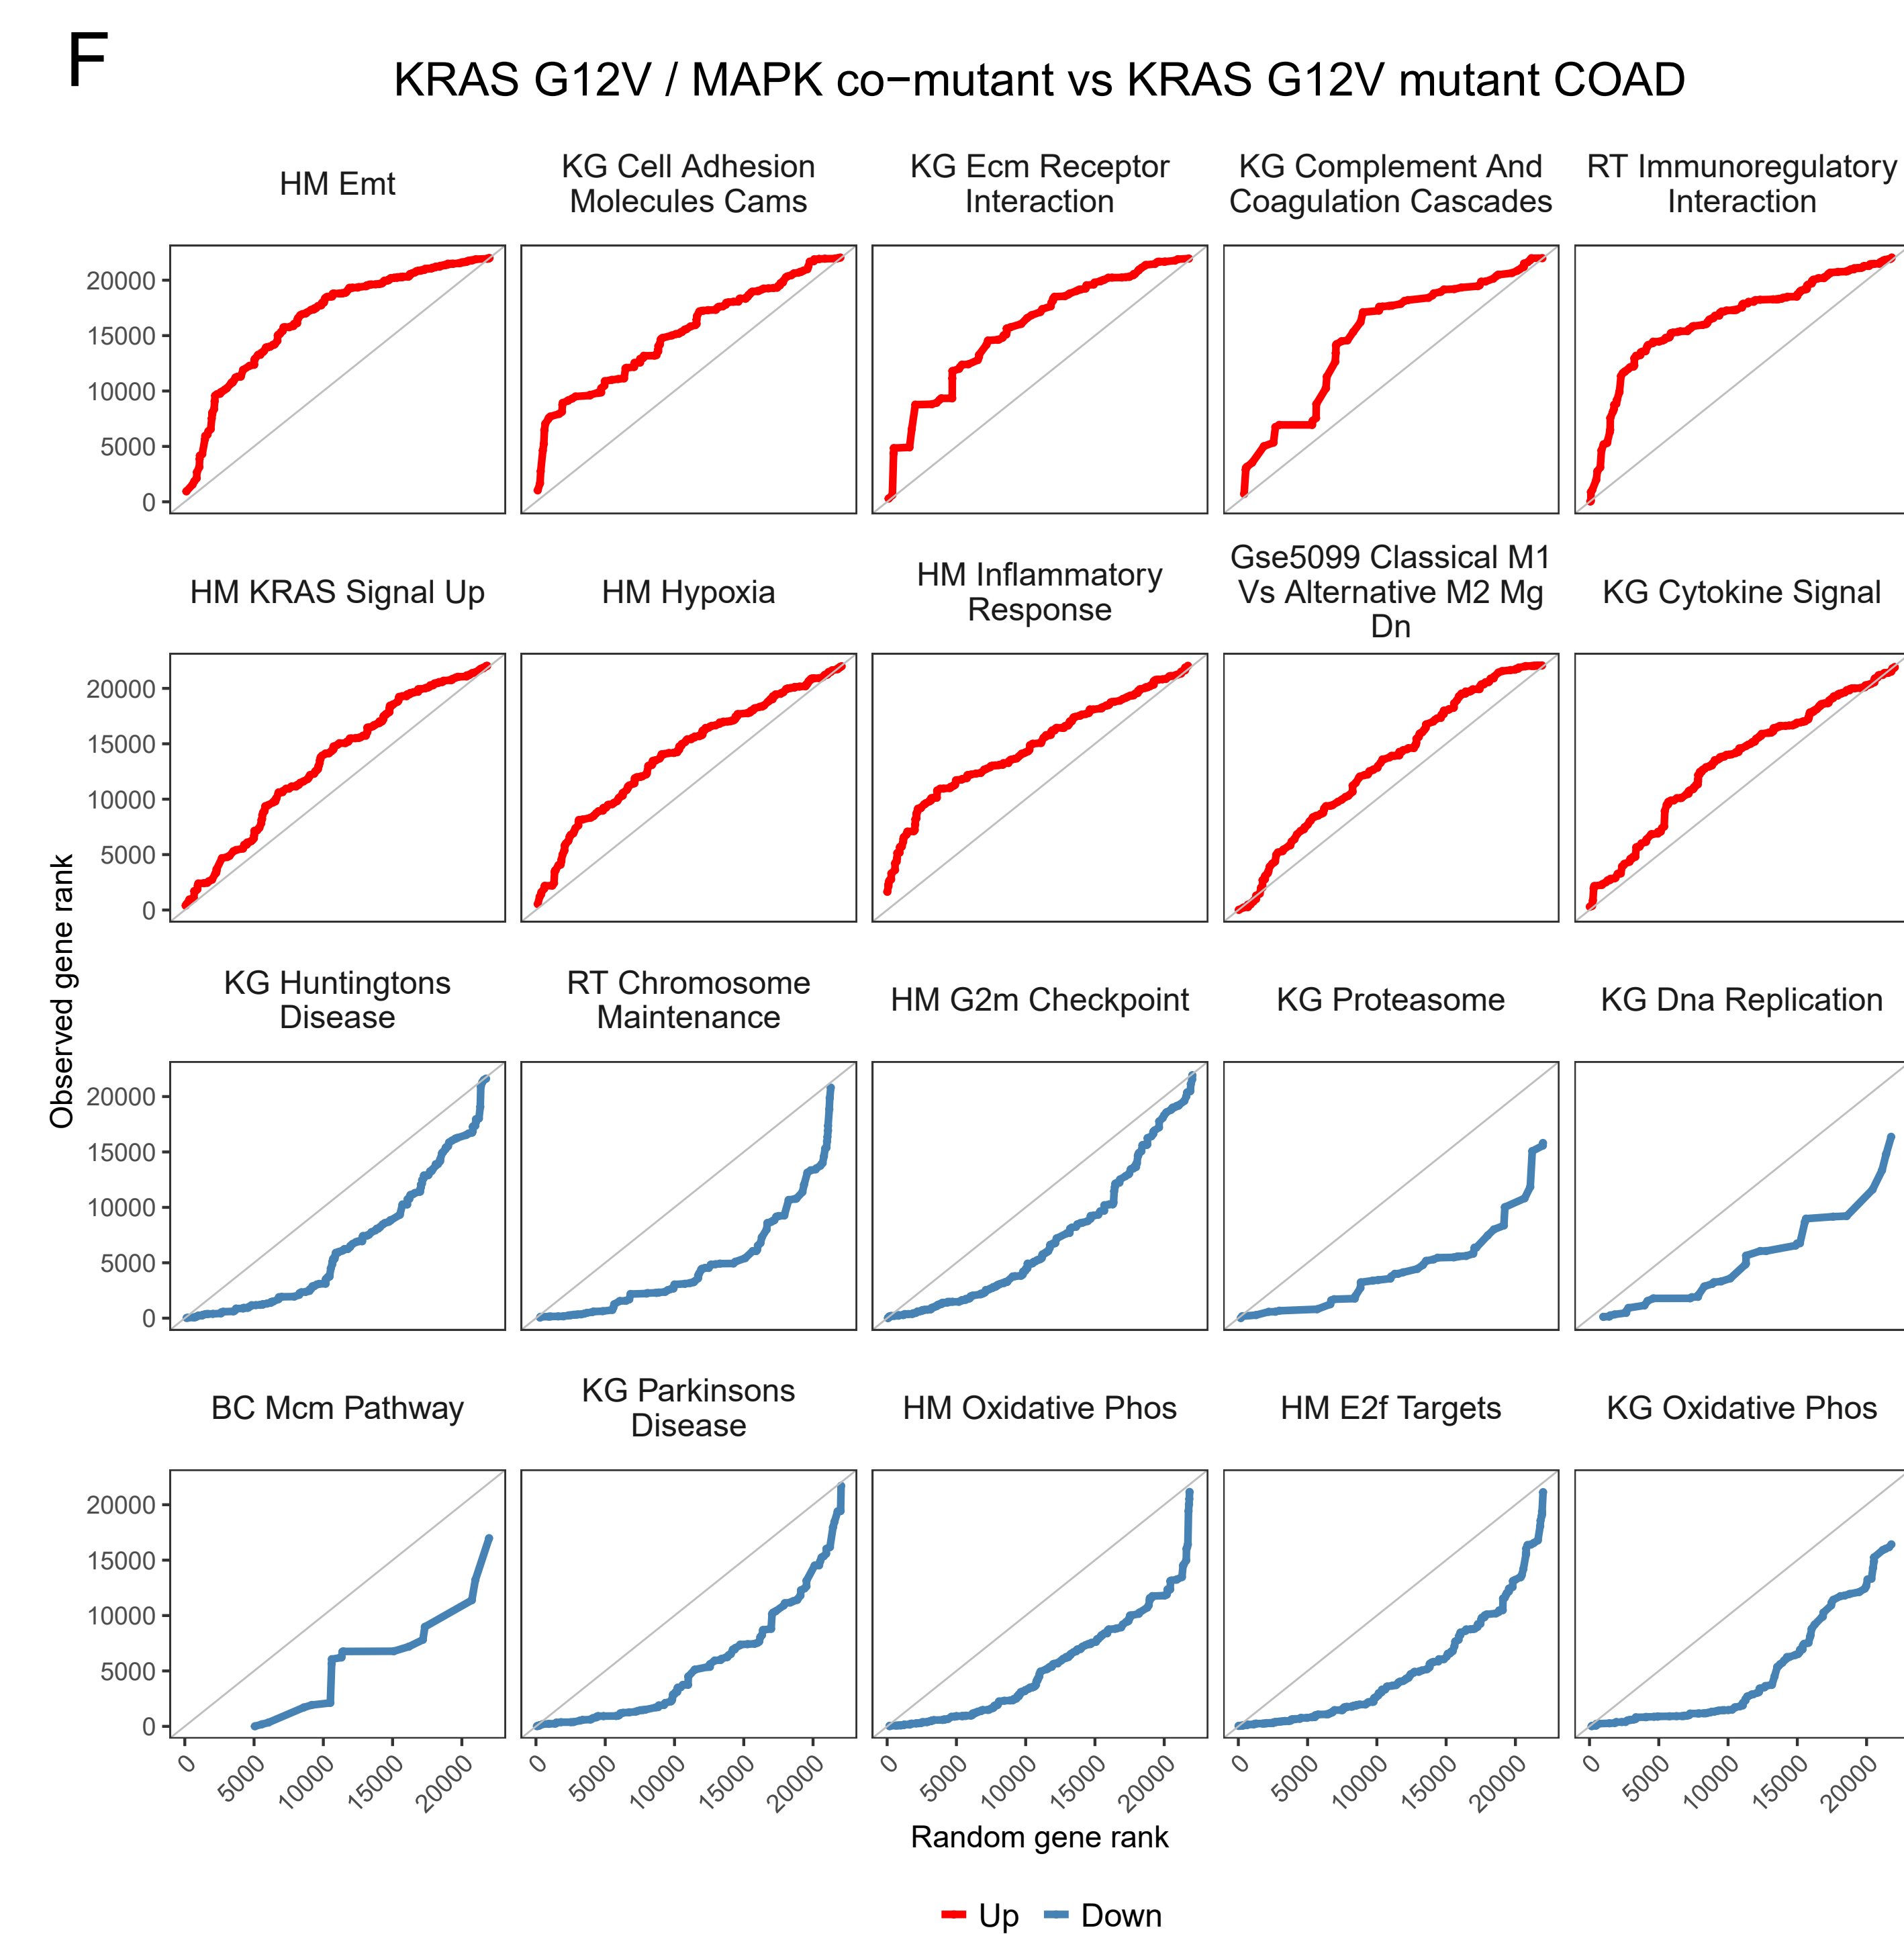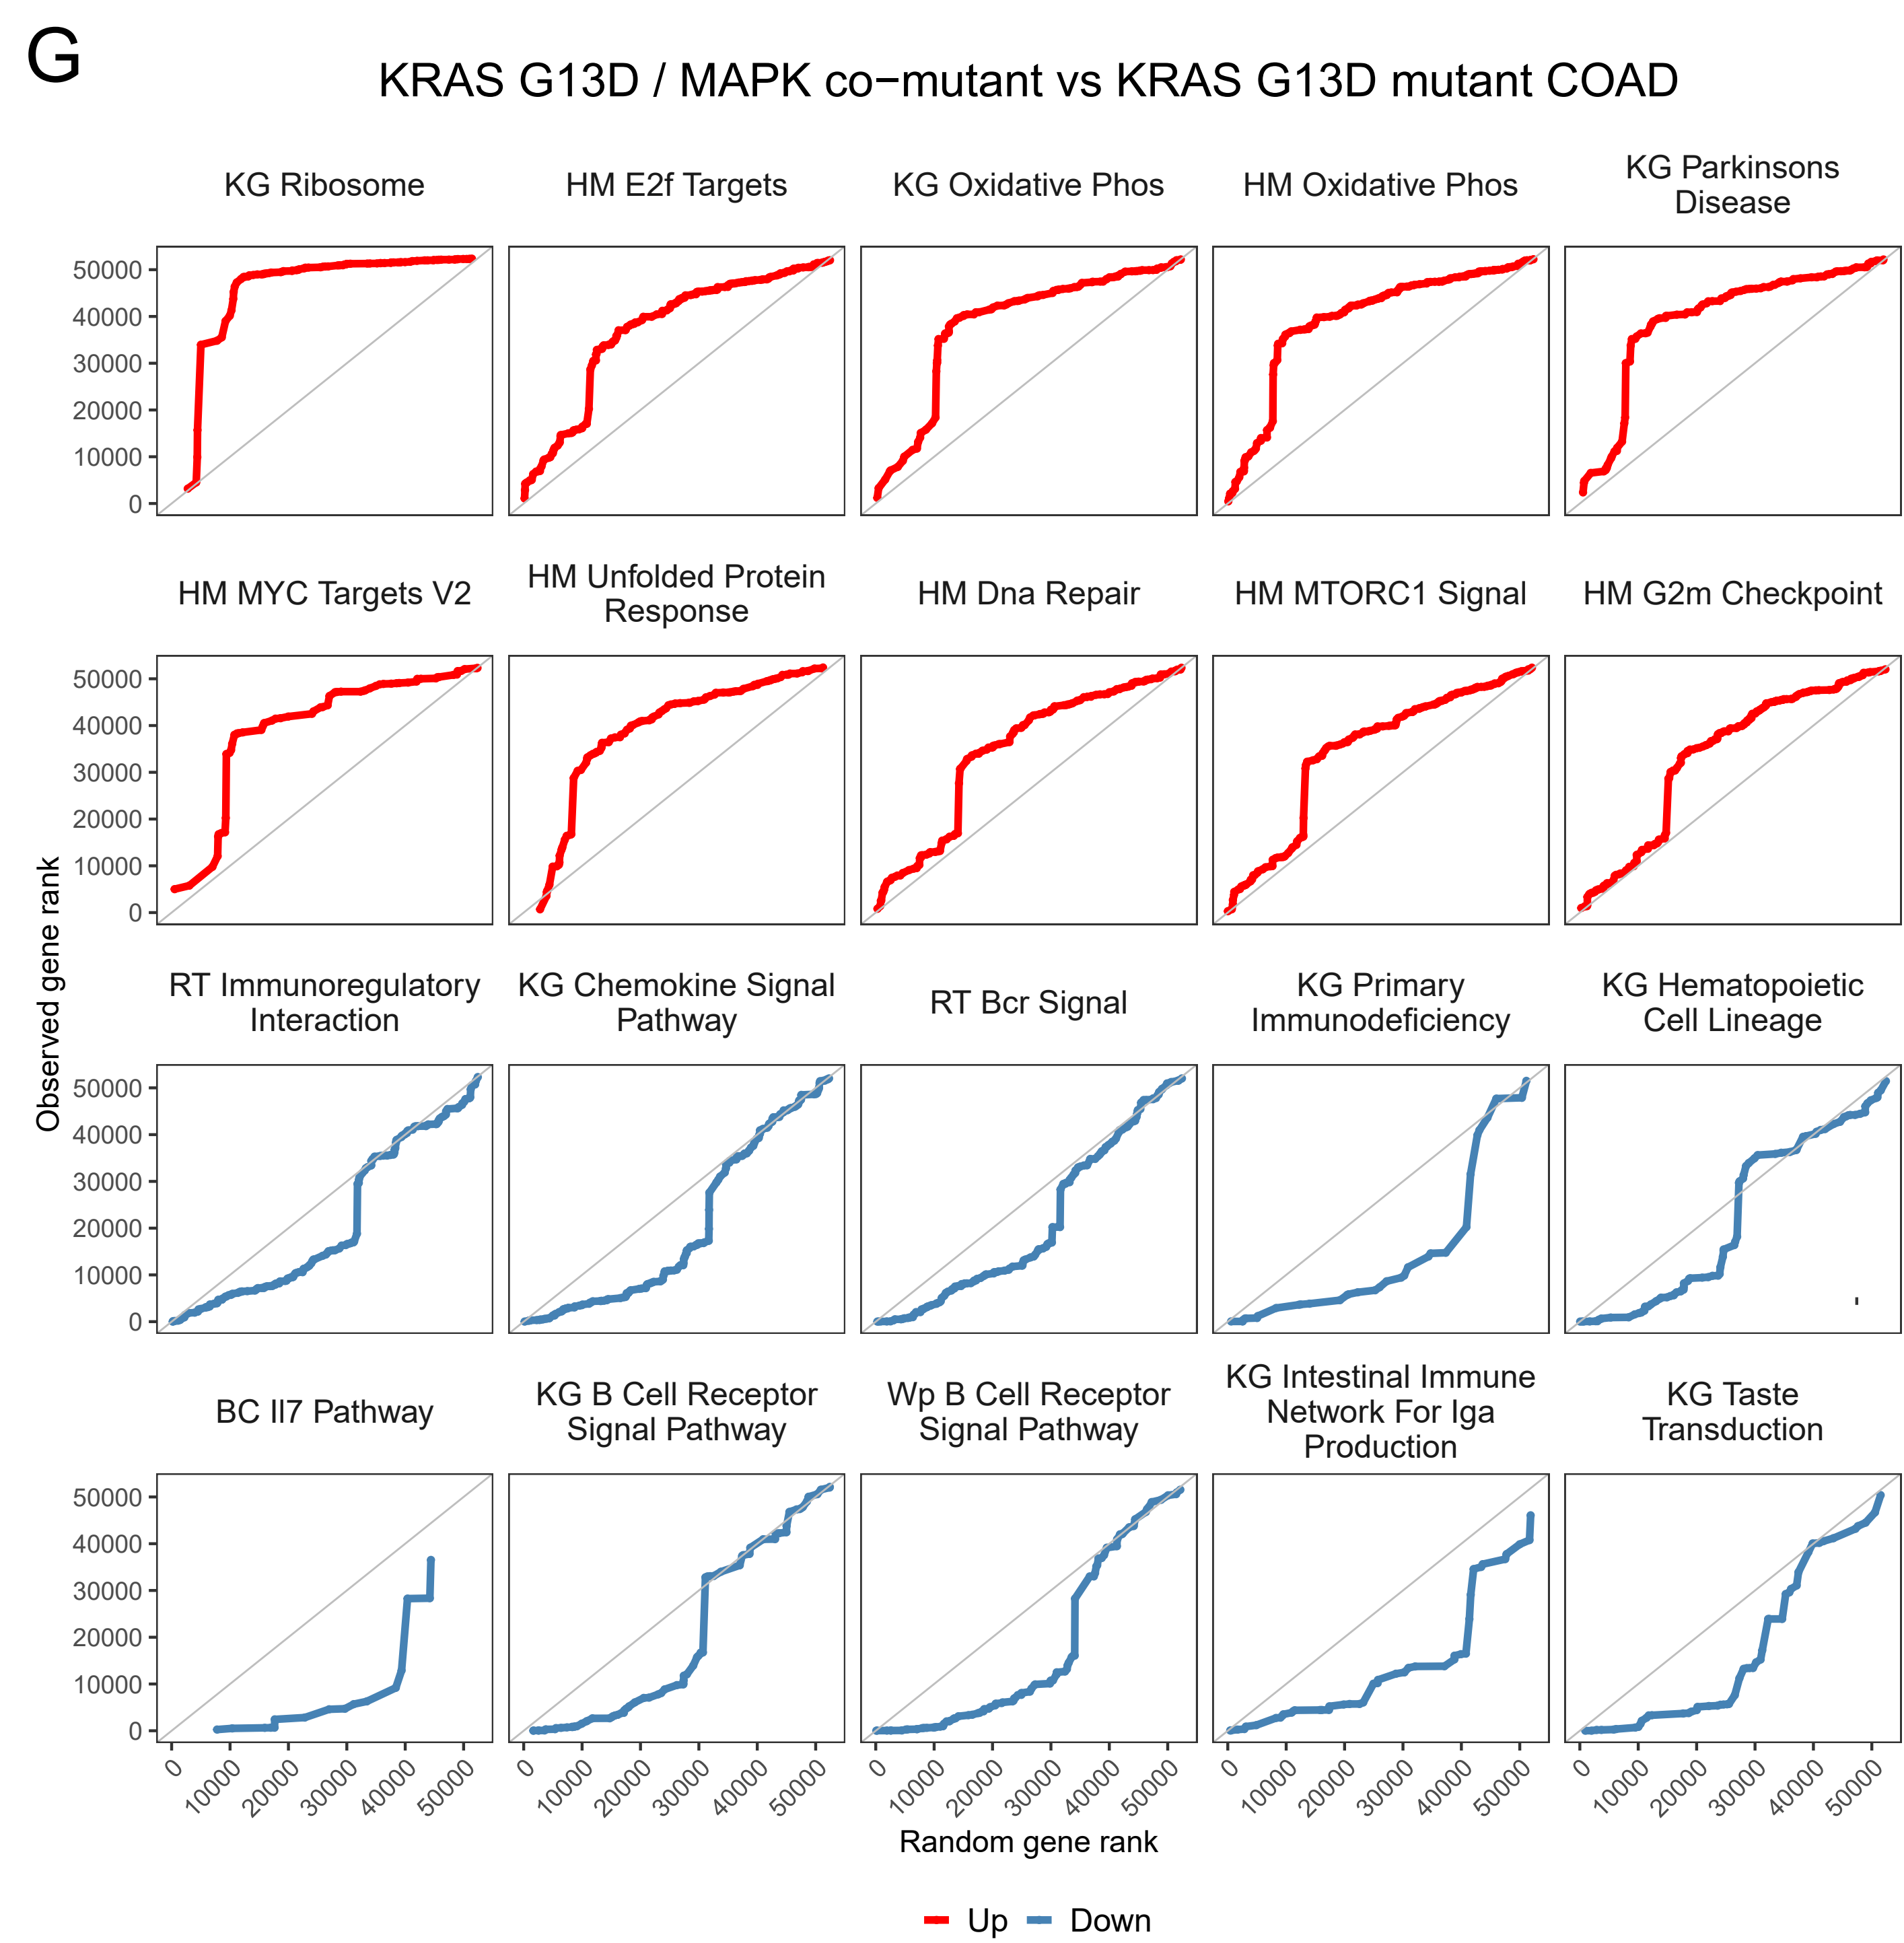

Supplement: can-22-1731_supplementary_fig.s18_supp18.pdf [file can-22-1731_supplementary_fig.s18_supp18.pdf]

# Supplementary Figure S19

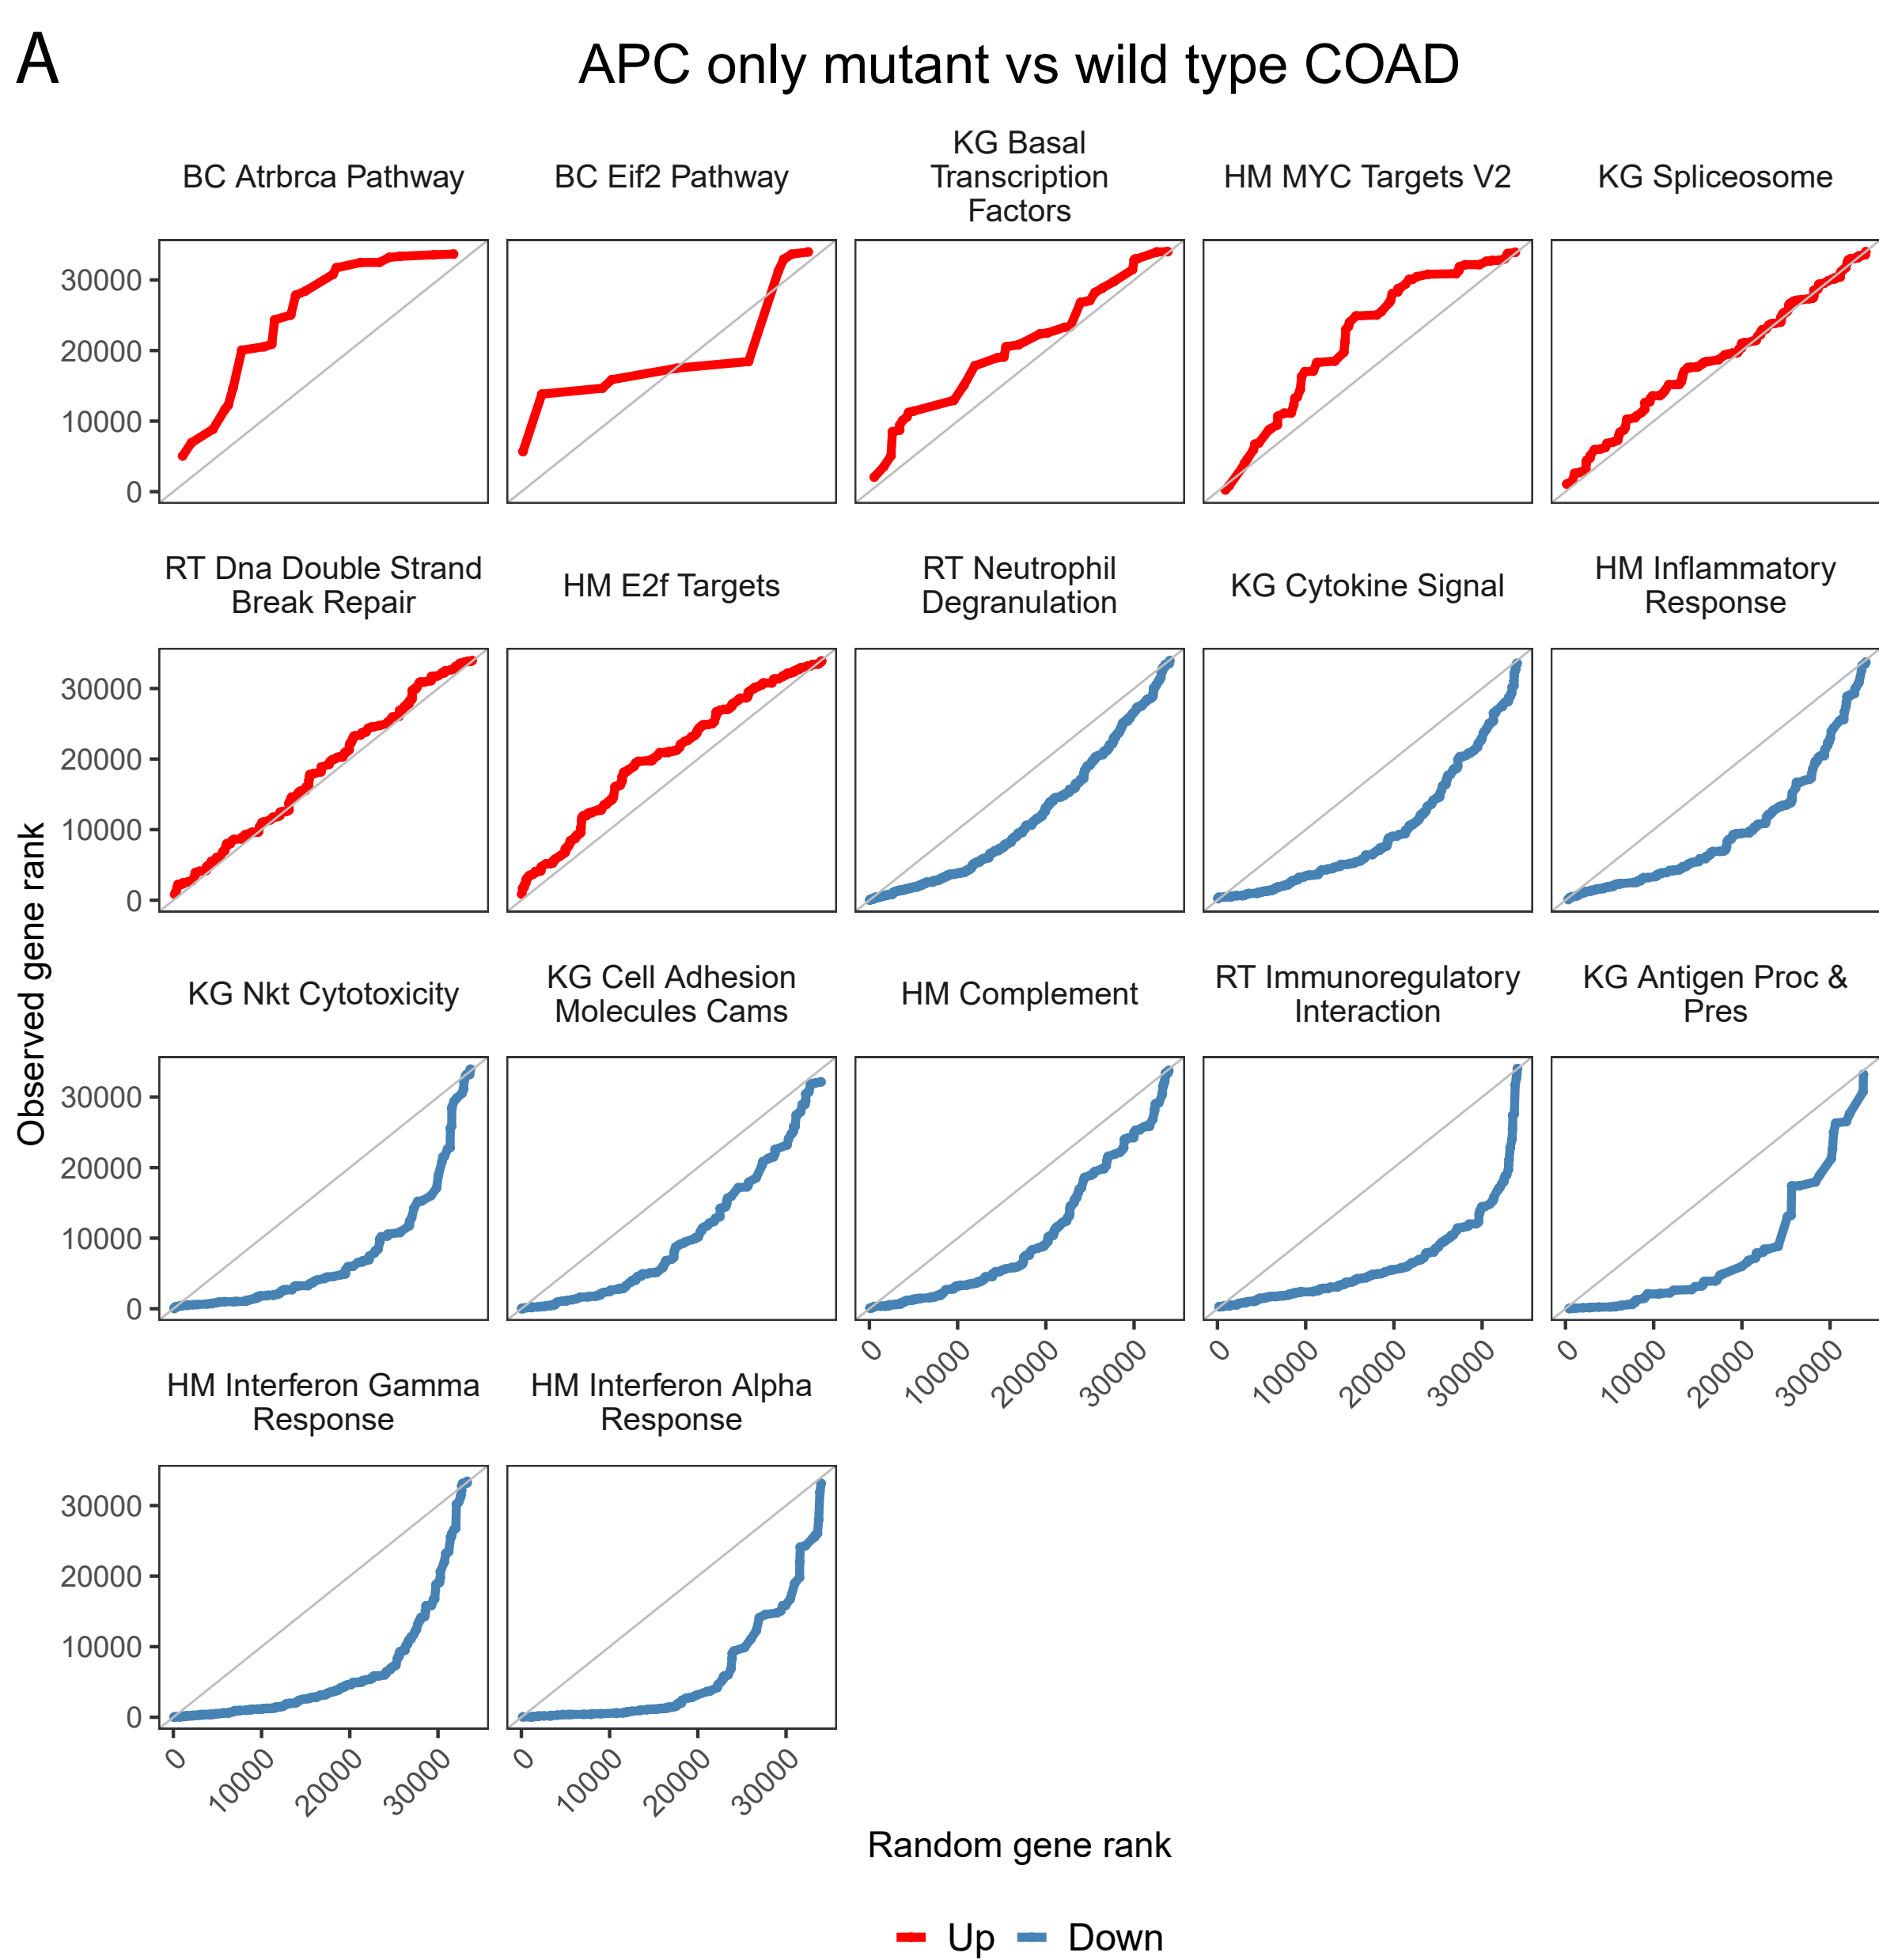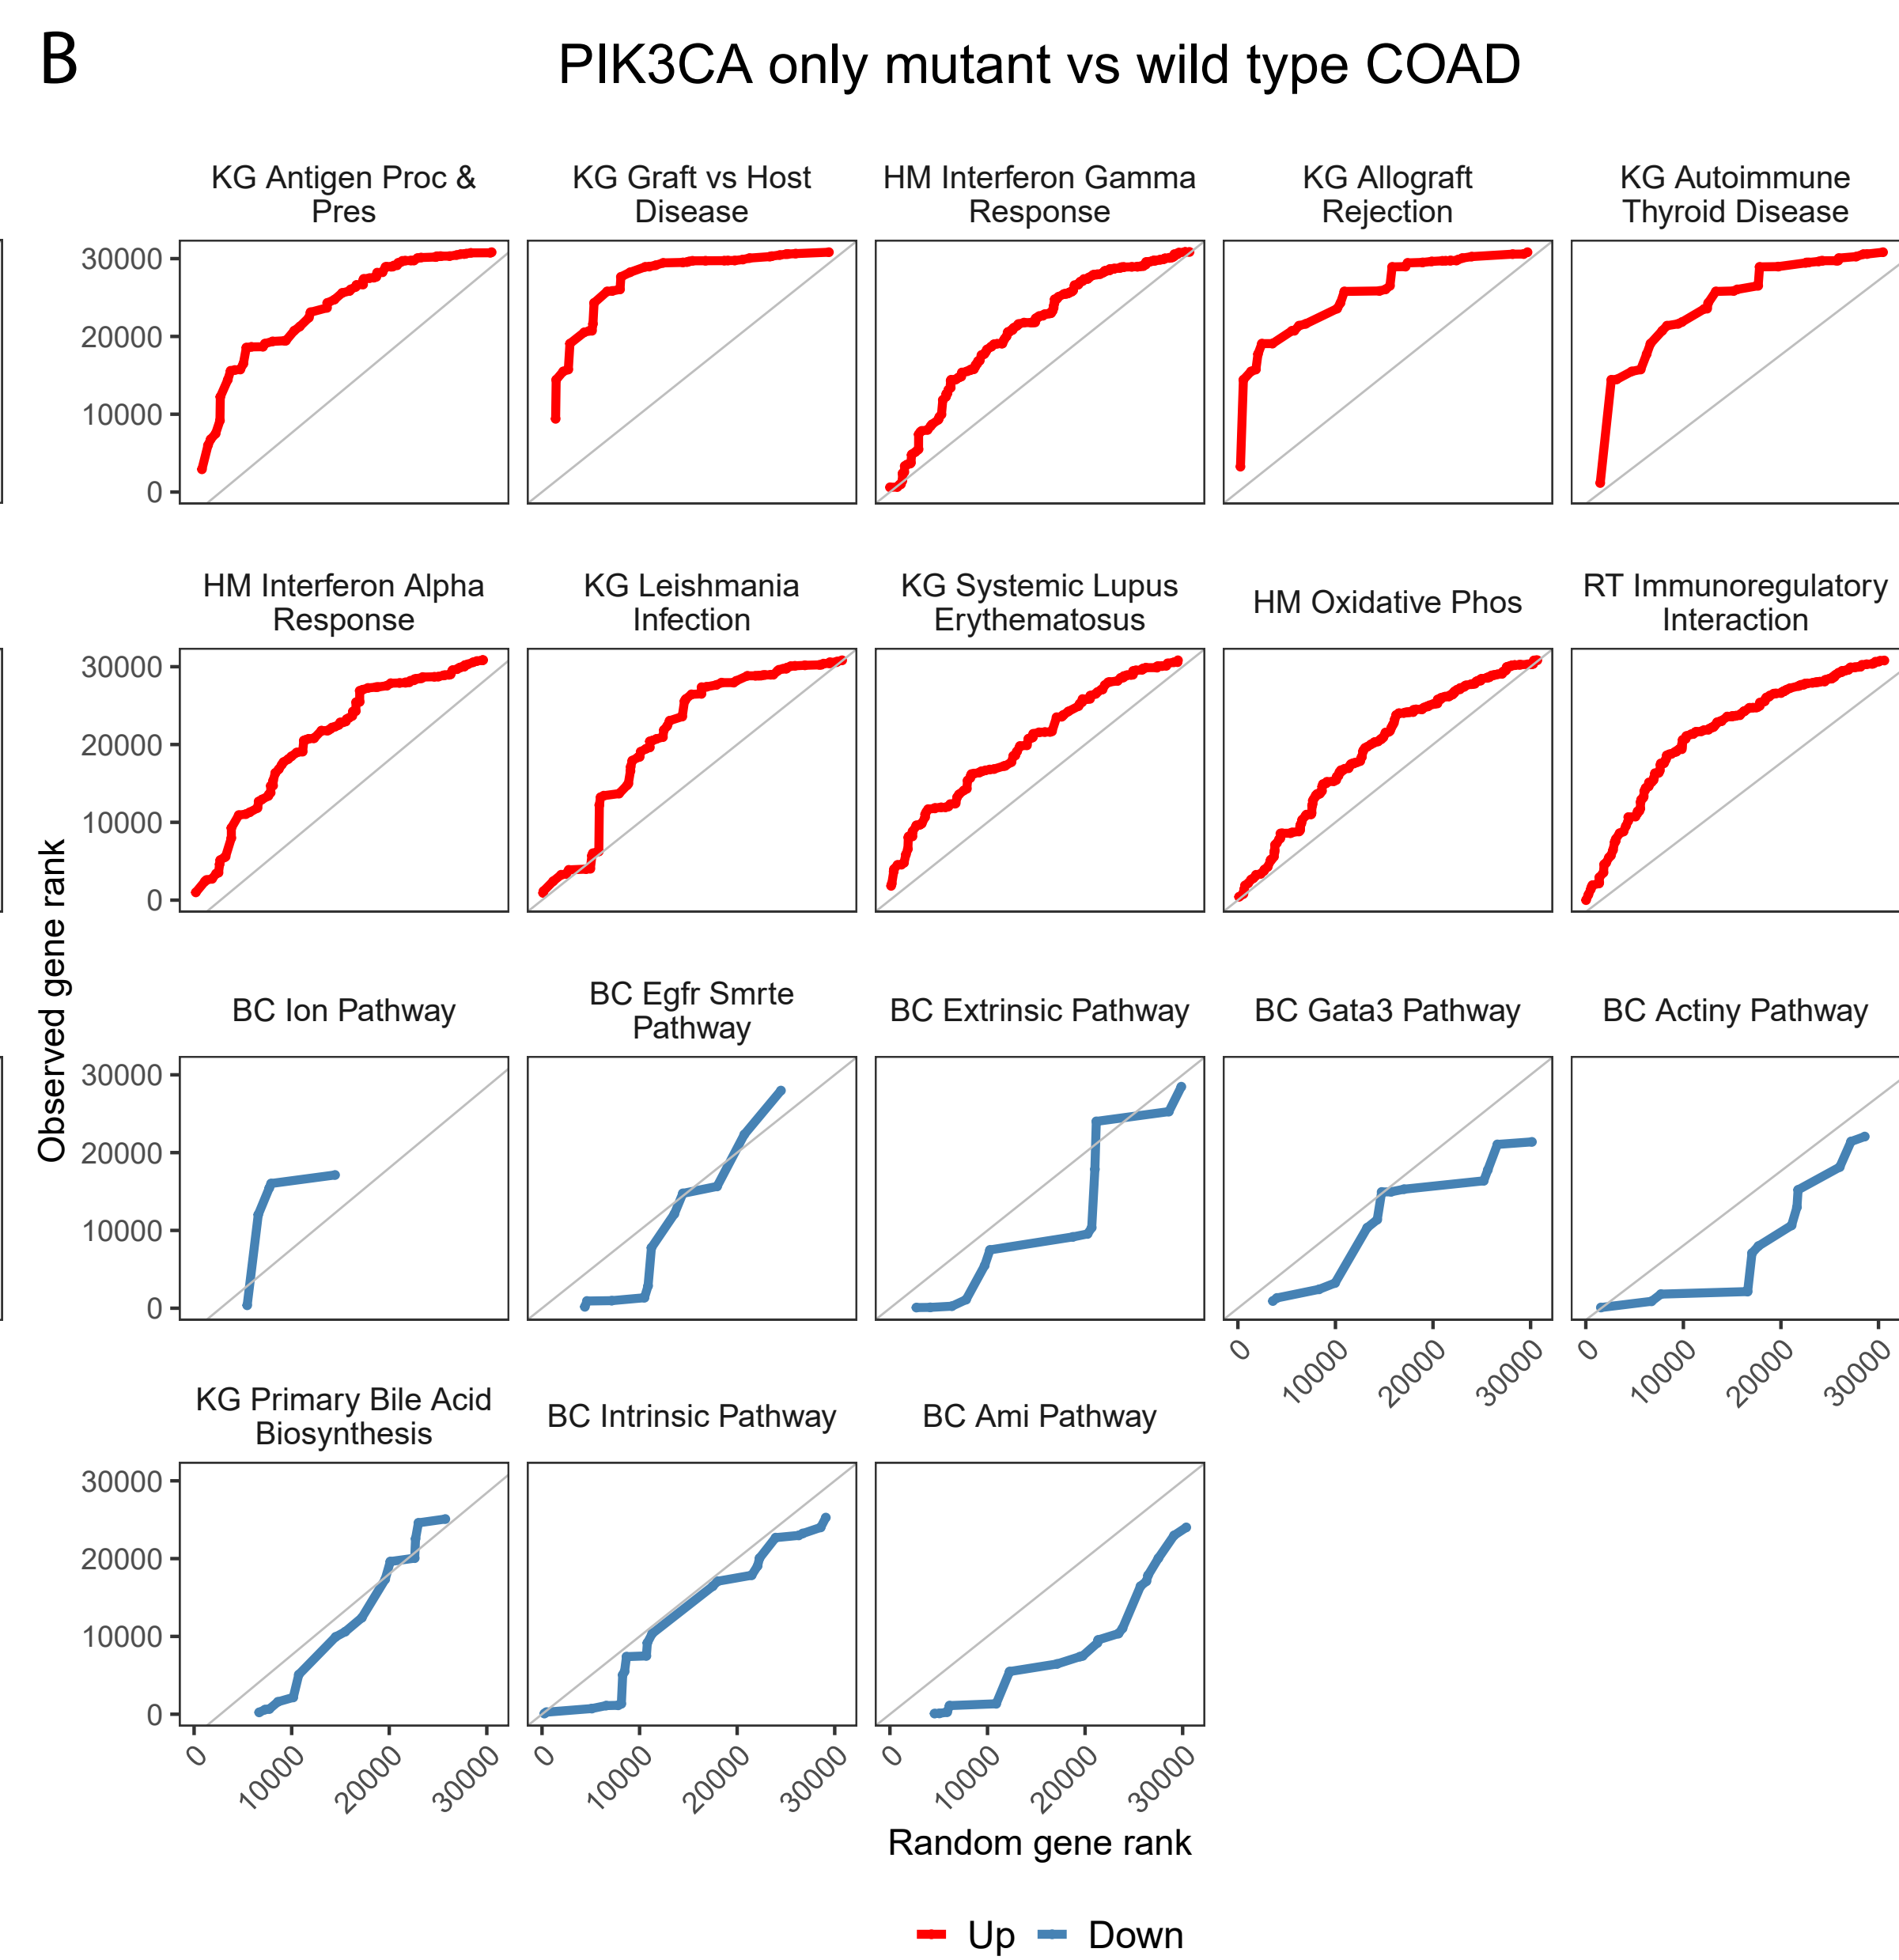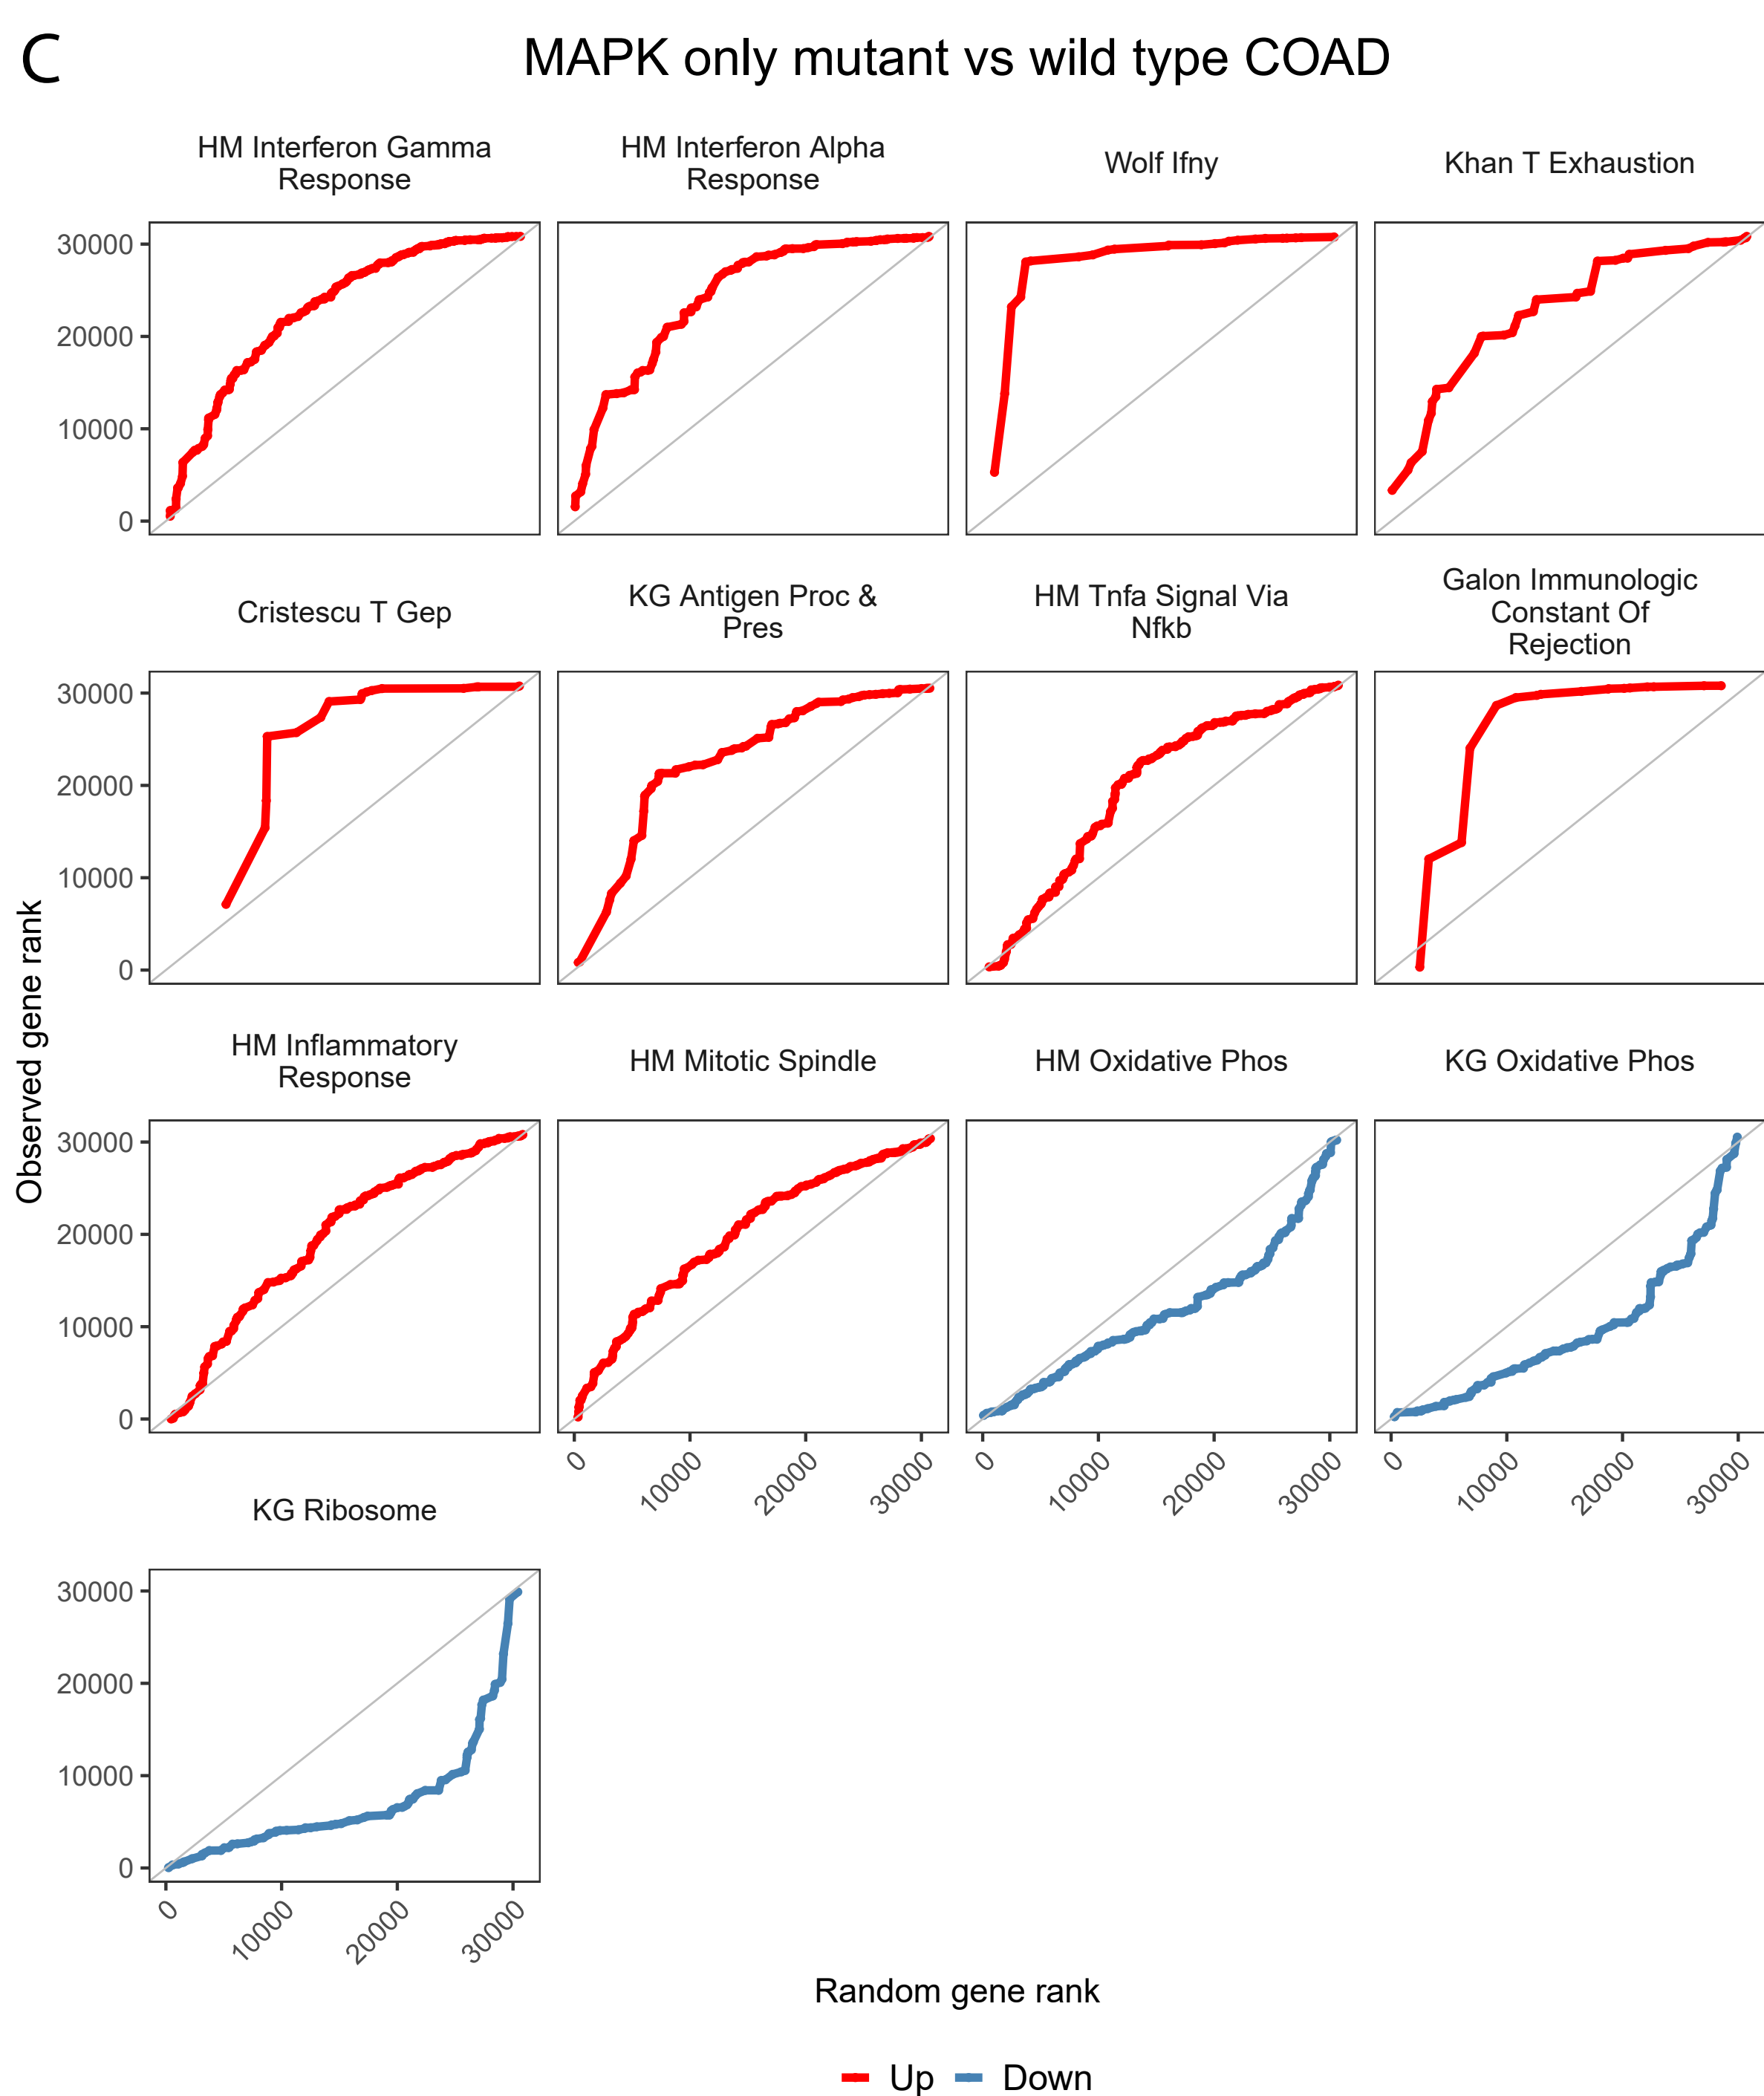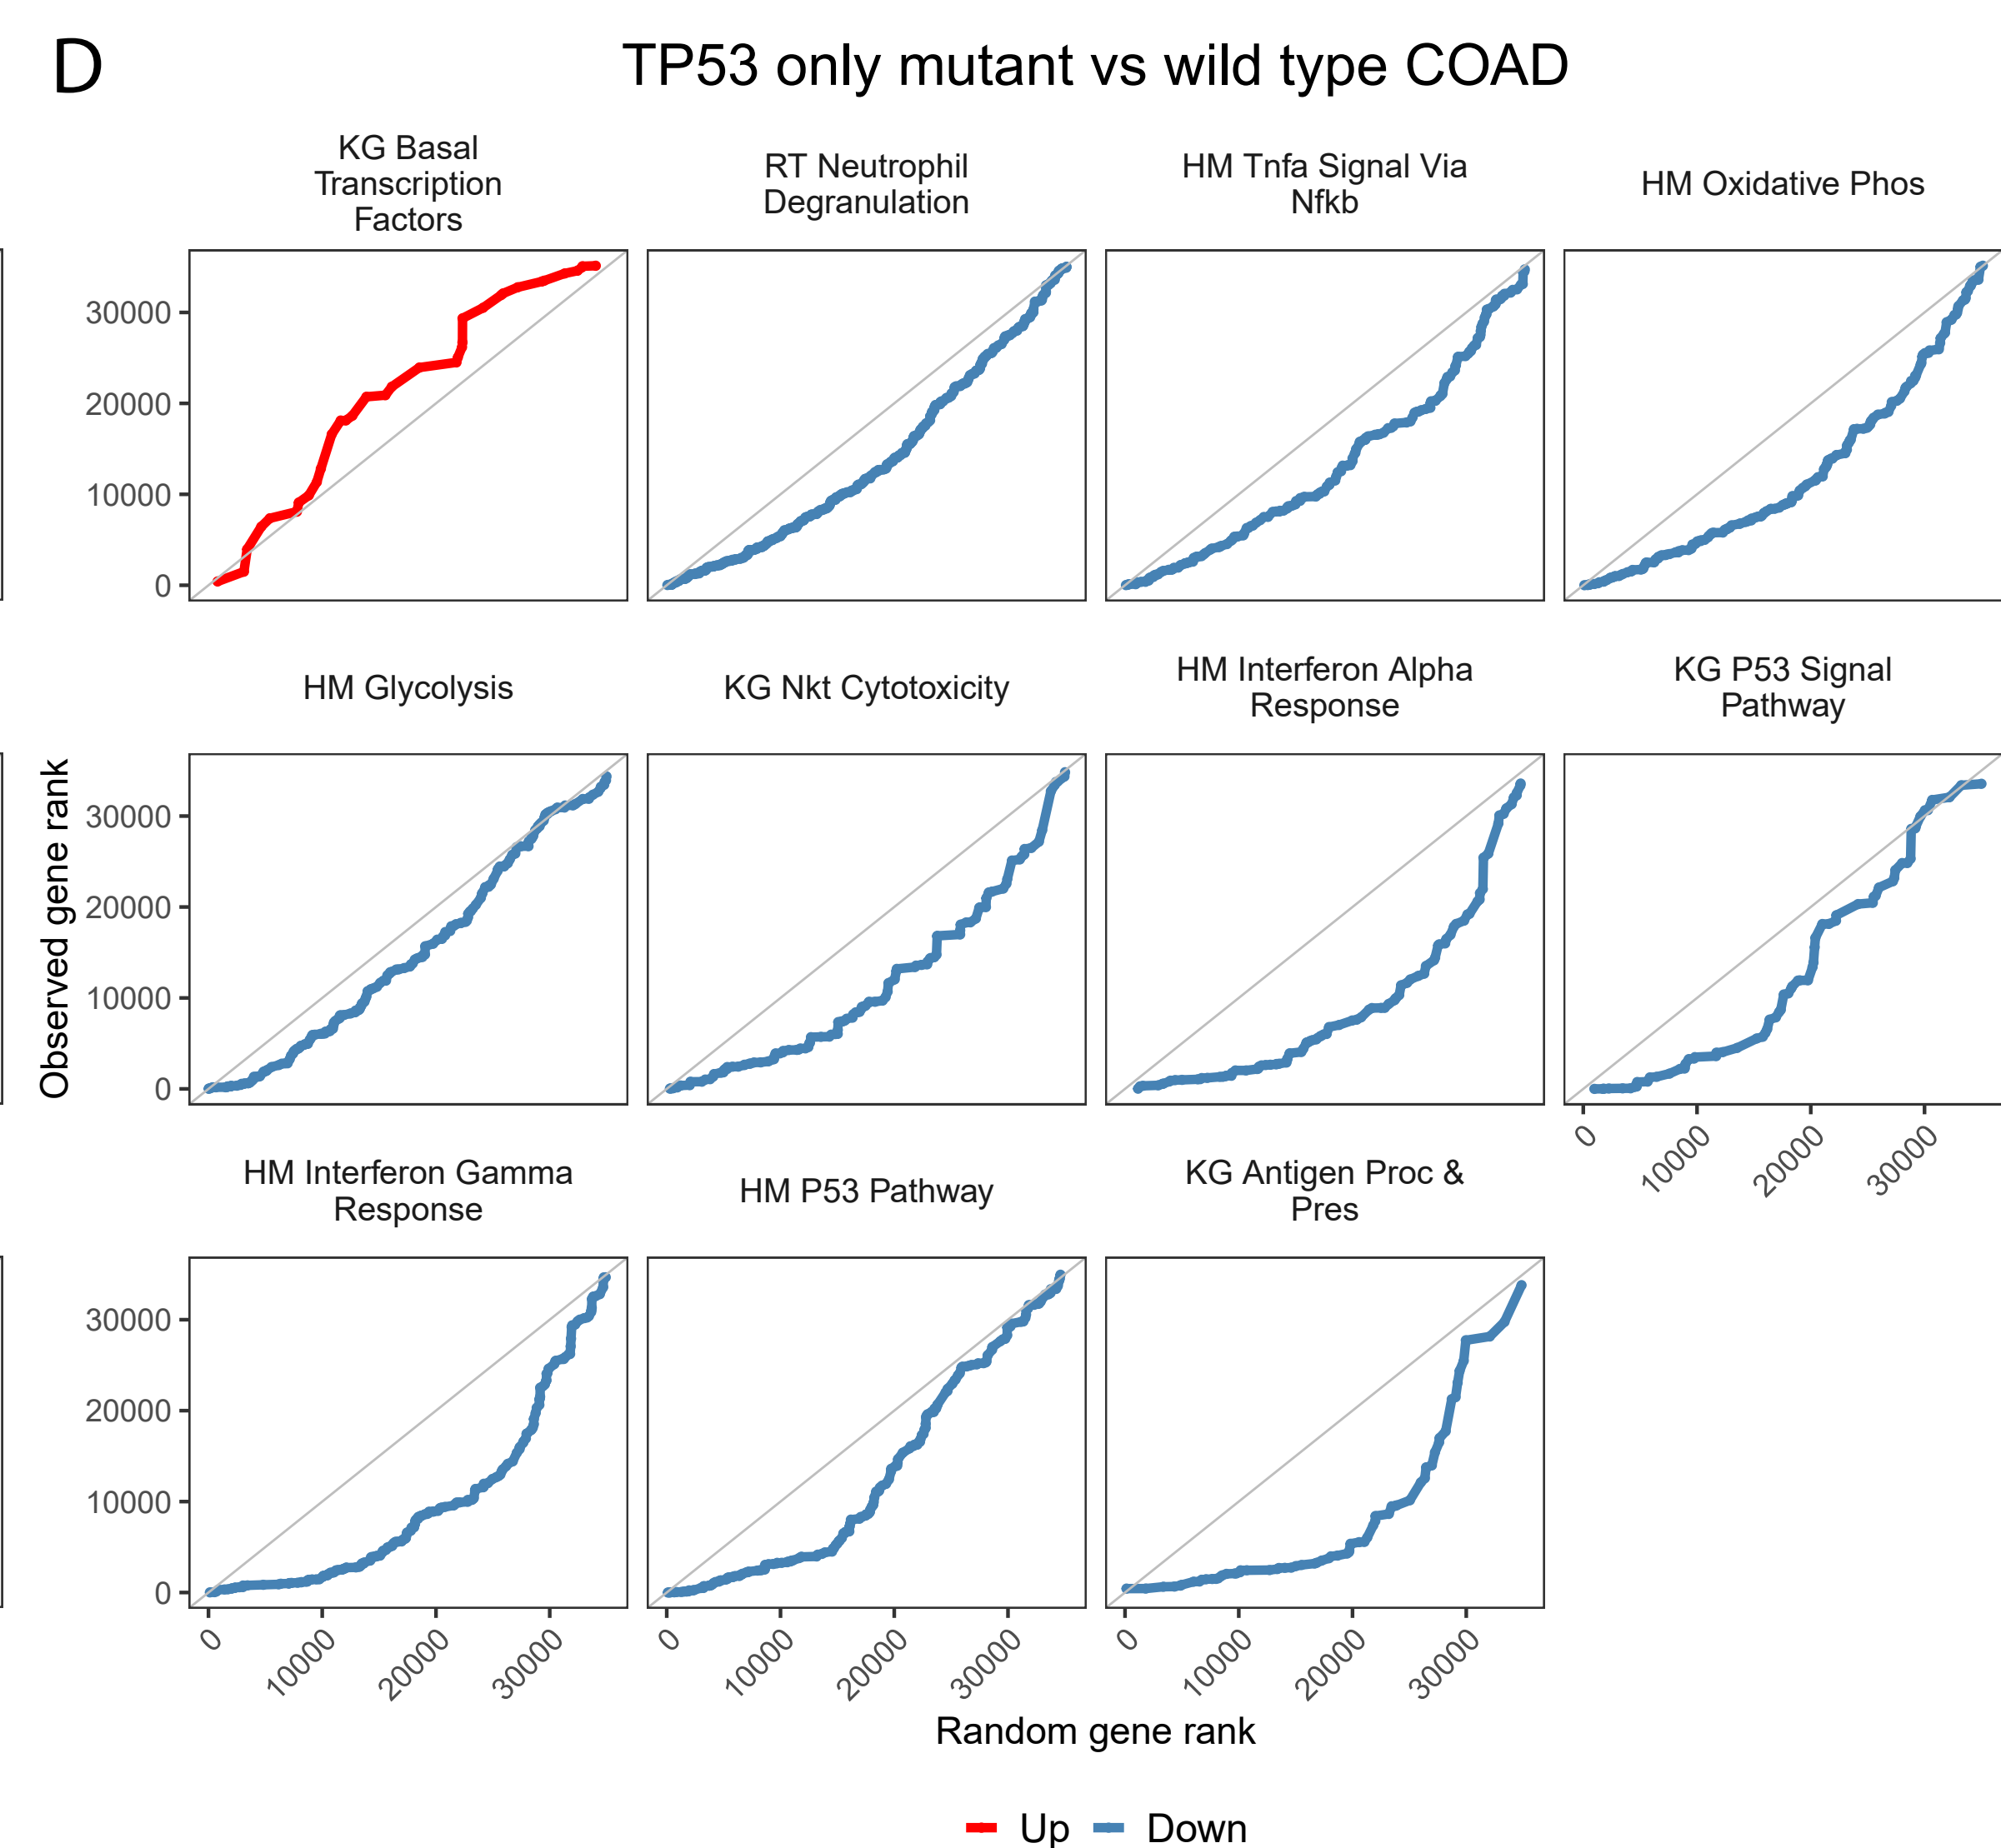

Supplement: can-22-1731_supplementary_fig.s19_supp19.pdf [file can-22-1731_supplementary_fig.s19_supp19.pdf]

Supplementary Figure S1

All patients

Matched N

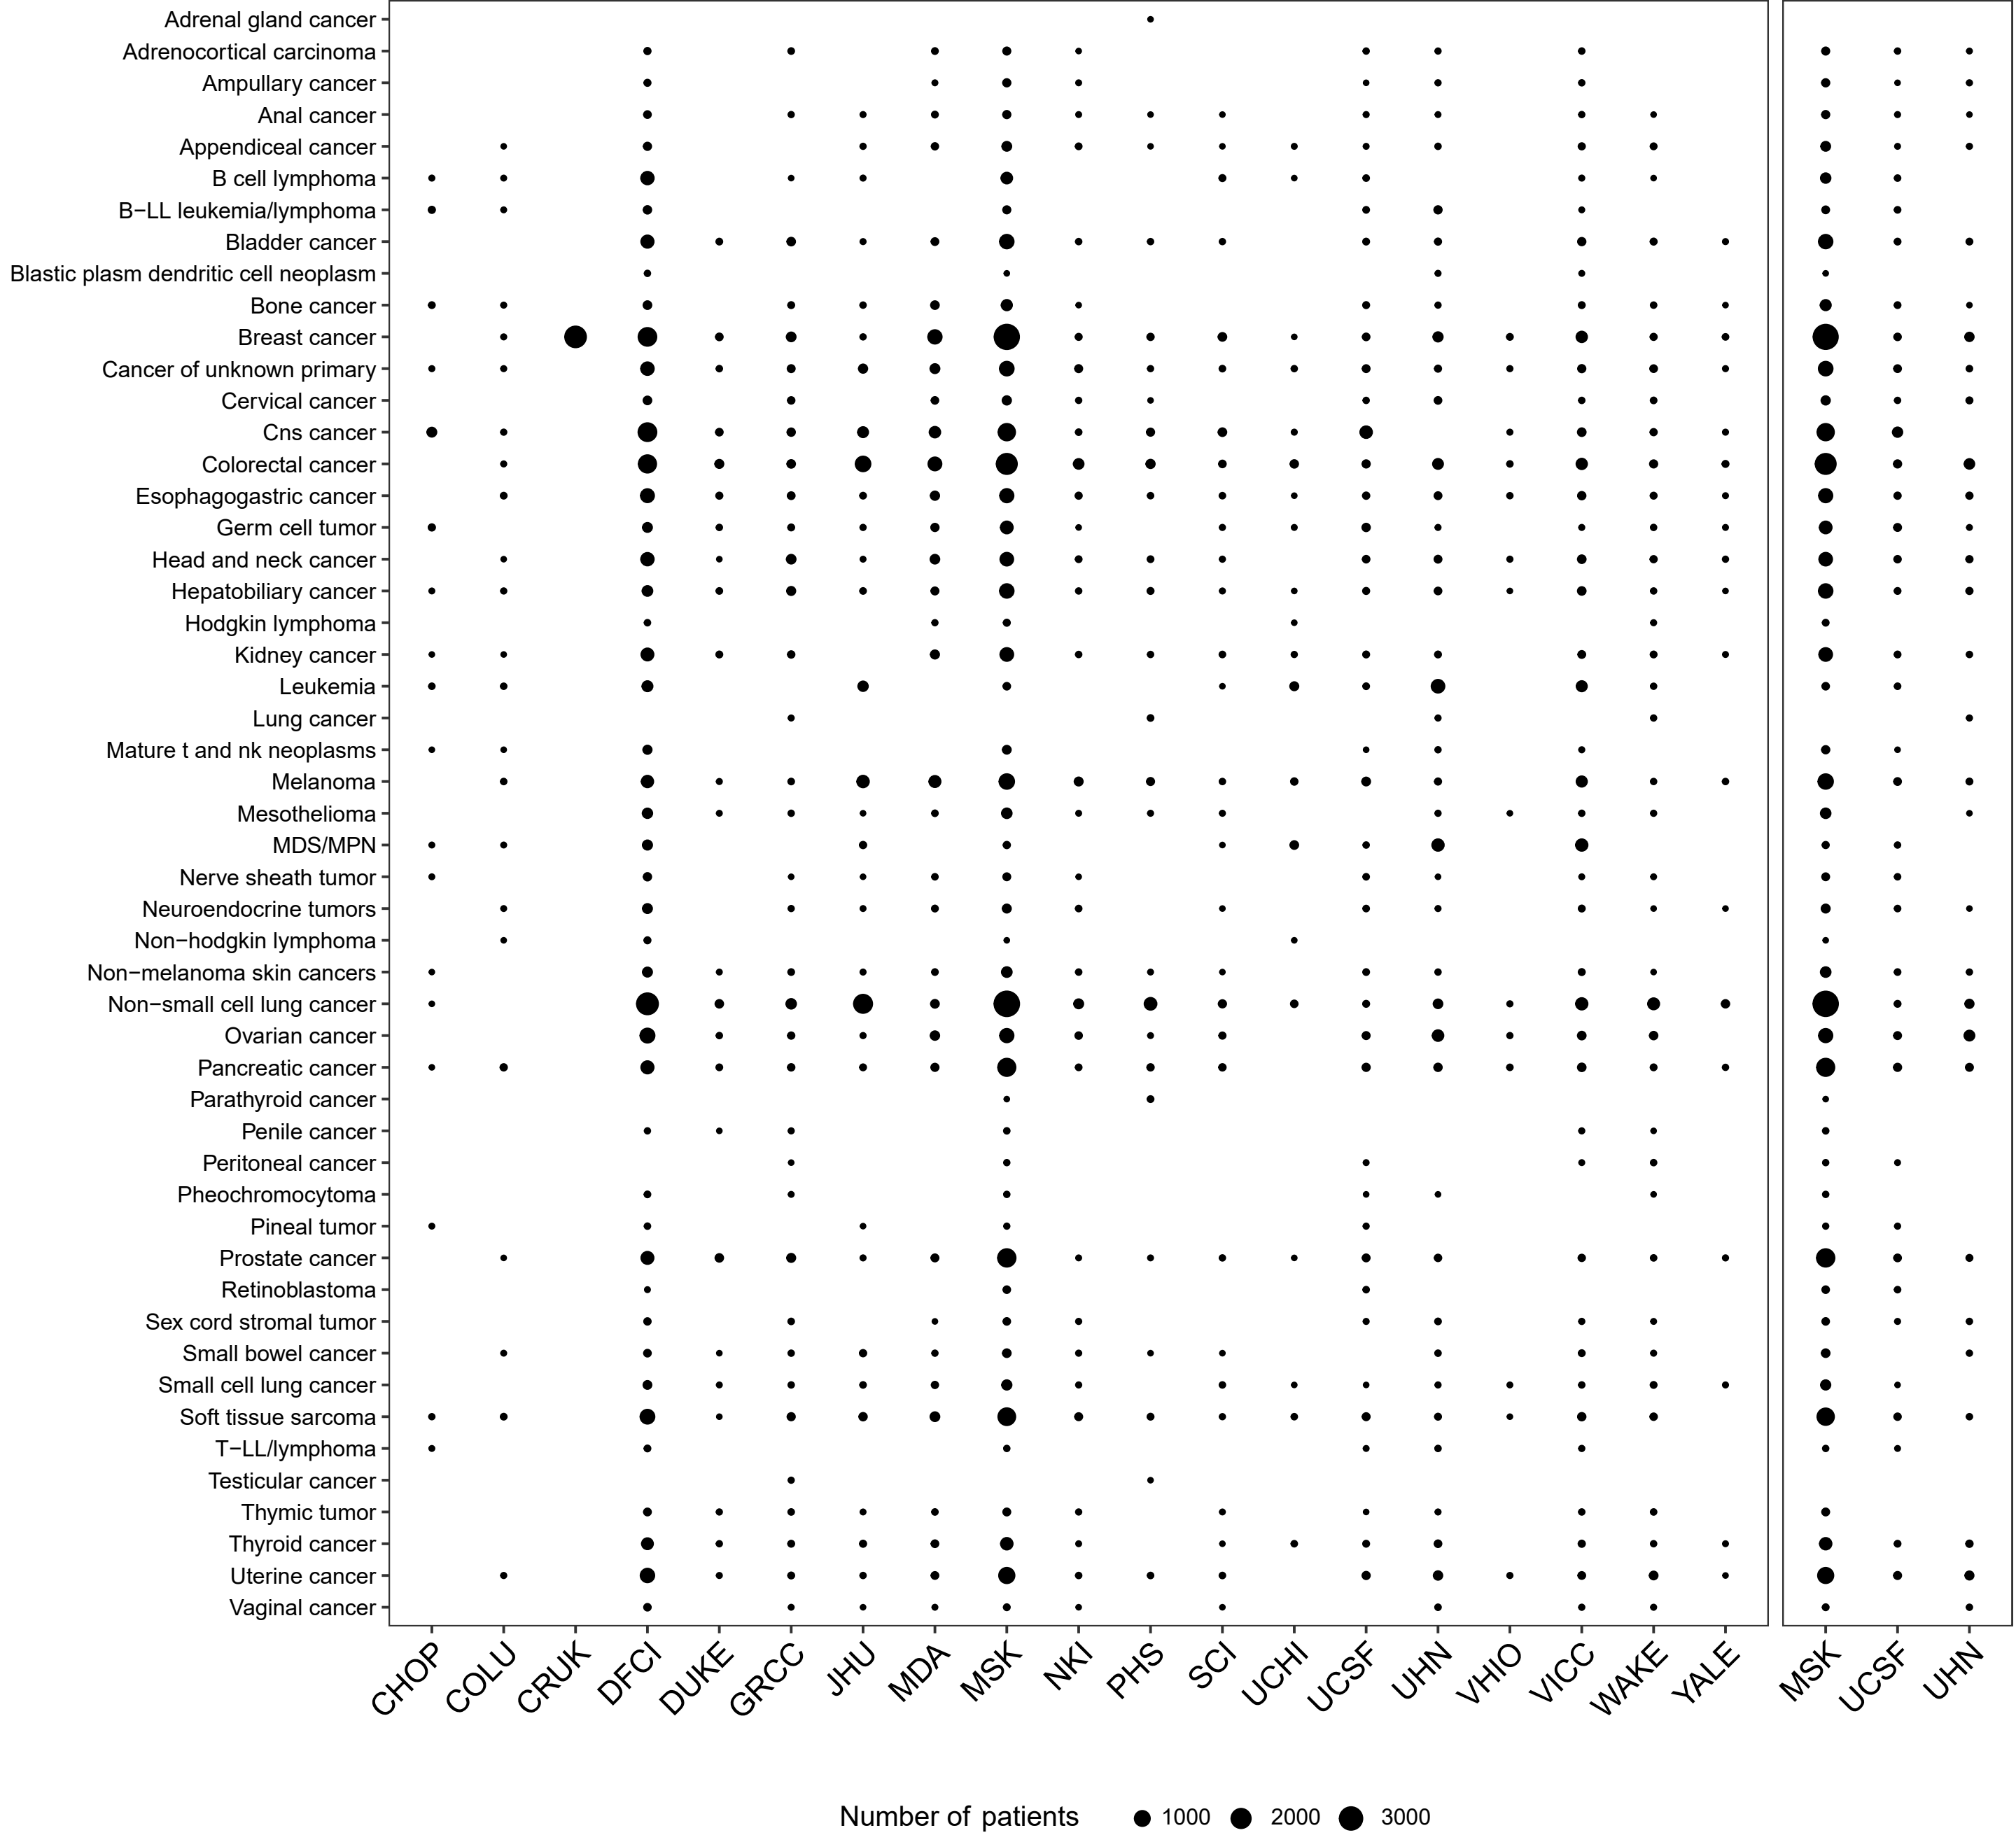

Number of patients ● 1000 ● 2000 ● 3000

Supplement: can-22-1731_supplementary_fig.s1_supp1.pdf [file can-22-1731_supplementary_fig.s1_supp1.pdf]

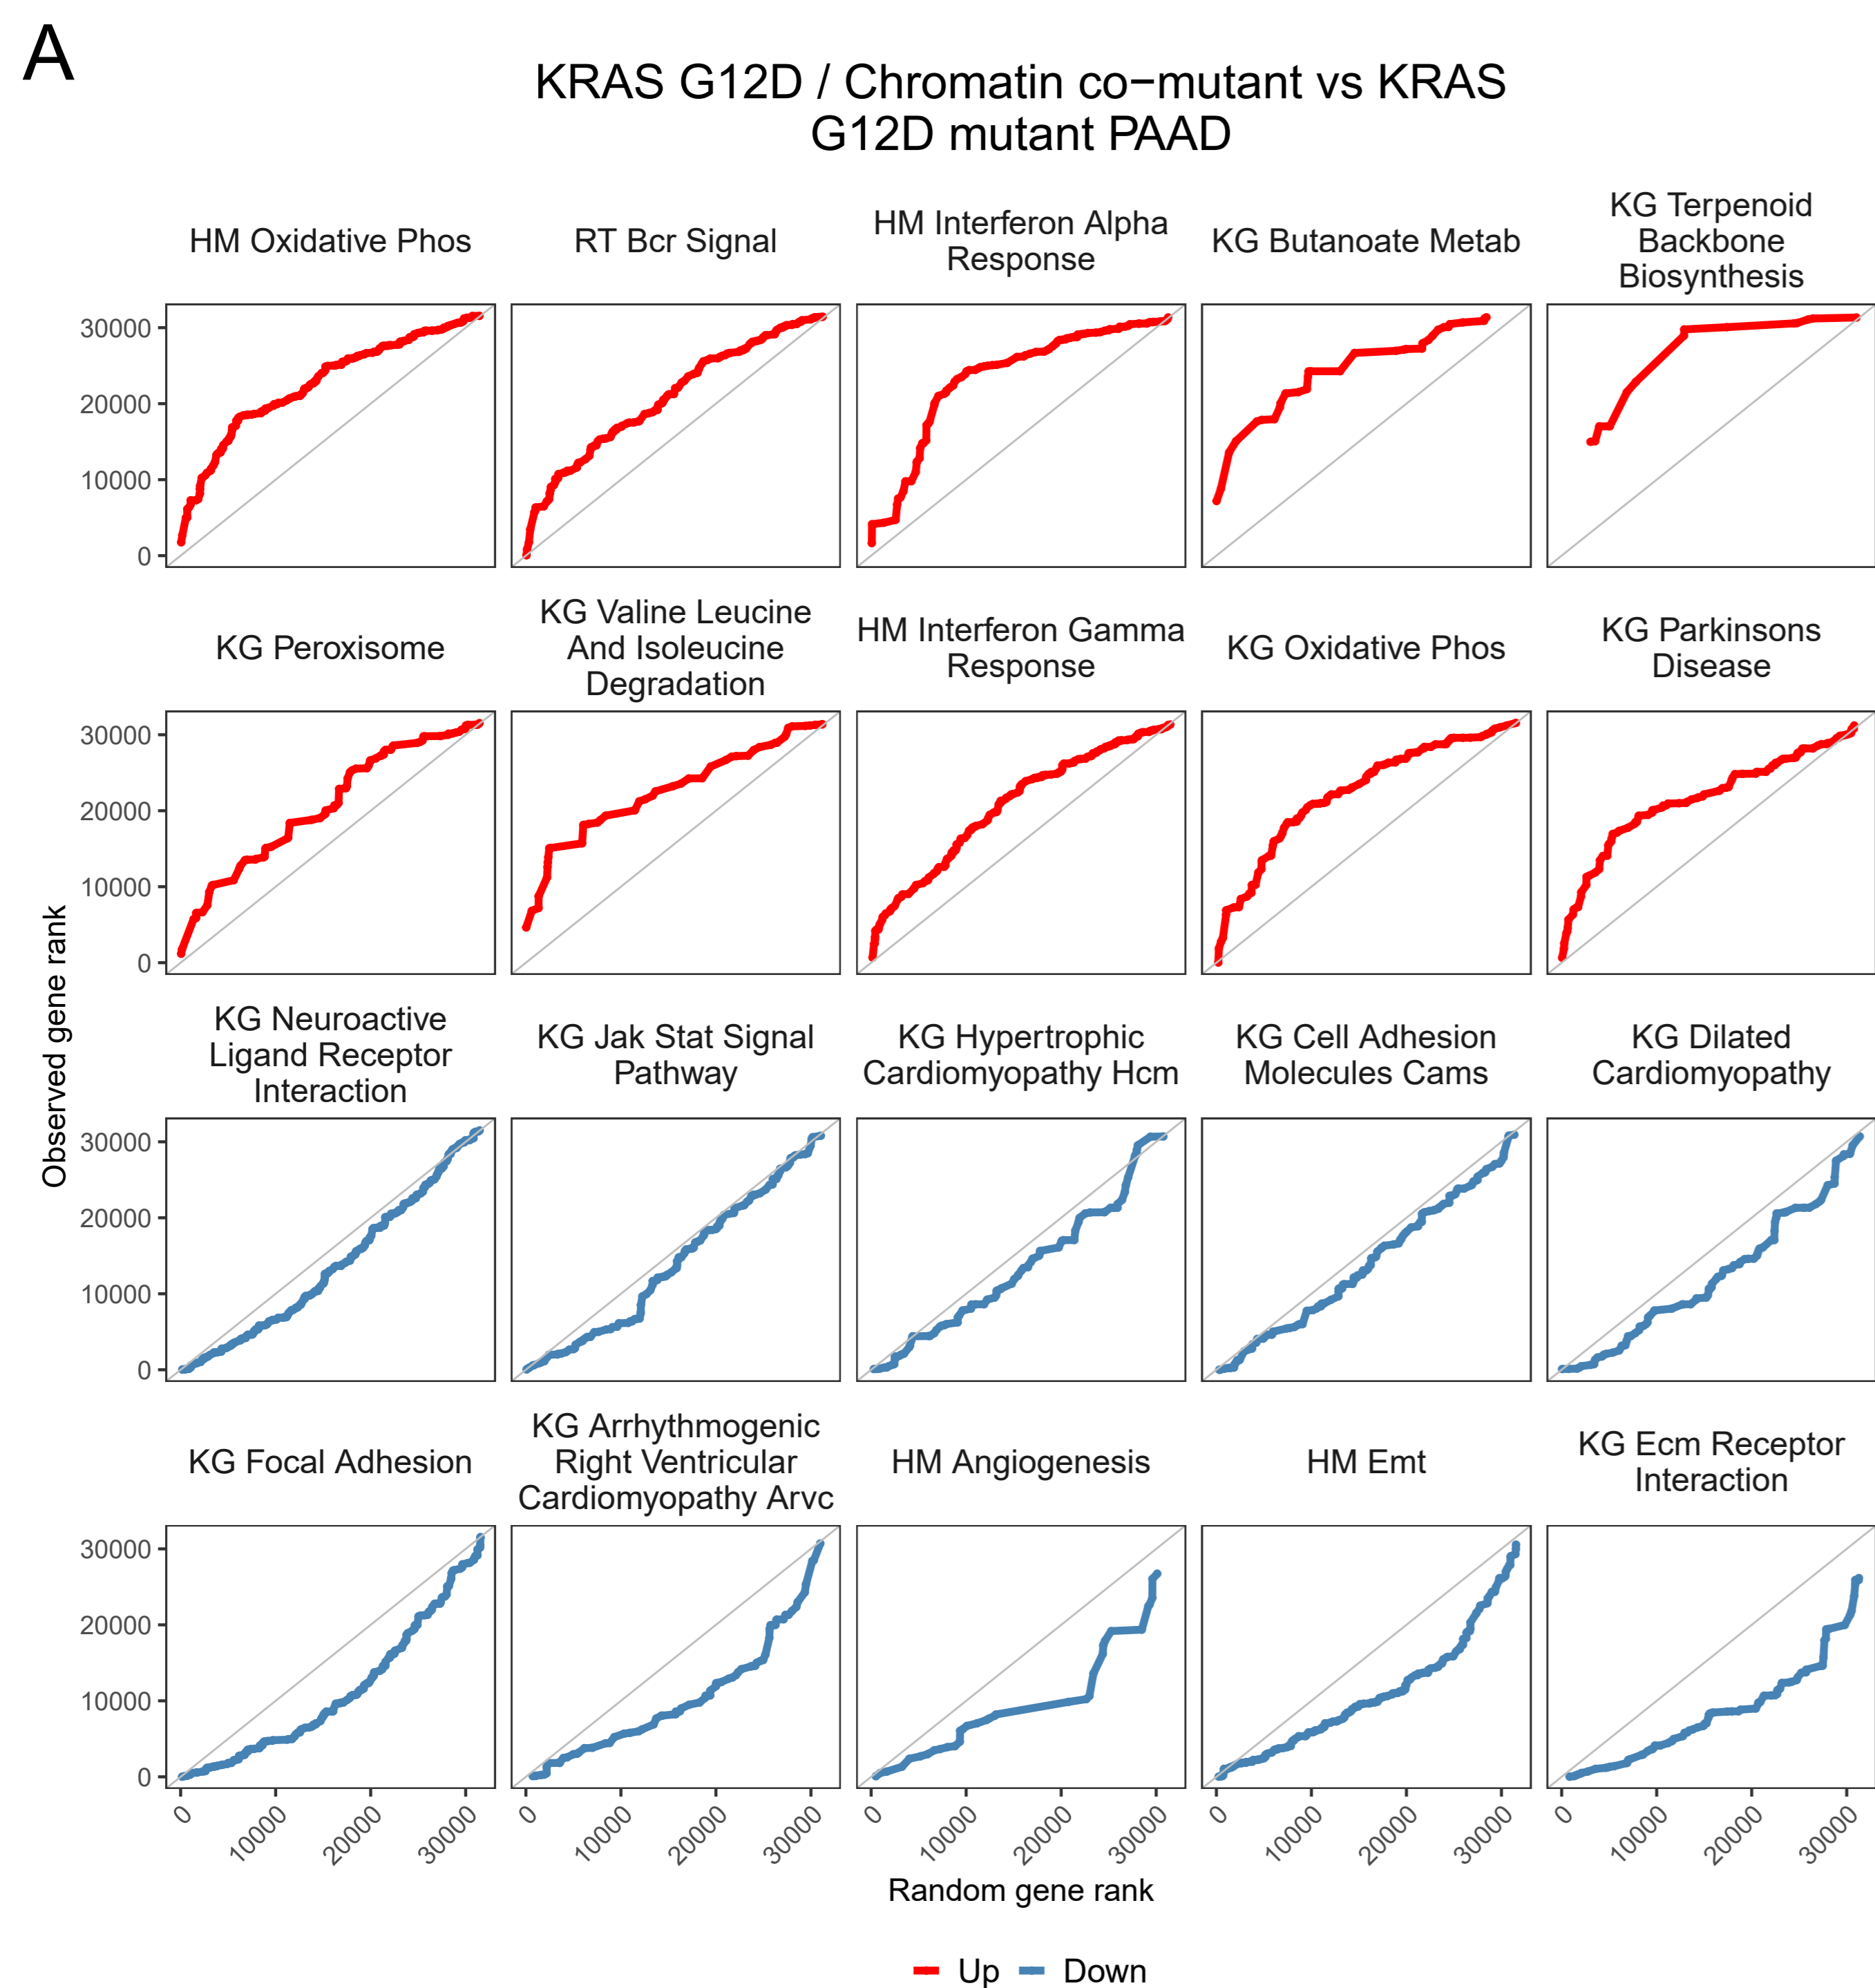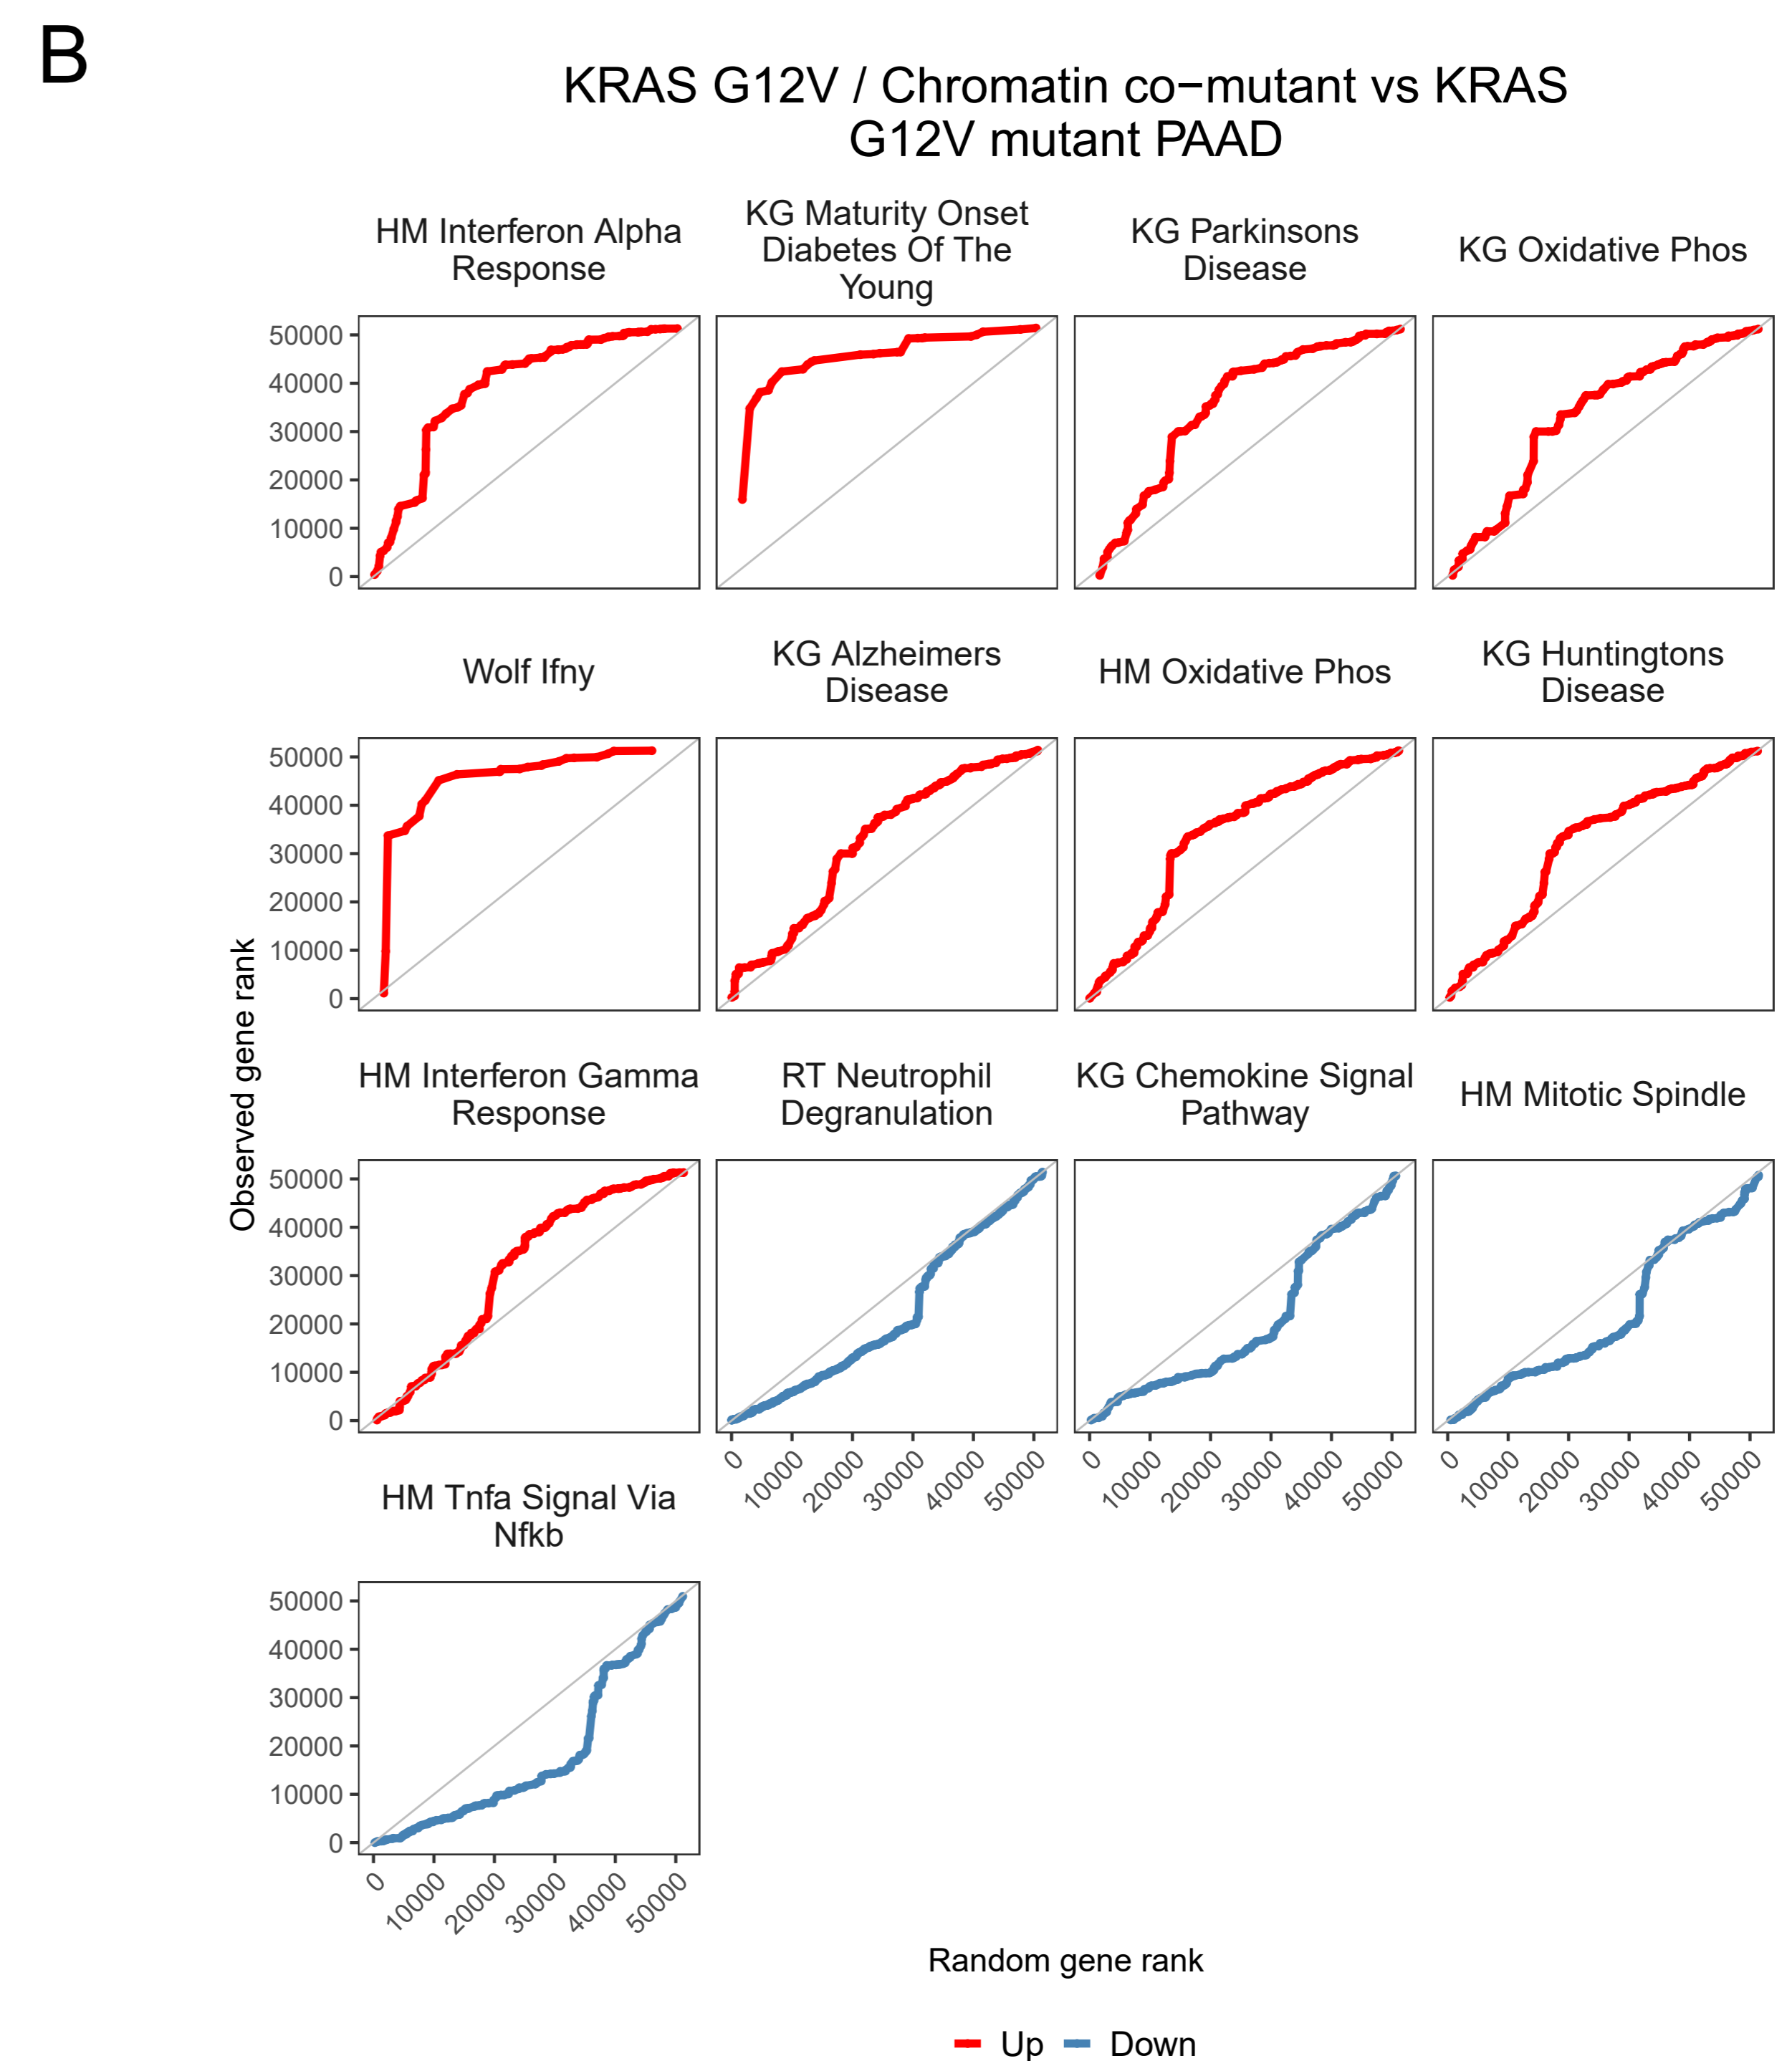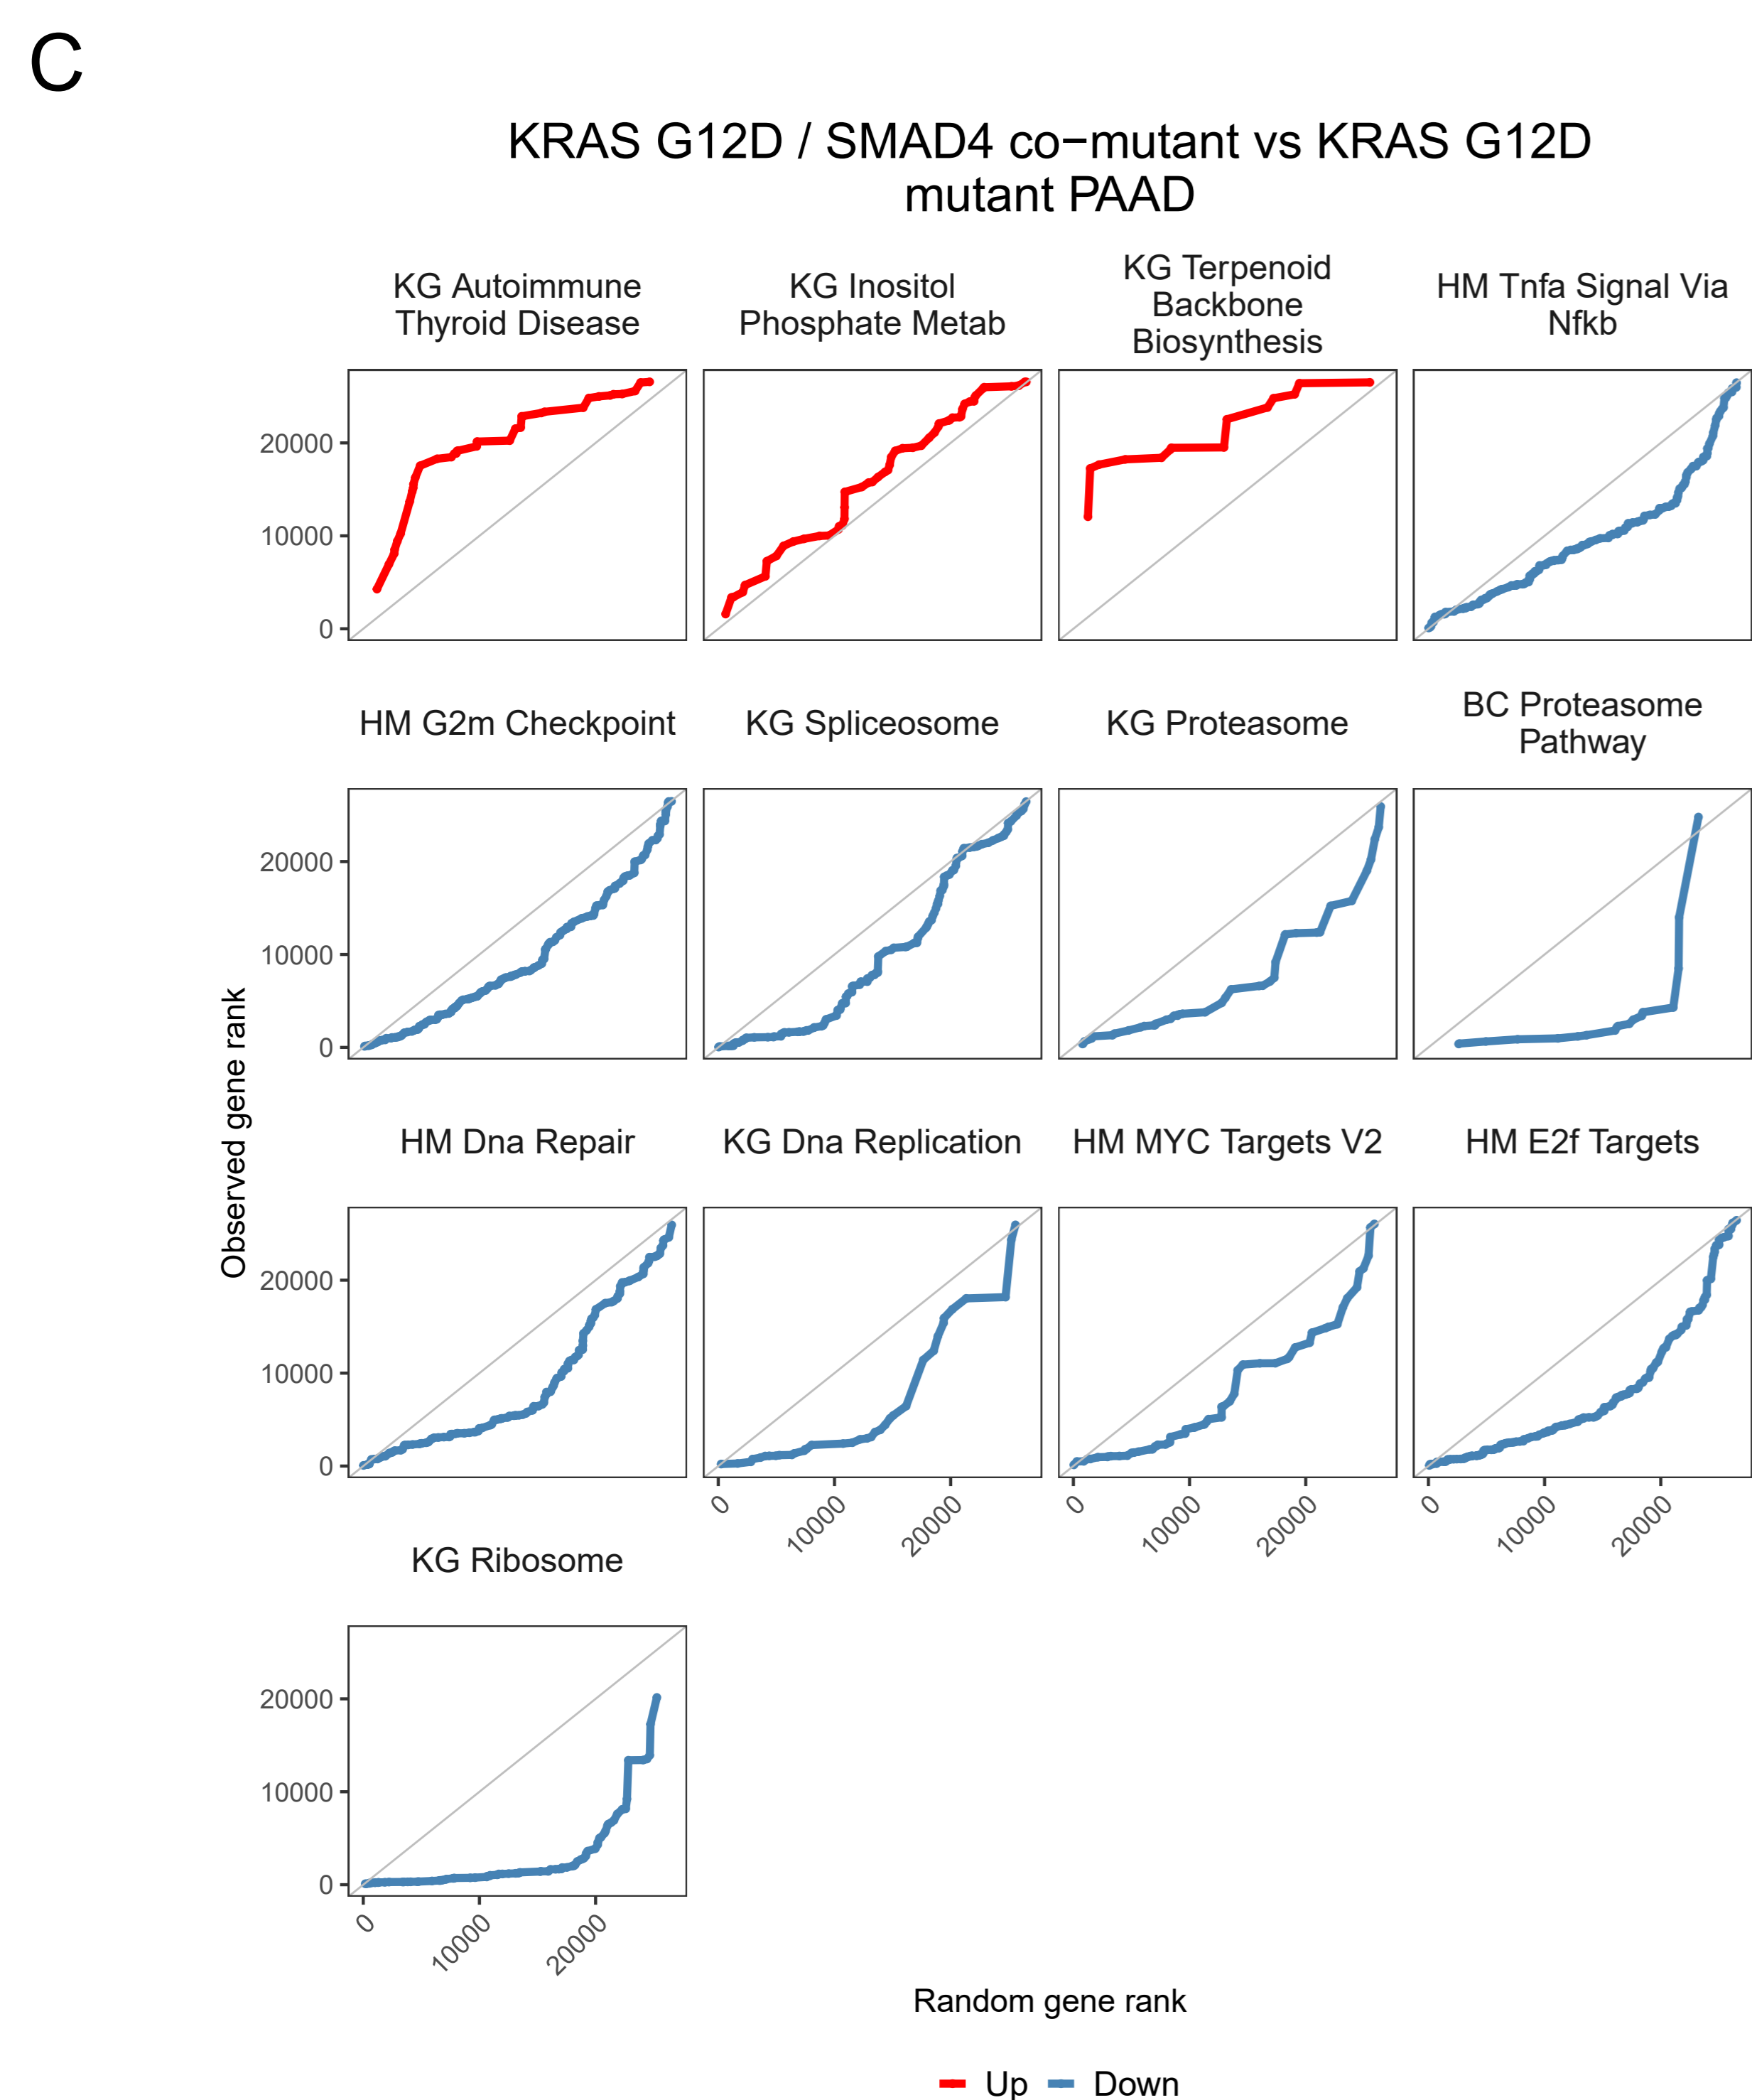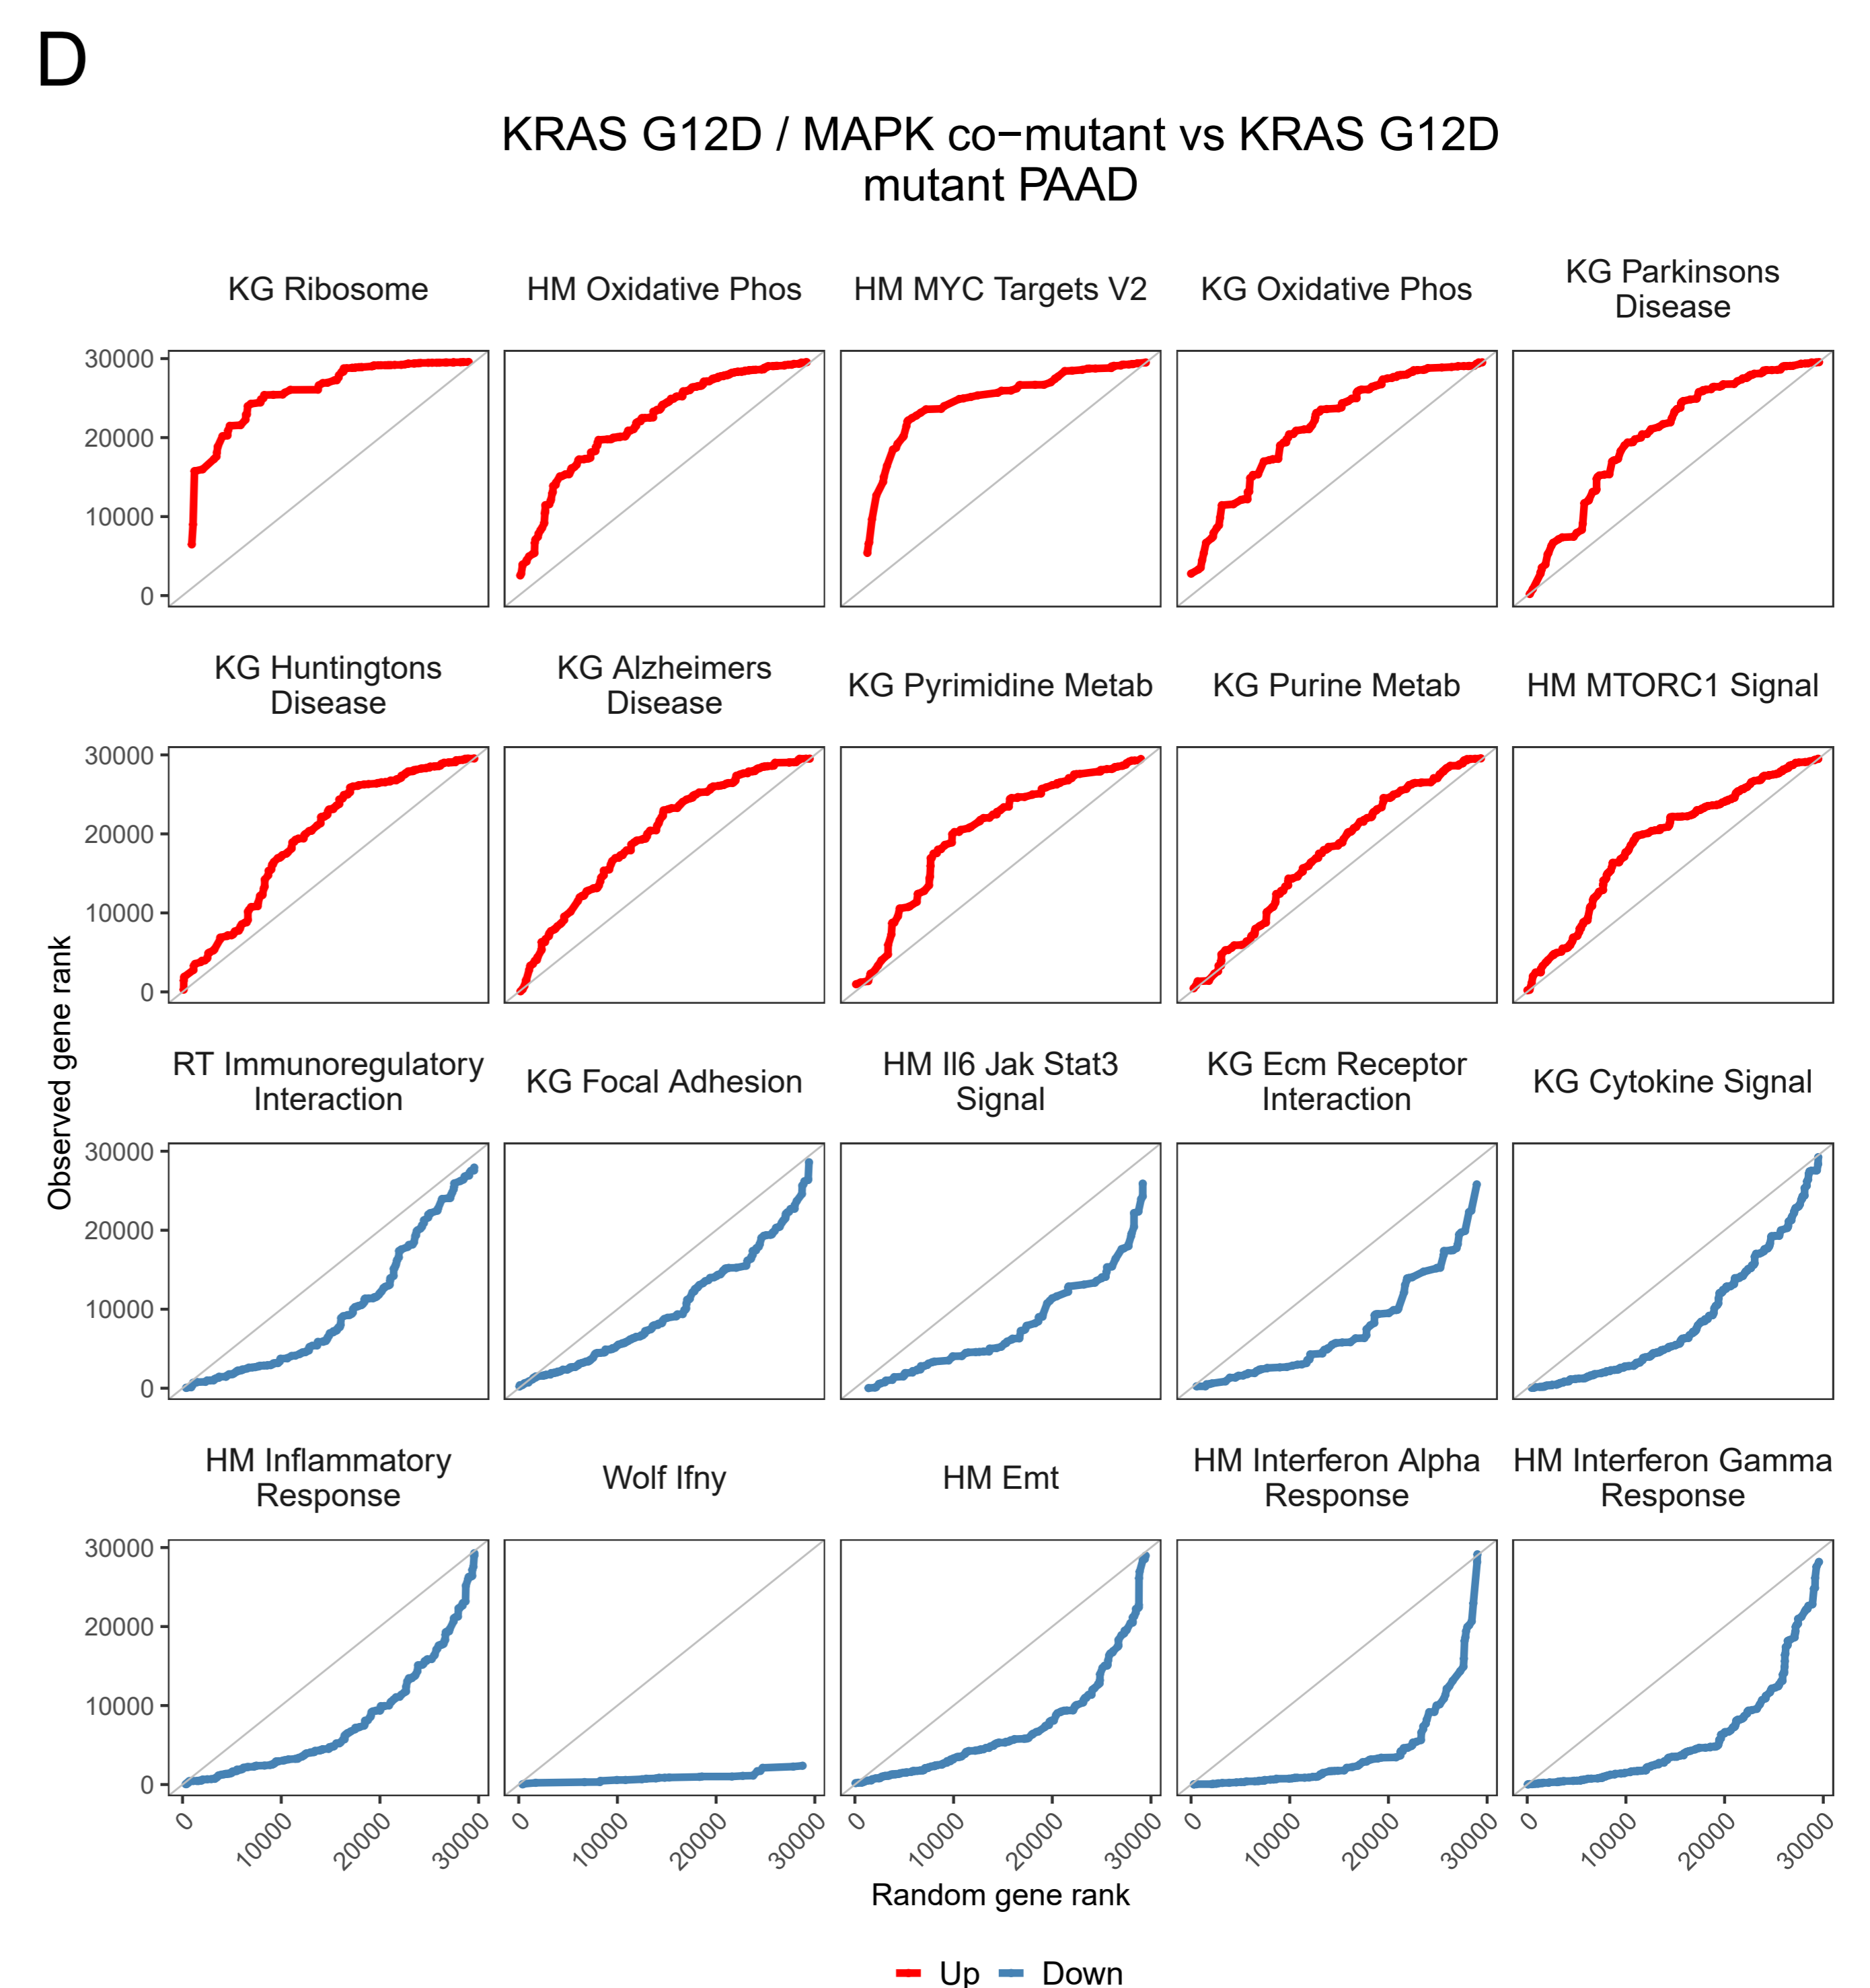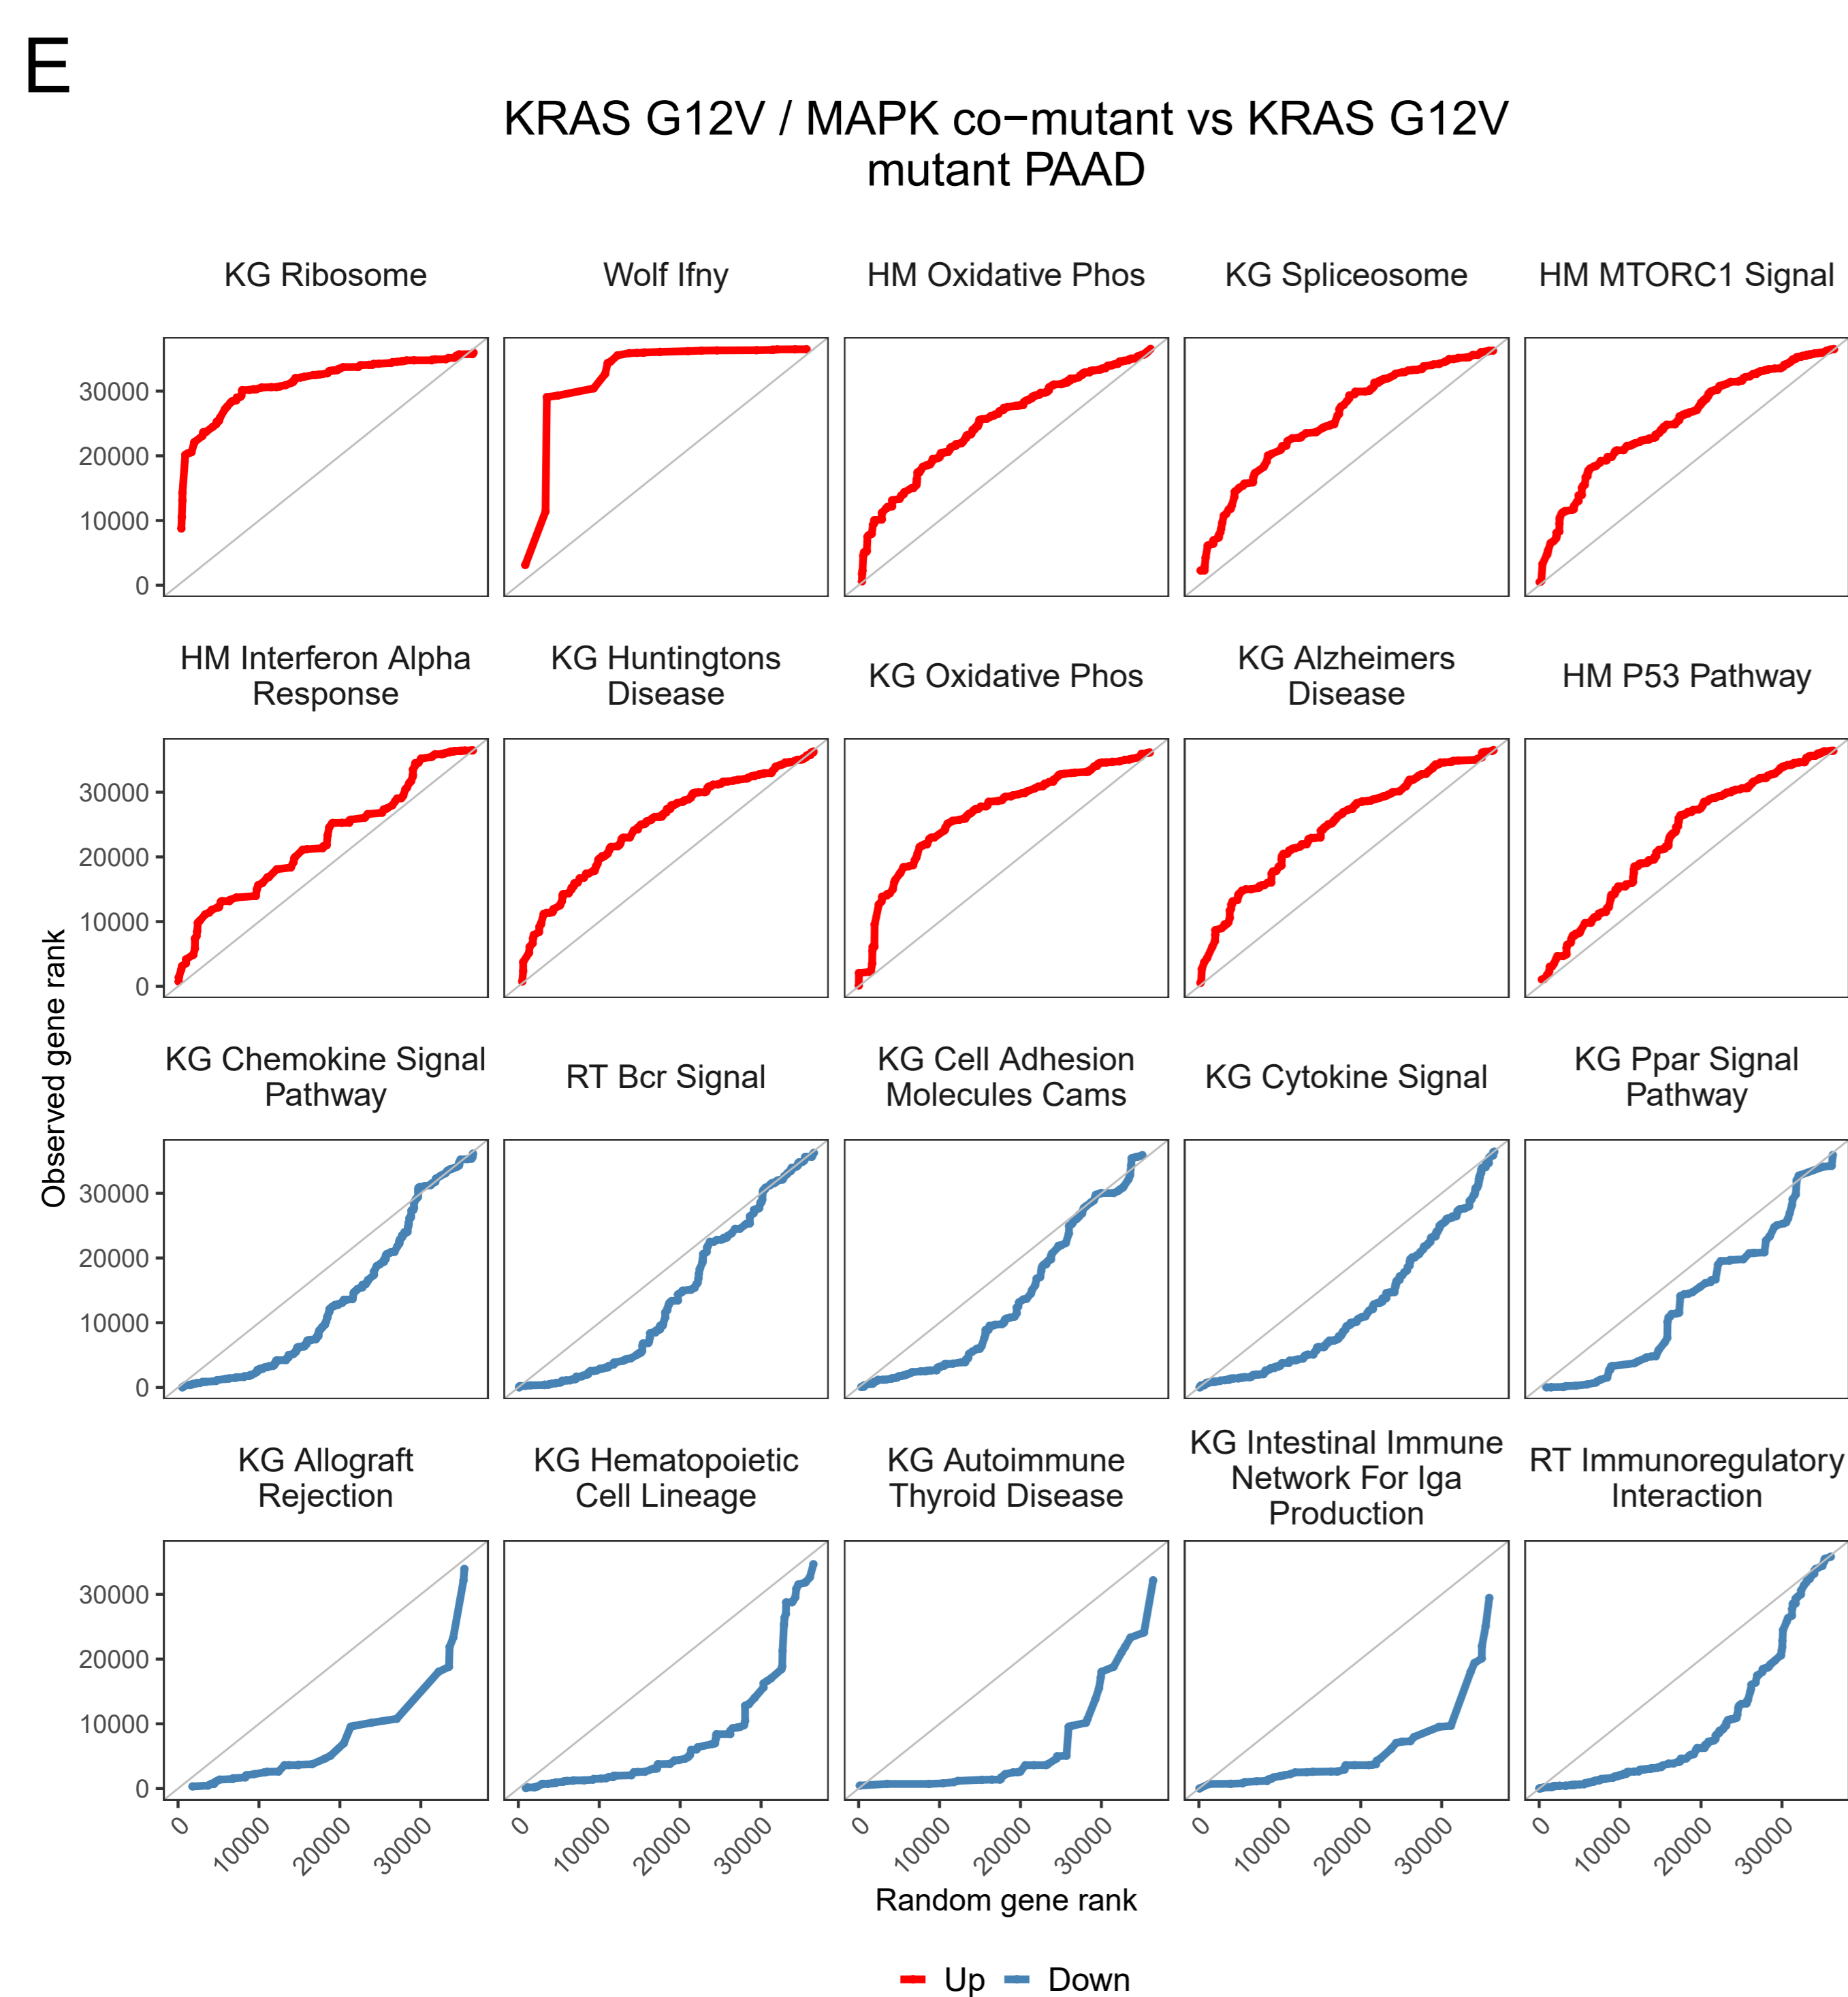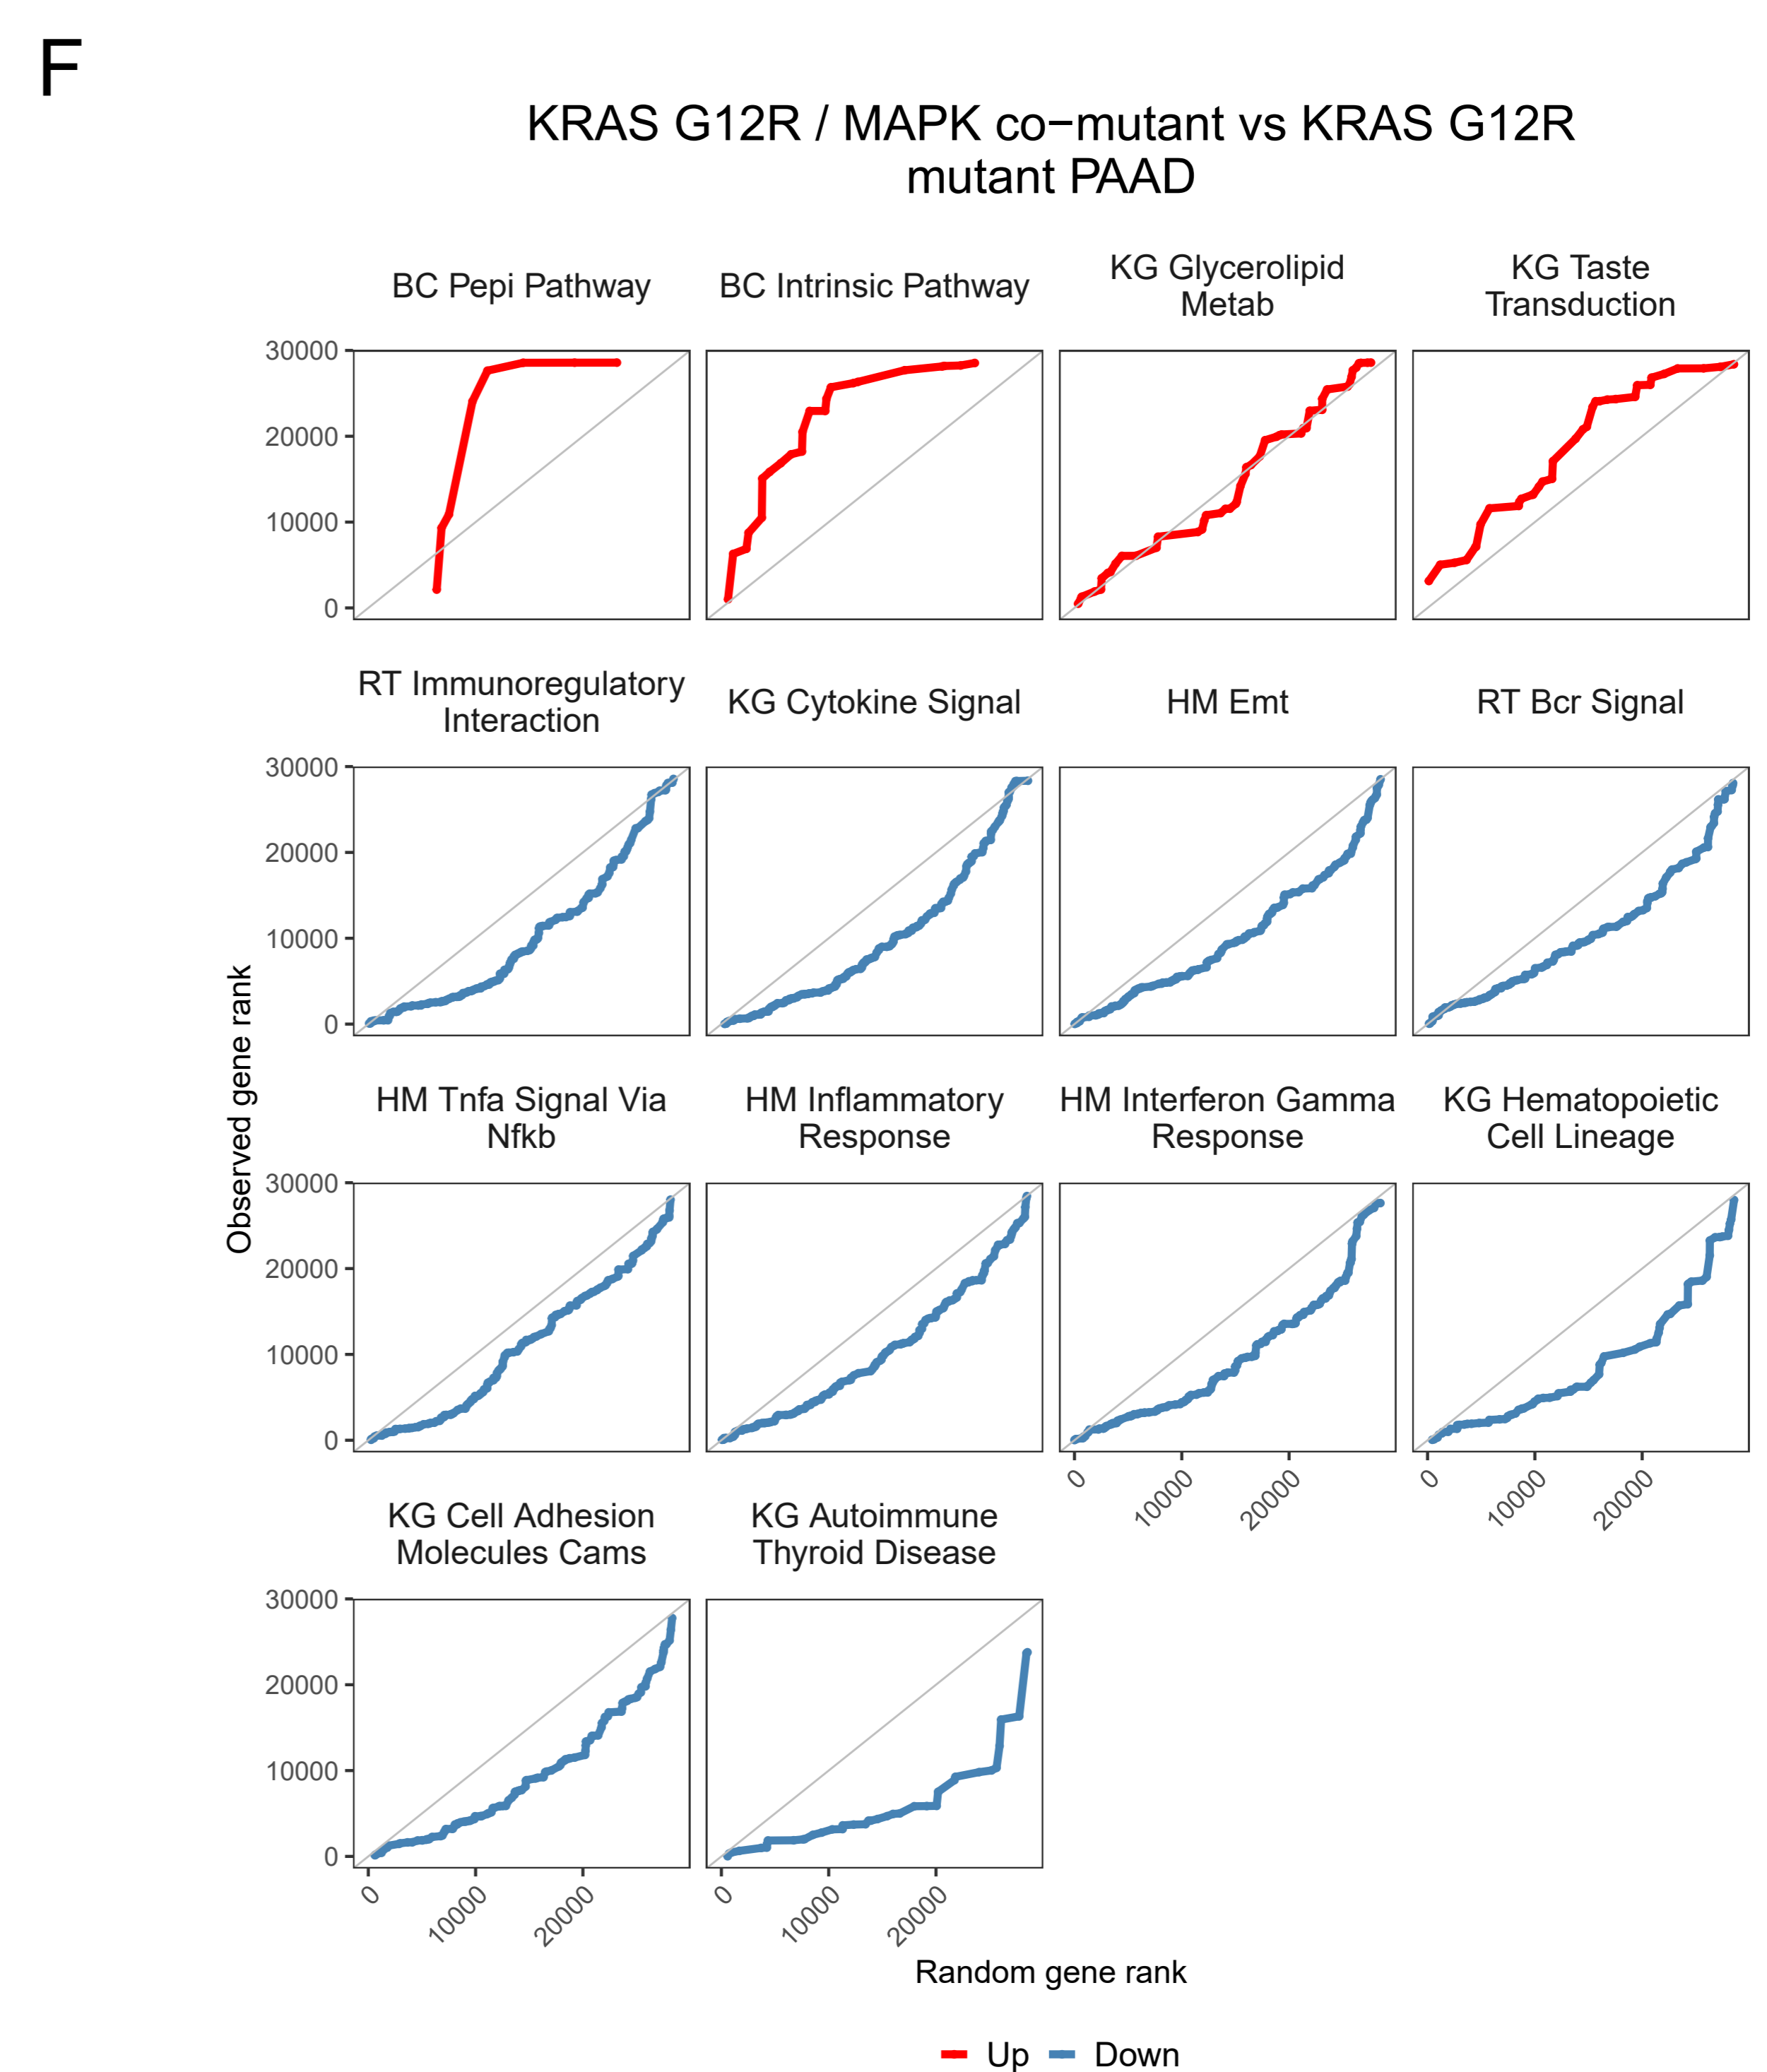

Supplement: can-22-1731_supplementary_fig.s21_supp21.pdf [file can-22-1731_supplementary_fig.s21_supp21.pdf]

# Supplementary Figure S24

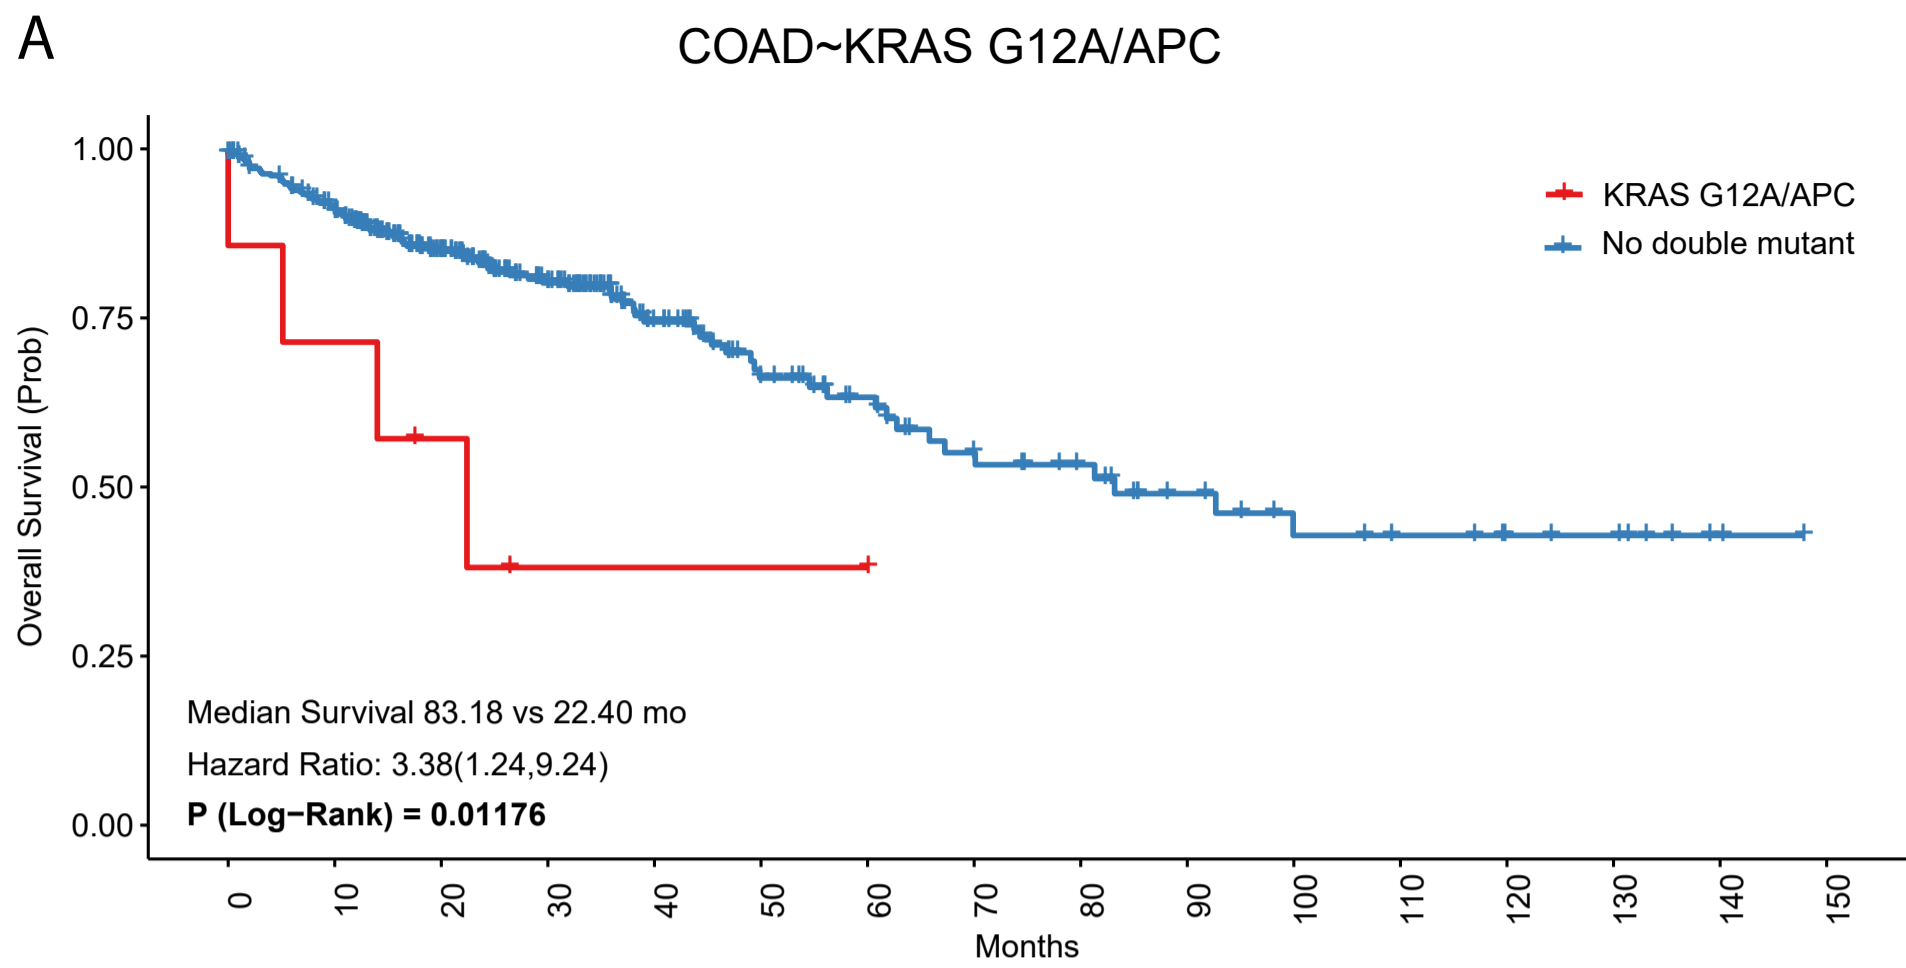

Number at risk

|     |     |     |     |    |    |    |    |    |    |    |    |   |   |   |   |
|-----|-----|-----|-----|----|----|----|----|----|----|----|----|---|---|---|---|
| 398 | 329 | 217 | 144 | 75 | 53 | 41 | 31 | 26 | 18 | 13 | 11 | 8 | 7 | 2 | 0 |
| 7   | 5   | 3   | 1   | 1  | 1  | 1  | 0  | 0  | 0  | 0  | 0  | 0 | 0 | 0 | 0 |

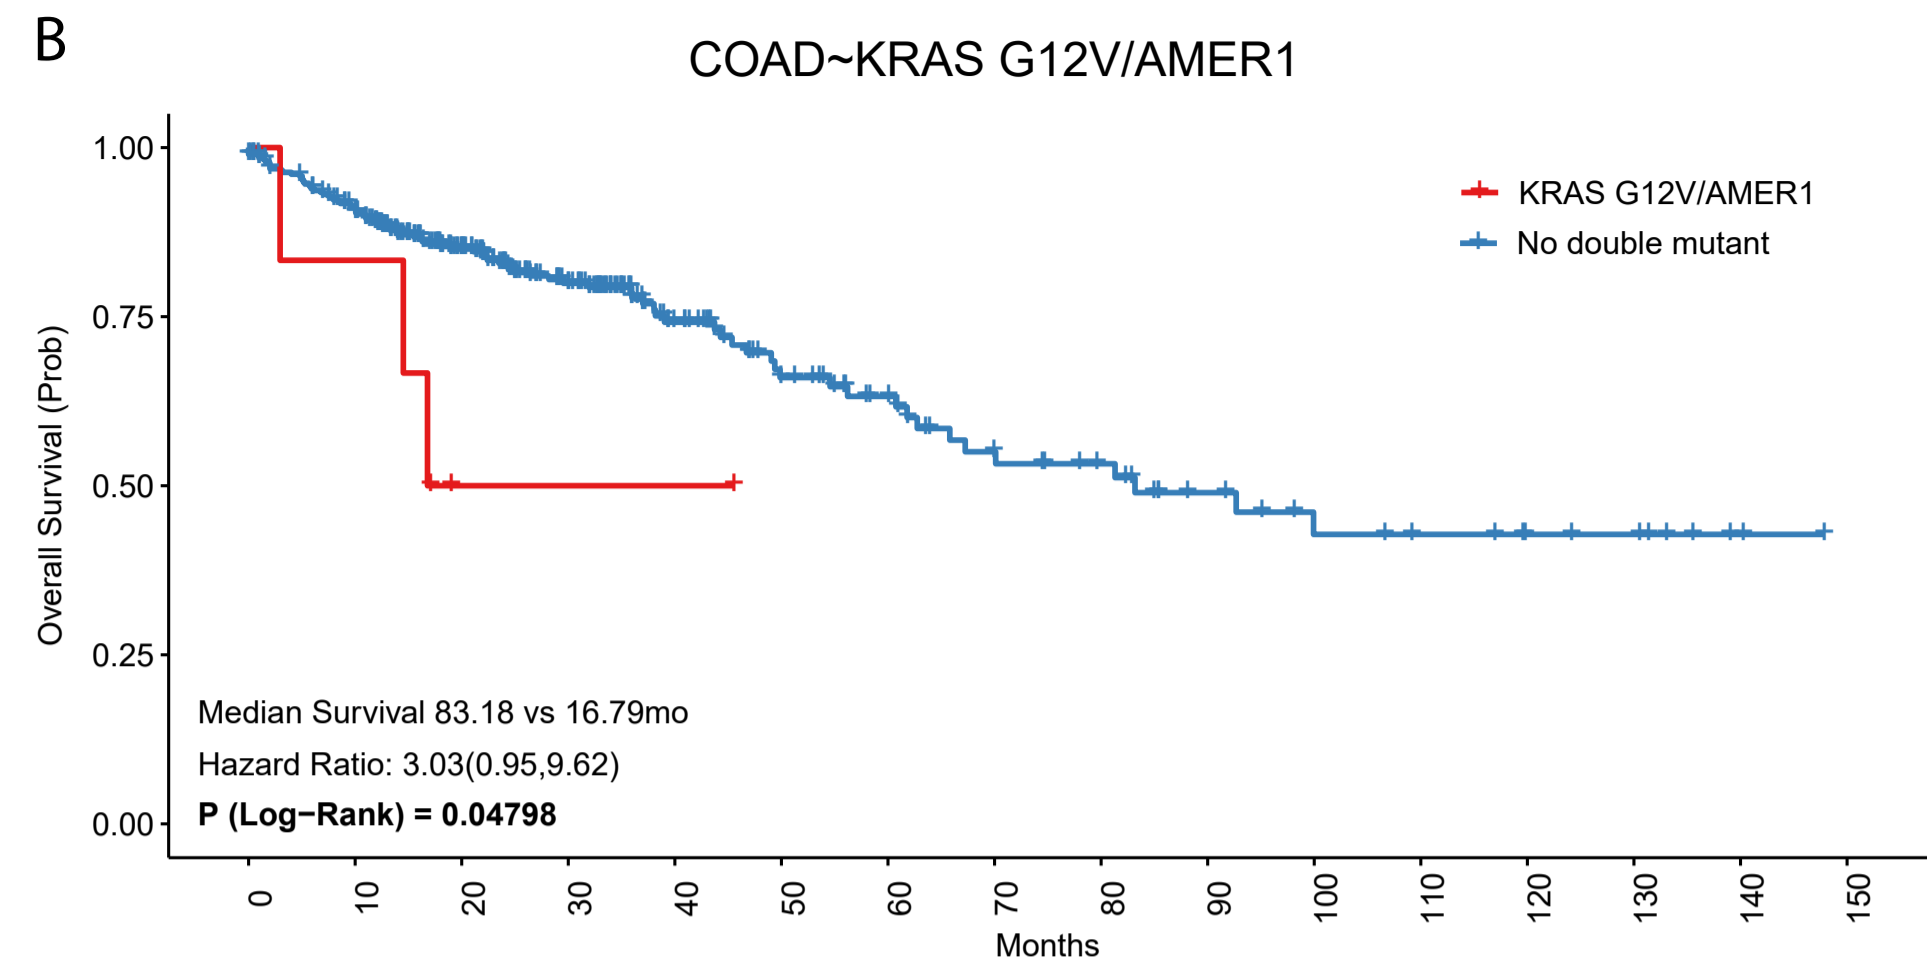

Number at risk

|     |     |     |     |    |    |    |    |    |    |    |    |   |   |   |   |
|-----|-----|-----|-----|----|----|----|----|----|----|----|----|---|---|---|---|
| 399 | 329 | 219 | 144 | 75 | 54 | 42 | 31 | 26 | 18 | 13 | 11 | 8 | 7 | 2 | 0 |
| 6   | 5   | 1   | 1   | 1  | 0  | 0  | 0  | 0  | 0  | 0  | 0  | 0 | 0 | 0 | 0 |

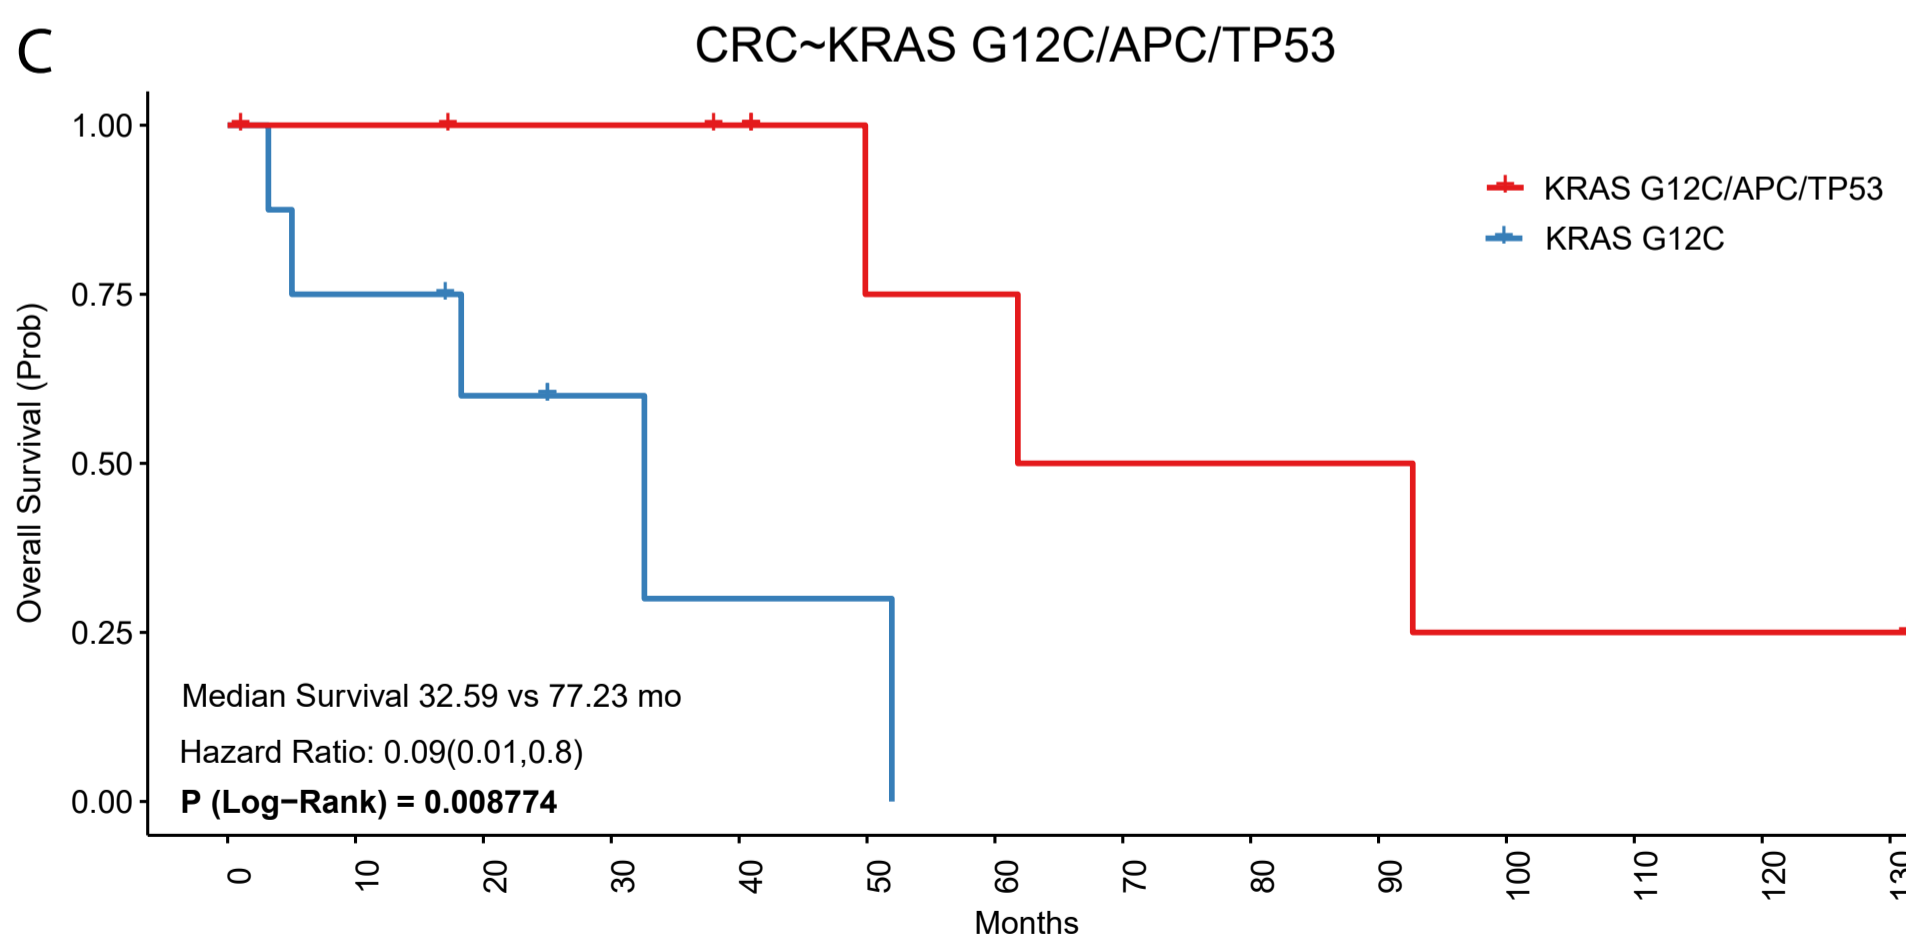

Number at risk

|   |   |   |   |   |   |   |   |   |   |   |   |   |   |   |   |
|---|---|---|---|---|---|---|---|---|---|---|---|---|---|---|---|
| 8 | 6 | 4 | 2 | 1 | 1 | 0 | 0 | 0 | 0 | 0 | 0 | 0 | 0 | 0 | 0 |
| 9 | 8 | 7 | 7 | 6 | 3 | 3 | 2 | 2 | 2 | 1 | 1 | 1 | 1 | 1 | 1 |

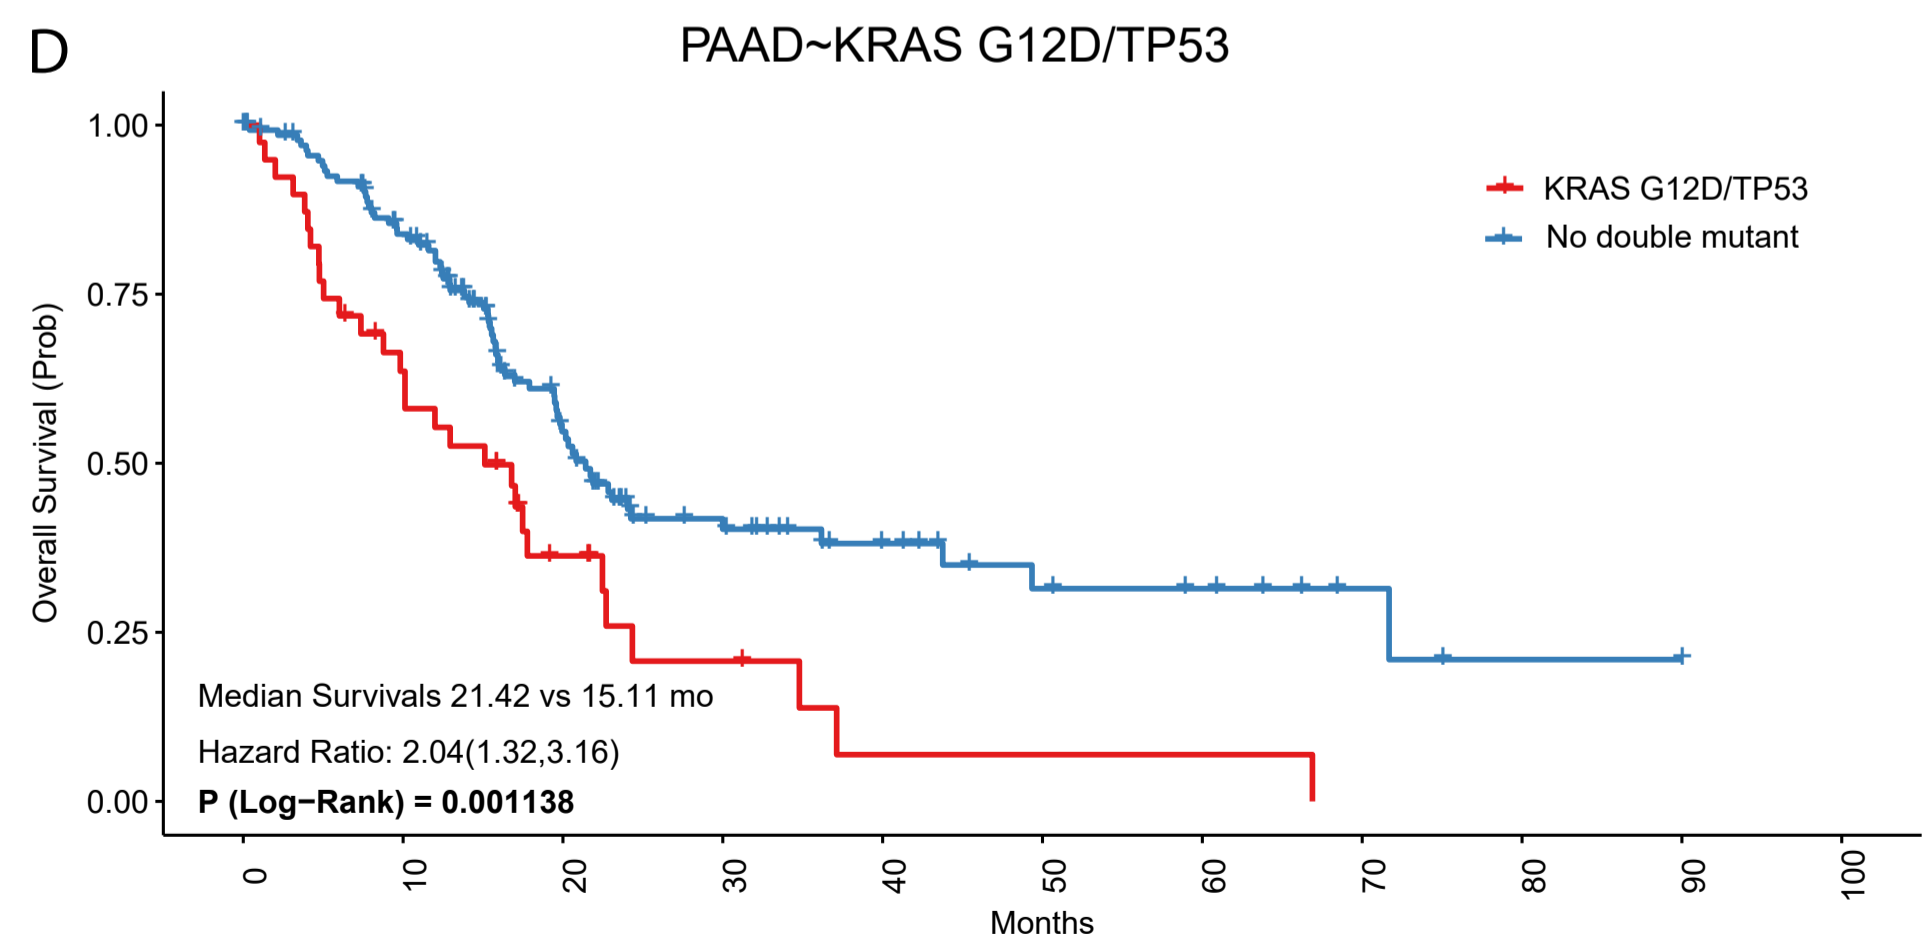

Number at risk

|     |     |    |    |    |   |   |   |   |   |   |   |   |   |
|-----|-----|----|----|----|---|---|---|---|---|---|---|---|---|
| 139 | 105 | 50 | 26 | 15 | 9 | 7 | 3 | 1 | 1 | 0 | 0 | 0 | 0 |
| 39  | 23  | 9  | 4  | 1  | 1 | 1 | 0 | 0 | 0 | 0 | 0 | 0 | 0 |

Supplement: can-22-1731_supplementary_fig.s24_supp24.pdf [file can-22-1731_supplementary_fig.s24_supp24.pdf]

# Supplementary Figure S2

A

Bayesian hierarchical model   Chi square   Fisher exact

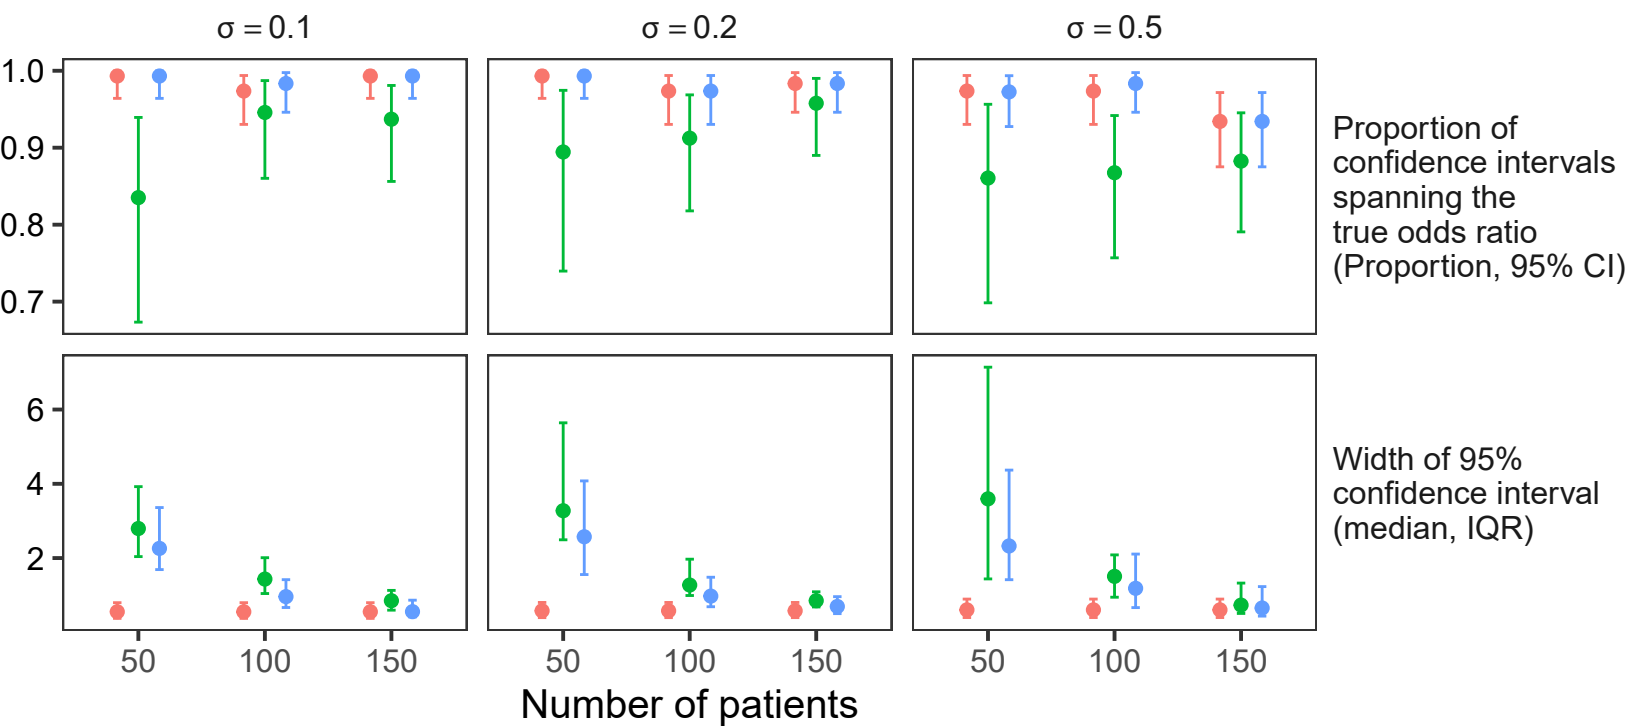

B

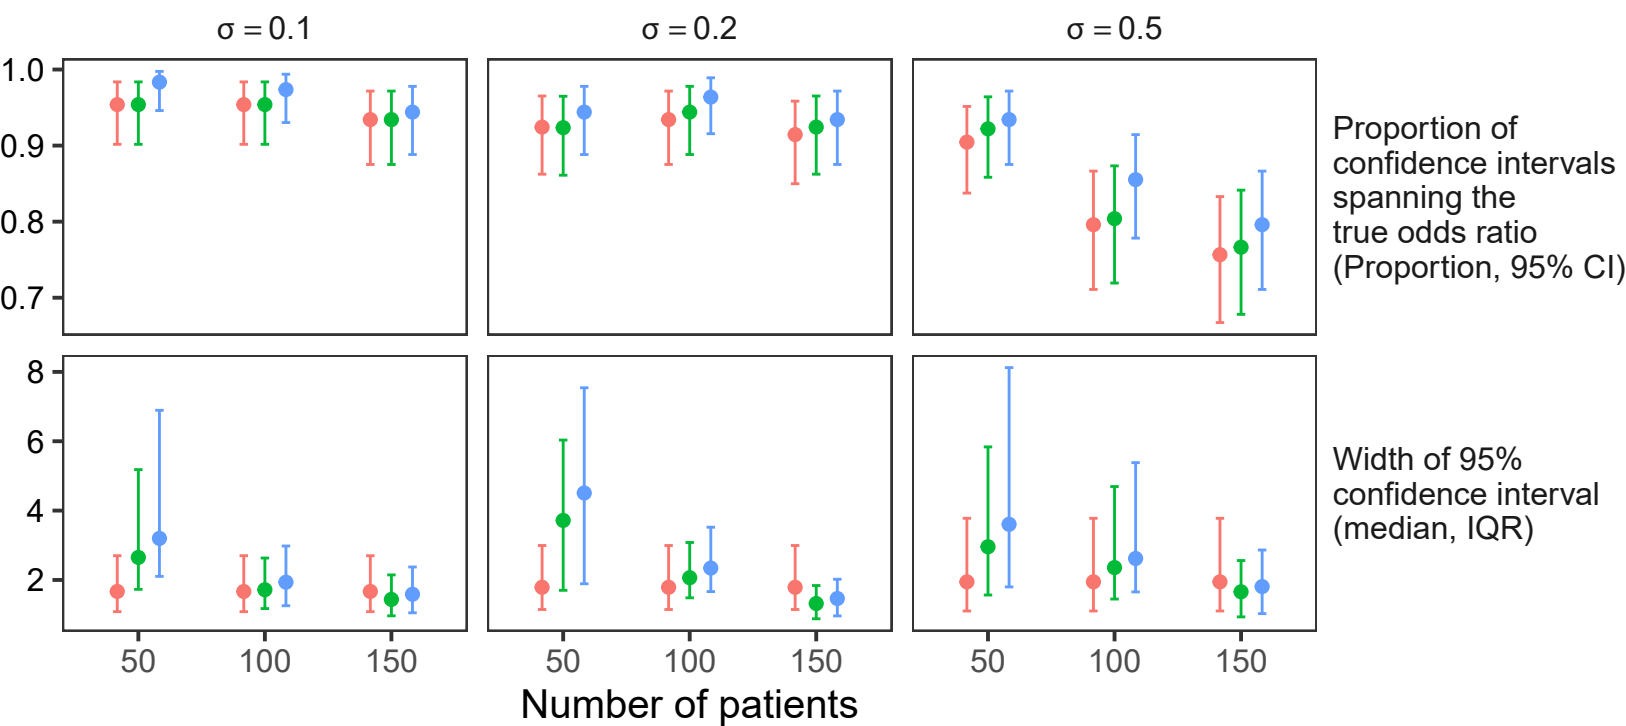

Supplement: can-22-1731_supplementary_fig.s2_supp2.pdf [file can-22-1731_supplementary_fig.s2_supp2.pdf]

Supplementary Figure S4

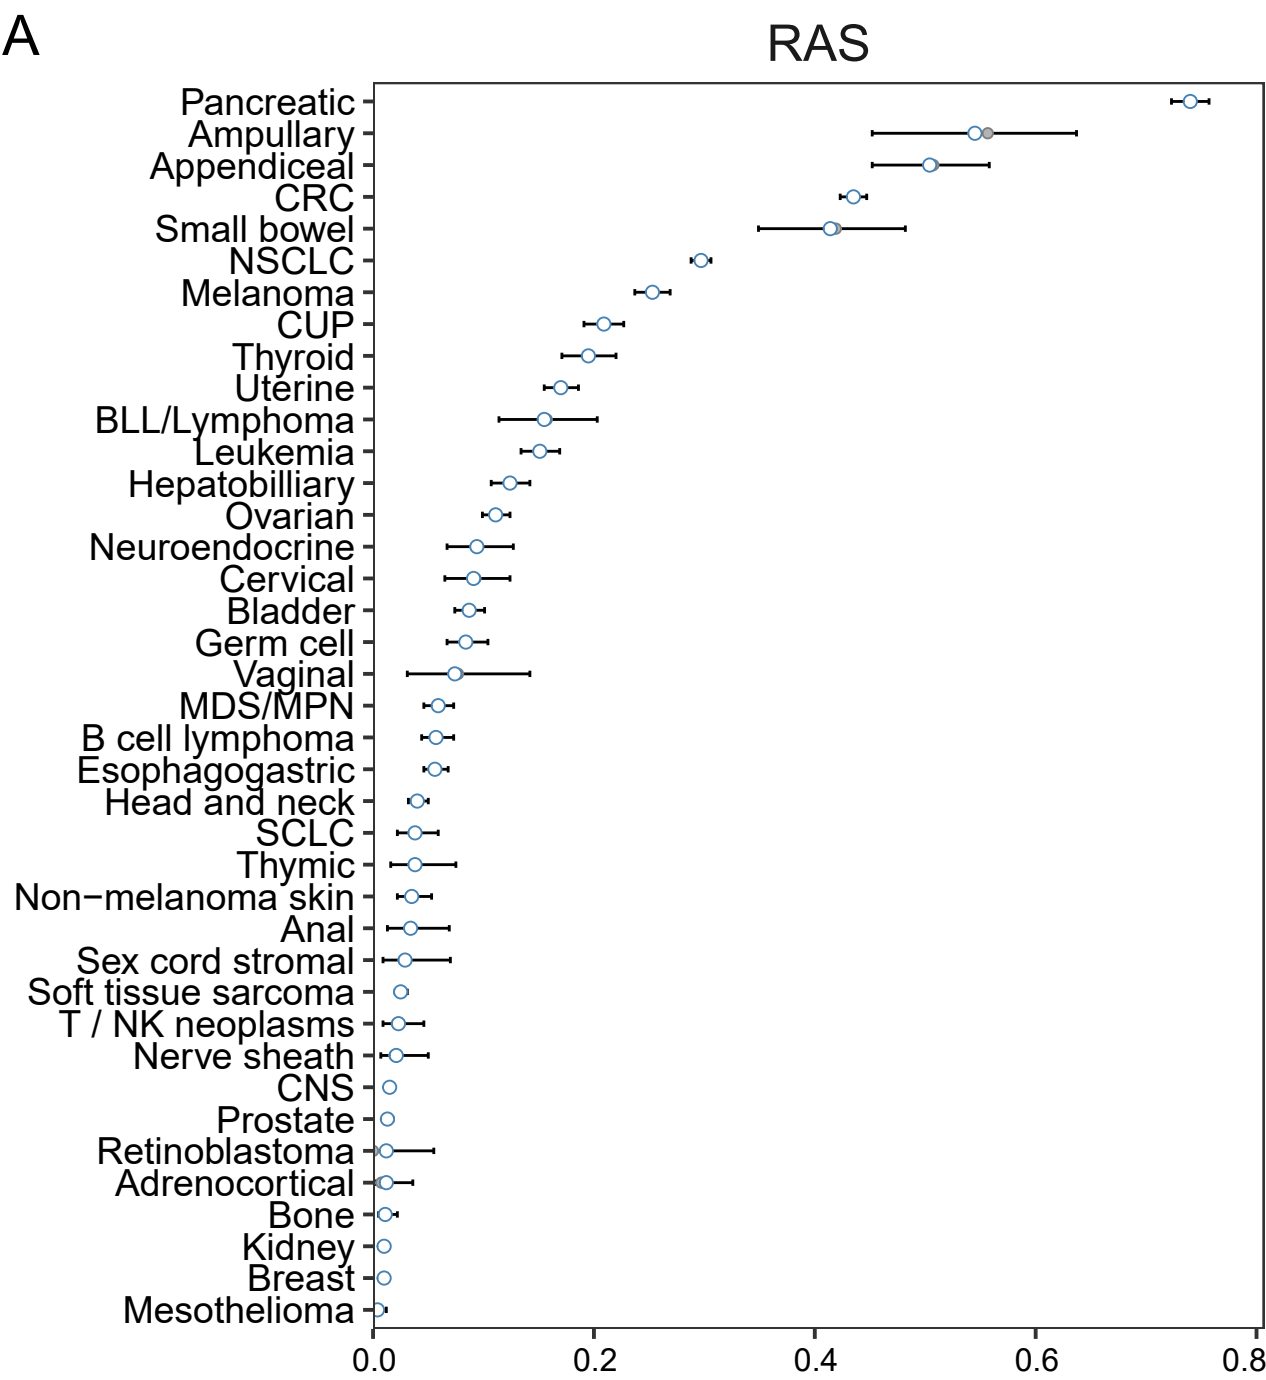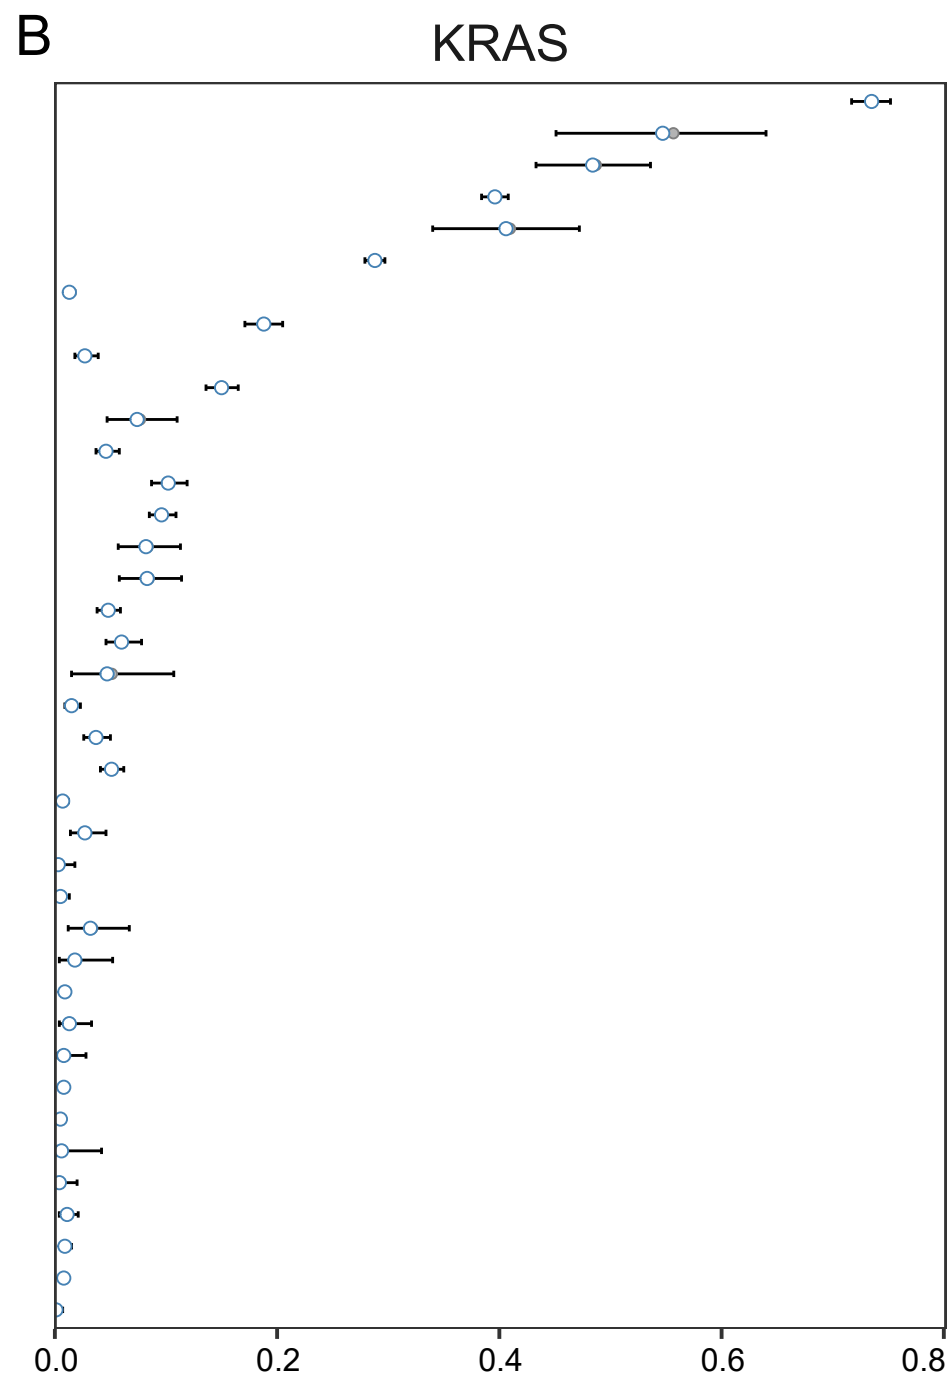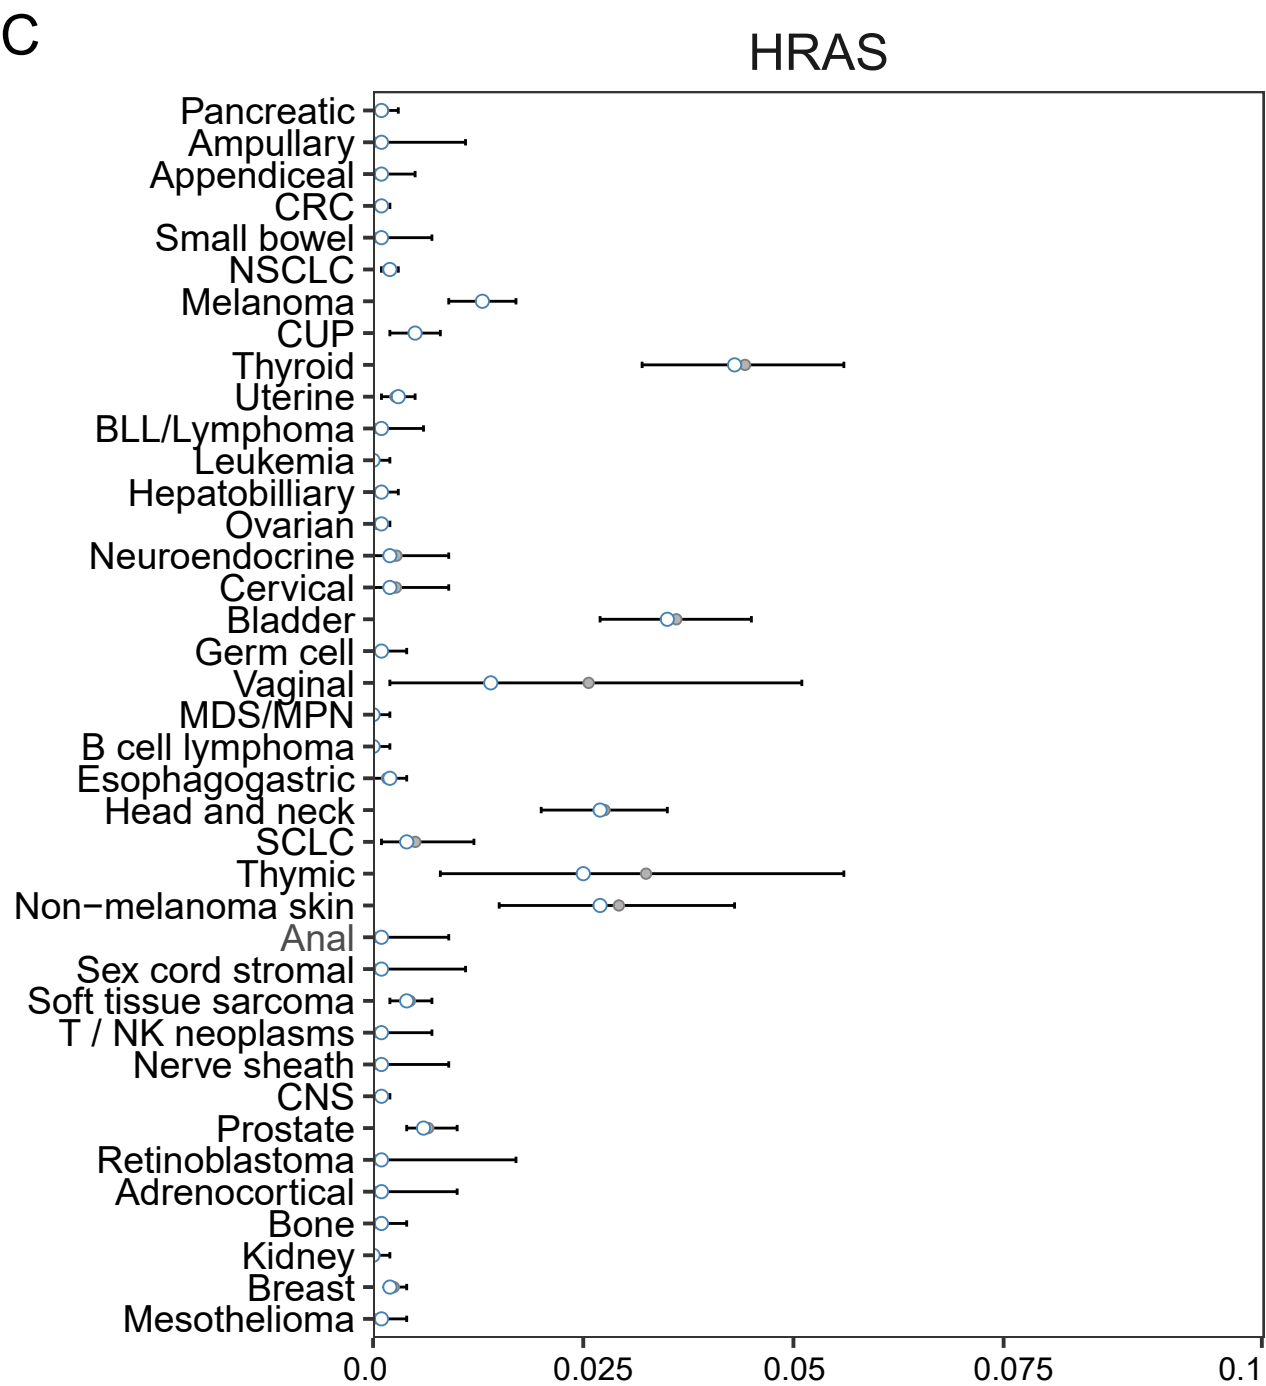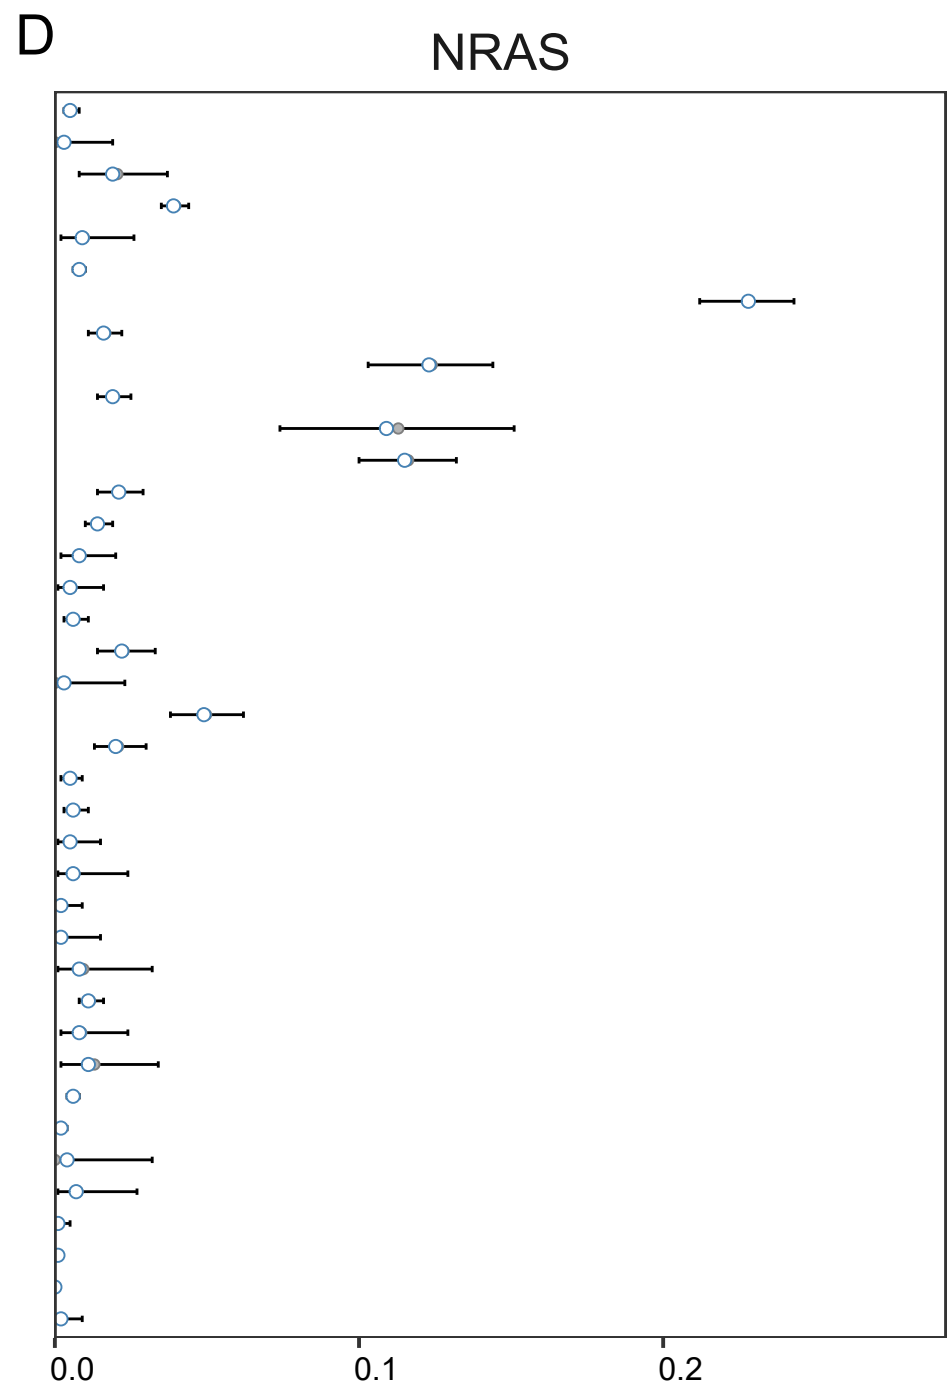

Prevalence

Supplement: can-22-1731_supplementary_fig.s4_supp4.pdf [file can-22-1731_supplementary_fig.s4_supp4.pdf]

A

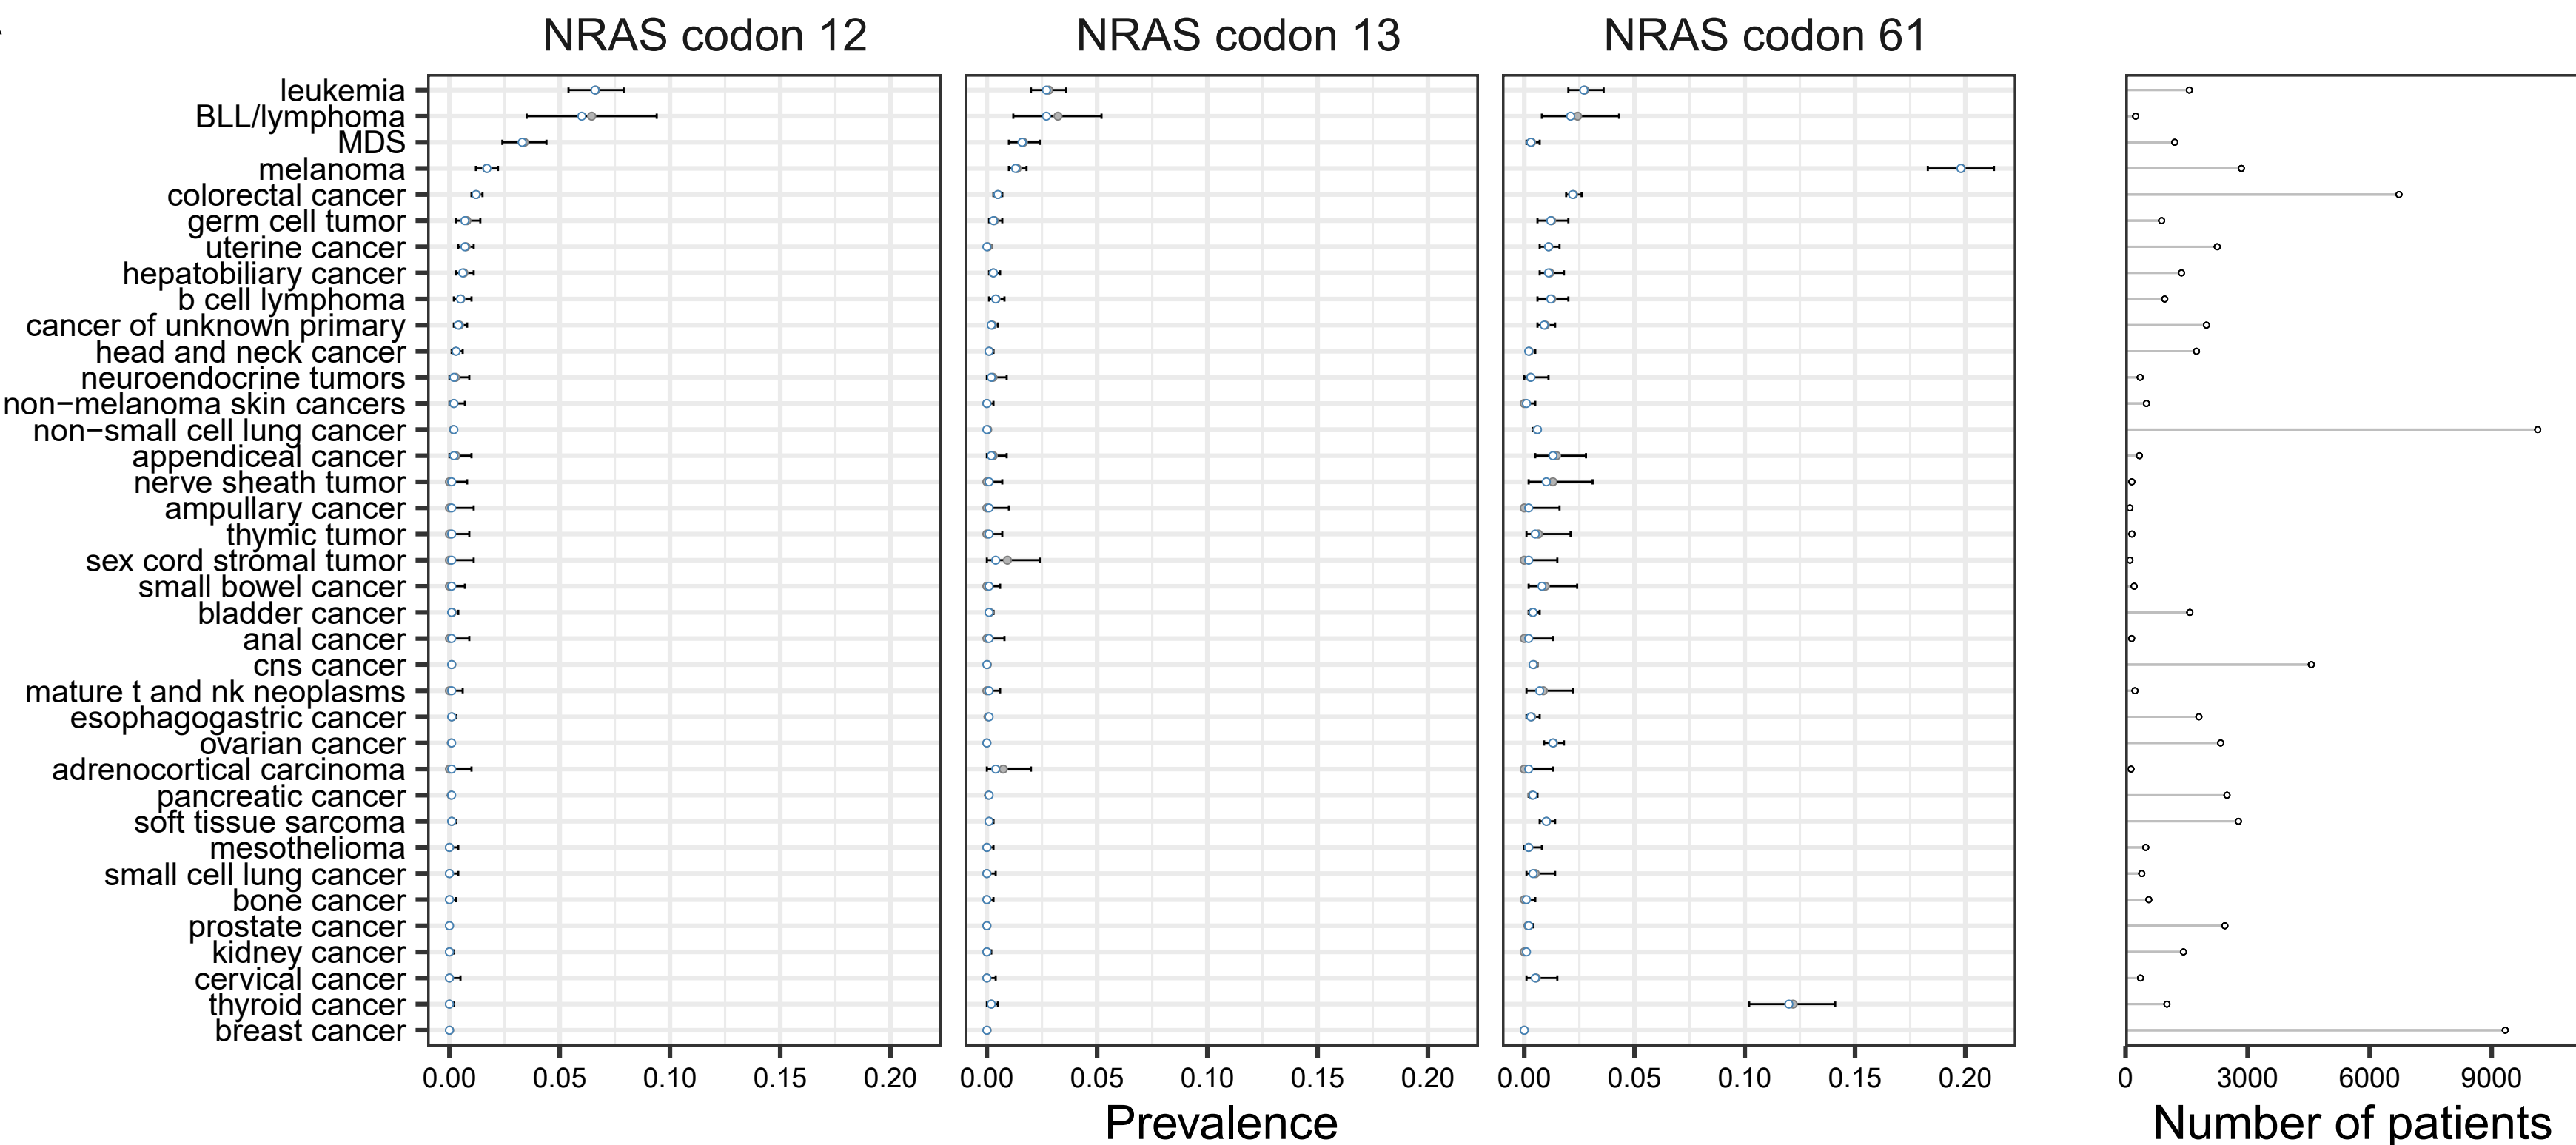

B

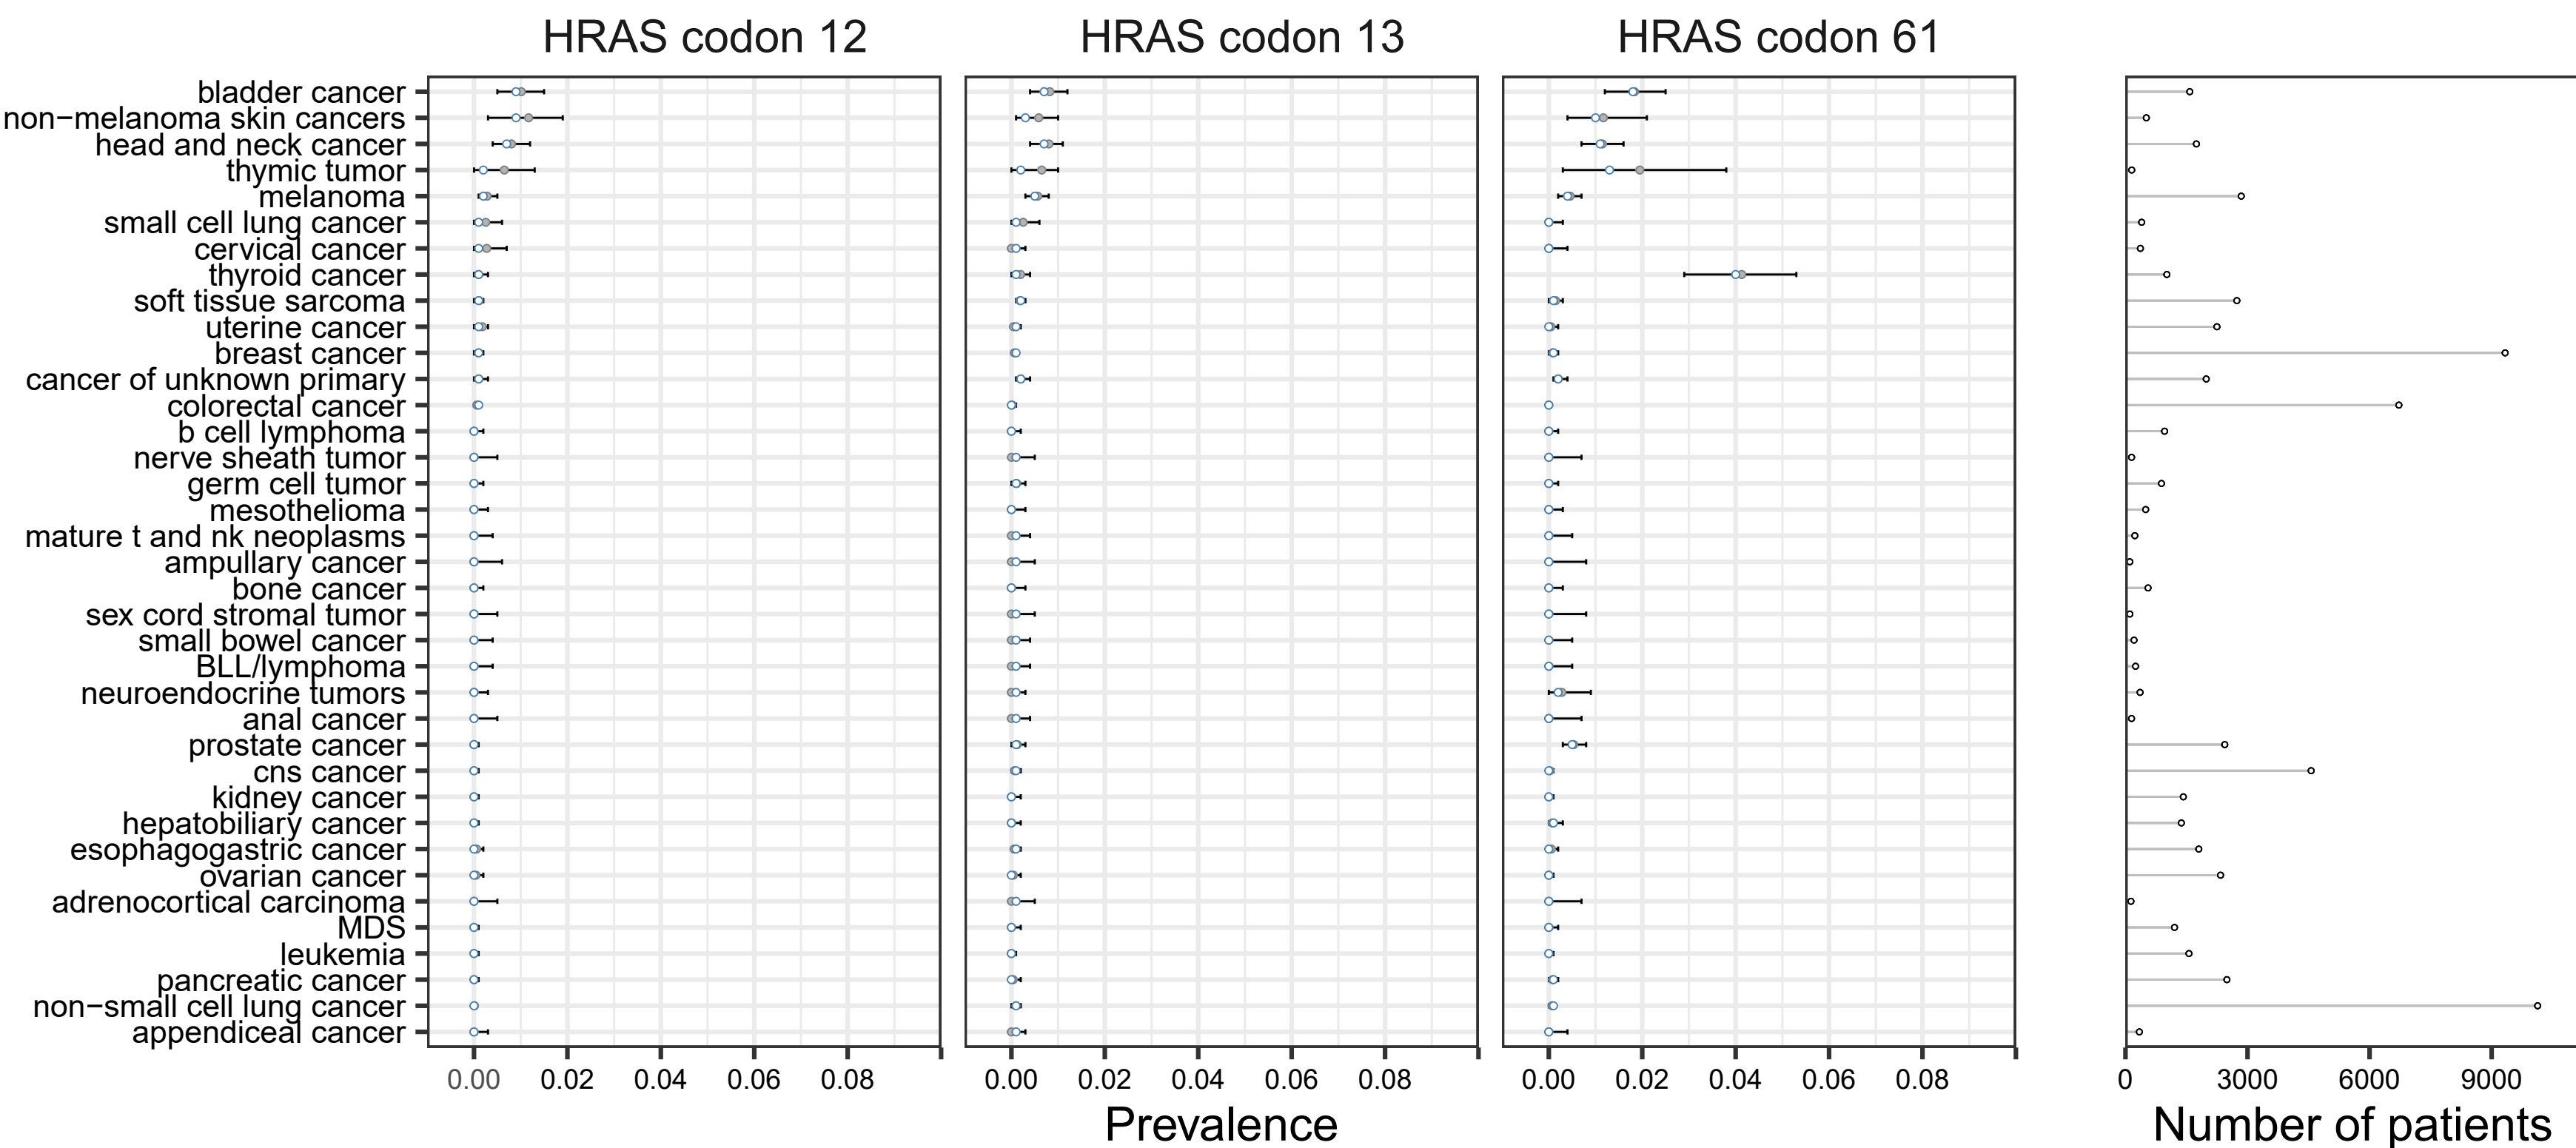

Supplement: can-22-1731_supplementary_fig.s5_supp5.pdf [file can-22-1731_supplementary_fig.s5_supp5.pdf]

# Supplementary Figure S6

## NRAS 61R

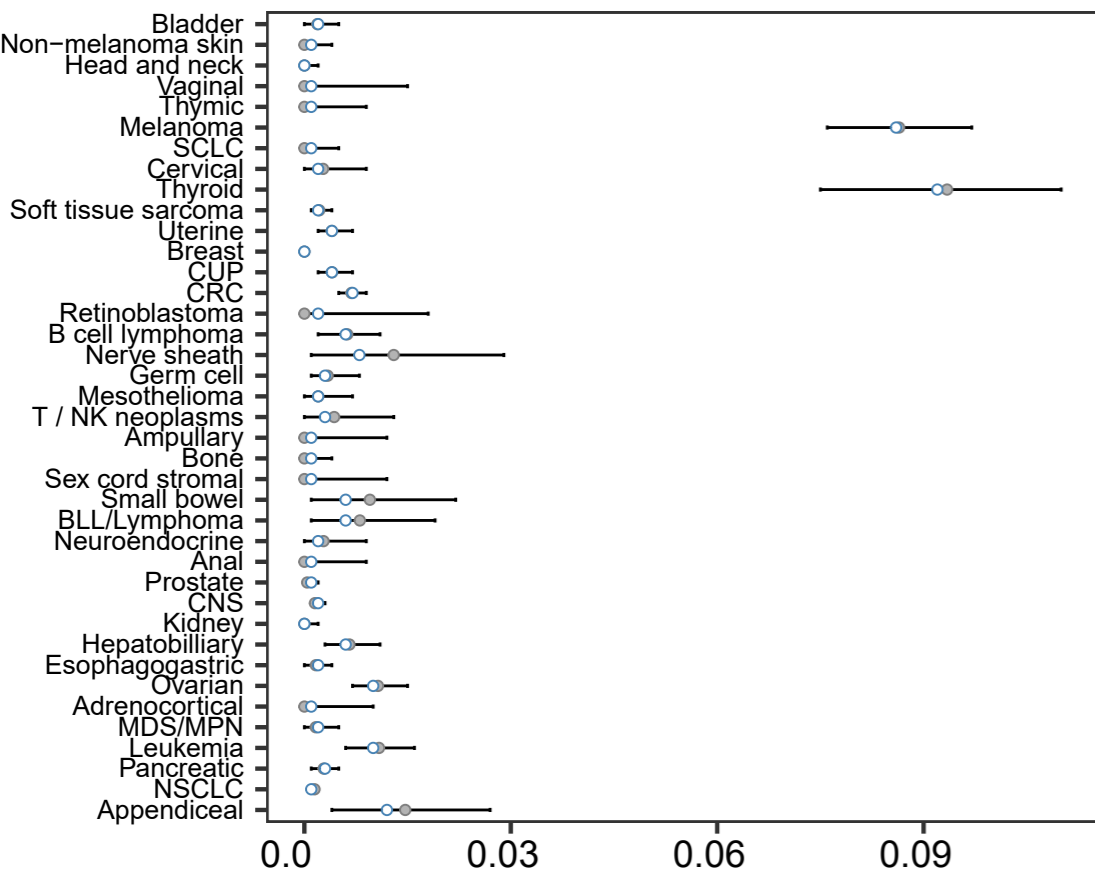

## NRAS 12D

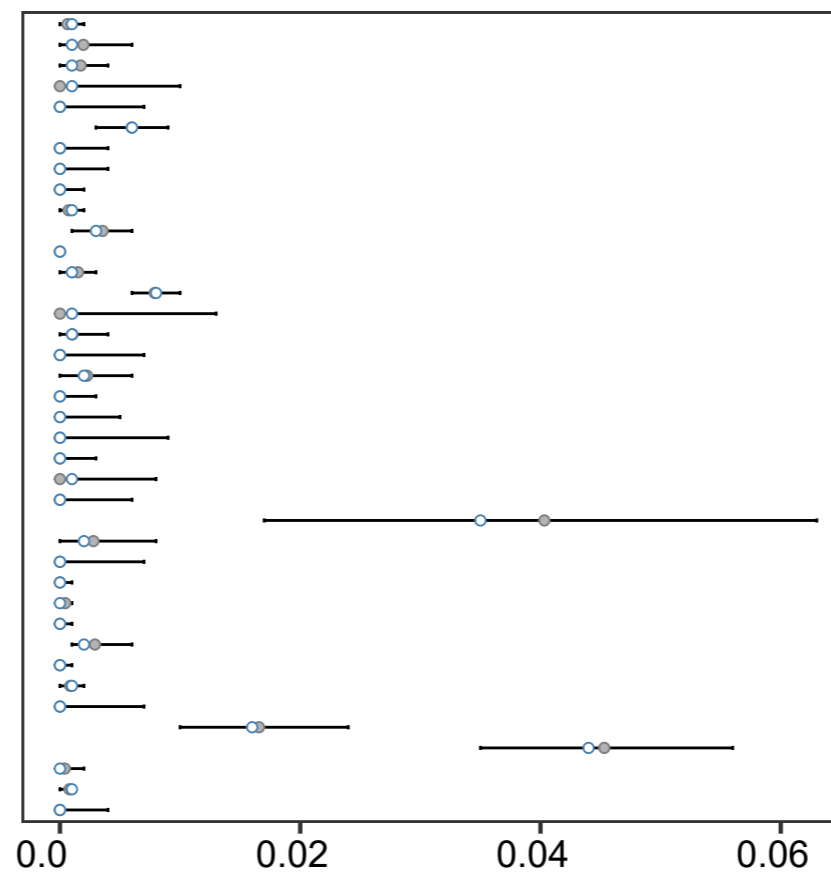

## NRAS 12S

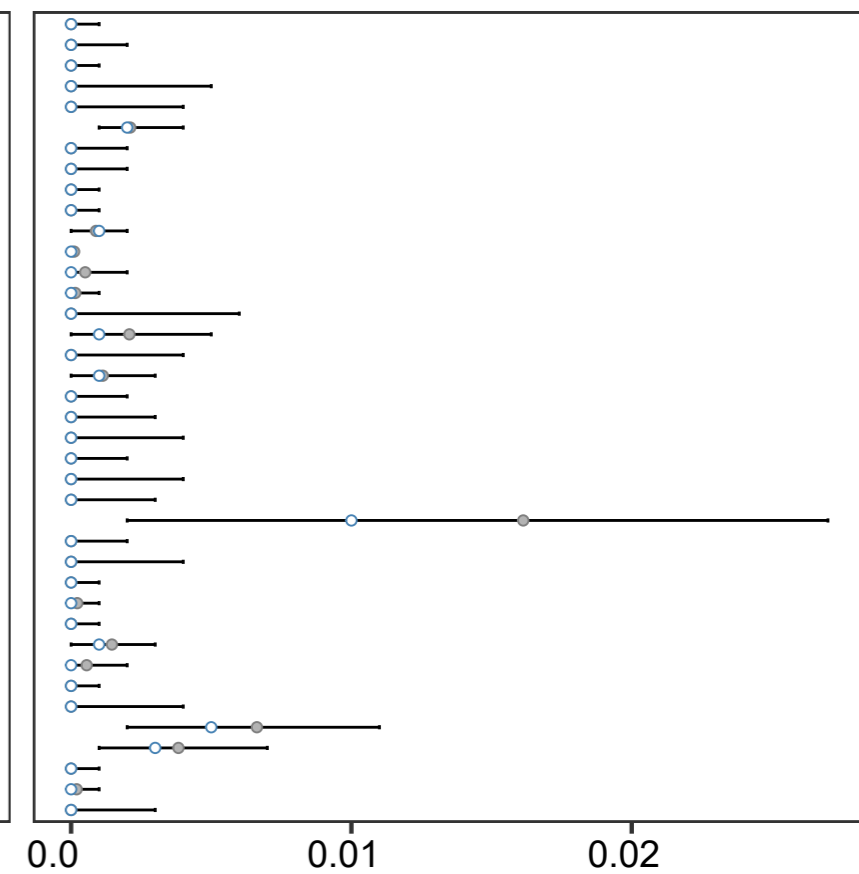

## NRAS 13D

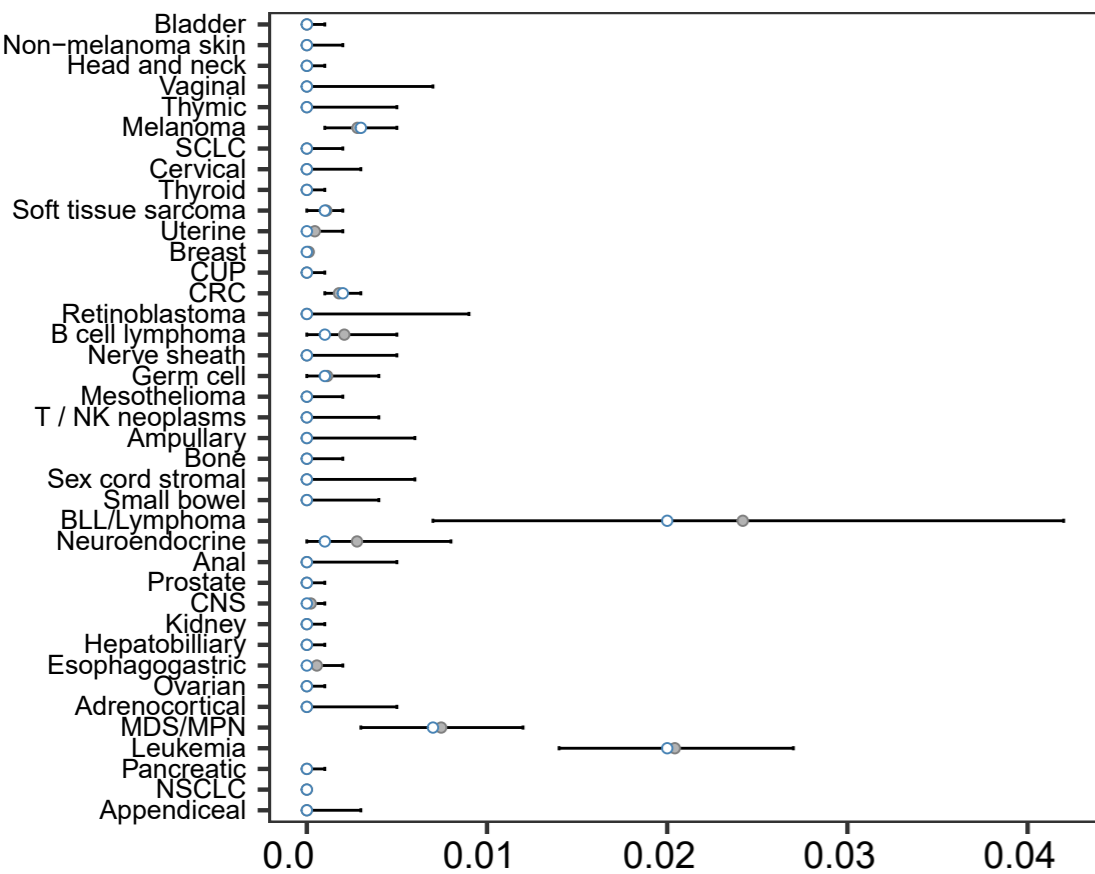

## NRAS 61K

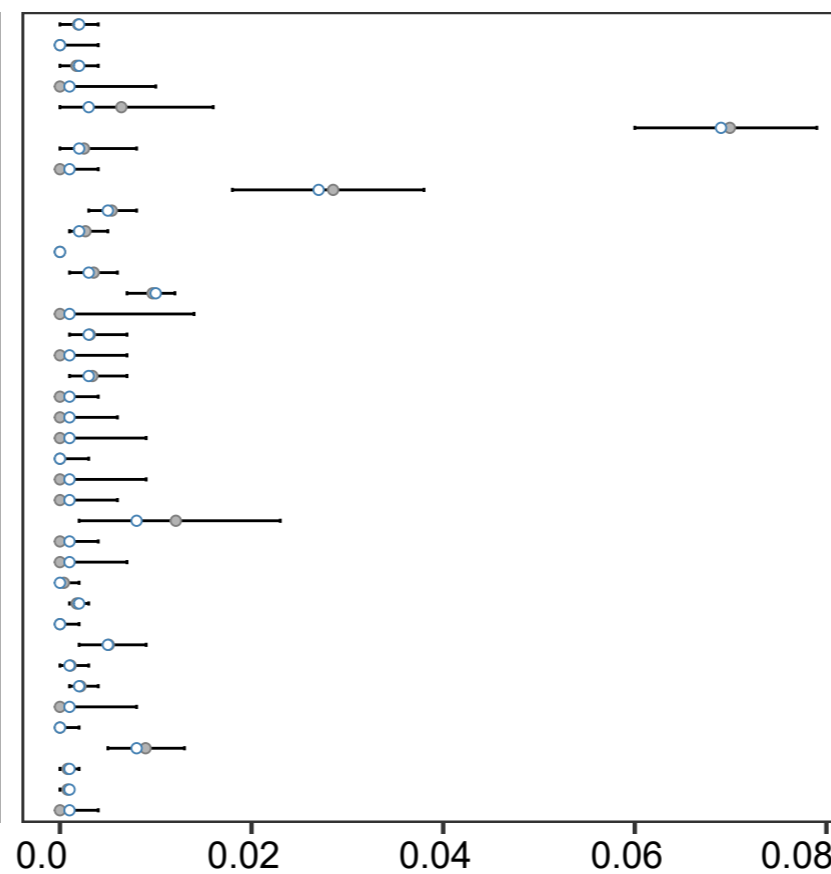

## NRAS 61L

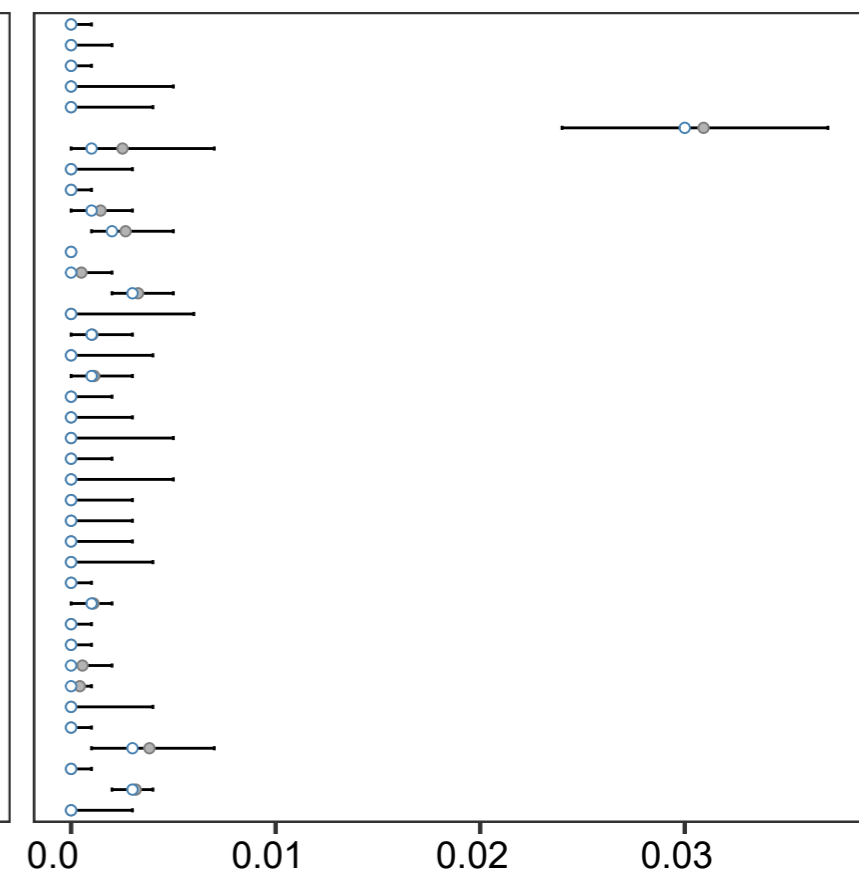

Prevalence

Supplement: can-22-1731_supplementary_fig.s6_supp6.pdf [file can-22-1731_supplementary_fig.s6_supp6.pdf]

# Supplementary Figure S7

**A**

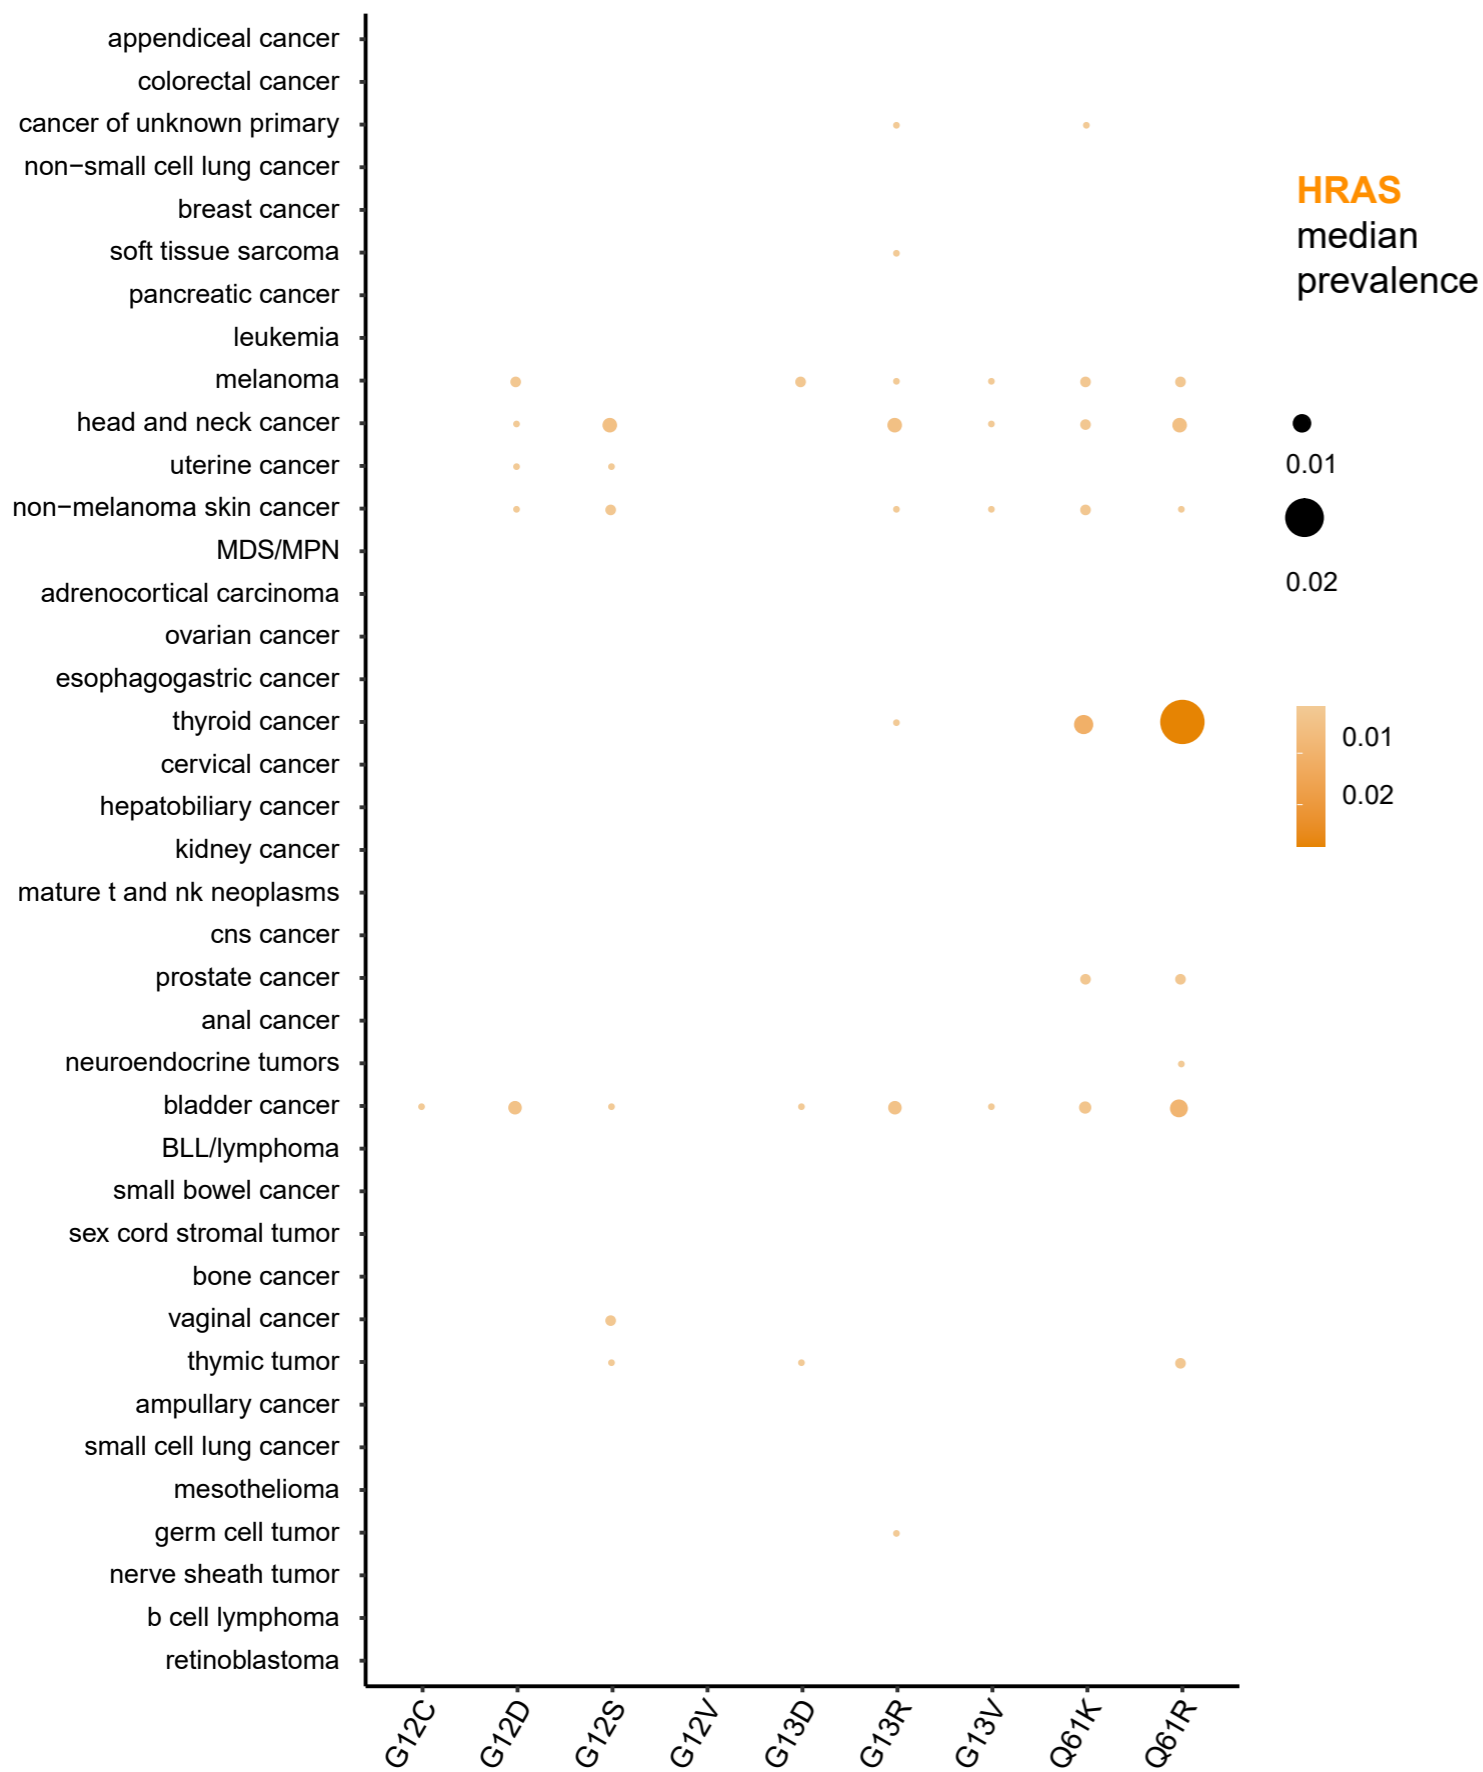

**B**

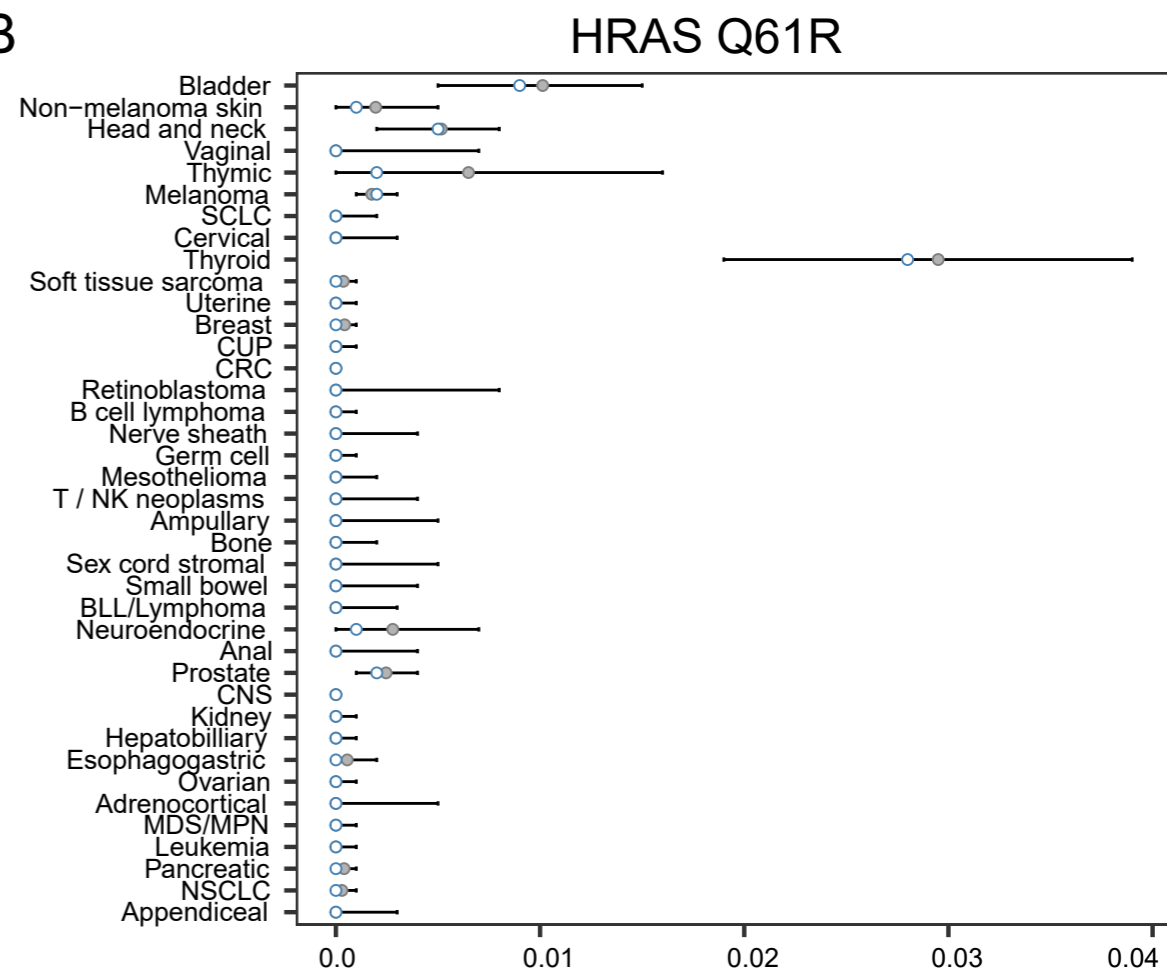

**C**

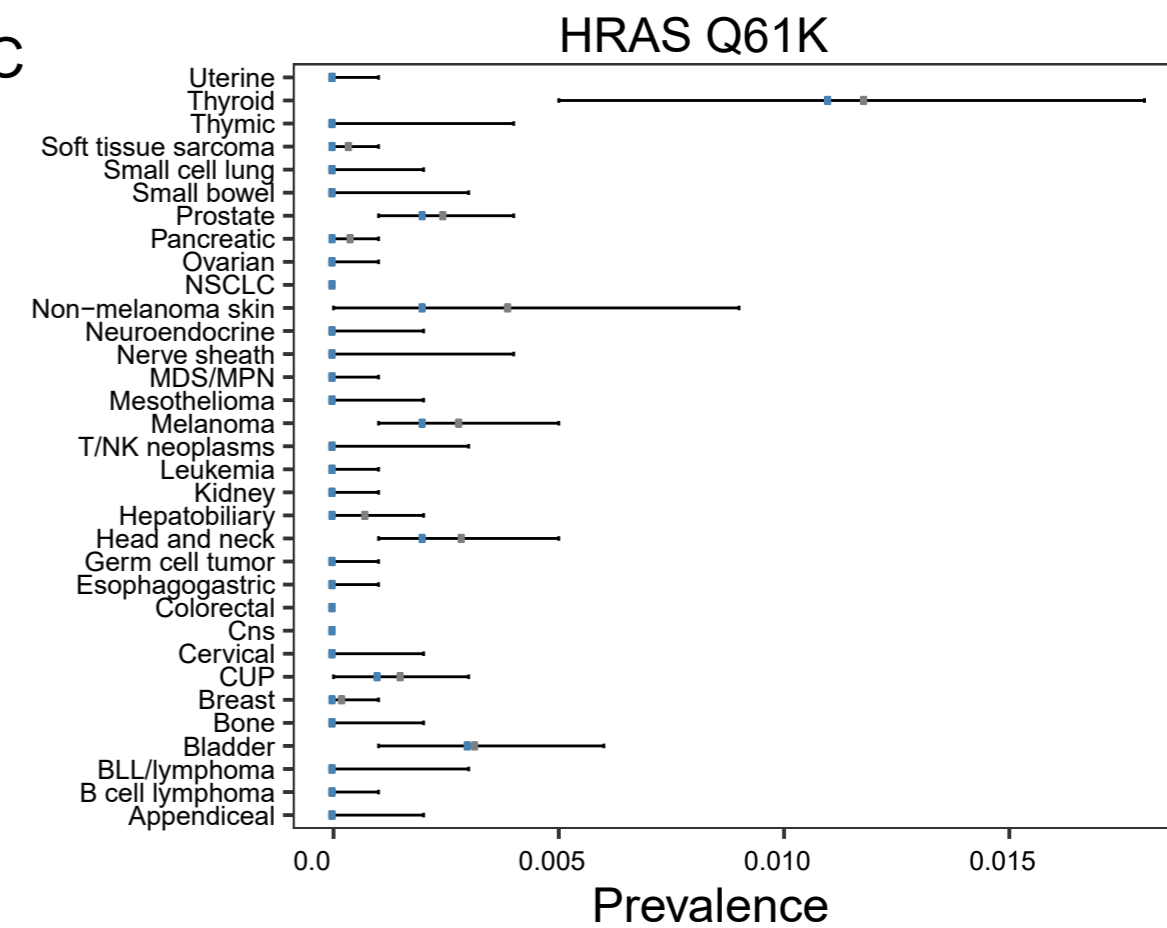

Supplement: can-22-1731_supplementary_fig.s7_supp7.pdf [file can-22-1731_supplementary_fig.s7_supp7.pdf]

# Supplementary Figure S8

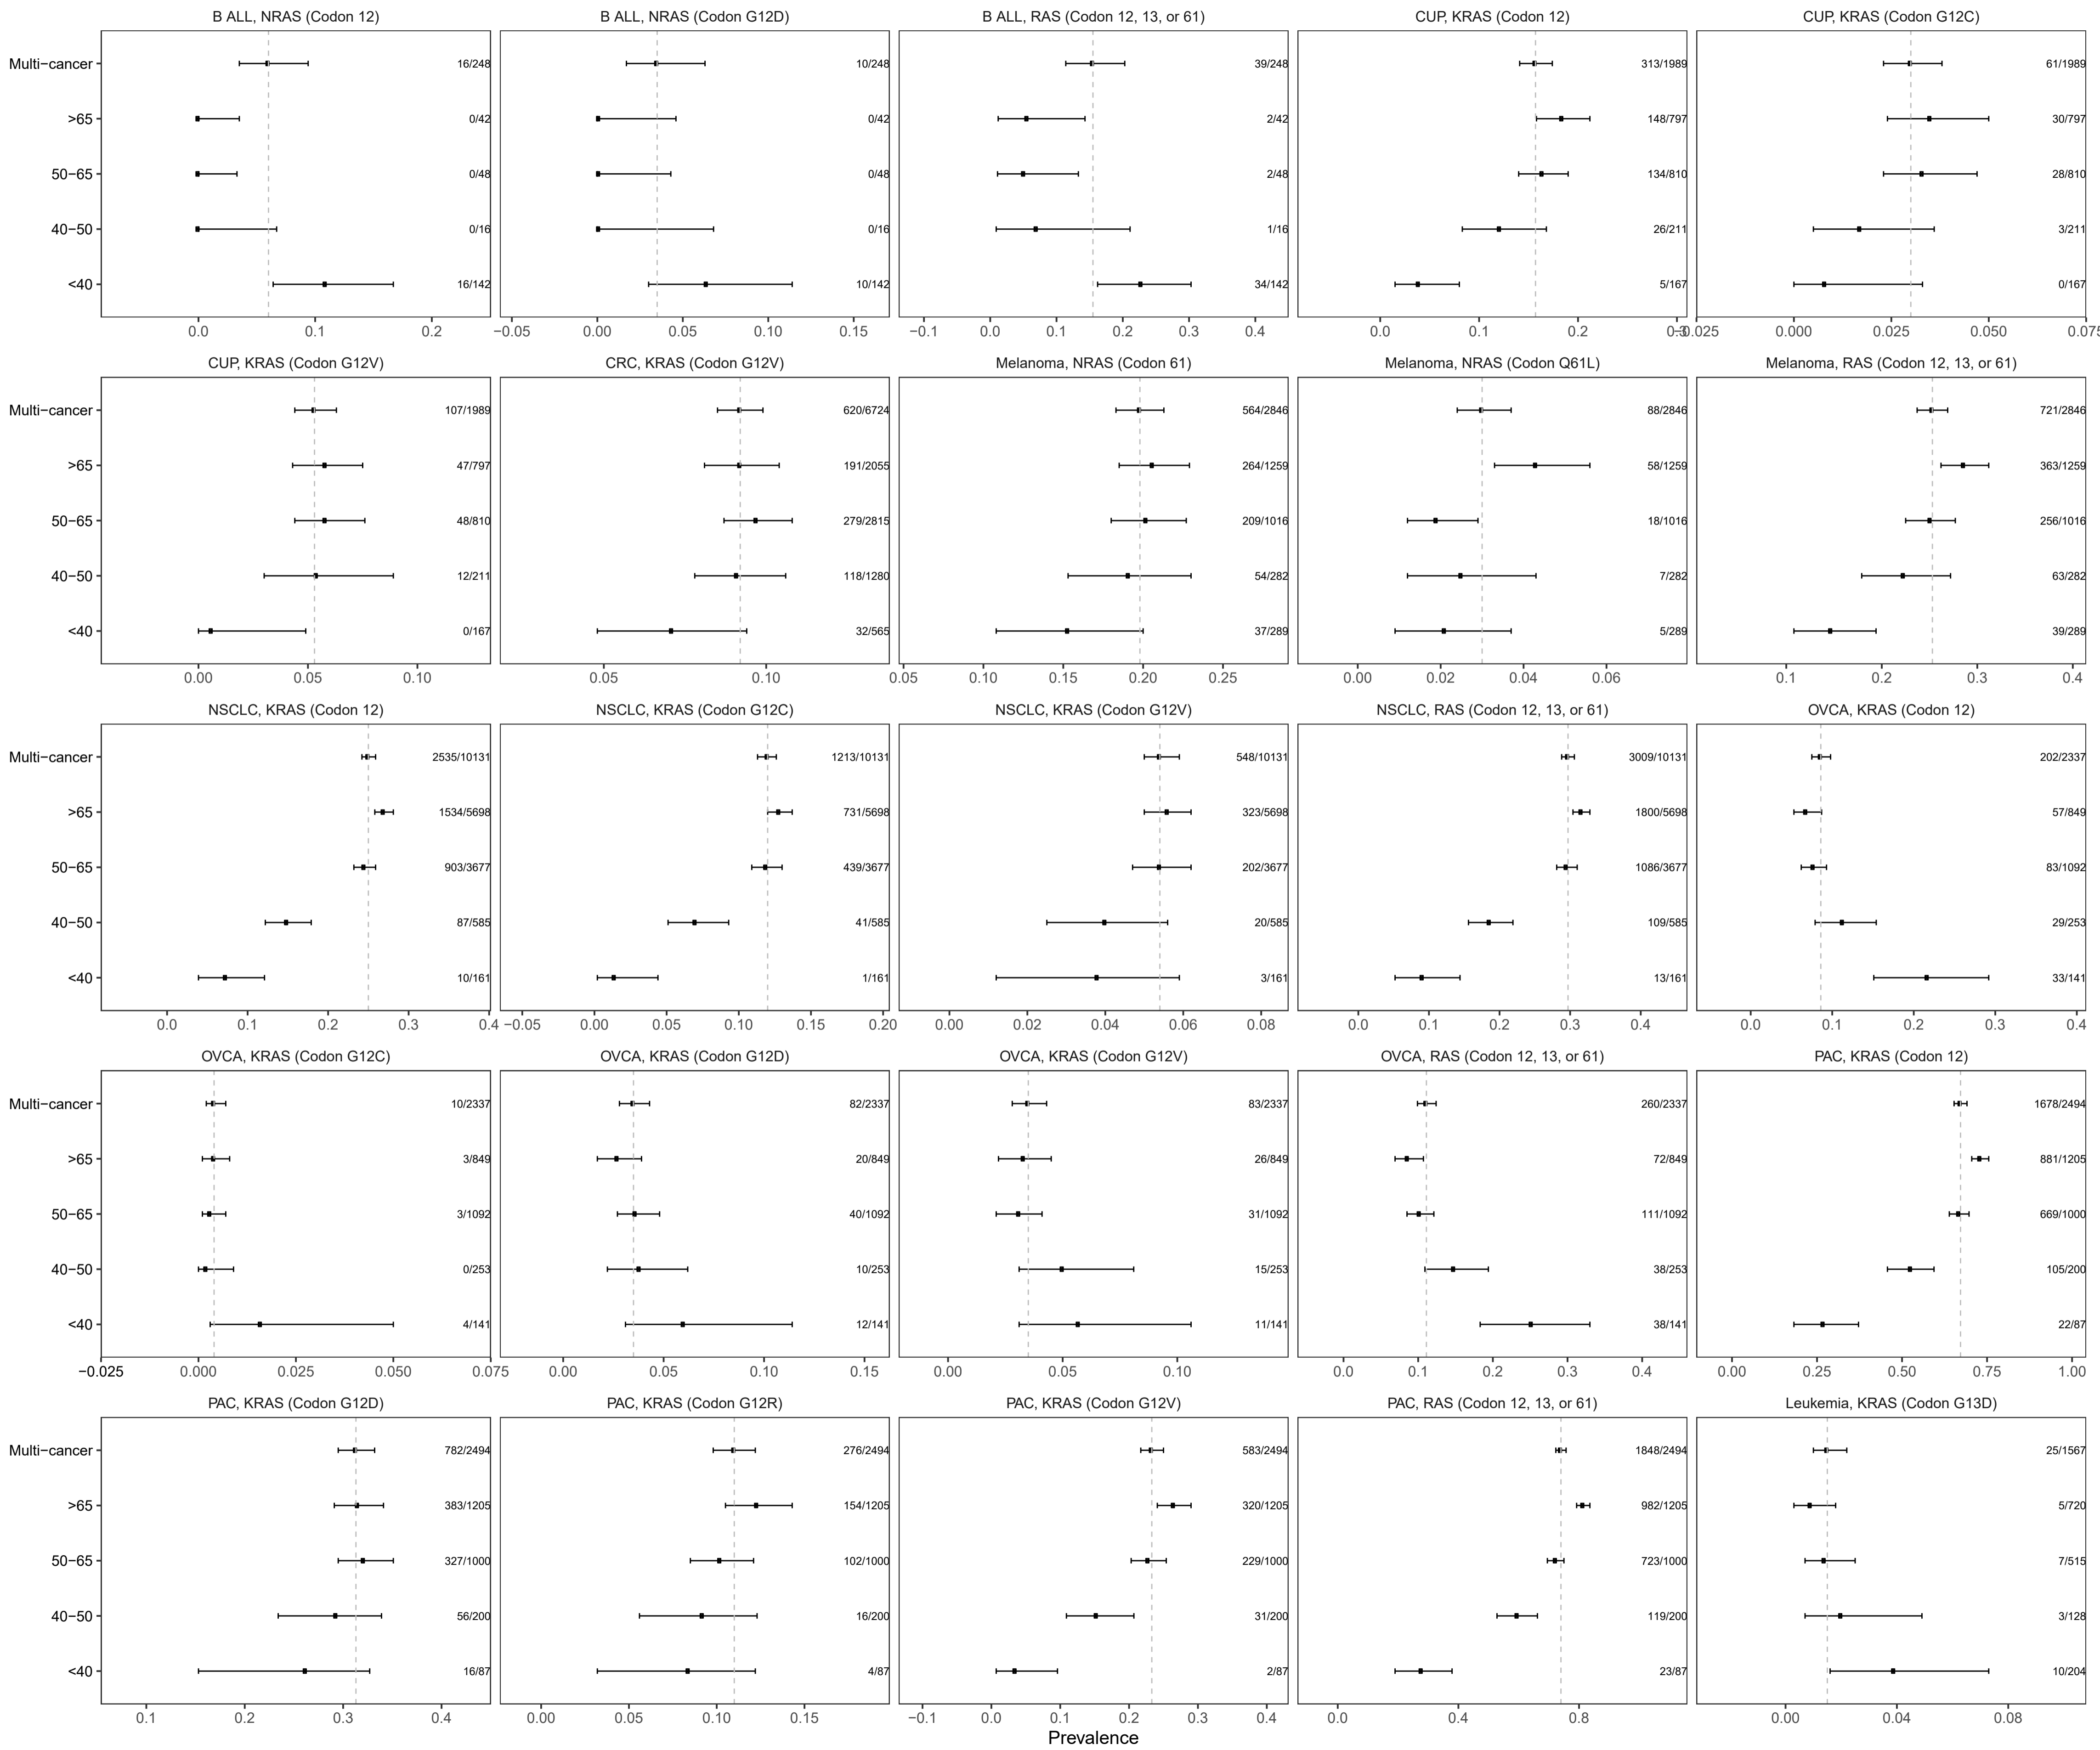

Supplement: can-22-1731_supplementary_fig.s8_supp8.pdf [file can-22-1731_supplementary_fig.s8_supp8.pdf]
